# Supplementary material for: Identification of Ovine Serum miRNAs Following Bacterial Lipopolysaccharide Challenge
Source: Int J Mol Sci. 2020 Oct 25;21(21):7920. doi: 10.3390/ijms21217920 (PMC7663744; doi:10.3390/ijms21217920)
Supplement: Supplementary file 1 [file ijms-21-07920-s001.xlsx]

## Sheet: Suppl Table S1
	Expression of Genes in PCR array panel
Genes Over-Expressed in
Post-treatement (T4) vs. Control (T0)
Position	Mature ID	Fold Regulation	p-value	miScript Catalog
A01	oar-miR-127	10.01	0.120751	MS00055132
A02	oar-miR-134-5p	2.75	0.159109	MS00055139
A03	oar-miR-136	11.17	0.0890398	MS00055146
A04	oar-miR-154a-3p	3.99	0.0266861	MS00055153
A12	oar-miR-329a-3p	13.22	0.0278992	MS00055209
B02	oar-miR-329b-3p	2.77	0.311936	MS00055223
B04	oar-miR-369-3p	140.89	0.0106741	MS00055237
B07	oar-miR-376a-3p	32.09	0.0500371	MS00055258
B11	oar-miR-376c-3p	2.69	0.169284	MS00055279
B12	oar-miR-376d	2.16	0.742756	MS00055286
C01	oar-miR-376e-3p	3.37	0.249881	MS00055293
C09	oar-miR-382-3p	4.48	0.161871	MS00055349
C10	oar-miR-382-5p	4.83	0.108997	MS00055356
C11	oar-miR-409-3p	2.62	0.085768	MS00055363
D01	oar-miR-410-3p	2.67	0.0879105	MS00055377
D02	oar-miR-410-5p	2.36	0.16408	MS00055384
D03	oar-miR-411a-3p	6.59	0.178832	MS00055391
D04	oar-miR-411a-5p	6.72	0.0503479	MS00055398
D08	oar-miR-432	26.15	0.165961	MS00055426
D10	oar-miR-485-3p	10.29	0.0769694	MS00055440
E02	oar-miR-487b-3p	12.29	0.0596943	MS00055468
E05	oar-miR-493-5p	23.86	0.209682	MS00055489
E06	oar-miR-495-3p	57.94	0.055386	MS00055496
F01	oar-miR-543-3p	22.15	0.00170581	MS00055545
F04	oar-miR-655-3p	8.99	0.01616	MS00055566
F08	oar-miR-668-3p	14.85	0.0221892	MS00055594
F10	oar-miR-758-5p	2.73	0.130797	MS00055608
G04	oar-miR-3955-3p	3.36	0.163801	MS00055650
G07	oar-miR-3957-3p	2.85	0.365862	MS00055671
G08	oar-miR-3957-5p	3.18	0.478119	MS00055678
Genes Under-Expressed in
Post-treatement (T4) vs. Control (T0)
Position	Mature ID	Fold Regulation	p-value	miScript Catalog
A06	oar-miR-154b-3p	-2.41	0.000932652	MS00055167
A10	oar-miR-323b	-2.6	0.00240328	MS00055195
A11	oar-miR-323c	-2.47	0.00441645	MS00055202
C06	oar-miR-380-5p	-2.78	0.00251968	MS00055328
D07	oar-miR-431	-2.11	0.131402	MS00055419
F05	oar-miR-655-5p	-2.33	0.116472	MS00055573
F07	oar-miR-665-5p	-2.54	0.00102677	MS00055587
G03	oar-miR-1197-5p	-2.61	0.00253651	MS00055643

## Sheet: Suppl Table S2
Pathways analysis
##Databases: PANTHER, KEGG PATHWAY, Reactome, Gene Ontology Slim, Gene Ontology
##Statistical test method: hypergeometric test / Fisher's exact test
##FDR correction method: Benjamini and Hochberg
#Term	Database	ID	Input number	Background number	P-Value	Corrected P-Value	Input	Hyperlink
PI3K-Akt signaling pathway	KEGG PATHWAY	bta04151	72	373	2.52981e-14	9.98884e-13	BCL2L1|IL7R|PDGFRA|PTK2|COL4A1|NRAS|LAMA2|PPP2R1B|BRCA1|G6PC2|FOXO3|PHLPP2|AKT2|AKT3|MCL1|COL9A1|BDNF|COL2A1|MDM2|IL6R|LAMC1|HGF|MET|CCNE2|RPS6KB1|GNG12|MAPK1|MAGI2|CDKN1B|ANGPT2|COL1A2|ANGPT1|FGF17|YWHAG|KDR|THBS2|ITGB1|PDGFA|IGF1R|NTF3|DDIT4|ERBB4|ITGB8	http://www.genome.jp/kegg-bin/show_pathway?bta04151/bta:505850%09red/bta:509827%09red/bta:615879%09red/bta:281572%09red/bta:506270%09red/bta:282191%09red/bta:281713%09red/bta:540786%09red/bta:529235%09red/bta:407170%09red/bta:281203%09red/bta:281201%09red
Immune System	Reactome	R-BTA-168256	121	851	3.75023e-14	1.40594e-12	BCL2L1|UBE2Q1|AGL|PPP3R1|SUMO1|MLEC|TSPAN14|IL6ST|CANX|DLG3|COL1A1|ASB7|ASB5|DYNLT1|MAP3K7|GOLGA7|CRISPLD2|DDX3X|PIANP|SCAMP1|IFNG|ENPP4|KLHL2|KITLG|RNF19B|CTSV|RNF19A|NKIRAS2|CXCL2|DZIP3|FBXL3|UBA52|RNF6|RNF7|ABCE1|ARPC1A|IL7R|TNFSF11|GAB1|CD200|ATP7A|PP	http://www.reactome.org/cgi-bin/eventbrowser_st_id?ST_ID=R-BTA-168256
Pathways in cancer	KEGG PATHWAY	bta05200	86	539	1.00593e-12	3.50112e-11	BCL2L1|PMAIP1|CRKL|IL6ST|AKT2|AKT3|KITLG|GNG12|CDH1|CDKN2B|IGF1R|IFNG|SP1|STK4|MDM2|BMP2|CCND2|TCF7L2|BAK1|PTEN|GNG2|IL7R|CDKN1B|RASSF5|GSK3B|CCNE2|IGF1|CHUK|COL4A6|COL4A5|COL4A4|VEGFA|VEGFC|FGF7|FZD4|RHOA|LAMC1|FGF2|GNAQ|CBL|COL4A3|CREBBP|PDGFRA|COL4A1|S	http://www.genome.jp/kegg-bin/show_pathway?bta05200/bta:281572%09red/bta:518180%09red/bta:539308%09red/bta:281677%09red/bta:527124%09red/bta:540378%09red/bta:536328%09red/bta:540526%09red/bta:514090%09red/bta:615414%09red/bta:317711%09red/bta:505908%09red
MAPK signaling pathway	KEGG PATHWAY	bta04010	58	292	3.01461e-12	1.0166e-10	HSPA2|PDGFRA|CRKL|CACNA1D|RRAS2|IGF1|RAP1B|HGF|AKT2|AKT3|MAPK10|IL1A|BDNF|CACNB4|TGFB2|PPP3R1|PPM1A|MET|MAP3K2|CACNB2|CACNA1B|NRAS|MAP3K7|GNG12|RASA1|MAPK1|ANGPT2|NLK|MAPK9|FGF17|KDR|PDGFA|IGF1R|NTF3|SRF|ANGPT1|ERBB4|EFNA5|EFNA4|CHUK|MECOM|STK3|STK4|VEGFC	http://www.genome.jp/kegg-bin/show_pathway?bta04010/bta:529146%09red/bta:615879%09red/bta:281572%09red/bta:532712%09red/bta:518180%09red/bta:519269%09red/bta:407170%09red/bta:282321%09red/bta:282323%09red/bta:282141%09red/bta:533491%09red/bta:282032%09red
Focal adhesion	KEGG PATHWAY	bta04510	46	198	5.72977e-12	1.87394e-10	PDGFRA|PTK2|COL4A1|CRKL|LAMA2|RAP1B|BIRC3|HGF|AKT2|AKT3|MAPK10|ARHGAP5|CAV2|MET|COL2A1|THBS2|MAPK1|MAPK9|KDR|ITGB1|PDGFA|IGF1R|IGF1|ITGB8|MYLK4|COL9A1|COL4A6|COL4A5|CCND2|COL4A3|VEGFC|PAK5|TNC|RHOA|LAMC1|ACTN1|PARVA|VAV3|VAV2|GSK3B|PTEN|COL4A4|COL1A2|COL1	http://www.genome.jp/kegg-bin/show_pathway?bta04510/bta:515718%09red/bta:281572%09red/bta:506270%09red/bta:532712%09red/bta:282191%09red/bta:536286%09red/bta:540786%09red/bta:407170%09red/bta:518025%09red/bta:514386%09red/bta:513432%09red/bta:524770%09red
Ras signaling pathway	KEGG PATHWAY	bta04014	50	242	2.79418e-11	8.38016e-10	BCL2L1|PDGFRA|RRAS2|RASSF5|RAP1B|GAB1|PLCG2|AKT2|AKT3|MAPK10|REL|BDNF|KITLG|HGF|NRAS|ARF6|GNG12|FGF2|ETS2|TIAM1|ETS1|ANGPT2|MAPK9|FGF17|MAPK1|PDGFA|IGF1R|NTF3|RALGDS|RAB5B|EFNA5|EFNA4|GNB1|CHUK|STK4|VEGFC|PAK5|FGF7|RHOA|RASA1|RASA2|ANGPT1|MET|GNG2|KDR|IGF	http://www.genome.jp/kegg-bin/show_pathway?bta04014/bta:539150%09red/bta:538477%09red/bta:615879%09red/bta:281572%09red/bta:532712%09red/bta:540313%09red/bta:407170%09red/bta:281203%09red/bta:282323%09red/bta:282032%09red/bta:282152%09red/bta:282301%09red
FoxO signaling pathway	KEGG PATHWAY	bta04068	32	132	3.81474e-09	8.82965e-08	IL7R|TGFB2|CDKN1B|PRKAG2|IGF1R|G6PC2|FOXO3|FOXO1|AKT3|MAPK10|STAT3|NRAS|CSNK1E|HOMER1|NLK|MAPK9|CDKN2B|SIRT1|IGF1|PRKAB2|CHUK|PRKAA2|ATG12|STK4|MDM2|SETD7|SGK1|CCND2|AKT2|PTEN|MAPK1|CREBBP	http://www.genome.jp/kegg-bin/show_pathway?bta04068/bta:534125%09red/bta:534069%09red/bta:768234%09red/bta:527124%09red/bta:540378%09red/bta:505453%09red/bta:535530%09red/bta:100137872%09red/bta:514886%09red/bta:504219%09red/bta:512665%09red/bta:767903%09
Rap1 signaling pathway	KEGG PATHWAY	bta04015	42	216	5.00093e-09	1.13333e-07	PDGFRA|CRKL|RASSF5|RAP1B|DOCK4|KRIT1|AKT2|AKT3|GNAI3|CNR1|HGF|NRAS|TIAM1|MAPK1|MAGI2|CDH1|ANGPT1|FGF17|KDR|ITGB1|PDGFA|IGF1R|IGF1|RALGDS|EFNA5|EFNA4|SIPA1L1|VEGFA|VEGFC|FGF7|RHOA|FGF2|KITLG|GNAQ|VAV3|VAV2|MET|ANGPT2|CDC42|PRKD1|RALA|PRKD3	http://www.genome.jp/kegg-bin/show_pathway?bta04015/bta:515718%09red/bta:538477%09red/bta:407996%09red/bta:615879%09red/bta:281572%09red/bta:532712%09red/bta:518180%09red/bta:407170%09red/bta:539521%09red/bta:100298336%09red/bta:536654%09red/bta:282301%09
Post-translational protein modification	Reactome	R-BTA-597592	84	632	5.57472e-09	1.25329e-07	PGAP1|HIF3A|ST6GAL2|ASB7|ACTR10|SUMO1|ADAMTS9|MAN1C1|SCG2|COMMD7|DOLPP1|ADAMTS10|DCUN1D4|GALNT18|VDAC2|BMI1|PEX12|DCTN6|NAPB|OTUD7B|TMED2|ADAMTS3|ASB5|DYNC1I1|ADAMTS2|TADA2B|ADAM10|THRB|MAP3K7|RORA|NAPG|PPP6C|WSB1|UBE2G1|PSMA5|NANP|PSMC2|USP37|FEM1B|FEM1C	http://www.reactome.org/cgi-bin/eventbrowser_st_id?ST_ID=R-BTA-597592
Signal Transduction	Reactome	R-BTA-162582	131	1174	8.86061e-09	1.92153e-07	PPP3R1|IL6ST|BDNF|CAV2|GPR37|DLG3|OTUD7B|CDC73|MAP3K7|GNG12|GOPC|ESRP1|CBFB|PHC3|PTBP1|MTMR4|CENPK|HTR1E|SP1|SMAD1|FLRT3|STK3|STK4|NMT2|LRP6|KITLG|PDE8A|CXCL2|BMP2|ARPC1A|NPY1R|UBA52|GNG2|HNRNPH1|RNF2|ARHGAP19|ACVR1C|METAP1|CDKN1B|KHDRBS3|GAB1|MED1|PREX2|	http://www.reactome.org/cgi-bin/eventbrowser_st_id?ST_ID=R-BTA-162582
Axon guidance	KEGG PATHWAY	bta04360	37	180	1.13913e-08	2.4366e-07	NCK2|PTK2|RYK|PPP3R1|EPHA7|EPHA5|EPHA4|SRGAP3|SMO|PLCG2|TRPC1|GNAI3|FZD3|NRAS|MAPK1|SLIT3|ITGB1|BMP7|LRRC4|UNC5C|EFNA5|EFNA4|CFL2|RHOA|RASA1|NCK1|PLXNC1|SEMA3D|SEMA5A|ROBO1|PLXNA2|NTN4|GSK3B|MET|BMPR2|PAK5|CDC42	http://www.genome.jp/kegg-bin/show_pathway?bta04360/bta:100337091%09red/bta:100337226%09red/bta:615879%09red/bta:506270%09red/bta:512892%09red/bta:532712%09red/bta:536815%09red/bta:282321%09red/bta:539521%09red/bta:282032%09red/bta:445419%09red/bta:537455
@@Axon guidance	Reactome	R-BTA-422475	19	102	0.000124365	0.00129185	PLXNC1|NCK2|NCK1|GAP43|NRAS|ARPC1A|EFNA4|NTN4|EZR|GAB1|GPC1|UBA52|SLIT3|WASL|PTPRA|PLXNA2|CRMP1|RHOB|RHOA	http://www.reactome.org/cgi-bin/eventbrowser_st_id?ST_ID=R-BTA-422475
AGE-RAGE signaling pathway in diabetic complications	KEGG PATHWAY	bta04933	27	103	1.54242e-08	3.23541e-07	TGFB2|COL4A1|CDKN1B|PLCG2|FOXO1|AKT3|MAPK10|COL3A1|IL1A|STAT3|STAT1|EGR1|NRAS|MAPK1|MAPK9|PRKCE|CYBB|COL4A6|COL4A5|COL4A4|COL4A3|VEGFC|AKT2|COL1A2|COL1A1|VEGFA|CDC42	http://www.genome.jp/kegg-bin/show_pathway?bta04933/bta:281572%09red/bta:532712%09red/bta:282191%09red/bta:510814%09red/bta:510833%09red/bta:281112%09red/bta:511602%09red/bta:100137872%09red/bta:534923%09red/bta:508541%09red/bta:100337091%09red/bta:317711
Adherens junction	KEGG PATHWAY	bta04520	22	69	1.79734e-08	3.75338e-07	WASL|SORBS1|RHOA|MAP3K7|NECTIN3|MAPK1|CDH1|NLK|IGF1R|SSX2IP|SNAI2|PTPN1|CTNNA3|ACTN1|TJP1|TCF7L2|MET|PTPRB|BAIAP2|PTPRJ|CREBBP|CDC42	http://www.genome.jp/kegg-bin/show_pathway?bta04520/bta:281577%09red/bta:508150%09red/bta:532712%09red/bta:780777%09red/bta:507837%09red/bta:505453%09red/bta:524770%09red/bta:505696%09red/bta:504625%09red/bta:508658%09red/bta:281848%09red/bta:540481%09red
Proteoglycans in cancer	KEGG PATHWAY	bta05205	39	202	2.06188e-08	4.26163e-07	TGFB2|PTK2|NRAS|RRAS2|GAB1|SMO|PLCG2|AKT2|AKT3|EZR|CAV2|MDM2|FZD3|FZD4|FZD5|HBEGF|RPS6KB1|TIAM1|MAPK1|KDR|ITGB1|IGF1R|IGF1|ERBB4|GPC1|VEGFA|HGF|STAT3|RHOA|FGF2|CTSV|EIF4B|VAV3|VAV2|CBL|MET|ANK3|PRKACB|CDC42	http://www.genome.jp/kegg-bin/show_pathway?bta05205/bta:515718%09red/bta:281574%09red/bta:505850%09red/bta:281572%09red/bta:506270%09red/bta:532712%09red/bta:519269%09red/bta:493642%09red/bta:407170%09red/bta:539308%09red/bta:282323%09red/bta:522921%09red
Human papillomavirus infection	KEGG PATHWAY	bta05165	54	345	2.93086e-08	6.01359e-07	PPP2R1B|PTK2|TNC|NRAS|BAK1|AKT2|AKT3|ATR|TCF7L2|PATJ|COL2A1|DLG1|NFX1|DLG3|FZD3|FZD4|FZD5|STAT1|THBS2|CCNE2|RBPJ|UBE3A|RPS6KB1|MAPK1|CDKN1B|ITGB1|LAMA2|ITGB8|COL1A1|CHUK|PPP2R2C|COL9A1|COL4A6|COL4A5|COL4A4|VEGFA|CREB1|COL4A1|MDM2|LAMC1|HEY2|HEY1|COL4A3|CC	http://www.genome.jp/kegg-bin/show_pathway?bta05165/bta:513730%09red/bta:538619%09red/bta:281572%09red/bta:506270%09red/bta:532712%09red/bta:282191%09red/bta:281713%09red/bta:282195%09red/bta:338092%09red/bta:510814%09red/bta:282323%09red/bta:504869%09red
TGF-beta signaling pathway	KEGG PATHWAY	bta04350	25	93	3.42876e-08	6.98436e-07	PPP2R1B|ACVR1C|ZFYVE16|SMAD6|SMAD1|RPS6KB1|INHBB|MAPK1|SMAD5|CDKN2B|ACVR2A|LTBP1|IFNG|SP1|FBN1|RHOA|TGFB2|BMP7|BMP2|ID4|NOG|BMPR2|TFDP1|TGIF2|CREBBP	http://www.genome.jp/kegg-bin/show_pathway?bta04350/bta:536671%09red/bta:281154%09red/bta:536380%09red/bta:768050%09red/bta:615037%09red/bta:527124%09red/bta:505453%09red/bta:281598%09red/bta:535632%09red/bta:534579%09red/bta:511279%09red/bta:404181%09red
@@TGF-beta signaling pathway	PANTHER	P00052	12	39	4.14492e-05	0.000487296	BMP7|TLL1|TGFB2|BMP2|ACVR1C|ACVR2A|NRAS|SMAD1|MAP3K7|MAPK10|SKIL|CREBBP	http://www.pantherdb.org/pathway/pathwayDiagram.jsp?catAccession=P00052
EGFR tyrosine kinase inhibitor resistance	KEGG PATHWAY	bta01521	23	80	4.27066e-08	8.53889e-07	BCL2L1|PDGFRA|NRAS|GAB1|FOXO3|PLCG2|AKT2|AKT3|STAT3|MET|RPS6KB1|MAPK1|KDR|PDGFA|IGF1R|IGF1|IL6R|VEGFA|HGF|FGF2|EIF4E2|GSK3B|PTEN	http://www.genome.jp/kegg-bin/show_pathway?bta01521/bta:281572%09red/bta:519920%09red/bta:407170%09red/bta:282152%09red/bta:282301%09red/bta:535530%09red/bta:100137872%09red/bta:404181%09red/bta:534923%09red/bta:508541%09red/bta:100337091%09red/bta:281239
Adaptive Immune System	Reactome	R-BTA-1280218	49	307	7.44444e-08	1.44144e-06	UBE2Q1|PPP3R1|RAP1B|CBLL1|NCK1|AP1S3|CD200|RNF34|COL2A1|CANX|SIAH1|ASB7|ASB5|UBE3A|NRAS|MAP3K7|PRKG1|WSB1|UBE2G1|RNF138|COL1A2|MALT1|FBXW7|ITGB1|PIANP|CXADR|COL1A1|CHUK|UBE2E2|CYBB|KLHL2|TRIM63|RNF19B|CTSV|RNF19A|UBE2H|UBE2K|DZIP3|ZNRF2|FBXL3|DAPP1|UBA52|	http://www.reactome.org/cgi-bin/eventbrowser_st_id?ST_ID=R-BTA-1280218
Transcriptional misregulation in cancer	KEGG PATHWAY	bta05202	36	188	8.49259e-08	1.63764e-06	BCL2L1|PTK2|GRIA3|SMAD1|NFKBIZ|FOXO1|IGF1|RUNX1T1|REL|CCNT2|POLK|HPGD|MLF1|CEBPB|CEBPA|CDK14|HOXA10|KLF3|MLLT3|CDKN1B|PDGFA|IGF1R|HHEX|MYCN|SP1|BMI1|PAX5|MDM2|PBX3|ETV5|LMO2|CCND2|BAK1|MET|ELK4|MAF	http://www.genome.jp/kegg-bin/show_pathway?bta05202/bta:506270%09red/bta:541166%09red/bta:539542%09red/bta:281677%09red/bta:512259%09red/bta:540378%09red/bta:282152%09red/bta:338319%09red/bta:534626%09red/bta:784386%09red/bta:538628%09red/bta:514090%09red
Signaling pathways regulating pluripotency of stem cells	KEGG PATHWAY	bta04550	30	139	1.07347e-07	2.03381e-06	ACVR1C|HESX1|SMAD5|JARID2|SMAD1|ZFHX3|IL6ST|AKT2|AKT3|LIFR|FZD3|FZD4|FZD5|NRAS|INHBB|MAPK1|ACVR2A|IGF1R|IGF1|RIF1|BMI1|PAX6|SKIL|STAT3|FGF2|PCGF3|ID4|GSK3B|BMPR2|KAT6A	http://www.genome.jp/kegg-bin/show_pathway?bta04550/bta:528253%09red/bta:538536%09red/bta:539504%09red/bta:445416%09red/bta:536380%09red/bta:768050%09red/bta:445419%09red/bta:281598%09red/bta:100137872%09red/bta:541247%09red/bta:540488%09red/bta:100848012
Autophagy - animal	KEGG PATHWAY	bta04140	29	133	1.44194e-07	2.68502e-06	BCL2L1|UVRAG|RRAS2|PRKAA2|AKT2|AKT3|MAPK10|RB1CC1|NRAS|RPS6KB1|MAP3K7|MAPK1|ATG7|ATG5|MAPK9|MTMR3|IGF1R|DDIT4|WIPI2|SH3GLB1|ATG12|LAMP2|CTSV|NRBF2|MTMR4|EIF2AK3|PTEN|STX17|PRKACB	http://www.genome.jp/kegg-bin/show_pathway?bta04140/bta:529146%09red/bta:512685%09red/bta:768316%09red/bta:782743%09red/bta:534125%09red/bta:519269%09red/bta:282323%09red/bta:282152%09red/bta:535820%09red/bta:100137872%09red/bta:614285%09red/bta:404181%09
Gene expression (Transcription)	Reactome	R-BTA-74160	61	445	2.63936e-07	4.70943e-06	RPAP2|KCTD1|MTF2|ASH2L|SUMO1|CDKN1B|PRKAA2|ERCC6|RORB|FOXO3|HIPK1|DEK|GTF2A1|TEAD2|ELF1|CBX6|RNF34|ZNF599|CPSF2|SRSF5|CCNT2|BTG2|SRSF2|RBPJ|AFF4|THRB|ZNF706|RORA|ZNF704|DDIT4|CBFB|ING2|PHC3|NABP1|NR3C2|SIRT1|PRKAB2|SUPT16H|SP1|PRMT6|BMI1|PPM1D|SKIL|THOC1|	http://www.reactome.org/cgi-bin/eventbrowser_st_id?ST_ID=R-BTA-74160
Metabolism of proteins	Reactome	R-BTA-392499	98	872	5.11744e-07	8.72254e-06	PGAP1|HIF3A|SUMO1|SCG2|DOLPP1|SLC30A5|OTUD7B|ASB7|ADAMTS3|ASB5|ADAMTS9|MAP3K7|GNG12|NAPG|N6AMT1|NAPB|PHC3|NUP210|KLHL2|USP37|FBXL3|UBA52|ARF5|GNG2|RNF7|RNF2|TADA2B|PPP6C|WSB1|B4GALT6|IGF1|GCG|SENP5|SENP2|SENP1|PSME3|ADAMTS6|DCUN1D4|DCUN1D5|CDC73|RHOA|TUBB	http://www.reactome.org/cgi-bin/eventbrowser_st_id?ST_ID=R-BTA-392499
Signaling by Receptor Tyrosine Kinases	Reactome	R-BTA-9006934	33	179	6.1123e-07	1.02924e-05	PDGFRA|GAB1|HNRNPH1|BDNF|COL2A1|KITLG|NRAS|PDE3B|HBEGF|ESRP1|PTBP1|KDR|CHEK1|NTF3|CYBB|COL5A3|SHB|VEGFC|BAIAP2|RHOA|FGF2|NRP2|GALNT3|NCK1|NCK2|ABI2|FLRT3|KL|UBA52|EREG|ATP6V1G1|PRKACB|ATP6V1C2	http://www.reactome.org/cgi-bin/eventbrowser_st_id?ST_ID=R-BTA-9006934
Protein digestion and absorption	KEGG PATHWAY	bta04974	25	113	8.10128e-07	1.32065e-05	COL10A1|COL11A1|SLC7A8|COL3A1|COL2A1|SLC6A19|SLC8A1|KCNJ13|ELN|SLC38A2|ATP1B1|COL5A2|COL4A6|COL4A5|COL4A4|COL4A3|COL4A1|COL9A1|COL15A1|COL7A1|COL5A3|COL5A1|COL1A2|COL1A1|COL21A1	http://www.genome.jp/kegg-bin/show_pathway?bta04974/bta:536818%09red/bta:519758%09red/bta:100139730%09red/bta:533456%09red/bta:282191%09red/bta:507133%09red/bta:282195%09red/bta:510833%09red/bta:538590%09red/bta:511602%09red/bta:337925%09red/bta:317711%09
RNA Polymerase II Transcription	Reactome	R-BTA-73857	57	420	8.5541e-07	1.38915e-05	NR3C1|KCTD1|ASH2L|SUMO1|CDKN1B|PRKAA2|RORB|FOXO3|HIPK1|DEK|GTF2A1|TEAD2|ELF1|CBX6|RNF34|ZNF599|CPSF2|SRSF5|CCNT2|BTG2|SRSF2|RBPJ|AFF4|THRB|ZNF706|RORA|ZNF704|DDIT4|CBFB|ING2|PHC3|NABP1|NR3C2|SIRT1|PRKAB2|SUPT16H|SP1|PRMT6|BMI1|PPM1D|SKIL|THOC1|CTSV|NRBF2|	http://www.reactome.org/cgi-bin/eventbrowser_st_id?ST_ID=R-BTA-73857
Longevity regulating pathway	KEGG PATHWAY	bta04211	22	90	8.83977e-07	1.4306e-05	SESN1|SESN3|NRAS|PRKAG2|IGF1R|FOXO3|AKT2|AKT3|RB1CC1|RPS6KB1|PPARGC1A|ATG5|SIRT1|IGF1|PRKAB2|CREB1|PRKAA2|EIF4E2|FOXO1|KL|PRKACB|ATF2	http://www.genome.jp/kegg-bin/show_pathway?bta04211/bta:281713%09red/bta:282323%09red/bta:538226%09red/bta:535530%09red/bta:100137872%09red/bta:338446%09red/bta:515914%09red/bta:504219%09red/bta:512665%09red/bta:404181%09red/bta:538954%09red/bta:534923%09
ErbB signaling pathway	KEGG PATHWAY	bta04012	21	85	1.34368e-06	2.12815e-05	CBLB|NCK2|PTK2|ERBB4|CRKL|PLCG2|RPS6KB1|GSK3B|NRAS|CBL|GAB1|HBEGF|AKT2|AKT3|MAPK10|EREG|CDKN1B|PAK5|MAPK9|MAPK1|NCK1	http://www.genome.jp/kegg-bin/show_pathway?bta04012/bta:100337091%09red/bta:525906%09red/bta:100137872%09red/bta:527418%09red/bta:100295476%09red/bta:506270%09red/bta:790875%09red/bta:518180%09red/bta:540085%09red/bta:404181%09red/bta:522419%09red/bta:526
Small cell lung cancer	KEGG PATHWAY	bta05222	22	94	1.6429e-06	2.54207e-05	BCL2L1|ITGB1|PTK2|CDKN1B|BIRC3|AKT2|AKT3|POLK|CCNE2|APAF1|CDKN2B|LAMA2|TRAF4|CHUK|COL4A6|COL4A5|COL4A4|COL4A3|COL4A1|LAMC1|BAK1|PTEN	http://www.genome.jp/kegg-bin/show_pathway?bta05222/bta:506270%09red/bta:282191%09red/bta:514386%09red/bta:527124%09red/bta:511602%09red/bta:532572%09red/bta:100137872%09red/bta:537782%09red/bta:282152%09red/bta:514090%09red/bta:534923%09red/bta:281876%09
Neuronal System	Reactome	R-BTA-112316	30	163	2.00438e-06	3.0644e-05	LIN7A|LIN7C|CASK|GABRA1|GNAI3|KCNA1|DLG3|CACNB3|NLGN1|KCNMA1|GNG12|CACNB4|KCNS2|LRRTM2|HOMER1|SLITRK6|KCNJ3|EPB41L3|SLITRK2|SLC38A2|GNB1|PRKAR1A|KCNH5|KCNJ2|HCN1|GRIK2|GJC1|GNG2|PRKACB|KCNV1	http://www.reactome.org/cgi-bin/eventbrowser_st_id?ST_ID=R-BTA-112316
Ubiquitin mediated proteolysis	KEGG PATHWAY	bta04120	27	140	2.98507e-06	4.46209e-05	UBE2Q1|BIRC6|BIRC3|UBE2D3|PPIL2|UBE3A|NEDD4|UBE2G1|FBXW7|BRCA1|CBLB|SIAH1|UBE4B|UBE2E3|UBE2E2|UBA6|RHOBTB1|MDM2|UBR5|UBE2H|UBE2K|CBL|PIAS2|UBE2Z|RNF7|MGRN1|UBE2W	http://www.genome.jp/kegg-bin/show_pathway?bta04120/bta:527418%09red/bta:281225%09red/bta:515595%09red/bta:525906%09red/bta:507781%09red/bta:534211%09red/bta:514386%09red/bta:540378%09red/bta:518834%09red/bta:613676%09red/bta:511467%09red/bta:540932%09red
Class I MHC mediated antigen processing & presentation	Reactome	R-BTA-983169	30	174	6.32888e-06	8.86798e-05	UBE2Q1|CBLL1|RNF34|CANX|ASB7|ASB5|UBE3A|WSB1|UBE2G1|RNF138|FBXW7|SIAH1|UBE2E2|CYBB|KLHL2|TRIM63|RNF19B|RNF19A|UBE2H|UBE2K|DZIP3|ZNRF2|FBXL3|UBA52|FBXO30|BLMH|RNF6|RNF7|MGRN1|UBE2W	http://www.reactome.org/cgi-bin/eventbrowser_st_id?ST_ID=R-BTA-983169
Antigen processing: Ubiquitination & Proteasome degradation	Reactome	R-BTA-983168	28	157	7.30332e-06	0.000100241	UBE2Q1|CBLL1|RNF34|ASB7|ASB5|UBE3A|WSB1|UBE2G1|RNF138|FBXW7|SIAH1|UBE2E2|KLHL2|TRIM63|RNF19B|RNF19A|UBE2H|UBE2K|DZIP3|ZNRF2|FBXL3|UBA52|FBXO30|BLMH|RNF6|RNF7|MGRN1|UBE2W	http://www.reactome.org/cgi-bin/eventbrowser_st_id?ST_ID=R-BTA-983168
Melanoma	KEGG PATHWAY	bta05218	18	73	7.66971e-06	0.000104963	PDGFA|PDGFRA|IGF1|HGF|PTEN|FGF17|NRAS|IGF1R|BAK1|FGF7|AKT2|AKT3|CDH1|MAPK1|MDM2|POLK|FGF2|MET	http://www.genome.jp/kegg-bin/show_pathway?bta05218/bta:280855%09red/bta:100300257%09red/bta:100137872%09red/bta:514090%09red/bta:281239%09red/bta:505908%09red/bta:616885%09red/bta:281161%09red/bta:282879%09red/bta:541218%09red/bta:506322%09red/bta:281848
Extracellular matrix organization	Reactome	R-BTA-1474244	21	97	7.99114e-06	0.000108834	ITGB1|TLL1|MMP16|TGFB2|BMP2|ADAMTS3|ADAMTS2|CAPN14|FBN2|SPARC|ADAM10|COL5A3|BMP7|COL1A2|KDR|COL1A1|ADAM19|COL2A1|FGF2|CTSV|CRTAP	http://www.reactome.org/cgi-bin/eventbrowser_st_id?ST_ID=R-BTA-1474244
Cytokine Signaling in Immune system	Reactome	R-BTA-1280215	38	256	9.29133e-06	0.000124734	IL7R|TNFSF11|SUMO1|PDGFRA|GAB1|MAPK10|IL1A|CNKSR2|KITLG|CANX|DLG3|PELI1|PPM1B|NRAS|MAP3K7|PDE3B|IL18R1|HBEGF|BRWD1|ARIH1|IFNG|PAQR3|CHUK|IL6R|PDE12|PTPN1|IL6ST|FGF2|RASA2|NKIRAS2|EIF4E2|TNFRSF1B|MAPK9|KL|UBA52|EREG|PTPRA|ABCE1	http://www.reactome.org/cgi-bin/eventbrowser_st_id?ST_ID=R-BTA-1280215
Tight junction	KEGG PATHWAY	bta04530	30	178	9.37018e-06	0.000125673	MYH10|PPP2R1B|MYH15|HSPA4|CACNA1D|PRKAG2|EPB41L4B|PRKAA2|MAPK10|WASL|PATJ|RAB8B|DLG3|NEDD4|TIAM1|CLDN1|MAPK9|ITGB1|DLG1|PRKAB2|PRKCE|PPP2R2C|RHOA|RAP2C|ACTN1|TJP1|EZR|PRKACB|YBX3|CDC42	http://www.genome.jp/kegg-bin/show_pathway?bta04530/bta:281574%09red/bta:533297%09red/bta:281577%09red/bta:532712%09red/bta:614242%09red/bta:282323%09red/bta:507781%09red/bta:782110%09red/bta:524770%09red/bta:504219%09red/bta:512665%09red/bta:414922%09red
T cell receptor signaling pathway	KEGG PATHWAY	bta04660	22	107	9.99894e-06	0.000133724	PPP3R1|AKT2|AKT3|MAPK10|DLG1|NRAS|MAP3K7|MAPK1|MAPK9|MALT1|CBLB|CD28|IFNG|CHUK|RHOA|NCK1|NCK2|VAV3|VAV2|GSK3B|PAK5|CDC42	http://www.genome.jp/kegg-bin/show_pathway?bta04660/bta:515718%09red/bta:532712%09red/bta:282321%09red/bta:525906%09red/bta:513432%09red/bta:100137872%09red/bta:536154%09red/bta:504994%09red/bta:534923%09red/bta:785291%09red/bta:790875%09red/bta:281050%09
MicroRNAs in cancer	KEGG PATHWAY	bta05206	39	270	1.24974e-05	0.000163568	RECK|MMP16|CRKL|ZFPM2|CDKN1B|BAK1|PDGFRA|BRCA1|PLCG2|MCL1|GLS|MDM2|FZD3|BMF|MET|CCNE2|EZR|NRAS|MARCKS|DNMT3B|PDGFA|SIRT1|DDIT4|PRKCE|BMI1|VEGFA|TNC|STAT3|RHOA|ZEB1|TGFB2|ZEB2|DICER1|CCND2|NOTCH2|VIM|PTEN|BMPR2|CREBBP	http://www.genome.jp/kegg-bin/show_pathway?bta05206/bta:513730%09red/bta:541141%09red/bta:337871%09red/bta:535183%09red/bta:281572%09red/bta:518180%09red/bta:282886%09red/bta:445419%09red/bta:505453%09red/bta:282301%09red/bta:514090%09red/bta:540664%09red
mTOR signaling pathway	KEGG PATHWAY	bta04150	27	154	1.38235e-05	0.000180089	NRAS|PRKAA2|AKT2|AKT3|FNIP1|FNIP2|FZD3|FZD4|FZD5|RPS6KB1|MAPK1|IGF1R|IGF1|DDIT4|CHUK|RPS6KA3|RHOA|EIF4B|EIF4E2|LRP6|SGK1|LRP5|GSK3B|PTEN|ATP6V1G1|DEPDC5|ATP6V1C2	http://www.genome.jp/kegg-bin/show_pathway?bta04150/bta:505850%09red/bta:538536%09red/bta:519920%09red/bta:521542%09red/bta:445416%09red/bta:445419%09red/bta:536328%09red/bta:100137872%09red/bta:511190%09red/bta:523042%09red/bta:404181%09red/bta:515854%09
Cellular senescence	KEGG PATHWAY	bta04218	28	166	1.80798e-05	0.000232318	TGFB2|PPP3R1|CACNA1D|RRAS2|RASSF5|FOXO3|HIPK2|FOXO1|AKT3|ATR|IL1A|VDAC2|MYBL2|CCNE2|NRAS|ETS1|CHEK1|CDKN2B|SIRT1|ZFP36L1|AKT2|MDM2|HIPK3|LIN9|CCND2|HIPK1|PTEN|MAPK1	http://www.genome.jp/kegg-bin/show_pathway?bta04218/bta:513678%09red/bta:519269%09red/bta:282321%09red/bta:504869%09red/bta:527124%09red/bta:540378%09red/bta:510420%09red/bta:512233%09red/bta:535530%09red/bta:100137872%09red/bta:534587%09red/bta:534923%09
@@Cellular Senescence	Reactome	R-BTA-2559583	10	91	0.0859431	0.202483	CDKN1B|BMI1|UBA52|ETS1|MAPK10|PHC3|CBX6|MAPK9|RNF2|UBN1	http://www.reactome.org/cgi-bin/eventbrowser_st_id?ST_ID=R-BTA-2559583
Integrin signalling pathway	PANTHER	P00034	18	79	1.92746e-05	0.000246101	ITGB1|RAP2C|ACTN1|ACTA1|MAP3K2|NTN4|ARPC1A|NRAS|RAP1B|ITGB8|ARF6|MAPK10|COL2A1|COL1A1|RHOB|RHOA|ACTC1|COL1A2	http://www.pantherdb.org/pathway/pathwayDiagram.jsp?catAccession=P00034
Generic Transcription Pathway	Reactome	R-BTA-212436	45	341	2.17874e-05	0.00027693	NR3C1|KCTD1|ASH2L|SUMO1|CDKN1B|PRKAA2|RORB|FOXO3|HIPK1|DEK|TEAD2|ELF1|CBX6|RNF34|ZNF599|CCNT2|BTG2|RBPJ|THRB|ZNF706|RORA|ZNF704|DDIT4|CBFB|ING2|PHC3|NR3C2|SIRT1|PRKAB2|SUPT16H|PRMT6|BMI1|PPM1D|SKIL|CTSV|NRBF2|TBL1XR1|SGK1|LMO2|UBA52|MED1|CREBBP|RNF2|TFAP2	http://www.reactome.org/cgi-bin/eventbrowser_st_id?ST_ID=R-BTA-212436
Breast cancer	KEGG PATHWAY	bta05224	26	150	2.35215e-05	0.000296035	TNFSF11|RPS6KB1|AKT2|AKT3|TCF7L2|BAK1|POLK|FZD3|FZD4|FZD5|NRAS|MAPK1|FGF17|BRCA1|IGF1R|IGF1|SP1|FGF7|HEY2|FGF2|HEY1|LRP6|LRP5|NOTCH2|GSK3B|PTEN	http://www.genome.jp/kegg-bin/show_pathway?bta05224/bta:513730%09red/bta:538619%09red/bta:538536%09red/bta:445416%09red/bta:445419%09red/bta:536328%09red/bta:100137872%09red/bta:534450%09red/bta:408005%09red/bta:404181%09red/bta:514090%09red/bta:534923%09
AMPK signaling pathway	KEGG PATHWAY	bta04152	23	123	2.41157e-05	0.000301629	PPP2R1B|ELAVL1|PRKAG2|IGF1R|PPARGC1A|FOXO3|RAB2A|AKT2|AKT3|RPS6KB1|MAP3K7|PFKM|RAB14|SIRT1|IGF1|PRKAB2|CREB1|PRKAA2|PPP2R2C|HMGCR|G6PC2|PFKFB2|FOXO1	http://www.genome.jp/kegg-bin/show_pathway?bta04152/bta:506544%09red/bta:281713%09red/bta:407159%09red/bta:782110%09red/bta:535530%09red/bta:100137872%09red/bta:338446%09red/bta:504219%09red/bta:512665%09red/bta:404181%09red/bta:100138150%09red/bta:538954
Pancreatic cancer	KEGG PATHWAY	bta05212	17	74	2.97283e-05	0.000363759	BCL2L1|TGFB2|STAT3|RALGDS|STAT1|RPS6KB1|CHUK|BAK1|MAPK1|AKT2|AKT3|VEGFA|MAPK10|MAPK9|POLK|RALA|CDC42	http://www.genome.jp/kegg-bin/show_pathway?bta05212/bta:510814%09red/bta:534069%09red/bta:538477%09red/bta:513723%09red/bta:281572%09red/bta:514090%09red/bta:532712%09red/bta:404181%09red/bta:508541%09red/bta:541218%09red/bta:281073%09red/bta:100137872%09
Gastric cancer	KEGG PATHWAY	bta05226	26	153	3.16899e-05	0.000385419	TGFB2|NRAS|GAB1|FGF7|AKT2|AKT3|BAK1|POLK|FZD3|FZD4|FZD5|CCNE2|RPS6KB1|MAPK1|CDKN1B|CDH1|FGF17|CDKN2B|HGF|FGF2|CTNNA3|LRP6|LRP5|TCF7L2|GSK3B|MET	http://www.genome.jp/kegg-bin/show_pathway?bta05226/bta:100300257%09red/bta:538536%09red/bta:780777%09red/bta:445416%09red/bta:527124%09red/bta:445419%09red/bta:536328%09red/bta:100137872%09red/bta:534450%09red/bta:404181%09red/bta:514090%09red/bta:534923
Innate Immune System	Reactome	R-BTA-168249	54	449	3.61801e-05	0.000432933	BCL2L1|AGL|PPP3R1|RAP2C|DYNLT1|MLEC|TSPAN14|RAP1B|ADAM10|SNAP25|MAPK10|WASL|GLIPR1|ATP7A|ACTR10|PSMA5|SUGT1|PELI1|CAND1|RAB5B|CPNE3|SCAMP1|NRAS|MAP3K7|RAB18|GOLGA7|PSMC2|MAPK9|RAB14|MALT1|CRISPLD2|DDX3X|CAPZA2|DSN1|ENPP4|FAF2|CHUK|CYBB|BAIAP2|GDI2|RHOA|NK	http://www.reactome.org/cgi-bin/eventbrowser_st_id?ST_ID=R-BTA-168249
Morphine addiction	KEGG PATHWAY	bta05032	19	92	3.73081e-05	0.000444843	KCNJ3|GNAI3|PDE8A|GABRG2|PDE1A|GNB1|GNG12|PDE3B|PDE4B|CACNA1B|GNG2|PRKACB|PDE4D|GABRB2|GABRB3|GABRA1|PDE10A|PDE8B|PDE3A	http://www.genome.jp/kegg-bin/show_pathway?bta05032/bta:536636%09red/bta:107131388%09red/bta:780973%09red/bta:506061%09red/bta:526088%09red/bta:286850%09red/bta:506787%09red/bta:281203%09red/bta:529593%09red/bta:282323%09red/bta:281201%09red/bta:533323%09
Insulin signaling pathway	KEGG PATHWAY	bta04910	24	137	4.10318e-05	0.000483599	CRKL|NRAS|PRKAG2|PRKAA2|G6PC2|FOXO1|AKT3|MAPK10|SORBS1|PPP1R3C|RPS6KB1|PPARGC1A|PDE3B|MAPK1|MAPK9|CBLB|PRKAB2|PRKAR1A|PTPN1|EIF4E2|AKT2|CBL|GSK3B|PRKACB	http://www.genome.jp/kegg-bin/show_pathway?bta04910/bta:527418%09red/bta:518180%09red/bta:534125%09red/bta:282323%09red/bta:525906%09red/bta:539466%09red/bta:615074%09red/bta:100137872%09red/bta:338446%09red/bta:504219%09red/bta:512665%09red/bta:404181%09
Longevity regulating pathway - multiple species	KEGG PATHWAY	bta04213	15	62	5.18784e-05	0.000596474	HSPA2|SIRT1|IGF1|IGF1R|ATG5|NRAS|PRKAG2|RPS6KB1|FOXO1|PRKAA2|FOXO3|AKT2|AKT3|PRKACB|PRKAB2	http://www.genome.jp/kegg-bin/show_pathway?bta04213/bta:535530%09red/bta:100137872%09red/bta:506322%09red/bta:504219%09red/bta:281239%09red/bta:512665%09red/bta:404181%09red/bta:281827%09red/bta:282323%09red/bta:281848%09red/bta:538954%09red/bta:534923%09
cAMP signaling pathway	KEGG PATHWAY	bta04024	33	228	5.42345e-05	0.000620024	VAV2|ATP2A2|GRIA3|GRIA1|RAP1B|AKT2|AKT3|MAPK10|ADCYAP1|BDNF|GNAI3|PDE3A|PDE3B|TIAM1|MAPK1|MAPK9|RRAS2|GCG|CREB1|CACNA1D|ATP1B1|ATP2B1|RHOA|ATP2B2|PDE10A|ATP2B4|VAV3|NPY1R|PRKACB|HTR1E|PDE4B|PDE4D|CREBBP	http://www.genome.jp/kegg-bin/show_pathway?bta04024/bta:515718%09red/bta:100124505%09red/bta:537631%09red/bta:281713%09red/bta:519269%09red/bta:613800%09red/bta:539521%09red/bta:282641%09red/bta:505453%09red/bta:536636%09red/bta:100137872%09red/bta:534626
Prostate cancer	KEGG PATHWAY	bta05215	19	95	5.4493e-05	0.000621467	PDGFA|PDGFRA|IGF1|IGF1R|MAPK1|CCNE2|CDKN1B|NRAS|AKT2|CREB1|CHUK|PTEN|FOXO1|AKT3|TCF7L2|ETV5|MDM2|GSK3B|CREBBP	http://www.genome.jp/kegg-bin/show_pathway?bta05215/bta:281239%09red/bta:100137872%09red/bta:541166%09red/bta:790875%09red/bta:281713%09red/bta:505908%09red/bta:505453%09red/bta:281073%09red/bta:506322%09red/bta:281848%09red/bta:540481%09red/bta:538436%09
cGMP-PKG signaling pathway	KEGG PATHWAY	bta04022	27	169	5.80273e-05	0.000660172	ATP2A2|CACNA1D|AKT2|AKT3|VDAC2|GNAI3|PPP3R1|PDE3A|KCNMA1|PDE3B|GUCY1A2|PRKG1|SLC8A1|PDE5A|SRF|MYLK4|PRKCE|CREB1|ATP1B1|ATP2B1|RHOA|ATP2B2|ATP2B4|GNAQ|MEF2A|MAPK1|ATF2	http://www.genome.jp/kegg-bin/show_pathway?bta04022/bta:519758%09red/bta:281713%09red/bta:282321%09red/bta:281972%09red/bta:613800%09red/bta:539521%09red/bta:540568%09red/bta:536654%09red/bta:536636%09red/bta:100137872%09red/bta:282641%09red/bta:533039%09
Relaxin signaling pathway	KEGG PATHWAY	bta04926	23	132	6.31931e-05	0.000711478	COL4A1|AKT2|AKT3|MAPK10|COL3A1|GNAI3|NRAS|GNG12|MAPK1|COL1A2|MAPK9|COL1A1|GNB1|CREB1|COL4A6|COL4A5|COL4A4|VEGFA|VEGFC|GNG2|PRKACB|COL4A3|ATF2	http://www.genome.jp/kegg-bin/show_pathway?bta04926/bta:281572%09red/bta:282191%09red/bta:281713%09red/bta:510833%09red/bta:281201%09red/bta:539521%09red/bta:282323%09red/bta:511602%09red/bta:100137872%09red/bta:534923%09red/bta:317711%09red/bta:506322%09
Wnt signaling pathway	KEGG PATHWAY	bta04310	26	161	6.73936e-05	0.000754551	RYK|PPP3R1|WIF1|MAPK10|PRICKLE1|FZD3|FZD4|FZD5|MAP3K7|SOX17|CSNK1E|NLK|MAPK9|SIAH1|DAAM1|SENP2|RHOA|ROR1|LRP6|TBL1XR1|LRP5|CCND2|TCF7L2|GSK3B|PRKACB|CREBBP	http://www.genome.jp/kegg-bin/show_pathway?bta04310/bta:538536%09red/bta:534010%09red/bta:282321%09red/bta:282323%09red/bta:445419%09red/bta:505453%09red/bta:536328%09red/bta:534450%09red/bta:614346%09red/bta:785152%09red/bta:783965%09red/bta:507204%09red
@@Wnt signaling pathway	PANTHER	P00057	18	116	0.00125529	0.00909743	CREBBP|ACTA1|LRP6|GNAQ|PPP3R1|TBL1XR1|ACTC1|GNB1|SMAD1|GNG12|PCDH7|GNG2|FZD5|FZD4|PCDH18|MAP3K7|ACVR1C|CTNNA3	http://www.pantherdb.org/pathway/pathwayDiagram.jsp?catAccession=P00057
Colorectal cancer	KEGG PATHWAY	bta05210	18	89	7.47993e-05	0.000828908	TGFB2|PMAIP1|RALGDS|MSH6|RPS6KB1|BAK1|NRAS|TCF7L2|GSK3B|AKT2|AKT3|MAPK10|EREG|MAPK1|RHOA|MAPK9|POLK|RALA	http://www.genome.jp/kegg-bin/show_pathway?bta05210/bta:100137872%09red/bta:514090%09red/bta:534069%09red/bta:538477%09red/bta:513723%09red/bta:100295476%09red/bta:540526%09red/bta:790875%09red/bta:404181%09red/bta:100296226%09red/bta:541218%09red/bta:506
SUMOylation	Reactome	R-BTA-2990846	17	81	7.9077e-05	0.000871517	NR3C2|NR3C1|PHC3|SUMO1|TDG|SENP5|THRB|BMI1|RORA|NUP210|SENP1|SENP2|SATB2|SATB1|RNF2|TFAP2C|ING2	http://www.reactome.org/cgi-bin/eventbrowser_st_id?ST_ID=R-BTA-2990846
Insulin resistance	KEGG PATHWAY	bta04931	20	110	0.000111676	0.00117301	RPS6KA3|PPP1R3C|STAT3|PRKCE|PRKAG2|RPS6KB1|PPARGC1A|CREB1|PRKAA2|GSK3B|PTEN|AKT2|AKT3|MAPK10|PPARGC1B|FOXO1|PRKAB2|PTPN1|MAPK9|G6PC2	http://www.genome.jp/kegg-bin/show_pathway?bta04931/bta:514750%09red/bta:505012%09red/bta:338446%09red/bta:511190%09red/bta:790875%09red/bta:504219%09red/bta:281713%09red/bta:512665%09red/bta:404181%09red/bta:540786%09red/bta:508541%09red/bta:534125%09red
Integration of energy metabolism	Reactome	R-BTA-163685	13	52	0.000121859	0.00127053	PRKAB2|GNAQ|GCG|ACSL3|CACNB3|CACNB2|GNB1|PRKAA2|GNG12|CACNA1D|GNG2|PRKAR1A|PRKACB	http://www.reactome.org/cgi-bin/eventbrowser_st_id?ST_ID=R-BTA-163685
Inflammation mediated by chemokine and cytokine signaling pathway	PANTHER	P00031	18	93	0.000121861	0.00127053	ITGB1|MYH10|ACTA1|STAT3|GNAQ|IFNG|ACTC1|ARPC1A|NRAS|CHUK|GNG12|AKT3|GNG2|CASK|PRKACB|PAK5|RHOA|GNAI3	http://www.pantherdb.org/pathway/pathwayDiagram.jsp?catAccession=P00031
Circadian rhythm	KEGG PATHWAY	bta04710	10	31	0.000130181	0.00134533	PRKAB2|CLOCK|FBXL3|PRKAG2|RORB|RORA|PRKAA2|PER3|CSNK1E|CREB1	http://www.genome.jp/kegg-bin/show_pathway?bta04710/bta:540712%09red/bta:528382%09red/bta:504219%09red/bta:281713%09red/bta:100300400%09red/bta:768234%09red/bta:538954%09red/bta:614154%09red/bta:535597%09red/bta:512665%09red
Extra-nuclear estrogen signaling	Reactome	R-BTA-9009391	11	38	0.000135732	0.00139962	NRAS|GNB1|UHMK1|GNG12|FOXO3|HBEGF|GNG2|EREG|CDKN1B|CAV2|GNAI3	http://www.reactome.org/cgi-bin/eventbrowser_st_id?ST_ID=R-BTA-9009391
Fc gamma R-mediated phagocytosis	KEGG PATHWAY	bta04666	18	94	0.000137076	0.00141245	PLPP3|CRKL|DOCK2|PRKCE|VAV3|VAV2|RPS6KB1|ARF6|AKT3|PLCG2|AKT2|MARCKS|WASL|MAPK1|CDC42|ARPC1A|ASAP2|CFL2	http://www.genome.jp/kegg-bin/show_pathway?bta04666/bta:515718%09red/bta:100337091%09red/bta:281577%09red/bta:521961%09red/bta:532712%09red/bta:518180%09red/bta:618009%09red/bta:404181%09red/bta:100294979%09red/bta:613548%09red/bta:100137872%09red/bta:507
Apelin signaling pathway	KEGG PATHWAY	bta04371	23	140	0.00013794	0.00142031	NRAS|RRAS2|PRKAA2|AKT2|AKT3|GNAI3|EGR1|RPS6KB1|PPARGC1A|GNG12|PDE3B|MAPK1|SLC8A1|PRKAG2|PRKAB2|GNB1|MYLK4|PRKCE|CDH1|GNAQ|MEF2A|GNG2|PRKACB	http://www.genome.jp/kegg-bin/show_pathway?bta04371/bta:519269%09red/bta:281203%09red/bta:282323%09red/bta:539521%09red/bta:536654%09red/bta:100137872%09red/bta:338446%09red/bta:504219%09red/bta:512665%09red/bta:404181%09red/bta:533323%09red/bta:407231%09
Viral carcinogenesis	KEGG PATHWAY	bta05203	33	241	0.000139344	0.00143163	PMAIP1|CDKN1B|KAT2B|IL6ST|GTF2A1|REL|SRF|MDM2|DLG1|GTF2E1|STAT3|EGR2|EGR3|RBPJ|UBE3A|NRAS|MAPK1|RANBP1|YWHAG|CHEK1|CDKN2B|DDX3X|CREB1|RHOA|RASA2|ACTN1|CCND2|BAK1|CCNE2|PRKACB|ATF2|CREBBP|CDC42	http://www.genome.jp/kegg-bin/show_pathway?bta05203/bta:513678%09red/bta:532712%09red/bta:281713%09red/bta:282323%09red/bta:527124%09red/bta:540378%09red/bta:505453%09red/bta:524770%09red/bta:533039%09red/bta:540525%09red/bta:286862%09red/bta:533136%09red
p53 signaling pathway	KEGG PATHWAY	bta04115	16	77	0.000140347	0.00144088	BCL2L1|PPM1D|PMAIP1|SESN1|SESN3|CCNE2|CCND2|AIFM2|PTEN|IGF1|ATR|SIAH1|GORAB|MDM2|APAF1|CHEK1	http://www.genome.jp/kegg-bin/show_pathway?bta04115/bta:281239%09red/bta:513678%09red/bta:515914%09red/bta:514005%09red/bta:540786%09red/bta:537782%09red/bta:100296226%09red/bta:282152%09red/bta:534655%09red/bta:504869%09red/bta:538436%09red/bta:538226%09
Yersinia infection	KEGG PATHWAY	bta05135	22	131	0.000144555	0.00147442	PTK2|CRKL|SKAP2|MAP3K7|AKT2|AKT3|MAPK10|WASL|ARF6|MAPK1|MAPK9|ITGB1|CHUK|RHOA|RPS6KA3|VAV3|VAV2|GSK3B|GIT2|BAIAP2|WIPF1|CDC42	http://www.genome.jp/kegg-bin/show_pathway?bta05135/bta:515718%09red/bta:281577%09red/bta:506270%09red/bta:532712%09red/bta:518180%09red/bta:507837%09red/bta:100137872%09red/bta:511190%09red/bta:790875%09red/bta:534923%09red/bta:281876%09red/bta:540304%09
Parathyroid hormone synthesis, secretion and action	KEGG PATHWAY	bta04928	19	104	0.000155235	0.00156299	TNFSF11|LRP6|GNAQ|LRP5|SP1|EGR1|MMP16|CREB1|PTHLH|HBEGF|MEF2A|MAPK1|PRKACB|RHOA|KL|PDE4D|GNAI3|PDE4B|ATF2	http://www.genome.jp/kegg-bin/show_pathway?bta04928/bta:536328%09red/bta:286767%09red/bta:540741%09red/bta:513836%09red/bta:534450%09red/bta:327672%09red/bta:281713%09red/bta:784635%09red/bta:407231%09red/bta:282323%09red/bta:522921%09red/bta:407125%09red
Glucagon signaling pathway	KEGG PATHWAY	bta04922	19	104	0.000155235	0.00156299	SIRT1|PDHA1|PRKAB2|GNAQ|PPP3R1|PRKAA2|PRKAG2|PFKM|CREB1|PPARGC1A|GCG|AKT2|AKT3|PRKACB|FOXO1|PDE3B|G6PC2|CREBBP|ATF2	http://www.genome.jp/kegg-bin/show_pathway?bta04922/bta:100137872%09red/bta:505012%09red/bta:506544%09red/bta:407109%09red/bta:504219%09red/bta:281713%09red/bta:512665%09red/bta:533323%09red/bta:505453%09red/bta:282321%09red/bta:282323%09red/bta:509827%09
Hippo signaling pathway	KEGG PATHWAY	bta04390	24	151	0.000156181	0.00157139	PPP2R1B|SMAD1|LATS1|TEAD2|PATJ|DLG1|DLG3|FZD3|FZD4|FZD5|CSNK1E|CDH1|YWHAG|PPP2R2C|STK3|SNAI2|TGFB2|CTNNA3|BMP7|BMP2|CCND2|TCF7L2|GSK3B|BMPR2	http://www.genome.jp/kegg-bin/show_pathway?bta04390/bta:100125315%09red/bta:538536%09red/bta:780777%09red/bta:445416%09red/bta:615037%09red/bta:445419%09red/bta:286862%09red/bta:782110%09red/bta:540488%09red/bta:100138150%09red/bta:540481%09red/bta:615414
Dopaminergic synapse	KEGG PATHWAY	bta04728	22	132	0.00015914	0.00159775	PPP2R1B|CLOCK|GRIA3|GRIA1|AKT2|AKT3|MAPK10|GNAI3|CACNA1B|CACNA1D|GNG12|MAPK9|PRKACB|GNB1|PPP2R2C|CREB1|KCNJ3|GNAQ|GSK3B|GNG2|SCN1A|ATF2	http://www.genome.jp/kegg-bin/show_pathway?bta04728/bta:281713%09red/bta:281203%09red/bta:282323%09red/bta:539521%09red/bta:536654%09red/bta:782110%09red/bta:100137872%09red/bta:534626%09red/bta:100300400%09red/bta:529590%09red/bta:100138150%09red/bta:534
Cellular responses to external stimuli	Reactome	R-BTA-8953897	35	265	0.000167102	0.00166464	NR3C1|HIF3A|MT2A|HSPA4|CDKN1B|PRKAA2|MAPK10|CBX6|RB1CC1|DCTN6|UBN1|HSPH1|DYNC1I1|ACTR10|UVRAG|ETS1|PHC3|MAPK9|NUP210|NR3C2|SIRT1|PRKAB2|ACTR1A|WIPI2|BMI1|CYBB|TUBB2A|HSPA13|CAPZA2|ERO1A|UBA52|GPX7|GPX8|RNF2|CREBBP	http://www.reactome.org/cgi-bin/eventbrowser_st_id?ST_ID=R-BTA-8953897
ECM-receptor interaction	KEGG PATHWAY	bta04512	17	87	0.000168376	0.00167378	ITGB1|LAMA2|FRAS1|TNC|ITGB8|THBS2|COL9A1|COL4A6|COL4A5|COL4A4|COL4A3|DAG1|COL4A1|COL1A1|COL1A2|LAMC1|COL2A1	http://www.genome.jp/kegg-bin/show_pathway?bta04512/bta:511602%09red/bta:532572%09red/bta:536286%09red/bta:540664%09red/bta:407107%09red/bta:317711%09red/bta:281439%09red/bta:282191%09red/bta:107131184%09red/bta:100138434%09red/bta:282195%09red/bta:523526
Human T-cell leukemia virus 1 infection	KEGG PATHWAY	bta05166	32	234	0.000178099	0.00176174	BCL2L1|TGFB2|PPP3R1|CCNE2|KAT2B|AKT2|AKT3|MAPK10|VDAC2|CANX|DLG1|EGR2|EGR1|NRAS|ETS2|ETS1|PTTG1|MAPK9|RANBP1|MAPK1|CHEK1|CDKN2B|SRF|CHUK|CREB1|CCND2|PTEN|ELK4|PRKACB|ATR|CREBBP|ATF2	http://www.genome.jp/kegg-bin/show_pathway?bta05166/bta:513678%09red/bta:281713%09red/bta:540313%09red/bta:282321%09red/bta:100297981%09red/bta:282323%09red/bta:504869%09red/bta:527124%09red/bta:505453%09red/bta:100137872%09red/bta:282152%09red/bta:533039
Renal cell carcinoma	KEGG PATHWAY	bta05211	15	71	0.000191691	0.00187384	TGFB2|CRKL|MAPK1|NRAS|RAP1B|GAB1|AKT3|MET|AKT2|ETS1|VEGFA|HGF|PAK5|CREBBP|CDC42	http://www.genome.jp/kegg-bin/show_pathway?bta05211/bta:280855%09red/bta:327672%09red/bta:100137872%09red/bta:281572%09red/bta:532712%09red/bta:518180%09red/bta:540085%09red/bta:540313%09red/bta:513432%09red/bta:534069%09red/bta:506322%09red/bta:327708%09
Adipocytokine signaling pathway	KEGG PATHWAY	bta04920	15	72	0.000218803	0.00209955	TNFRSF1B|STAT3|ACSL3|PRKAG2|ACSL6|PPARGC1A|ACSL4|PRKAA2|AKT2|AKT3|MAPK10|CHUK|PRKAB2|MAPK9|G6PC2	http://www.genome.jp/kegg-bin/show_pathway?bta04920/bta:338033%09red/bta:506059%09red/bta:100137872%09red/bta:505012%09red/bta:338446%09red/bta:504219%09red/bta:538954%09red/bta:512665%09red/bta:281073%09red/bta:536628%09red/bta:537631%09red/bta:534125%09
Thyroid hormone signaling pathway	KEGG PATHWAY	bta04919	20	118	0.000255108	0.00238146	NCOA2|STAT1|ATP2A2|NRAS|PFKFB2|THRB|KAT2B|NOTCH2|ATP1B1|PLCG2|AKT2|AKT3|MED1|PRKACB|FOXO1|MAPK1|MDM2|GSK3B|CREBBP|MED12	http://www.genome.jp/kegg-bin/show_pathway?bta04919/bta:513730%09red/bta:100337091%09red/bta:100137872%09red/bta:506322%09red/bta:287019%09red/bta:790875%09red/bta:788329%09red/bta:540378%09red/bta:505453%09red/bta:510814%09red/bta:520734%09red/bta:282323
Amoebiasis	KEGG PATHWAY	bta05146	18	100	0.000268364	0.00249036	ACTN1|PTK2|GNAQ|RAB5B|IFNG|PRKACB|LAMA2|SERPINB9|COL4A6|COL4A5|COL4A4|COL4A3|COL4A1|COL1A1|COL3A1|COL1A2|LAMC1|TGFB2	http://www.genome.jp/kegg-bin/show_pathway?bta05146/bta:511602%09red/bta:532572%09red/bta:534069%09red/bta:407107%09red/bta:317711%09red/bta:506270%09red/bta:524513%09red/bta:282191%09red/bta:539150%09red/bta:281237%09red/bta:523526%09red/bta:510833%09red
Angiogenesis	PANTHER	P00005	15	74	0.000283093	0.00259797	PDGFRA|STAT3|FZD5|RBPJ|NCK1|NRAS|AKT3|ETS1|MAPK10|ANGPT2|RHOB|RHOA|FGF2|KDR|PRKD3	http://www.pantherdb.org/pathway/pathwayDiagram.jsp?catAccession=P00005
HIF-1 signaling pathway	KEGG PATHWAY	bta04066	19	110	0.000291757	0.00266534	CYBB|IGF1R|PDHA1|STAT3|IFNG|CDKN1B|RPS6KB1|AKT2|IL6R|AKT3|PLCG2|PFKM|EIF4E2|VEGFA|IGF1|ANGPT2|MAPK1|ANGPT1|CREBBP	http://www.genome.jp/kegg-bin/show_pathway?bta04066/bta:100337091%09red/bta:281239%09red/bta:100137872%09red/bta:506544%09red/bta:281572%09red/bta:407109%09red/bta:281237%09red/bta:404181%09red/bta:508541%09red/bta:281112%09red/bta:281848%09red/bta:282141
Degradation of the extracellular matrix	Reactome	R-BTA-1474228	10	35	0.000296764	0.00270232	TLL1|MMP16|CAPN14|FBN2|ADAM10|COL5A3|COL1A2|COL1A1|COL2A1|CTSV	http://www.reactome.org/cgi-bin/eventbrowser_st_id?ST_ID=R-BTA-1474228
Hypertrophic cardiomyopathy (HCM)	KEGG PATHWAY	bta05410	17	92	0.000300339	0.00272606	ITGB1|ITGB8|IGF1|DMD|ATP2A2|CACNB3|ACTC1|PRKAG2|LAMA2|PRKAA2|CACNB4|DAG1|CACNB2|SLC8A1|PRKAB2|CACNA1D|TGFB2	http://www.genome.jp/kegg-bin/show_pathway?bta05410/bta:337925%09red/bta:100138434%09red/bta:281239%09red/bta:533219%09red/bta:282160%09red/bta:282161%09red/bta:281439%09red/bta:504219%09red/bta:536286%09red/bta:512665%09red/bta:534069%09red/bta:540568%09
Signaling by Interleukins	Reactome	R-BTA-449147	28	200	0.000312205	0.00283194	IL7R|PDGFRA|GAB1|MAPK10|IL1A|PDE3B|CANX|DLG3|PELI1|NRAS|MAP3K7|CNKSR2|IL18R1|HBEGF|BRWD1|PAQR3|CHUK|IL6R|KITLG|IL6ST|FGF2|RASA2|NKIRAS2|MAPK9|KL|UBA52|EREG|PTPRA	http://www.reactome.org/cgi-bin/eventbrowser_st_id?ST_ID=R-BTA-449147
Cellular responses to stress	Reactome	R-BTA-2262752	29	212	0.000347587	0.0031069	HIF3A|HSPA4|CDKN1B|NR3C1|MAPK10|CBX6|DCTN6|UBN1|HSPH1|DYNC1I1|ACTR10|ETS1|PHC3|MAPK9|NUP210|NR3C2|SIRT1|GPX7|BMI1|CYBB|TUBB2A|HSPA13|CAPZA2|ERO1A|UBA52|ACTR1A|GPX8|RNF2|CREBBP	http://www.reactome.org/cgi-bin/eventbrowser_st_id?ST_ID=R-BTA-2262752
Beta1 adrenergic receptor signaling pathway	PANTHER	P04377	9	29	0.000356824	0.00317537	SNAP25|CACNB3|CACNB2|GNB1|GNG12|CACNB4|GNG2|PRKACB|CACNA1D	http://www.pantherdb.org/pathway/pathwayDiagram.jsp?catAccession=P04377
Arrhythmogenic right ventricular cardiomyopathy (ARVC)	KEGG PATHWAY	bta05412	15	76	0.000363022	0.00322037	ITGB1|LAMA2|DMD|ATP2A2|CACNB3|CACNB2|CACNA1D|TCF7L2|CACNB4|DSG2|DAG1|ITGB8|SLC8A1|CDH2|CTNNA3	http://www.genome.jp/kegg-bin/show_pathway?bta05412/bta:337925%09red/bta:100138434%09red/bta:537655%09red/bta:282160%09red/bta:282161%09red/bta:281439%09red/bta:508151%09red/bta:536286%09red/bta:281062%09red/bta:780777%09red/bta:540568%09red/bta:327667%09
Endocrine resistance	KEGG PATHWAY	bta01522	17	94	0.000374101	0.00330622	IGF1R|PTK2|RPS6KB1|SP1|NRAS|NOTCH2|HBEGF|AKT2|AKT3|MAPK10|IGF1|PRKACB|CDKN1B|MAPK1|MDM2|MAPK9|MED1	http://www.genome.jp/kegg-bin/show_pathway?bta01522/bta:513730%09red/bta:281239%09red/bta:281848%09red/bta:540741%09red/bta:506322%09red/bta:506270%09red/bta:404181%09red/bta:100137872%09red/bta:520734%09red/bta:282323%09red/bta:522921%09red/bta:537631%09
Glutamatergic synapse	KEGG PATHWAY	bta04724	19	113	0.000392831	0.00345868	KCNJ3|GLS|GNAQ|PPP3R1|SLC38A2|GRIA3|SLC17A6|GRIA1|GNB1|GNG12|GNAI3|TRPC1|GNG2|PRKACB|HOMER1|MAPK1|GRM7|CACNA1D|GRIK2	http://www.genome.jp/kegg-bin/show_pathway?bta04724/bta:282321%09red/bta:100125225%09red/bta:534626%09red/bta:535362%09red/bta:327672%09red/bta:282100%09red/bta:286850%09red/bta:535311%09red/bta:525335%09red/bta:281203%09red/bta:526088%09red/bta:282323%09
Retrograde endocannabinoid signaling	KEGG PATHWAY	bta04723	23	152	0.000395766	0.00348234	NDUFB6|GRIA1|MAPK10|GABRA1|GNAI3|CNR1|CACNA1B|CACNA1D|GNG12|MAPK1|GABRG2|GRIA3|MAPK9|NDUFA5|GNB1|GABRB2|GABRB3|KCNJ3|GNAQ|SLC17A6|NDUFS2|GNG2|PRKACB	http://www.genome.jp/kegg-bin/show_pathway?bta04723/bta:281203%09red/bta:282323%09red/bta:539521%09red/bta:536654%09red/bta:282240%09red/bta:534626%09red/bta:529593%09red/bta:327714%09red/bta:327665%09red/bta:100125225%09red/bta:537631%09red/bta:534125%09
Signaling by VEGF	Reactome	R-BTA-194138	11	44	0.000398792	0.00350241	NCK1|NCK2|ABI2|CYBB|SHB|KDR|VEGFC|PRKACB|BAIAP2|RHOA|NRP2	http://www.reactome.org/cgi-bin/eventbrowser_st_id?ST_ID=R-BTA-194138
Beta2 adrenergic receptor signaling pathway	PANTHER	P04378	9	30	0.000439122	0.00377661	SNAP25|CACNB3|CACNB2|GNB1|GNG12|CACNB4|GNG2|PRKACB|CACNA1D	http://www.pantherdb.org/pathway/pathwayDiagram.jsp?catAccession=P04378
Signaling by TGF-beta family members	Reactome	R-BTA-9006936	9	30	0.000439122	0.00377661	ACVR2A|BMP2|ACVR1C|NOG|SMAD1|UBA52|SKIL|RHOA|MTMR4	http://www.reactome.org/cgi-bin/eventbrowser_st_id?ST_ID=R-BTA-9006936
Hepatocellular carcinoma	KEGG PATHWAY	bta05225	25	174	0.000453511	0.00387906	BCL2L1|TGFB2|RPS6KB1|GAB1|PLCG2|AKT2|AKT3|BAK1|POLK|FZD3|FZD4|FZD5|MET|NRAS|MAPK1|IGF1R|ARID2|SMARCD1|HGF|LRP6|LRP5|TCF7L2|GSK3B|PTEN|PBRM1	http://www.genome.jp/kegg-bin/show_pathway?bta05225/bta:538536%09red/bta:445416%09red/bta:517876%09red/bta:445419%09red/bta:282152%09red/bta:536328%09red/bta:100137872%09red/bta:534450%09red/bta:404181%09red/bta:514090%09red/bta:534923%09red/bta:540481%09
Asparagine N-linked glycosylation	Reactome	R-BTA-446203	22	144	0.00046615	0.00396551	ST6GAL2|ACTR10|DOLPP1|ARF5|DCTN6|TMED2|DYNC1I1|TMED9|NAPG|PPP6C|NAPB|NANP|B4GALT6|STX17|MGAT2|FPGT|TUBB2A|CAPZA2|ST8SIA2|UBA52|MAN1C1|ACTR1A	http://www.reactome.org/cgi-bin/eventbrowser_st_id?ST_ID=R-BTA-446203
EGF receptor signaling pathway	PANTHER	P00018	12	53	0.00047866	0.00404994	STAT3|MAP3K2|RRAS2|NRAS|GAB1|SPRY3|HBEGF|AKT3|MAPK10|YWHAG|RASA2|PRKD3	http://www.pantherdb.org/pathway/pathwayDiagram.jsp?catAccession=P00018
Protein processing in endoplasmic reticulum	KEGG PATHWAY	bta04141	24	165	0.000498806	0.00418771	HSPA2|BAK1|UBE2D3|SEC62|MAPK10|ERO1A|CANX|HERPUD1|HSPH1|UBE2G1|MAPK9|SEL1L|DNAJC10|PDIA6|SEC24D|MAN1C1|LMAN1|STT3B|SEC23A|UBE4B|EIF2AK3|YOD1|DNAJC3|SEC61A1	http://www.genome.jp/kegg-bin/show_pathway?bta04141/bta:100125317%09red/bta:326583%09red/bta:614959%09red/bta:511649%09red/bta:613927%09red/bta:615012%09red/bta:535820%09red/bta:613676%09red/bta:505064%09red/bta:514090%09red/bta:613577%09red/bta:538938%09
Fluid shear stress and atherosclerosis	KEGG PATHWAY	bta05418	22	145	0.000506694	0.00425141	NCF2|PTK2|PDGFA|SUMO1|PRKAA2|AKT2|AKT3|MAPK10|IL1A|CAV2|MAP3K7|MAPK9|KDR|ACVR2A|IFNG|CHUK|GPC1|VEGFA|RHOA|CTSV|MEF2A|BMPR2	http://www.genome.jp/kegg-bin/show_pathway?bta05418/bta:281346%09red/bta:281572%09red/bta:506270%09red/bta:407170%09red/bta:281598%09red/bta:100137872%09red/bta:407231%09red/bta:518114%09red/bta:538954%09red/bta:534923%09red/bta:493642%09red/bta:614967%09
Signaling by Non-Receptor Tyrosine Kinases	Reactome	R-BTA-9006927	8	24	0.000510964	0.00427705	CDKN1B|SFPQ|KHDRBS3|HBEGF|UBA52|EREG|PTPN1|RHOA	http://www.reactome.org/cgi-bin/eventbrowser_st_id?ST_ID=R-BTA-9006927
Signaling by PTK6	Reactome	R-BTA-8848021	8	24	0.000510964	0.00427705	CDKN1B|SFPQ|KHDRBS3|HBEGF|UBA52|EREG|PTPN1|RHOA	http://www.reactome.org/cgi-bin/eventbrowser_st_id?ST_ID=R-BTA-8848021
Collagen formation	Reactome	R-BTA-1474290	9	31	0.000536401	0.00444295	TLL1|ADAMTS3|ADAMTS2|COL5A3|COL1A2|COL1A1|COL2A1|CTSV|CRTAP	http://www.reactome.org/cgi-bin/eventbrowser_st_id?ST_ID=R-BTA-1474290
Vesicle-mediated transport	Reactome	R-BTA-5653656	37	308	0.000580319	0.00472842	ACTR10|WASL|AP1S3|DCTN6|RAB18|MSR1|UBAP1|FZD4|TMED2|HBEGF|DYNC1I1|ARF6|TMED9|NAPG|GOLGA1|SPARC|PPP6C|NAPB|VTA1|RAB14|ACTR1A|RAB5B|TMF1|ALS2|DENND5B|GDI2|TUBB2A|CAPZA2|SCOC|ARPC1A|GJC1|UBA52|ARF5|EREG|STX17|CLVS2|VPS54	http://www.reactome.org/cgi-bin/eventbrowser_st_id?ST_ID=R-BTA-5653656
Collagen biosynthesis and modifying enzymes	Reactome	R-BTA-1650814	8	25	0.000638916	0.00512587	TLL1|ADAMTS3|ADAMTS2|COL5A3|COL1A2|COL1A1|COL2A1|CRTAP	http://www.reactome.org/cgi-bin/eventbrowser_st_id?ST_ID=R-BTA-1650814
Choline metabolism in cancer	KEGG PATHWAY	bta05231	17	100	0.000696491	0.00552522	SLC44A1|PDGFRA|RALGDS|RPS6KB1|SP1|NRAS|PLPP3|AKT2|AKT3|MAPK10|WASL|DGKH|MAPK1|PDGFA|MAPK9|DGKG|GPCPD1	http://www.genome.jp/kegg-bin/show_pathway?bta05231/bta:100137872%09red/bta:281577%09red/bta:513723%09red/bta:518523%09red/bta:505908%09red/bta:540741%09red/bta:404181%09red/bta:518469%09red/bta:537533%09red/bta:506322%09red/bta:537631%09red/bta:534125%09
Transport to the Golgi and subsequent modification	Reactome	R-BTA-948021	17	100	0.000696491	0.00552522	CAPZA2|ACTR1A|TMED2|ACTR10|DYNC1I1|DCTN6|ST8SIA2|TMED9|NAPG|MGAT2|MAN1C1|PPP6C|ARF5|STX17|TUBB2A|NAPB|B4GALT6	http://www.reactome.org/cgi-bin/eventbrowser_st_id?ST_ID=R-BTA-948021
Regulation of actin cytoskeleton	KEGG PATHWAY	bta04810	28	212	0.000712961	0.00562075	PDGFRA|PTK2|CRKL|RRAS2|WASL|IQGAP2|NRAS|GNG12|TIAM1|MAPK1|FGF17|ITGB1|PDGFA|ITGB8|MYLK4|CFL2|PAK5|FGF7|RHOA|FGF2|ACTN1|ABI2|VAV3|VAV2|EZR|BAIAP2|ARPC1A|CDC42	http://www.genome.jp/kegg-bin/show_pathway?bta04810/bta:515718%09red/bta:281574%09red/bta:281577%09red/bta:506270%09red/bta:532712%09red/bta:518180%09red/bta:536286%09red/bta:519269%09red/bta:507837%09red/bta:513432%09red/bta:524770%09red/bta:282301%09red
Adrenergic signaling in cardiomyocytes	KEGG PATHWAY	bta04261	22	150	0.000758847	0.00591959	PPP2R1B|ATP2A2|ACTC1|AKT2|AKT3|GNAI3|CACNB3|CACNB2|CACNA1D|CACNB4|MAPK1|SLC8A1|CREB1|ATP1B1|PPP2R2C|ATP2B1|ATP2B2|ATP2B4|GNAQ|PRKACB|SCN5A|ATF2	http://www.genome.jp/kegg-bin/show_pathway?bta04261/bta:519758%09red/bta:281713%09red/bta:613800%09red/bta:539521%09red/bta:540568%09red/bta:536654%09red/bta:782110%09red/bta:100137872%09red/bta:282641%09red/bta:100138150%09red/bta:327667%09red/bta:534923
Membrane Trafficking	Reactome	R-BTA-199991	35	291	0.000788442	0.00611324	ACTR10|WASL|AP1S3|DCTN6|RAB18|UBAP1|FZD4|TMED2|HBEGF|DYNC1I1|ARF6|TMED9|NAPG|GOLGA1|PPP6C|NAPB|VTA1|RAB14|ACTR1A|RAB5B|TMF1|ALS2|DENND5B|GDI2|TUBB2A|CAPZA2|SCOC|ARPC1A|GJC1|UBA52|ARF5|EREG|STX17|CLVS2|VPS54	http://www.reactome.org/cgi-bin/eventbrowser_st_id?ST_ID=R-BTA-199991
Protein-protein interactions at synapses	Reactome	R-BTA-6794362	8	26	0.000791497	0.0061201	SLITRK6|EPB41L3|SLITRK2|NLGN1|DLG3|CASK|LRRTM2|HOMER1	http://www.reactome.org/cgi-bin/eventbrowser_st_id?ST_ID=R-BTA-6794362
Bacterial invasion of epithelial cells	KEGG PATHWAY	bta05100	14	74	0.000811148	0.00626861	ITGB1|PTK2|CRKL|ARPC1A|CBL|GAB1|MET|CDC42|WASL|CDH1|RHOA|CTNNA3|CAV2|ARHGEF26	http://www.genome.jp/kegg-bin/show_pathway?bta05100/bta:280855%09red/bta:281577%09red/bta:527418%09red/bta:506270%09red/bta:532712%09red/bta:518180%09red/bta:540085%09red/bta:780777%09red/bta:493642%09red/bta:531741%09red/bta:508402%09red/bta:282637%09red
Transmission across Chemical Synapses	Reactome	R-BTA-112315	17	102	0.000846887	0.00651978	LIN7A|KCNJ3|DLG3|SLC38A2|CACNB3|GRIK2|GNB1|LIN7C|GNG12|CACNB4|CASK|GNG2|PRKAR1A|PRKACB|KCNJ2|GABRA1|GNAI3	http://www.reactome.org/cgi-bin/eventbrowser_st_id?ST_ID=R-BTA-112315
Apoptosis	KEGG PATHWAY	bta04210	21	142	0.00089962	0.00688439	BCL2L1|APAF1|PMAIP1|CTSO|BAK1|BIRC3|EIF2AK3|CTSC|NRAS|PARP1|DFFB|CHUK|PTPN13|AKT2|AKT3|MAPK10|MCL1|HRK|MAPK1|MAPK9|CTSV	http://www.genome.jp/kegg-bin/show_pathway?bta04210/bta:535820%09red/bta:514090%09red/bta:100137872%09red/bta:286764%09red/bta:352958%09red/bta:327672%09red/bta:788087%09red/bta:282333%09red/bta:537782%09red/bta:100296226%09red/bta:787139%09red/bta:281108
@@Apoptosis	Reactome	R-BTA-109581	8	47	0.0172445	0.068608	BCL2L1|BMF|KPNA1|PPP3R1|VIM|SATB1|DNM1L|BAK1	http://www.reactome.org/cgi-bin/eventbrowser_st_id?ST_ID=R-BTA-109581
SUMO E3 ligases SUMOylate target proteins	Reactome	R-BTA-3108232	14	75	0.000909718	0.00692782	NR3C2|NR3C1|PHC3|SUMO1|TDG|TFAP2C|THRB|BMI1|RORA|NUP210|SATB2|SATB1|RNF2|ING2	http://www.reactome.org/cgi-bin/eventbrowser_st_id?ST_ID=R-BTA-3108232
Assembly of collagen fibrils and other multimeric structures	Reactome	R-BTA-2022090	6	14	0.00091446	0.00693769	TLL1|COL5A3|COL1A2|COL1A1|COL2A1|CTSV	http://www.reactome.org/cgi-bin/eventbrowser_st_id?ST_ID=R-BTA-2022090
Developmental Biology	Reactome	R-BTA-1266738	25	184	0.000934748	0.00708779	STX1B|GAB1|WASL|GAP43|NRAS|MEF2A|SLIT3|DSG2|DSG3|CRMP1|EFNA4|GPC1|RHOB|RHOA|BNIP2|PLXNC1|LELP1|NCK1|NCK2|PLXNA2|ARPC1A|NTN4|EZR|UBA52|PTPRA	http://www.reactome.org/cgi-bin/eventbrowser_st_id?ST_ID=R-BTA-1266738
Toxoplasmosis	KEGG PATHWAY	bta05145	18	113	0.000963359	0.00727734	ITGB1|BCL2L1|LAMA2|LAMC1|STAT3|STAT1|HSPA2|IFNG|BIRC3|CHUK|MAP3K7|AKT2|AKT3|MAPK10|MAPK1|MAPK9|GNAI3|TGFB2	http://www.genome.jp/kegg-bin/show_pathway?bta05145/bta:100138434%09red/bta:532572%09red/bta:534069%09red/bta:100137872%09red/bta:281237%09red/bta:327672%09red/bta:529146%09red/bta:508541%09red/bta:510814%09red/bta:281827%09red/bta:281073%09red/bta:539521
Regulation of insulin secretion	Reactome	R-BTA-422356	10	42	0.000999682	0.00751547	GNAQ|GCG|ACSL3|CACNB3|CACNB2|GNB1|GNG12|CACNA1D|GNG2|PRKACB	http://www.reactome.org/cgi-bin/eventbrowser_st_id?ST_ID=R-BTA-422356
Chronic myeloid leukemia	KEGG PATHWAY	bta05220	14	76	0.00101818	0.00761798	BCL2L1|TGFB2|CRKL|MECOM|CDKN1B|NRAS|CHUK|CBL|BAK1|AKT2|AKT3|MAPK1|MDM2|POLK	http://www.genome.jp/kegg-bin/show_pathway?bta05220/bta:532209%09red/bta:514090%09red/bta:534069%09red/bta:100137872%09red/bta:527418%09red/bta:518180%09red/bta:541218%09red/bta:281073%09red/bta:506322%09red/bta:534923%09red/bta:327672%09red/bta:512613%09
PDGF signaling pathway	PANTHER	P00047	12	59	0.00108767	0.0080524	SRF|NCK1|MAP3K2|RPS6KB1|NRAS|CHUK|SRGAP3|GAB1|ETS1|MAPK10|STAT3|RASA2	http://www.pantherdb.org/pathway/pathwayDiagram.jsp?catAccession=P00047
Endometrial cancer	KEGG PATHWAY	bta05213	12	59	0.00108767	0.0080524	NRAS|TCF7L2|GSK3B|FOXO3|PTEN|AKT2|AKT3|CDH1|MAPK1|BAK1|POLK|CTNNA3	http://www.genome.jp/kegg-bin/show_pathway?bta05213/bta:514090%09red/bta:535530%09red/bta:100137872%09red/bta:790875%09red/bta:541218%09red/bta:780777%09red/bta:506322%09red/bta:540786%09red/bta:534923%09red/bta:327672%09red/bta:540481%09red/bta:282637%09
Ras Pathway	PANTHER	P04393	9	35	0.00111748	0.00823851	SRF|STAT3|NRAS|AKT3|ETS1|MAPK10|RHOB|RHOA|RALA	http://www.pantherdb.org/pathway/pathwayDiagram.jsp?catAccession=P04393
Sphingolipid de novo biosynthesis	Reactome	R-BTA-1660661	9	35	0.00111748	0.00823851	PLPP3|COL4A3BP|SPTLC2|SGMS2|SGMS1|SPTLC1|SAMD8|SGPP1|PRKD3	http://www.reactome.org/cgi-bin/eventbrowser_st_id?ST_ID=R-BTA-1660661
Beta-catenin independent WNT signaling	Reactome	R-BTA-3858494	11	51	0.00114782	0.00844011	FZD4|FZD5|PPP3R1|DAAM1|GNB1|MAP3K7|GNG12|UBA52|GNG2|NLK|RHOA	http://www.reactome.org/cgi-bin/eventbrowser_st_id?ST_ID=R-BTA-3858494
Hemostasis	Reactome	R-BTA-109582	32	265	0.00121632	0.00887436	TGFB2|TMX3|ATP2A2|RAP1B|GNAI3|CDC37L1|PDE1A|NRAS|GNG12|SPARC|COL1A2|PDE5A|ITGB1|IGF1|CAPZA2|COL1A1|GNB1|GPC1|PRKAR1A|VEGFC|RHOB|RHOA|TUBB2A|AKAP1|CXADR|ACTN1|GNAQ|RBSN|PCDH7|GNG2|PRKACB|F2RL2	http://www.reactome.org/cgi-bin/eventbrowser_st_id?ST_ID=R-BTA-109582
C-type lectin receptor signaling pathway	KEGG PATHWAY	bta04625	17	106	0.00123196	0.00897454	CBLB|STAT1|PPP3R1|EGR2|EGR3|RRAS2|NRAS|CHUK|PLCG2|AKT2|AKT3|MAPK10|MAPK1|RHOA|MAPK9|MDM2|MALT1	http://www.genome.jp/kegg-bin/show_pathway?bta04625/bta:100337091%09red/bta:525906%09red/bta:100137872%09red/bta:100297981%09red/bta:519269%09red/bta:510814%09red/bta:282321%09red/bta:281073%09red/bta:506322%09red/bta:504994%09red/bta:526233%09red/bta:537
MAPK family signaling cascades	Reactome	R-BTA-5683057	17	106	0.00123196	0.00897454	PDGFRA|KL|IL6R|PAQR3|NRAS|DLG3|IL6ST|FOXO3|HBEGF|UBA52|EREG|PTPRA|PRKACB|KITLG|CNKSR2|FGF2|RASA2	http://www.reactome.org/cgi-bin/eventbrowser_st_id?ST_ID=R-BTA-5683057
ESR-mediated signaling	Reactome	R-BTA-8939211	17	106	0.00123196	0.00897454	NCOA2|CBFB|NRAS|GNB1|UHMK1|GNG12|FOXO3|HBEGF|MED1|GNG2|EREG|SP1|CDKN1B|CAV2|GNAI3|CREBBP|GTF2A1	http://www.reactome.org/cgi-bin/eventbrowser_st_id?ST_ID=R-BTA-8939211
Neutrophil degranulation	Reactome	R-BTA-6798695	31	254	0.00123355	0.00897783	AGL|RAP2C|DYNLT1|MLEC|DSN1|RAP1B|ADAM10|ACTR10|PSMA5|CAND1|CPNE3|GLIPR1|NRAS|RAB18|GOLGA7|PSMC2|RAB14|CRISPLD2|DDX3X|SCAMP1|TSPAN14|ENPP4|FAF2|CYBB|GDI2|RHOA|SNAP25|CXCL2|TNFRSF1B|RAB5B|TNFAIP6	http://www.reactome.org/cgi-bin/eventbrowser_st_id?ST_ID=R-BTA-6798695
Chemokine signaling pathway	KEGG PATHWAY	bta04062	25	189	0.00130983	0.00944903	PTK2|CRKL|DOCK2|RAP1B|FOXO3|AKT2|AKT3|WASL|GNAI3|STAT3|STAT1|NRAS|GNG12|TIAM1|MAPK1|GNB1|CHUK|RHOA|CXCL2|VAV3|VAV2|GSK3B|GNG2|PRKACB|CDC42	http://www.genome.jp/kegg-bin/show_pathway?bta04062/bta:515718%09red/bta:281577%09red/bta:506270%09red/bta:532712%09red/bta:518180%09red/bta:510814%09red/bta:281203%09red/bta:282323%09red/bta:539521%09red/bta:510083%09red/bta:535530%09red/bta:100137872%09
SUMO is proteolytically processed	Reactome	R-BTA-3065679	4	5	0.00132796	0.00948757	SUMO1|SENP5|SENP2|SENP1	http://www.reactome.org/cgi-bin/eventbrowser_st_id?ST_ID=R-BTA-3065679
Non-integrin membrane-ECM interactions	Reactome	R-BTA-3000171	5	10	0.00146754	0.0103226	COL5A3|COL1A2|FGF2|COL2A1|COL1A1	http://www.reactome.org/cgi-bin/eventbrowser_st_id?ST_ID=R-BTA-3000171
Endocytosis	KEGG PATHWAY	bta04144	30	246	0.00147999	0.0103946	HSPA2|PDGFRA|NEDD4|WASL|CAV2|MDM2|PSD3|EEA1|RAB5B|ZFYVE16|ARF6|ARF5|RAB11A|VTA1|CBLB|IGF1R|CAPZA2|SH3GLB1|CYTH1|RHOA|RAB11FIP2|VPS35|RBSN|ARPC1A|CBL|GIT2|WIPF1|DNAJC6|ASAP2|CDC42	http://www.genome.jp/kegg-bin/show_pathway?bta04144/bta:539150%09red/bta:281577%09red/bta:527418%09red/bta:532712%09red/bta:536671%09red/bta:525906%09red/bta:507781%09red/bta:540378%09red/bta:282301%09red/bta:534708%09red/bta:511484%09red/bta:493642%09red
Oxytocin receptor mediated signaling pathway	PANTHER	P04391	9	37	0.00155712	0.0108552	SNAP25|GNAQ|CACNB3|CACNB2|GNB1|GNG12|CACNB4|GNG2|CACNA1D	http://www.pantherdb.org/pathway/pathwayDiagram.jsp?catAccession=P04391
SUMOylation of chromatin organization proteins	Reactome	R-BTA-4551638	6	16	0.00158557	0.0109506	SATB1|SUMO1|BMI1|SATB2|PHC3|RNF2	http://www.reactome.org/cgi-bin/eventbrowser_st_id?ST_ID=R-BTA-4551638
Circadian entrainment	KEGG PATHWAY	bta04713	16	100	0.00172702	0.0117889	KCNJ3|GNAQ|GRIA3|GRIA1|GNB1|GNG12|CACNA1D|PER3|MAPK1|GUCY1A2|GNG2|CREB1|ADCYAP1|PRKACB|PRKG1|GNAI3	http://www.genome.jp/kegg-bin/show_pathway?bta04713/bta:282004%09red/bta:534626%09red/bta:327672%09red/bta:281713%09red/bta:286850%09red/bta:613600%09red/bta:281203%09red/bta:526088%09red/bta:282323%09red/bta:281201%09red/bta:408013%09red/bta:614154%09red
Intracellular signaling by second messengers	Reactome	R-BTA-9006925	16	100	0.00172702	0.0117889	PDGFRA|PREX2|PDE1A|BMI1|GAB1|HBEGF|UBA52|EREG|PHC3|PRKACB|CBX6|KITLG|KL|RNF2|FGF2|PRKAR1A	http://www.reactome.org/cgi-bin/eventbrowser_st_id?ST_ID=R-BTA-9006925
Sphingolipid signaling pathway	KEGG PATHWAY	bta04071	18	120	0.00175864	0.0119359	PPP2R1B|SGPP1|GNAQ|PRKCE|NRAS|PPP2R2C|PTEN|AKT2|AKT3|MAPK10|SGMS2|SGMS1|SPTLC1|SPTLC2|RHOA|MAPK9|GNAI3|MAPK1	http://www.genome.jp/kegg-bin/show_pathway?bta04071/bta:327672%09red/bta:100137872%09red/bta:100138150%09red/bta:782110%09red/bta:537972%09red/bta:540786%09red/bta:507041%09red/bta:506322%09red/bta:539521%09red/bta:533538%09red/bta:537631%09red/bta:534125
Renin secretion	KEGG PATHWAY	bta04924	13	72	0.0017782	0.0119644	KCNJ2|GNAQ|PPP3R1|CACNA1D|PDE1A|PDE3A|KCNMA1|CREB1|PDE3B|GUCY1A2|ADCYAP1|PRKACB|GNAI3	http://www.genome.jp/kegg-bin/show_pathway?bta04924/bta:536636%09red/bta:282573%09red/bta:281713%09red/bta:533323%09red/bta:282321%09red/bta:281883%09red/bta:282323%09red/bta:539521%09red/bta:408013%09red/bta:536654%09red/bta:615187%09red/bta:613600%09red
VEGFA-VEGFR2 Pathway	Reactome	R-BTA-4420097	9	38	0.00182378	0.0122303	NCK1|NCK2|ABI2|CYBB|SHB|PRKACB|BAIAP2|RHOA|KDR	http://www.reactome.org/cgi-bin/eventbrowser_st_id?ST_ID=R-BTA-4420097
Measles	KEGG PATHWAY	bta05162	21	152	0.0019157	0.0127076	BCL2L1|CBLB|CD28|BAK1|STAT1|HSPA2|CCNE2|CDKN1B|EIF2AK3|CCND2|CHUK|TNFAIP3|MAP3K7|AKT2|AKT3|MAPK10|GSK3B|IL1A|STAT3|MAPK9|APAF1	http://www.genome.jp/kegg-bin/show_pathway?bta05162/bta:535820%09red/bta:529146%09red/bta:100137872%09red/bta:537631%09red/bta:514090%09red/bta:790875%09red/bta:281050%09red/bta:281250%09red/bta:537782%09red/bta:510814%09red/bta:281827%09red/bta:281073%09
ECM proteoglycans	Reactome	R-BTA-3000178	6	17	0.00203613	0.0133061	ITGB1|COL5A3|SPARC|COL1A2|COL1A1|COL2A1	http://www.reactome.org/cgi-bin/eventbrowser_st_id?ST_ID=R-BTA-3000178
Neurexins and neuroligins	Reactome	R-BTA-6794361	6	17	0.00203613	0.0133061	EPB41L3|NLGN1|DLG3|CASK|LRRTM2|HOMER1	http://www.reactome.org/cgi-bin/eventbrowser_st_id?ST_ID=R-BTA-6794361
Hedgehog signaling pathway	PANTHER	P00025	4	6	0.00210724	0.013701	SMO|UBR5|PRKAR1A|CREBBP	http://www.pantherdb.org/pathway/pathwayDiagram.jsp?catAccession=P00025
@@Hedgehog signaling pathway	KEGG PATHWAY	bta04340	8	47	0.0172445	0.068608	CCND2|GSK3B|SMO|CDON|CSNK1E|PRKACB|GAS1|KIF3A	http://www.genome.jp/kegg-bin/show_pathway?bta04340/bta:539308%09red/bta:541246%09red/bta:540336%09red/bta:768234%09red/bta:790875%09red/bta:536011%09red/bta:282323%09red/bta:615414%09red
5HT2 type receptor mediated signaling pathway	PANTHER	P04374	9	39	0.00212571	0.0137728	SNAP25|GNAQ|CACNB3|CACNB2|GNB1|GNG12|CACNB4|GNG2|CACNA1D	http://www.pantherdb.org/pathway/pathwayDiagram.jsp?catAccession=P04374
Potassium Channels	Reactome	R-BTA-1296071	11	56	0.00219987	0.014108	KCNH5|KCNJ3|KCNJ2|HCN1|GNB1|KCNMA1|GNG12|GNG2|KCNS2|KCNV1|KCNA1	http://www.reactome.org/cgi-bin/eventbrowser_st_id?ST_ID=R-BTA-1296071
Leukocyte transendothelial migration	KEGG PATHWAY	bta04670	17	113	0.00226215	0.0144745	ITGB1|NCF2|ACTN1|PTK2|VAV3|VAV2|RASSF5|RAP1B|EZR|CYBB|PLCG2|ARHGAP5|CLDN1|RHOA|CDC42|GNAI3|CTNNA3	http://www.genome.jp/kegg-bin/show_pathway?bta04670/bta:515718%09red/bta:100337091%09red/bta:521961%09red/bta:506270%09red/bta:532712%09red/bta:281346%09red/bta:414922%09red/bta:780777%09red/bta:788978%09red/bta:338049%09red/bta:281574%09red/bta:327708%09
PI3 kinase pathway	PANTHER	P00048	8	32	0.00242567	0.0153673	GNAQ|RPS6KB1|NRAS|CCND2|GNB1|FOXO3|AKT3|GNAI3	http://www.pantherdb.org/pathway/pathwayDiagram.jsp?catAccession=P00048
Interleukin signaling pathway	PANTHER	P00036	8	32	0.00242567	0.0153673	SRF|STAT3|CDKN1B|NRAS|CHUK|FOXO3|AKT3|IL1A	http://www.pantherdb.org/pathway/pathwayDiagram.jsp?catAccession=P00036
Cushing syndrome	KEGG PATHWAY	bta04934	21	156	0.00253468	0.0159789	CDKN2B|FZD3|FZD4|GNAQ|ASH2L|CCNE2|SP1|CACNA1D|RAP1B|CREB1|PDE8A|MAPK1|ATF2|TCF7L2|PRKACB|CDKN1B|KCNA4|GSK3B|GNAI3|PDE8B|FZD5	http://www.genome.jp/kegg-bin/show_pathway?bta04934/bta:506787%09red/bta:540481%09red/bta:540741%09red/bta:538536%09red/bta:445416%09red/bta:790875%09red/bta:327672%09red/bta:281713%09red/bta:509827%09red/bta:107131388%09red/bta:100138350%09red/bta:281880
Signaling by Nuclear Receptors	Reactome	R-BTA-9006931	18	125	0.00261769	0.0163923	NCOA2|CBFB|PDHA1|GNB1|NRAS|UHMK1|GNG12|FOXO3|HBEGF|MED1|GNG2|EREG|SP1|CDKN1B|CAV2|GNAI3|CREBBP|GTF2A1	http://www.reactome.org/cgi-bin/eventbrowser_st_id?ST_ID=R-BTA-9006931
Human immunodeficiency virus 1 infection	KEGG PATHWAY	bta05170	28	234	0.00266402	0.0166602	BCL2L1|PTK2|CRKL|NRAS|PLCG2|AKT2|AKT3|MAPK10|AP1S3|GNAI3|PPP3R1|RPS6KB1|MAP3K7|GNG12|MAPK1|ATR|WEE1|MAPK9|CHEK1|GNB1|CHUK|CFL2|PAK5|TNFRSF1B|GNAQ|BAK1|GNG2|RNF7	http://www.genome.jp/kegg-bin/show_pathway?bta05170/bta:513678%09red/bta:506270%09red/bta:518180%09red/bta:282321%09red/bta:281201%09red/bta:539521%09red/bta:504869%09red/bta:536654%09red/bta:282152%09red/bta:338033%09red/bta:100137872%09red/bta:404181%09
Ca2+ pathway	Reactome	R-BTA-4086398	8	33	0.00285598	0.0174806	FZD4|FZD5|PPP3R1|GNB1|MAP3K7|GNG12|GNG2|NLK	http://www.reactome.org/cgi-bin/eventbrowser_st_id?ST_ID=R-BTA-4086398
Glioma	KEGG PATHWAY	bta05214	13	77	0.00299009	0.0182302	PDGFA|IGF1R|IGF1|PTEN|NRAS|PDGFRA|BAK1|PLCG2|AKT2|AKT3|MAPK1|MDM2|POLK	http://www.genome.jp/kegg-bin/show_pathway?bta05214/bta:100337091%09red/bta:514090%09red/bta:281239%09red/bta:100137872%09red/bta:505908%09red/bta:541218%09red/bta:506322%09red/bta:281848%09red/bta:540786%09red/bta:534923%09red/bta:327672%09red/bta:540378
MAPK1/MAPK3 signaling	Reactome	R-BTA-5684996	15	97	0.00316445	0.018941	PDGFRA|KL|IL6R|PAQR3|NRAS|DLG3|IL6ST|HBEGF|UBA52|EREG|PTPRA|KITLG|CNKSR2|FGF2|RASA2	http://www.reactome.org/cgi-bin/eventbrowser_st_id?ST_ID=R-BTA-5684996
Platinum drug resistance	KEGG PATHWAY	bta01524	13	78	0.00329888	0.0195547	BCL2L1|BRCA1|PMAIP1|BIRC3|MSH6|BAK1|AKT2|AKT3|MAPK1|MDM2|ATP7A|APAF1|REV3L	http://www.genome.jp/kegg-bin/show_pathway?bta01524/bta:100137872%09red/bta:540526%09red/bta:327672%09red/bta:537782%09red/bta:100296226%09red/bta:541275%09red/bta:514090%09red/bta:353120%09red/bta:534923%09red/bta:514386%09red/bta:540378%09red/bta:282152
Apoptosis - multiple species	KEGG PATHWAY	bta04215	8	34	0.0033435	0.0196949	BCL2L1|PMAIP1|BIRC6|BIRC3|BAK1|MAPK10|MAPK9|APAF1	http://www.genome.jp/kegg-bin/show_pathway?bta04215/bta:537782%09red/bta:100296226%09red/bta:514090%09red/bta:537631%09red/bta:534125%09red/bta:534211%09red/bta:514386%09red/bta:282152%09red
TNF signaling pathway	KEGG PATHWAY	bta04668	17	118	0.00337421	0.0198675	CEBPB|CXCL2|TNFRSF1B|IL18R1|BIRC3|CHUK|TNFAIP3|MAP3K7|MAPK1|AKT2|AKT3|MAPK10|CREB1|VEGFC|DNM1L|MAPK9|ATF2	http://www.genome.jp/kegg-bin/show_pathway?bta04668/bta:338033%09red/bta:100137872%09red/bta:537631%09red/bta:540892%09red/bta:282122%09red/bta:281713%09red/bta:509827%09red/bta:407221%09red/bta:281073%09red/bta:529146%09red/bta:281214%09red/bta:508105%09
Metabolism	Reactome	R-BTA-1430728	82	918	0.00349125	0.0204456	PGM2L1|UGCG|AGL|HS3ST1|ACSL3|GNPDA2|IDI1|CH25H|PRKAA2|CHSY1|UPB1|NDUFA5|WASL|SGMS1|SLC25A17|PRKAB2|AK4|SLC25A12|NCOA2|PANK3|PPP1R3C|DCK|N6AMT1|CACNB3|CACNB2|GCSH|PPM1K|GNG12|CYP26B1|GATM|PFKM|PRKD3|NDUFB6|SPTLC1|COL4A3BP|SPTLC2|MTMR4|SAMD8|RAB14|MID1IP1|H	http://www.reactome.org/cgi-bin/eventbrowser_st_id?ST_ID=R-BTA-1430728
Long-term depression	KEGG PATHWAY	bta04730	11	60	0.00351429	0.0205124	PPP2R1B|IGF1|GNAQ|GRIA3|GRIA1|NRAS|IGF1R|GUCY1A2|PRKG1|MAPK1|GNAI3	http://www.genome.jp/kegg-bin/show_pathway?bta04730/bta:282004%09red/bta:281239%09red/bta:100138150%09red/bta:534626%09red/bta:327672%09red/bta:613600%09red/bta:506322%09red/bta:281848%09red/bta:539521%09red/bta:529618%09red/bta:536654%09red
COPI-mediated anterograde transport	Reactome	R-BTA-6807878	11	60	0.00351429	0.0205124	CAPZA2|TMED2|ACTR10|DYNC1I1|DCTN6|TMED9|NAPG|ARF5|ACTR1A|TUBB2A|NAPB	http://www.reactome.org/cgi-bin/eventbrowser_st_id?ST_ID=R-BTA-6807878
Transcriptional regulation by RUNX3	Reactome	R-BTA-8878159	5	13	0.00359508	0.0209233	TEAD2|RBPJ|CBFB|UBA52|CREBBP	http://www.reactome.org/cgi-bin/eventbrowser_st_id?ST_ID=R-BTA-8878159
Platelet activation, signaling and aggregation	Reactome	R-BTA-76002	19	140	0.00365184	0.0212274	CDC37L1|ACTN1|IGF1|GNAQ|COL1A2|GNB1|RAP1B|GNG12|F2RL2|SPARC|GNG2|VEGFC|COL1A1|TMX3|RHOB|RHOA|PCDH7|GNAI3|TGFB2	http://www.reactome.org/cgi-bin/eventbrowser_st_id?ST_ID=R-BTA-76002
Dilated cardiomyopathy (DCM)	KEGG PATHWAY	bta05414	15	99	0.00375386	0.0217419	ITGB1|ITGB8|IGF1|DMD|ATP2A2|CACNB3|ACTC1|LAMA2|CACNB2|CACNB4|DAG1|PRKACB|SLC8A1|CACNA1D|TGFB2	http://www.genome.jp/kegg-bin/show_pathway?bta05414/bta:337925%09red/bta:100138434%09red/bta:281239%09red/bta:533219%09red/bta:282160%09red/bta:282161%09red/bta:281439%09red/bta:536286%09red/bta:534069%09red/bta:282323%09red/bta:540568%09red/bta:408013%09
Signaling by FGFR	Reactome	R-BTA-190236	10	52	0.0039231	0.0223567	FLRT3|NRAS|ESRP1|GAB1|UBA52|HNRNPH1|PTBP1|KL|FGF2|GALNT3	http://www.reactome.org/cgi-bin/eventbrowser_st_id?ST_ID=R-BTA-190236
Integrin cell surface interactions	Reactome	R-BTA-216083	6	20	0.0039727	0.0224896	ITGB1|COL5A3|COL1A2|COL1A1|COL2A1|KDR	http://www.reactome.org/cgi-bin/eventbrowser_st_id?ST_ID=R-BTA-216083
FLT3 Signaling	Reactome	R-BTA-9607240	15	100	0.00408058	0.0229987	CNKSR2|PDGFRA|KL|PAQR3|NRAS|DLG3|GAB1|HBEGF|UBA52|EREG|PTPRA|KITLG|PDE3B|FGF2|RASA2	http://www.reactome.org/cgi-bin/eventbrowser_st_id?ST_ID=R-BTA-9607240
Huntington disease	PANTHER	P00029	12	71	0.00421906	0.0237508	ACTA1|ARPC1A|DYNC1I1|ACTC1|GRIK2|ARF6|ARF5|AKT3|WASL|BDNF|ARL4C|CREBBP	http://www.pantherdb.org/pathway/pathwayDiagram.jsp?catAccession=P00029
@@Huntington disease	KEGG PATHWAY	bta05016	15	198	0.312735	0.465055	NDUFA5|GNAQ|DNALI1|SP1|PPARGC1A|CREB1|NDUFS2|RCOR1|CREBBP|NDUFB6|VDAC2|BDNF|SDHD|APAF1|COX7A2L	http://www.genome.jp/kegg-bin/show_pathway?bta05016/bta:540741%09red/bta:338446%09red/bta:282120%09red/bta:281713%09red/bta:537782%09red/bta:505453%09red/bta:506525%09red/bta:327714%09red/bta:327665%09red/bta:327697%09red/bta:540225%09red/bta:617701%09red
Neurotrophin signaling pathway	KEGG PATHWAY	bta04722	17	122	0.00455971	0.0252438	FOXO3|NTF3|CRKL|NRAS|RAP1B|GAB1|AKT3|PLCG2|AKT2|RPS6KA3|MAPK10|GSK3B|MAPK1|RHOA|MAPK9|BDNF|CDC42	http://www.genome.jp/kegg-bin/show_pathway?bta04722/bta:100337091%09red/bta:535530%09red/bta:100137872%09red/bta:617701%09red/bta:511190%09red/bta:532712%09red/bta:518180%09red/bta:540085%09red/bta:532393%09red/bta:790875%09red/bta:506322%09red/bta:537631
ER to Golgi Anterograde Transport	Reactome	R-BTA-199977	13	82	0.00480342	0.0263628	CAPZA2|ACTR1A|TMED2|ACTR10|DYNC1I1|DCTN6|TMED9|NAPG|PPP6C|ARF5|STX17|TUBB2A|NAPB	http://www.reactome.org/cgi-bin/eventbrowser_st_id?ST_ID=R-BTA-199977
Signaling by ERBB2	Reactome	R-BTA-1227986	6	21	0.00484951	0.0263628	NRAS|GAB1|HBEGF|UBA52|EREG|RHOA	http://www.reactome.org/cgi-bin/eventbrowser_st_id?ST_ID=R-BTA-1227986
Ferroptosis	KEGG PATHWAY	bta04216	9	45	0.00486668	0.0264052	ACSL3|PCBP1|ACSL6|SLC7A11|ACSL4|CYBB|ATG7|ATG5|VDAC2	http://www.genome.jp/kegg-bin/show_pathway?bta04216/bta:509917%09red/bta:787967%09red/bta:506059%09red/bta:532686%09red/bta:524078%09red/bta:282120%09red/bta:536628%09red/bta:281112%09red/bta:100138312%09red
Cell cycle	KEGG PATHWAY	bta04110	17	123	0.00490406	0.0265773	CDKN2B|CREBBP|TGFB2|CDKN1C|CDKN1B|CCND2|MDM2|CDC14A|GSK3B|CCNE2|ATR|CDC6|PTTG1|WEE1|YWHAG|TFDP1|CHEK1	http://www.genome.jp/kegg-bin/show_pathway?bta04110/bta:538436%09red/bta:534069%09red/bta:286862%09red/bta:513678%09red/bta:534579%09red/bta:790875%09red/bta:515301%09red/bta:614777%09red/bta:508043%09red/bta:540322%09red/bta:510972%09red/bta:527124%09red
@@Cell cycle	PANTHER	P00013	2	9	0.140672	0.275137	CCND2|PSME3	http://www.pantherdb.org/pathway/pathwayDiagram.jsp?catAccession=P00013
@@Cell Cycle	Reactome	R-BTA-1640170	26	318	0.146581	0.283391	SUMO1|CDKN1B|DSN1|RAB2A|CDC6|HJURP|DYNC1I1|WAPL|CEP76|NIPBL|PSMA5|PTTG1|PSMC2|NUP210|CHEK1|CENPK|PSME3|CNEP1R1|TUBB2A|TAOK1|GINS2|GINS1|CCND2|UBA52|ACTR1A|TFDP1	http://www.reactome.org/cgi-bin/eventbrowser_st_id?ST_ID=R-BTA-1640170
Neddylation	Reactome	R-BTA-8951664	16	113	0.0050746	0.0273857	HIF3A|WSB1|ASB7|CAND1|ASB5|FBXL3|COMMD7|UBA52|KLHL2|DCUN1D5|DCUN1D4|RNF7|FBXO30|FEM1B|FEM1C|FBXW7	http://www.reactome.org/cgi-bin/eventbrowser_st_id?ST_ID=R-BTA-8951664
Thyrotropin-releasing hormone receptor signaling pathway	PANTHER	P04394	8	37	0.0051991	0.0278444	SNAP25|GNAQ|CACNB3|CACNB2|GNB1|GNG12|CACNB4|GNG2	http://www.pantherdb.org/pathway/pathwayDiagram.jsp?catAccession=P04394
Interferon Signaling	Reactome	R-BTA-913531	8	37	0.0051991	0.0278444	EIF4E2|PPM1B|ARIH1|SUMO1|IFNG|PDE12|PTPN1|ABCE1	http://www.reactome.org/cgi-bin/eventbrowser_st_id?ST_ID=R-BTA-913531
Prolactin signaling pathway	KEGG PATHWAY	bta04917	13	83	0.00525468	0.0281314	TNFSF11|SOCS6|STAT3|STAT1|CCND2|NRAS|GSK3B|FOXO3|AKT2|AKT3|MAPK10|MAPK1|MAPK9	http://www.genome.jp/kegg-bin/show_pathway?bta04917/bta:535530%09red/bta:100137872%09red/bta:513836%09red/bta:615146%09red/bta:790875%09red/bta:510814%09red/bta:506322%09red/bta:537631%09red/bta:534125%09red/bta:534923%09red/bta:327672%09red/bta:508541%09
Purine metabolism	KEGG PATHWAY	bta00230	18	135	0.00539812	0.0287356	ATIC|ENPP4|DCK|PDE3A|PDE1A|AK7|ENPP3|PDE3B|PDE8A|GDA|GUCY1A2|PDE8B|NT5C2|PDE4B|AK4|PDE4D|PDE10A|PDE5A	http://www.genome.jp/kegg-bin/show_pathway?bta00230/bta:536636%09red/bta:506343%09red/bta:511269%09red/bta:529405%09red/bta:517063%09red/bta:530642%09red/bta:525937%09red/bta:533323%09red/bta:506787%09red/bta:281972%09red/bta:506061%09red/bta:107131388%09
Cholinergic synapse	KEGG PATHWAY	bta04725	16	114	0.00546933	0.0291037	KCNJ3|KCNJ2|GNAQ|GNB1|CACNA1B|KCNQ5|NRAS|GNG12|CACNA1D|AKT2|AKT3|GNG2|CREB1|PRKACB|MAPK1|GNAI3	http://www.genome.jp/kegg-bin/show_pathway?bta04725/bta:282410%09red/bta:100137872%09red/bta:506322%09red/bta:281883%09red/bta:281713%09red/bta:526088%09red/bta:286850%09red/bta:281203%09red/bta:539521%09red/bta:282323%09red/bta:281201%09red/bta:408013%09
Sphingolipid metabolism	Reactome	R-BTA-428157	10	55	0.00554396	0.0293567	PLPP3|COL4A3BP|UGCG|SPTLC2|SGMS2|SGMS1|SPTLC1|SAMD8|SGPP1|PRKD3	http://www.reactome.org/cgi-bin/eventbrowser_st_id?ST_ID=R-BTA-428157
@@Sphingolipid metabolism	KEGG PATHWAY	bta00600	9	49	0.00785052	0.0383839	UGCG|UGT8|PLPP3|SPTLC2|SGMS2|SGMS1|SPTLC1|SGPP1|B4GALT6	http://www.genome.jp/kegg-bin/show_pathway?bta00600/bta:524460%09red/bta:533538%09red/bta:537972%09red/bta:514357%09red/bta:516881%09red/bta:520954%09red/bta:614165%09red/bta:281566%09red/bta:617707%09red
Heterotrimeric G-protein signaling pathway-Gi alpha and Gs alpha mediated pathway	PANTHER	P00026	13	84	0.00573924	0.0302318	KCNJ3|RGS17|HTR1E|GNB1|RAP1B|GNG12|GNG2|PRKAR1A|PRKACB|GNRHR|GNAI3|CREBBP|RGS1	http://www.pantherdb.org/pathway/pathwayDiagram.jsp?catAccession=P00026
PIP3 activates AKT signaling	Reactome	R-BTA-1257604	13	84	0.00573924	0.0302318	PDGFRA|PREX2|BMI1|GAB1|HBEGF|UBA52|EREG|PHC3|CBX6|KITLG|KL|RNF2|FGF2	http://www.reactome.org/cgi-bin/eventbrowser_st_id?ST_ID=R-BTA-1257604
SUMOylation of intracellular receptors	Reactome	R-BTA-4090294	5	15	0.00587935	0.0307629	SUMO1|NR3C2|NR3C1|THRB|RORA	http://www.reactome.org/cgi-bin/eventbrowser_st_id?ST_ID=R-BTA-4090294
O-glycosylation of TSR domain-containing proteins	Reactome	R-BTA-5173214	5	15	0.00587935	0.0307629	ADAMTS10|ADAMTS6|ADAMTS9|ADAMTS3|ADAMTS2	http://www.reactome.org/cgi-bin/eventbrowser_st_id?ST_ID=R-BTA-5173214
Metabotropic glutamate receptor group III pathway	PANTHER	P00039	7	30	0.00616733	0.0318771	SNAP25|STX1B|GRIK2|GNB1|PRKAR1A|PRKACB|GNAI3	http://www.pantherdb.org/pathway/pathwayDiagram.jsp?catAccession=P00039
Metabotropic glutamate receptor group II pathway	PANTHER	P00040	7	30	0.00616733	0.0318771	SNAP25|STX1B|GNB1|PRKAR1A|PRKACB|BDNF|GNAI3	http://www.pantherdb.org/pathway/pathwayDiagram.jsp?catAccession=P00040
Signaling by the B Cell Receptor (BCR)	Reactome	R-BTA-983705	7	30	0.00616733	0.0318771	NCK1|PPP3R1|DAPP1|NRAS|CHUK|UBA52|MALT1	http://www.reactome.org/cgi-bin/eventbrowser_st_id?ST_ID=R-BTA-983705
Collagen chain trimerization	Reactome	R-BTA-8948216	4	9	0.00619631	0.0318771	COL5A3|COL1A2|COL2A1|COL1A1	http://www.reactome.org/cgi-bin/eventbrowser_st_id?ST_ID=R-BTA-8948216
Regulation of FZD by ubiquitination	Reactome	R-BTA-4641263	4	9	0.00619631	0.0318771	FZD4|UBA52|LRP6|FZD5	http://www.reactome.org/cgi-bin/eventbrowser_st_id?ST_ID=R-BTA-4641263
Processing and activation of SUMO	Reactome	R-BTA-3215018	4	9	0.00619631	0.0318771	SUMO1|SENP5|SENP2|SENP1	http://www.reactome.org/cgi-bin/eventbrowser_st_id?ST_ID=R-BTA-3215018
Rho GTPase cycle	Reactome	R-BTA-194840	9	47	0.00622212	0.0319516	TAGAP|SRGAP3|RHOU|GDI2|RHOB|RHOA|ARHGEF26|ARHGAP29|ARHGAP19	http://www.reactome.org/cgi-bin/eventbrowser_st_id?ST_ID=R-BTA-194840
Serotonergic synapse	KEGG PATHWAY	bta04726	16	116	0.00633349	0.0324879	KCNJ3|GNAQ|GNB1|CACNA1B|NRAS|GNG12|CACNA1D|MAPK1|TRPC1|GNG2|HTR2C|PRKACB|HTR1E|GABRB2|GABRB3|GNAI3	http://www.genome.jp/kegg-bin/show_pathway?bta04726/bta:538909%09red/bta:282410%09red/bta:506322%09red/bta:282100%09red/bta:526088%09red/bta:286850%09red/bta:281203%09red/bta:529593%09red/bta:282323%09red/bta:281201%09red/bta:408013%09red/bta:539521%09red
Signaling by Rho GTPases	Reactome	R-BTA-194315	25	216	0.00635434	0.032583	MYH10|DSN1|SRGAP3|WASL|CENPK|NCOA2|DYNC1I1|GOPC|ARHGAP29|SRF|DAAM1|RHOU|CYBB|GDI2|RHOB|RHOA|TUBB2A|TAOK1|NCK1|TAGAP|ABI2|ARPC1A|BAIAP2|ARHGEF26|ARHGAP19	http://www.reactome.org/cgi-bin/eventbrowser_st_id?ST_ID=R-BTA-194315
Other interleukin signaling	Reactome	R-BTA-449836	15	106	0.00656124	0.0336073	CNKSR2|PDGFRA|KL|PAQR3|NRAS|DLG3|GAB1|HBEGF|UBA52|EREG|PTPRA|KITLG|PDE3B|FGF2|RASA2	http://www.reactome.org/cgi-bin/eventbrowser_st_id?ST_ID=R-BTA-449836
Mitophagy - animal	KEGG PATHWAY	bta04137	11	66	0.00659047	0.0336469	BCL2L1|TFEB|SP1|EIF2AK3|RRAS2|NRAS|FOXO3|MAPK10|ATG5|MAPK9|TBC1D17	http://www.genome.jp/kegg-bin/show_pathway?bta04137/bta:535820%09red/bta:535530%09red/bta:532686%09red/bta:540741%09red/bta:514858%09red/bta:519269%09red/bta:506322%09red/bta:537631%09red/bta:534125%09red/bta:510032%09red/bta:282152%09red
Transcriptional regulation by RUNX1	Reactome	R-BTA-8878171	12	76	0.00678253	0.0345649	ASH2L|LMO2|PRMT6|BMI1|UBA52|CBFB|CREBBP|PHC3|ELF1|CBX6|RNF2|CTSV	http://www.reactome.org/cgi-bin/eventbrowser_st_id?ST_ID=R-BTA-8878171
Cytoskeletal regulation by Rho GTPase	PANTHER	P00016	8	39	0.00681549	0.0346202	MYH10|ACTA1|ACTC1|ARPC1A|RHOU|WASL|PAK5|CFL2	http://www.pantherdb.org/pathway/pathwayDiagram.jsp?catAccession=P00016
Signaling by PDGF	Reactome	R-BTA-186797	6	23	0.00701673	0.0351735	PDGFRA|NCK1|NCK2|NRAS|COL5A3|COL2A1	http://www.reactome.org/cgi-bin/eventbrowser_st_id?ST_ID=R-BTA-186797
5HT1 type receptor mediated signaling pathway	PANTHER	P04373	7	31	0.00717206	0.0358374	SNAP25|GNB1|GNG12|GNG2|PRKACB|HTR1E|GNAI3	http://www.pantherdb.org/pathway/pathwayDiagram.jsp?catAccession=P04373
Non-small cell lung cancer	KEGG PATHWAY	bta05223	11	67	0.00726242	0.0361991	STAT3|RASSF5|NRAS|BAK1|FOXO3|PLCG2|AKT2|AKT3|STK4|MAPK1|POLK	http://www.genome.jp/kegg-bin/show_pathway?bta05223/bta:100337091%09red/bta:514090%09red/bta:535530%09red/bta:100137872%09red/bta:514886%09red/bta:541218%09red/bta:506322%09red/bta:534923%09red/bta:327672%09red/bta:539767%09red/bta:508541%09red
RUNX1 interacts with co-factors whose precise effect on RUNX1 targets is not known	Reactome	R-BTA-8939243	5	16	0.00733696	0.0362756	CBX6|CBFB|RNF2|BMI1|PHC3	http://www.reactome.org/cgi-bin/eventbrowser_st_id?ST_ID=R-BTA-8939243
VEGF signaling pathway	KEGG PATHWAY	bta04370	10	58	0.00764559	0.0376037	PTK2|PPP3R1|NRAS|PLCG2|AKT2|AKT3|VEGFA|MAPK1|KDR|CDC42	http://www.genome.jp/kegg-bin/show_pathway?bta04370/bta:100337091%09red/bta:100137872%09red/bta:281572%09red/bta:506270%09red/bta:532712%09red/bta:407170%09red/bta:282321%09red/bta:506322%09red/bta:534923%09red/bta:327672%09red
@@VEGF signaling pathway	PANTHER	P00056	4	25	0.0959295	0.219301	ETS1|NRAS|KDR|PRKD3	http://www.pantherdb.org/pathway/pathwayDiagram.jsp?catAccession=P00056
Nicotine addiction	KEGG PATHWAY	bta05033	8	40	0.00775345	0.0380148	GABRG2|SLC17A6|GRIA1|GRIA3|GABRB2|GABRB3|GABRA1|CACNA1B	http://www.genome.jp/kegg-bin/show_pathway?bta05033/bta:100125225%09red/bta:534626%09red/bta:780973%09red/bta:282410%09red/bta:529593%09red/bta:529618%09red/bta:282240%09red/bta:540657%09red
Vasopressin-regulated water reabsorption	KEGG PATHWAY	bta04962	9	49	0.00785052	0.0383839	AQP4|RAB5B|DYNC1I1|CREB1|RAB11A|DYNC1LI2|PRKACB|DCTN6|DCTN5	http://www.genome.jp/kegg-bin/show_pathway?bta04962/bta:539150%09red/bta:613724%09red/bta:281008%09red/bta:534708%09red/bta:281713%09red/bta:506441%09red/bta:519789%09red/bta:282323%09red/bta:513751%09red
Phospholipase D signaling pathway	KEGG PATHWAY	bta04072	19	152	0.00797264	0.0389136	PDGFA|PDGFRA|RALGDS|DGKG|RRAS2|NRAS|ARF6|GAB1|PLCG2|AKT2|AKT3|CYTH1|MAPK1|RHOA|GRM7|PLPP3|KITLG|RALA|DGKH	http://www.genome.jp/kegg-bin/show_pathway?bta04072/bta:100337091%09red/bta:538477%09red/bta:513723%09red/bta:518523%09red/bta:535362%09red/bta:100141038%09red/bta:540085%09red/bta:505908%09red/bta:519269%09red/bta:100294979%09red/bta:100137872%09red/bta:
Programmed Cell Death	Reactome	R-BTA-5357801	9	50	0.00877726	0.0418079	BCL2L1|BMF|KPNA1|PPP3R1|VIM|UBA52|SATB1|DNM1L|BAK1	http://www.reactome.org/cgi-bin/eventbrowser_st_id?ST_ID=R-BTA-5357801
O-linked glycosylation	Reactome	R-BTA-5173105	8	41	0.00878512	0.0418079	ADAMTS6|ADAMTS3|ADAMTS2|ADAMTS9|GALNT18|ADAMTS10|B4GALT6|GALNT3	http://www.reactome.org/cgi-bin/eventbrowser_st_id?ST_ID=R-BTA-5173105
Platelet activation	KEGG PATHWAY	bta04611	16	121	0.00898154	0.0426419	ITGB1|GNAQ|MYLK4|PRKACB|RAP1B|AKT3|PLCG2|AKT2|GUCY1A2|PRKG1|COL1A1|COL3A1|COL1A2|RHOA|GNAI3|MAPK1	http://www.genome.jp/kegg-bin/show_pathway?bta04611/bta:100337091%09red/bta:282004%09red/bta:100137872%09red/bta:282188%09red/bta:327672%09red/bta:510833%09red/bta:282187%09red/bta:539521%09red/bta:518025%09red/bta:327708%09red/bta:534923%09red/bta:536654
Transcriptional regulation by the AP-2 (TFAP2) family of transcription factors	Reactome	R-BTA-8864260	5	17	0.00902855	0.0426639	SUMO1|KCTD1|DEK|TFAP2C|CREBBP	http://www.reactome.org/cgi-bin/eventbrowser_st_id?ST_ID=R-BTA-8864260
Elastic fibre formation	Reactome	R-BTA-1566948	5	17	0.00902855	0.0426639	ITGB1|BMP7|TGFB2|FBN2|BMP2	http://www.reactome.org/cgi-bin/eventbrowser_st_id?ST_ID=R-BTA-1566948
Synthesis of active ubiquitin: roles of E1 and E2 enzymes	Reactome	R-BTA-8866652	5	17	0.00902855	0.0426639	UBE2H|UBE2K|UBA52|UBE2G1|UBE2W	http://www.reactome.org/cgi-bin/eventbrowser_st_id?ST_ID=R-BTA-8866652
Molecules associated with elastic fibres	Reactome	R-BTA-2129379	5	17	0.00902855	0.0426639	ITGB1|BMP7|TGFB2|FBN2|BMP2	http://www.reactome.org/cgi-bin/eventbrowser_st_id?ST_ID=R-BTA-2129379
Gap junction	KEGG PATHWAY	bta04540	13	90	0.00944297	0.0445625	PDGFA|PDGFRA|TJP1|GNAQ|MAP3K2|NRAS|GUCY1A2|PRKG1|HTR2C|PRKACB|MAPK1|TUBB2A|GNAI3	http://www.genome.jp/kegg-bin/show_pathway?bta04540/bta:282004%09red/bta:407102%09red/bta:100295973%09red/bta:504592%09red/bta:538909%09red/bta:505908%09red/bta:282323%09red/bta:539521%09red/bta:506322%09red/bta:327672%09red/bta:536654%09red/bta:613600%09
GABAergic synapse	KEGG PATHWAY	bta04727	13	90	0.00944297	0.0445625	GLS|SLC38A2|GABRG2|CACNA1B|GNB1|GNG12|CACNA1D|GNG2|PRKACB|GABRB2|GABRB3|GABRA1|GNAI3	http://www.genome.jp/kegg-bin/show_pathway?bta04727/bta:282410%09red/bta:780973%09red/bta:338044%09red/bta:286850%09red/bta:525335%09red/bta:281203%09red/bta:529593%09red/bta:282323%09red/bta:281201%09red/bta:408013%09red/bta:539521%09red/bta:282240%09red
Nuclear Receptor transcription pathway	Reactome	R-BTA-383280	7	33	0.00953757	0.0449337	NR3C2|NR3C1|THRB|RORB|RORA|MED1|NRBF2	http://www.reactome.org/cgi-bin/eventbrowser_st_id?ST_ID=R-BTA-383280
Nephrin family interactions	Reactome	R-BTA-373753	3	5	0.00990447	0.0454405	WASL|NCK2|NCK1	http://www.reactome.org/cgi-bin/eventbrowser_st_id?ST_ID=R-BTA-373753
Dopamine Neurotransmitter Release Cycle	Reactome	R-BTA-212676	3	5	0.00990447	0.0454405	LIN7A|LIN7C|CASK	http://www.reactome.org/cgi-bin/eventbrowser_st_id?ST_ID=R-BTA-212676
IL-17 signaling pathway	KEGG PATHWAY	bta04657	13	91	0.0102097	0.0466806	CEBPB|CXCL2|TRAF4|ELAVL1|IFNG|CHUK|TNFAIP3|MAP3K7|MAPK1|MAPK10|GSK3B|USP25|MAPK9	http://www.genome.jp/kegg-bin/show_pathway?bta04657/bta:537631%09red/bta:790875%09red/bta:281237%09red/bta:524531%09red/bta:281073%09red/bta:781568%09red/bta:617316%09red/bta:508105%09red/bta:534125%09red/bta:529146%09red/bta:327672%09red/bta:338319%09red
Heterotrimeric G-protein signaling pathway-Gq alpha and Go alpha mediated pathway	PANTHER	P00027	10	61	0.0103135	0.0470179	KCNJ3|RGS17|GNAQ|GNB1|RAP1B|GNG12|GNG2|RGS1|GNRHR|RHOA	http://www.pantherdb.org/pathway/pathwayDiagram.jsp?catAccession=P00027
Collagen degradation	Reactome	R-BTA-1442490	4	11	0.0107341	0.0482949	COL5A3|COL1A2|COL2A1|COL1A1	http://www.reactome.org/cgi-bin/eventbrowser_st_id?ST_ID=R-BTA-1442490
GABA receptor activation	Reactome	R-BTA-977443	7	34	0.0109132	0.0487073	KCNJ3|KCNJ2|GNB1|GNG12|GNG2|GABRA1|GNAI3	http://www.reactome.org/cgi-bin/eventbrowser_st_id?ST_ID=R-BTA-977443
DDX58/IFIH1-mediated induction of interferon-alpha/beta	Reactome	R-BTA-168928	5	18	0.0109709	0.0487073	NKIRAS2|UBA52|CREBBP|TNFAIP3|CHUK	http://www.reactome.org/cgi-bin/eventbrowser_st_id?ST_ID=R-BTA-168928
RAF/MAP kinase cascade	Reactome	R-BTA-5673001	13	92	0.0110241	0.048836	PDGFRA|PAQR3|NRAS|DLG3|CNKSR2|HBEGF|UBA52|EREG|PTPRA|KITLG|KL|FGF2|RASA2	http://www.reactome.org/cgi-bin/eventbrowser_st_id?ST_ID=R-BTA-5673001
HSP90 chaperone cycle for steroid hormone receptors (SHR)	Reactome	R-BTA-3371497	8	43	0.0111513	0.0492445	NR3C2|NR3C1|CAPZA2|DYNC1I1|DCTN6|ACTR10|ACTR1A|TUBB2A	http://www.reactome.org/cgi-bin/eventbrowser_st_id?ST_ID=R-BTA-3371497
C-type lectin receptors (CLRs)	Reactome	R-BTA-5621481	8	43	0.0111513	0.0492445	PPP3R1|NRAS|CHUK|MAP3K7|UBA52|MALT1|PRKACB|CREBBP	http://www.reactome.org/cgi-bin/eventbrowser_st_id?ST_ID=R-BTA-5621481
Metabolism of lipids	Reactome	R-BTA-556833	33	325	0.0113505	0.0500771	UGCG|IDI1|PRKAA2|MED1|SGMS2|SGMS1|SLC25A17|COL4A3BP|NCOA2|CPNE3|SPTLC2|HMGCS2|SPTLC1|MTMR4|SAMD8|RAB14|MID1IP1|PLPP3|PRKAB2|MTM1|HMGCR|OSBPL3|OSBPL10|TBL1XR1|ACSL3|ACSL6|PON2|ELOVL6|SGPP1|CH25H|PLEKHA8|CREBBP|PRKD3	http://www.reactome.org/cgi-bin/eventbrowser_st_id?ST_ID=R-BTA-556833
NOD-like receptor signaling pathway	KEGG PATHWAY	bta04621	21	181	0.0113908	0.0502392	BCL2L1|NEK7|DNM1L|CXCL2|ANTXR1|STAT1|ANTXR2|BIRC3|CHUK|TNFAIP3|MAP3K7|CYBB|MAPK1|ATG12|SUGT1|MAPK10|ATG5|VDAC2|RHOA|MAPK9|CARD6	http://www.genome.jp/kegg-bin/show_pathway?bta04621/bta:327672%09red/bta:532686%09red/bta:537631%09red/bta:540892%09red/bta:520291%09red/bta:282120%09red/bta:781355%09red/bta:282152%09red/bta:510814%09red/bta:281073%09red/bta:529146%09red/bta:281214%09red
Kaposi sarcoma-associated herpesvirus infection	KEGG PATHWAY	bta05167	23	206	0.0123841	0.0539615	PPP3R1|IL6ST|PLCG2|AKT2|AKT3|MAPK10|GSK3B|STAT3|STAT1|NRAS|GNG12|MAPK1|ANGPT2|MAPK9|GNB1|CHUK|CREB1|VEGFA|FGF2|CXCL2|BAK1|GNG2|CREBBP	http://www.genome.jp/kegg-bin/show_pathway?bta05167/bta:281572%09red/bta:281713%09red/bta:510814%09red/bta:282321%09red/bta:281201%09red/bta:505453%09red/bta:100137872%09red/bta:514090%09red/bta:534923%09red/bta:508541%09red/bta:100337091%09red/bta:790875
Neurotransmitter receptors and postsynaptic signal transmission	Reactome	R-BTA-112314	11	73	0.0124829	0.0541237	KCNJ3|KCNJ2|DLG3|GRIK2|GNB1|GNG12|GNG2|PRKAR1A|PRKACB|GABRA1|GNAI3	http://www.reactome.org/cgi-bin/eventbrowser_st_id?ST_ID=R-BTA-112314
Pantothenate and CoA biosynthesis	KEGG PATHWAY	bta00770	5	19	0.0131798	0.0567101	UPB1|PANK3|VNN1|ENPP3|AASDHPPT	http://www.genome.jp/kegg-bin/show_pathway?bta00770/bta:510749%09red/bta:504557%09red/bta:519816%09red/bta:529405%09red/bta:526704%09red
RHO GTPases Activate WASPs and WAVEs	Reactome	R-BTA-5663213	5	19	0.0131798	0.0567101	ABI2|BAIAP2|ARPC1A|WASL|NCK1	http://www.reactome.org/cgi-bin/eventbrowser_st_id?ST_ID=R-BTA-5663213
Vasopressin regulates renal water homeostasis via Aquaporins	Reactome	R-BTA-432040	6	27	0.0133124	0.0571338	AQP4|GNB1|GNG12|GNG2|PRKAR1A|PRKACB	http://www.reactome.org/cgi-bin/eventbrowser_st_id?ST_ID=R-BTA-432040
Metabotropic glutamate receptor group I pathway	PANTHER	P00041	4	12	0.0136359	0.0580525	HOMER1|GNAQ|PRKAR1A|PRKACB	http://www.pantherdb.org/pathway/pathwayDiagram.jsp?catAccession=P00041
Notch signaling pathway	PANTHER	P00045	4	12	0.0136359	0.0580525	ADAM10|RBPJ|HEY2|HEY1	http://www.pantherdb.org/pathway/pathwayDiagram.jsp?catAccession=P00045
@@Notch signaling pathway	KEGG PATHWAY	bta04330	6	48	0.107501	0.232234	DTX4|RBPJ|KAT2B|NOTCH2|CREBBP|NUMBL	http://www.genome.jp/kegg-bin/show_pathway?bta04330/bta:513730%09red/bta:510973%09red/bta:505453%09red/bta:767928%09red/bta:407215%09red/bta:528508%09red
Signaling by BMP	Reactome	R-BTA-201451	4	12	0.0136359	0.0580525	ACVR2A|NOG|SMAD1|BMP2	http://www.reactome.org/cgi-bin/eventbrowser_st_id?ST_ID=R-BTA-201451
Regulation of lipid metabolism by Peroxisome proliferator-activated receptor alpha (PPARalpha)	Reactome	R-BTA-400206	4	12	0.0136359	0.0580525	NCOA2|MED1|TBL1XR1|CREBBP	http://www.reactome.org/cgi-bin/eventbrowser_st_id?ST_ID=R-BTA-400206
mRNA surveillance pathway	KEGG PATHWAY	bta03015	13	95	0.0137719	0.0585079	PPP2R1B|SMG1|WDR82|SRRM1|PABPC5|PPP2R2C|NXF1|CSTF3|SAP18|FIP1L1|HBS1L|CPSF2|PABPC4L	http://www.genome.jp/kegg-bin/show_pathway?bta03015/bta:101908085%09red/bta:541083%09red/bta:511286%09red/bta:525143%09red/bta:615692%09red/bta:784123%09red/bta:100138150%09red/bta:508491%09red/bta:783336%09red/bta:327689%09red/bta:512136%09red/bta:782110
ERBB2 Regulates Cell Motility	Reactome	R-BTA-6785631	3	6	0.0141927	0.059015	HBEGF|RHOA|EREG	http://www.reactome.org/cgi-bin/eventbrowser_st_id?ST_ID=R-BTA-6785631
Glucagon signaling in metabolic regulation	Reactome	R-BTA-163359	3	6	0.0141927	0.059015	PRKAR1A|GCG|PRKACB	http://www.reactome.org/cgi-bin/eventbrowser_st_id?ST_ID=R-BTA-163359
Human cytomegalovirus infection	KEGG PATHWAY	bta05163	26	245	0.0143101	0.0593015	PDGFRA|PTK2|CRKL|NRAS|MDM2|AKT2|AKT3|BAK1|GNAI3|STAT3|PPP3R1|RPS6KB1|GNG12|MAPK1|SP1|GNB1|CHUK|CREB1|IL6R|VEGFA|RHOA|GNAQ|GSK3B|GNG2|PRKACB|ATF2	http://www.genome.jp/kegg-bin/show_pathway?bta05163/bta:281572%09red/bta:506270%09red/bta:518180%09red/bta:281713%09red/bta:282321%09red/bta:282323%09red/bta:539521%09red/bta:536654%09red/bta:540378%09red/bta:282301%09red/bta:100137872%09red/bta:404181%09
Salmonella infection	KEGG PATHWAY	bta05132	12	85	0.0143335	0.0593015	DYNC1I1|TJP1|IFNG|ARPC1A|MAPK1|CXCL2|MAPK10|WASL|DYNC1LI2|IL1A|MAPK9|CDC42	http://www.genome.jp/kegg-bin/show_pathway?bta05132/bta:281577%09red/bta:613724%09red/bta:532712%09red/bta:281237%09red/bta:281250%09red/bta:519789%09red/bta:407102%09red/bta:281214%09red/bta:537631%09red/bta:534125%09red/bta:327672%09red/bta:508402%09red
Central carbon metabolism in cancer	KEGG PATHWAY	bta05230	10	65	0.0149039	0.0614823	PDGFRA|PDHA1|MET|NRAS|AKT2|PTEN|PFKM|AKT3|MAPK1|GLS	http://www.genome.jp/kegg-bin/show_pathway?bta05230/bta:280855%09red/bta:100137872%09red/bta:506544%09red/bta:407109%09red/bta:525335%09red/bta:506322%09red/bta:540786%09red/bta:534923%09red/bta:327672%09red/bta:282301%09red
Oxytocin signaling pathway	KEGG PATHWAY	bta04921	18	152	0.0153063	0.062942	KCNJ3|KCNJ2|PRKAB2|GNAQ|PPP3R1|CACNB3|CACNB2|MYLK4|PRKAG2|NRAS|PRKAA2|CACNB4|GUCY1A2|PRKACB|MAPK1|RHOA|CACNA1D|GNAI3	http://www.genome.jp/kegg-bin/show_pathway?bta04921/bta:327672%09red/bta:282160%09red/bta:282321%09red/bta:281883%09red/bta:504219%09red/bta:282161%09red/bta:512665%09red/bta:327667%09red/bta:526088%09red/bta:282323%09red/bta:539521%09red/bta:518025%09red
GABA B receptor activation	Reactome	R-BTA-977444	6	28	0.015356	0.062942	KCNJ3|KCNJ2|GNB1|GNG12|GNG2|GNAI3	http://www.reactome.org/cgi-bin/eventbrowser_st_id?ST_ID=R-BTA-977444
Signaling by FGFR1	Reactome	R-BTA-5654736	6	28	0.015356	0.062942	NRAS|FLRT3|KL|UBA52|GAB1|FGF2	http://www.reactome.org/cgi-bin/eventbrowser_st_id?ST_ID=R-BTA-5654736
Activation of GABAB receptors	Reactome	R-BTA-991365	6	28	0.015356	0.062942	KCNJ3|KCNJ2|GNB1|GNG12|GNG2|GNAI3	http://www.reactome.org/cgi-bin/eventbrowser_st_id?ST_ID=R-BTA-991365
B cell receptor signaling pathway	KEGG PATHWAY	bta04662	12	86	0.0154602	0.0633139	DAPP1|PPP3R1|VAV3|VAV2|NRAS|CHUK|GSK3B|PLCG2|AKT2|AKT3|MAPK1|MALT1	http://www.genome.jp/kegg-bin/show_pathway?bta04662/bta:515718%09red/bta:100337091%09red/bta:100137872%09red/bta:521961%09red/bta:790875%09red/bta:282321%09red/bta:281073%09red/bta:506322%09red/bta:504994%09red/bta:534923%09red/bta:327672%09red/bta:533156
Opioid Signalling	Reactome	R-BTA-111885	8	46	0.015538	0.0633748	PDE1A|GNB1|GNG12|GNG2|PRKAR1A|PRKACB|PDE4B|GNAI3	http://www.reactome.org/cgi-bin/eventbrowser_st_id?ST_ID=R-BTA-111885
Fc epsilon receptor (FCERI) signaling	Reactome	R-BTA-2454202	8	46	0.015538	0.0633748	PPP3R1|NRAS|CHUK|MAP3K7|UBA52|MAPK10|MAPK9|MALT1	http://www.reactome.org/cgi-bin/eventbrowser_st_id?ST_ID=R-BTA-2454202
Inhibition of voltage gated Ca2+ channels via Gbeta/gamma subunits	Reactome	R-BTA-997272	5	20	0.01567	0.0634908	KCNJ3|GNB1|GNG2|GNG12|KCNJ2	http://www.reactome.org/cgi-bin/eventbrowser_st_id?ST_ID=R-BTA-997272
Activation of G protein gated Potassium channels	Reactome	R-BTA-1296041	5	20	0.01567	0.0634908	KCNJ3|GNB1|GNG2|GNG12|KCNJ2	http://www.reactome.org/cgi-bin/eventbrowser_st_id?ST_ID=R-BTA-1296041
SUMOylation of transcription cofactors	Reactome	R-BTA-3899300	5	20	0.01567	0.0634908	SUMO1|PHC3|RNF2|BMI1|ING2	http://www.reactome.org/cgi-bin/eventbrowser_st_id?ST_ID=R-BTA-3899300
G protein gated Potassium channels	Reactome	R-BTA-1296059	5	20	0.01567	0.0634908	KCNJ3|GNB1|GNG2|GNG12|KCNJ2	http://www.reactome.org/cgi-bin/eventbrowser_st_id?ST_ID=R-BTA-1296059
TNFR1-induced NFkappaB signaling pathway	Reactome	R-BTA-5357956	5	20	0.01567	0.0634908	UBA52|OTUD7B|CHUK|TNFAIP3|MAP3K7	http://www.reactome.org/cgi-bin/eventbrowser_st_id?ST_ID=R-BTA-5357956
RNA transport	KEGG PATHWAY	bta03013	19	164	0.0157196	0.0636735	EIF1B|EIF4E2|NUP62|SRRM1|SUMO1|NUP62CL|PABPC5|NXF1|SENP2|NUP153|EIF4G3|FXR2|PABPC4L|SAP18|NMD3|THOC1|EIF2S2|NUP210|EIF4B	http://www.genome.jp/kegg-bin/show_pathway?bta03013/bta:513270%09red/bta:505850%09red/bta:784123%09red/bta:614967%09red/bta:618127%09red/bta:511286%09red/bta:100138517%09red/bta:100125264%09red/bta:534618%09red/bta:100138748%09red/bta:615692%09red/bta:513
Pancreatic secretion	KEGG PATHWAY	bta04972	13	97	0.0158767	0.0642431	GNAQ|ATP2A2|RAP1B|ATP1B1|RAB11A|SLC4A4|TRPC1|KCNMA1|SLC12A2|ATP2B1|RHOA|ATP2B2|ATP2B4	http://www.genome.jp/kegg-bin/show_pathway?bta04972/bta:519758%09red/bta:282360%09red/bta:286845%09red/bta:534708%09red/bta:282100%09red/bta:282641%09red/bta:327708%09red/bta:613800%09red/bta:540568%09red/bta:338049%09red/bta:536654%09red/bta:282573%09red
Acute myeloid leukemia	KEGG PATHWAY	bta05221	10	66	0.0162578	0.0654397	CEBPA|STAT3|NRAS|RPS6KB1|CHUK|TCF7L2|AKT2|AKT3|RUNX1T1|MAPK1	http://www.genome.jp/kegg-bin/show_pathway?bta05221/bta:100137872%09red/bta:404181%09red/bta:508541%09red/bta:281073%09red/bta:506322%09red/bta:281677%09red/bta:534923%09red/bta:327672%09red/bta:540481%09red/bta:538628%09red
Signaling by WNT	Reactome	R-BTA-195721	17	142	0.0165603	0.0666384	LRP6|FZD5|PPP3R1|ASH2L|DAAM1|CDC73|GNB1|MAP3K7|GNG12|SOX17|UBA52|GNG2|FZD4|VPS35|NLK|RHOA|CREBBP	http://www.reactome.org/cgi-bin/eventbrowser_st_id?ST_ID=R-BTA-195721
p53 pathway by glucose deprivation	PANTHER	P04397	4	13	0.0169911	0.0677912	PRKAB2|AKT3|RPS6KB1|PRKAA2	http://www.pantherdb.org/pathway/pathwayDiagram.jsp?catAccession=P04397
Phase 2 - plateau phase	Reactome	R-BTA-5576893	4	13	0.0169911	0.0677912	CACNB3|CACNB2|CACNA1D|CACNB4	http://www.reactome.org/cgi-bin/eventbrowser_st_id?ST_ID=R-BTA-5576893
Netrin-1 signaling	Reactome	R-BTA-373752	4	13	0.0169911	0.0677912	NTN4|WASL|EZR|NCK1	http://www.reactome.org/cgi-bin/eventbrowser_st_id?ST_ID=R-BTA-373752
Signaling by ROBO receptors	Reactome	R-BTA-376176	4	13	0.0169911	0.0677912	GPC1|RHOA|SLIT3|UBA52	http://www.reactome.org/cgi-bin/eventbrowser_st_id?ST_ID=R-BTA-376176
Transport of small molecules	Reactome	R-BTA-382551	32	324	0.0174146	0.0692264	ADD3|ATP2A2|SLC33A1|SLC30A5|ARL2BP|ATP7A|SLC7A8|CAND1|SLC28A3|GNG12|SLC12A5|ABCD3|SLC6A15|SLC6A14|LRRC8D|AQP4|SLC35B4|SLC38A2|ATP8A2|WNK3|GNB1|LPL|PRKAR1A|SLC26A7|SGK1|SLC17A6|UBA52|GNG2|ABCA3|ATP6V1G1|PRKACB|ATP6V1C2	http://www.reactome.org/cgi-bin/eventbrowser_st_id?ST_ID=R-BTA-382551
Aquaporin-mediated transport	Reactome	R-BTA-445717	6	29	0.0176069	0.0697349	AQP4|GNB1|GNG12|GNG2|PRKAR1A|PRKACB	http://www.reactome.org/cgi-bin/eventbrowser_st_id?ST_ID=R-BTA-445717
Progesterone-mediated oocyte maturation	KEGG PATHWAY	bta04914	12	88	0.0179129	0.0706099	IGF1R|RPS6KA3|CPEB3|PDE3B|AKT2|AKT3|MAPK10|IGF1|PRKACB|MAPK1|MAPK9|GNAI3	http://www.genome.jp/kegg-bin/show_pathway?bta04914/bta:281239%09red/bta:100137872%09red/bta:511190%09red/bta:537016%09red/bta:533323%09red/bta:539521%09red/bta:282323%09red/bta:281848%09red/bta:537631%09red/bta:534125%09red/bta:534923%09red/bta:327672%09
Phosphatidylinositol signaling system	KEGG PATHWAY	bta04070	13	99	0.0182175	0.0716303	PIK3C2A|PTEN|MTM1|IPMK|INPP4B|PPIP5K2|PLCG2|DGKH|SYNJ1|MTMR4|MTMR3|DGKG|IP6K1	http://www.genome.jp/kegg-bin/show_pathway?bta04070/bta:100337091%09red/bta:535099%09red/bta:537790%09red/bta:282087%09red/bta:518523%09red/bta:533622%09red/bta:780855%09red/bta:534029%09red/bta:540786%09red/bta:615135%09red/bta:534793%09red/bta:537533%09
Antiviral mechanism by IFN-stimulated genes	Reactome	R-BTA-1169410	5	21	0.0184551	0.0720418	ABCE1|PDE12|EIF4E2|PPM1B|ARIH1	http://www.reactome.org/cgi-bin/eventbrowser_st_id?ST_ID=R-BTA-1169410
Phase 0 - rapid depolarisation	Reactome	R-BTA-5576892	5	21	0.0184551	0.0720418	CACNB3|CACNB2|CACNB4|CACNA1D|SCN1A	http://www.reactome.org/cgi-bin/eventbrowser_st_id?ST_ID=R-BTA-5576892
Downstream signaling events of B Cell Receptor (BCR)	Reactome	R-BTA-1168372	5	21	0.0184551	0.0720418	UBA52|NRAS|PPP3R1|MALT1|CHUK	http://www.reactome.org/cgi-bin/eventbrowser_st_id?ST_ID=R-BTA-1168372
Signaling by FGFR3	Reactome	R-BTA-5654741	5	21	0.0184551	0.0720418	UBA52|GAB1|NRAS|FGF2|GALNT3	http://www.reactome.org/cgi-bin/eventbrowser_st_id?ST_ID=R-BTA-5654741
Osteoclast differentiation	KEGG PATHWAY	bta04380	16	133	0.0189494	0.0738283	NCF2|TNFSF11|TGFB2|STAT1|PPP3R1|IFNG|CHUK|CREB1|MAP3K7|PLCG2|AKT2|AKT3|MAPK10|IL1A|MAPK9|MAPK1	http://www.genome.jp/kegg-bin/show_pathway?bta04380/bta:100337091%09red/bta:281346%09red/bta:534069%09red/bta:100137872%09red/bta:513836%09red/bta:281713%09red/bta:281237%09red/bta:281250%09red/bta:510814%09red/bta:282321%09red/bta:281073%09red/bta:529146
GRB2 events in EGFR signaling	Reactome	R-BTA-179812	3	7	0.0193722	0.0741637	HBEGF|NRAS|EREG	http://www.reactome.org/cgi-bin/eventbrowser_st_id?ST_ID=R-BTA-179812
CD209 (DC-SIGN) signaling	Reactome	R-BTA-5621575	3	7	0.0193722	0.0741637	NRAS|CREBBP|PRKACB	http://www.reactome.org/cgi-bin/eventbrowser_st_id?ST_ID=R-BTA-5621575
SHC1 events in ERBB4 signaling	Reactome	R-BTA-1250347	3	7	0.0193722	0.0741637	HBEGF|NRAS|EREG	http://www.reactome.org/cgi-bin/eventbrowser_st_id?ST_ID=R-BTA-1250347
GRB2 events in ERBB2 signaling	Reactome	R-BTA-1963640	3	7	0.0193722	0.0741637	HBEGF|NRAS|EREG	http://www.reactome.org/cgi-bin/eventbrowser_st_id?ST_ID=R-BTA-1963640
Transcriptional Regulation by E2F6	Reactome	R-BTA-8953750	4	14	0.0208185	0.0780058	PHC3|RNF2|BMI1|TFDP1	http://www.reactome.org/cgi-bin/eventbrowser_st_id?ST_ID=R-BTA-8953750
Signaling by ERBB4	Reactome	R-BTA-1236394	4	14	0.0208185	0.0780058	HBEGF|UBA52|NRAS|EREG	http://www.reactome.org/cgi-bin/eventbrowser_st_id?ST_ID=R-BTA-1236394
Non-alcoholic fatty liver disease (NAFLD)	KEGG PATHWAY	bta04932	18	158	0.0210638	0.0786949	CEBPA|NDUFA5|PRKAB2|NDUFB6|EIF2AK3|PRKAG2|PRKAA2|IL6R|AKT3|NDUFS2|AKT2|CDC42|MAPK10|GSK3B|IL1A|MAPK9|SDHD|COX7A2L	http://www.genome.jp/kegg-bin/show_pathway?bta04932/bta:535820%09red/bta:100137872%09red/bta:532712%09red/bta:504219%09red/bta:540225%09red/bta:512665%09red/bta:281250%09red/bta:790875%09red/bta:538954%09red/bta:327714%09red/bta:281677%09red/bta:327697%09
PCP/CE pathway	Reactome	R-BTA-4086400	5	22	0.0215473	0.0801823	DAAM1|RHOA|FZD4|UBA52|FZD5	http://www.reactome.org/cgi-bin/eventbrowser_st_id?ST_ID=R-BTA-4086400
Melanogenesis	KEGG PATHWAY	bta04916	13	102	0.0222044	0.082345	FZD3|FZD4|GNAQ|NRAS|CREB1|GSK3B|MAPK1|TCF7L2|PRKACB|KITLG|GNAI3|CREBBP|FZD5	http://www.genome.jp/kegg-bin/show_pathway?bta04916/bta:506322%09red/bta:538536%09red/bta:445416%09red/bta:790875%09red/bta:281713%09red/bta:282323%09red/bta:539521%09red/bta:281885%09red/bta:327672%09red/bta:536654%09red/bta:540481%09red/bta:445419%09red
Nucleotide-binding domain, leucine rich repeat containing receptor (NLR) signaling pathways	Reactome	R-BTA-168643	6	31	0.0227656	0.0838306	BCL2L1|SUGT1|CHUK|TNFAIP3|MAP3K7|UBA52	http://www.reactome.org/cgi-bin/eventbrowser_st_id?ST_ID=R-BTA-168643
Hepatitis B	KEGG PATHWAY	bta05161	19	172	0.0235255	0.0860667	TGFB2|DDX3X|STAT1|STAT3|EGR2|EGR3|NRAS|CHUK|CREB1|MAP3K7|CCNE2|AKT2|AKT3|MAPK10|CREBBP|MAPK1|MAPK9|APAF1|ATF2	http://www.genome.jp/kegg-bin/show_pathway?bta05161/bta:534069%09red/bta:100137872%09red/bta:509827%09red/bta:538436%09red/bta:510093%09red/bta:100297981%09red/bta:281713%09red/bta:537782%09red/bta:508541%09red/bta:510814%09red/bta:281073%09red/bta:506322
Apoptotic execution phase	Reactome	R-BTA-75153	4	15	0.0251333	0.0890999	DNM1L|SATB1|KPNA1|VIM	http://www.reactome.org/cgi-bin/eventbrowser_st_id?ST_ID=R-BTA-75153
GnRH signaling pathway	KEGG PATHWAY	bta04912	12	93	0.0253104	0.0890999	GNAQ|MAP3K2|CACNA1D|EGR1|NRAS|HBEGF|MAPK1|MAPK10|PRKACB|GNRHR|MAPK9|CDC42	http://www.genome.jp/kegg-bin/show_pathway?bta04912/bta:504592%09red/bta:506322%09red/bta:532712%09red/bta:282323%09red/bta:522921%09red/bta:537631%09red/bta:534125%09red/bta:281798%09red/bta:408013%09red/bta:536654%09red/bta:327672%09red/bta:407125%09red
PD-L1 expression and PD-1 checkpoint pathway in cancer	KEGG PATHWAY	bta05235	12	93	0.0253104	0.0890999	CD28|STAT3|PPP3R1|STAT1|IFNG|NRAS|RPS6KB1|CHUK|PTEN|AKT2|AKT3|MAPK1	http://www.genome.jp/kegg-bin/show_pathway?bta05235/bta:100137872%09red/bta:281050%09red/bta:281237%09red/bta:404181%09red/bta:510814%09red/bta:282321%09red/bta:281073%09red/bta:506322%09red/bta:540786%09red/bta:534923%09red/bta:327672%09red/bta:508541%09
Signaling by Hippo	Reactome	R-BTA-2028269	3	8	0.0254544	0.0890999	LATS1|STK3|STK4	http://www.reactome.org/cgi-bin/eventbrowser_st_id?ST_ID=R-BTA-2028269
SHC1 events in EGFR signaling	Reactome	R-BTA-180336	3	8	0.0254544	0.0890999	HBEGF|NRAS|EREG	http://www.reactome.org/cgi-bin/eventbrowser_st_id?ST_ID=R-BTA-180336
Negative regulation of activity of TFAP2 (AP-2) family transcription factors	Reactome	R-BTA-8866904	3	8	0.0254544	0.0890999	SUMO1|KCTD1|TFAP2C	http://www.reactome.org/cgi-bin/eventbrowser_st_id?ST_ID=R-BTA-8866904
DARPP-32 events	Reactome	R-BTA-180024	3	8	0.0254544	0.0890999	PDE4B|PRKAR1A|PRKACB	http://www.reactome.org/cgi-bin/eventbrowser_st_id?ST_ID=R-BTA-180024
Import of palmitoyl-CoA into the mitochondrial matrix	Reactome	R-BTA-200425	3	8	0.0254544	0.0890999	PRKAB2|PRKAA2|MID1IP1	http://www.reactome.org/cgi-bin/eventbrowser_st_id?ST_ID=R-BTA-200425
Tuberculosis	KEGG PATHWAY	bta05152	21	198	0.0257998	0.0901523	CREBBP|TGFB2|CEBPG|STAT1|PPP3R1|RAB5B|EEA1|CEBPB|CREB1|NFYC|IFNG|AKT2|AKT3|MAPK10|APAF1|IL1A|RHOA|MAPK9|MAPK1|MALT1|LAMP2	http://www.genome.jp/kegg-bin/show_pathway?bta05152/bta:539150%09red/bta:534069%09red/bta:100137872%09red/bta:537782%09red/bta:327672%09red/bta:281713%09red/bta:281237%09red/bta:281250%09red/bta:534003%09red/bta:516259%09red/bta:510814%09red/bta:282321%09
Cadherin signaling pathway	PANTHER	P00012	7	42	0.0274691	0.095066	ACTA1|FZD4|FZD5|ACTC1|PCDH7|PCDH18|CTNNA3	http://www.pantherdb.org/pathway/pathwayDiagram.jsp?catAccession=P00012
Immunoregulatory interactions between a Lymphoid and a non-Lymphoid cell	Reactome	R-BTA-198933	7	42	0.0274691	0.095066	ITGB1|CXADR|PIANP|COL1A2|COL1A1|CD200|COL2A1	http://www.reactome.org/cgi-bin/eventbrowser_st_id?ST_ID=R-BTA-198933
Signaling by FGFR2	Reactome	R-BTA-5654738	7	42	0.0274691	0.095066	NRAS|ESRP1|GAB1|UBA52|HNRNPH1|PTBP1|FGF2	http://www.reactome.org/cgi-bin/eventbrowser_st_id?ST_ID=R-BTA-5654738
Fanconi anemia pathway	KEGG PATHWAY	bta03460	8	52	0.0278297	0.0959139	BRCA1|POLK|FAN1|REV3L|ATR|REV1|TOP3A|RMI1	http://www.genome.jp/kegg-bin/show_pathway?bta03460/bta:508171%09red/bta:527411%09red/bta:541218%09red/bta:353120%09red/bta:504869%09red/bta:616986%09red/bta:517422%09red/bta:614063%09red
@@Fanconi Anemia Pathway	Reactome	R-BTA-6783310	2	24	0.473562	0.569859	FAN1|UBA52	http://www.reactome.org/cgi-bin/eventbrowser_st_id?ST_ID=R-BTA-6783310
Inositol phosphate metabolism	KEGG PATHWAY	bta00562	10	73	0.0283999	0.0978073	PTEN|MTM1|IPMK|INPP4B|PLCG2|PIK3C2A|PLCH1|SYNJ1|MTMR4|MTMR3	http://www.genome.jp/kegg-bin/show_pathway?bta00562/bta:100337091%09red/bta:535099%09red/bta:537790%09red/bta:282087%09red/bta:513565%09red/bta:533622%09red/bta:540786%09red/bta:615135%09red/bta:534793%09red/bta:782743%09red
@@Inositol phosphate metabolism	Reactome	R-BTA-1483249	2	25	0.493586	0.586055	NUDT11|IP6K1	http://www.reactome.org/cgi-bin/eventbrowser_st_id?ST_ID=R-BTA-1483249
GABA-B receptor II signaling	PANTHER	P05731	5	24	0.0286951	0.098559	KCNJ3|GNAI3|GNB1|PRKAR1A|PRKACB	http://www.pantherdb.org/pathway/pathwayDiagram.jsp?catAccession=P05731
Opioid proopiomelanocortin pathway	PANTHER	P05917	5	24	0.0286951	0.098559	GNB1|GNG2|GNAI3|GNG12|SNAP25	http://www.pantherdb.org/pathway/pathwayDiagram.jsp?catAccession=P05917
Enkephalin release	PANTHER	P05913	5	24	0.0286951	0.098559	GNB1|GNG2|GNAI3|GNG12|PRKACB	http://www.pantherdb.org/pathway/pathwayDiagram.jsp?catAccession=P05913
Inwardly rectifying K+ channels	Reactome	R-BTA-1296065	5	24	0.0286951	0.098559	KCNJ3|GNB1|GNG2|GNG12|KCNJ2	http://www.reactome.org/cgi-bin/eventbrowser_st_id?ST_ID=R-BTA-1296065
G alpha (12/13) signalling events	Reactome	R-BTA-416482	5	24	0.0286951	0.098559	GNB1|RHOB|RHOA|GNG2|GNG12	http://www.reactome.org/cgi-bin/eventbrowser_st_id?ST_ID=R-BTA-416482
Glucagon-like Peptide-1 (GLP1) regulates insulin secretion	Reactome	R-BTA-381676	5	24	0.0286951	0.098559	GNB1|GNG2|GCG|GNG12|PRKACB	http://www.reactome.org/cgi-bin/eventbrowser_st_id?ST_ID=R-BTA-381676
Downstream signaling of activated FGFR1	Reactome	R-BTA-5654687	5	24	0.0286951	0.098559	FLRT3|KL|NRAS|FGF2|GAB1	http://www.reactome.org/cgi-bin/eventbrowser_st_id?ST_ID=R-BTA-5654687
Muscarinic acetylcholine receptor 2 and 4 signaling pathway	PANTHER	P00043	6	33	0.0288524	0.0986903	KCNJ3|SNAP25|GNB1|PRKAR1A|PRKACB|GNAI3	http://www.pantherdb.org/pathway/pathwayDiagram.jsp?catAccession=P00043
@@Muscarinic acetylcholine receptor 1 and 3 signaling pathway	PANTHER	P00042	4	34	0.196969	0.348322	SNAP25|STX1B|GNB1|GNAQ	http://www.pantherdb.org/pathway/pathwayDiagram.jsp?catAccession=P00042
Basal cell carcinoma	KEGG PATHWAY	bta05217	9	63	0.0296292	0.101176	FZD3|FZD4|BMP2|TCF7L2|GSK3B|SMO|BAK1|POLK|FZD5	http://www.genome.jp/kegg-bin/show_pathway?bta05217/bta:514090%09red/bta:538536%09red/bta:790875%09red/bta:541218%09red/bta:539308%09red/bta:445416%09red/bta:615037%09red/bta:540481%09red/bta:445419%09red
Downstream signal transduction	Reactome	R-BTA-186763	4	16	0.0299468	0.101474	PDGFRA|NRAS|NCK1|NCK2	http://www.reactome.org/cgi-bin/eventbrowser_st_id?ST_ID=R-BTA-186763
Glycolysis	Reactome	R-BTA-70171	4	16	0.0299468	0.101474	GNPDA2|PGM2L1|PFKM|PFKFB2	http://www.reactome.org/cgi-bin/eventbrowser_st_id?ST_ID=R-BTA-70171
Interleukin-1 family signaling	Reactome	R-BTA-446652	7	43	0.0303265	0.102318	NKIRAS2|PELI1|IL18R1|MAP3K7|CHUK|UBA52|IL1A	http://www.reactome.org/cgi-bin/eventbrowser_st_id?ST_ID=R-BTA-446652
Signaling by Hedgehog	Reactome	R-BTA-5358351	7	43	0.0303265	0.102318	CDC73|SMO|UBA52|PRKAR1A|PRKACB|RPGRIP1L|TUBB2A	http://www.reactome.org/cgi-bin/eventbrowser_st_id?ST_ID=R-BTA-5358351
Aldosterone synthesis and secretion	KEGG PATHWAY	bta04925	12	96	0.0307012	0.103458	GNAQ|PRKD1|CACNA1D|PRKCE|ATF2|CREB1|ATP1B1|PRKACB|ATP2B1|ATP2B2|ATP2B4|PRKD3	http://www.genome.jp/kegg-bin/show_pathway?bta04925/bta:519758%09red/bta:533270%09red/bta:538447%09red/bta:281713%09red/bta:282641%09red/bta:507041%09red/bta:613800%09red/bta:509827%09red/bta:408013%09red/bta:536654%09red/bta:282323%09red/bta:282146%09red
Insulin secretion	KEGG PATHWAY	bta04911	11	85	0.0308481	0.103878	SNAP25|GNAQ|GCG|CACNA1D|KCNMA1|CREB1|ATP1B1|PCLO|ADCYAP1|PRKACB|ATF2	http://www.genome.jp/kegg-bin/show_pathway?bta04911/bta:519758%09red/bta:281713%09red/bta:517284%09red/bta:540853%09red/bta:282323%09red/bta:509827%09red/bta:280802%09red/bta:408013%09red/bta:536654%09red/bta:615187%09red/bta:282573%09red
Hedgehog 'off' state	Reactome	R-BTA-5610787	6	34	0.0322608	0.106484	SMO|UBA52|PRKAR1A|PRKACB|RPGRIP1L|TUBB2A	http://www.reactome.org/cgi-bin/eventbrowser_st_id?ST_ID=R-BTA-5610787
Glucose metabolism	Reactome	R-BTA-70326	6	34	0.0322608	0.106484	PGM2L1|GNPDA2|PFKFB2|G6PC2|PFKM|SLC25A12	http://www.reactome.org/cgi-bin/eventbrowser_st_id?ST_ID=R-BTA-70326
Asymmetric localization of PCP proteins	Reactome	R-BTA-4608870	3	9	0.0324378	0.106484	UBA52|FZD4|FZD5	http://www.reactome.org/cgi-bin/eventbrowser_st_id?ST_ID=R-BTA-4608870
FOXO-mediated transcription	Reactome	R-BTA-9614085	3	9	0.0324378	0.106484	FOXO3|SIRT1|CREBBP	http://www.reactome.org/cgi-bin/eventbrowser_st_id?ST_ID=R-BTA-9614085
Downregulation of ERBB2 signaling	Reactome	R-BTA-8863795	3	9	0.0324378	0.106484	HBEGF|UBA52|EREG	http://www.reactome.org/cgi-bin/eventbrowser_st_id?ST_ID=R-BTA-8863795
PI3K events in ERBB2 signaling	Reactome	R-BTA-1963642	3	9	0.0324378	0.106484	HBEGF|EREG|GAB1	http://www.reactome.org/cgi-bin/eventbrowser_st_id?ST_ID=R-BTA-1963642
Opioid proenkephalin pathway	PANTHER	P05915	5	25	0.0327683	0.106874	GNB1|GNG2|GNAI3|GNG12|SNAP25	http://www.pantherdb.org/pathway/pathwayDiagram.jsp?catAccession=P05915
Cortocotropin releasing factor receptor signaling pathway	PANTHER	P04380	5	25	0.0327683	0.106874	GNB1|GNG2|GNAQ|GNG12|SNAP25	http://www.pantherdb.org/pathway/pathwayDiagram.jsp?catAccession=P04380
EPH-Ephrin signaling	Reactome	R-BTA-2682334	5	25	0.0327683	0.106874	NCK2|RHOA|EFNA4|WASL|ARPC1A	http://www.reactome.org/cgi-bin/eventbrowser_st_id?ST_ID=R-BTA-2682334
Semaphorin interactions	Reactome	R-BTA-373755	5	25	0.0327683	0.106874	PLXNC1|RHOB|RHOA|CRMP1|PLXNA2	http://www.reactome.org/cgi-bin/eventbrowser_st_id?ST_ID=R-BTA-373755
Activation of kainate receptors upon glutamate binding	Reactome	R-BTA-451326	5	25	0.0327683	0.106874	GNB1|GRIK2|GNG2|DLG3|GNG12	http://www.reactome.org/cgi-bin/eventbrowser_st_id?ST_ID=R-BTA-451326
Signaling by EGFR	Reactome	R-BTA-177929	5	25	0.0327683	0.106874	HBEGF|UBA52|NRAS|EREG|GAB1	http://www.reactome.org/cgi-bin/eventbrowser_st_id?ST_ID=R-BTA-177929
Toll Like Receptor 5 (TLR5) Cascade	Reactome	R-BTA-168176	7	44	0.0333772	0.108058	NKIRAS2|PELI1|CHUK|MAP3K7|UBA52|MAPK10|MAPK9	http://www.reactome.org/cgi-bin/eventbrowser_st_id?ST_ID=R-BTA-168176
MyD88 cascade initiated on plasma membrane	Reactome	R-BTA-975871	7	44	0.0333772	0.108058	NKIRAS2|PELI1|CHUK|MAP3K7|UBA52|MAPK10|MAPK9	http://www.reactome.org/cgi-bin/eventbrowser_st_id?ST_ID=R-BTA-975871
Cortisol synthesis and secretion	KEGG PATHWAY	bta04927	9	65	0.0345939	0.111766	GNAQ|SP1|CACNA1D|CREB1|PRKACB|KCNA4|PDE8A|PDE8B|ATF2	http://www.genome.jp/kegg-bin/show_pathway?bta04927/bta:506787%09red/bta:540741%09red/bta:281713%09red/bta:107131388%09red/bta:281880%09red/bta:282323%09red/bta:509827%09red/bta:408013%09red/bta:536654%09red
Interleukin-1 signaling	Reactome	R-BTA-9020702	6	35	0.0359204	0.113988	NKIRAS2|PELI1|MAP3K7|CHUK|UBA52|IL1A	http://www.reactome.org/cgi-bin/eventbrowser_st_id?ST_ID=R-BTA-9020702
Toll Like Receptor 2 (TLR2) Cascade	Reactome	R-BTA-181438	7	45	0.0366252	0.115497	NKIRAS2|PELI1|CHUK|MAP3K7|UBA52|MAPK10|MAPK9	http://www.reactome.org/cgi-bin/eventbrowser_st_id?ST_ID=R-BTA-181438
MyD88:MAL(TIRAP) cascade initiated on plasma membrane	Reactome	R-BTA-166058	7	45	0.0366252	0.115497	NKIRAS2|PELI1|CHUK|MAP3K7|UBA52|MAPK10|MAPK9	http://www.reactome.org/cgi-bin/eventbrowser_st_id?ST_ID=R-BTA-166058
Protein ubiquitination	Reactome	R-BTA-8852135	7	45	0.0366252	0.115497	UBE2H|UBE2K|CDC73|UBA52|UBE2G1|PEX12|UBE2W	http://www.reactome.org/cgi-bin/eventbrowser_st_id?ST_ID=R-BTA-8852135
Toll Like Receptor 10 (TLR10) Cascade	Reactome	R-BTA-168142	7	45	0.0366252	0.115497	NKIRAS2|PELI1|CHUK|MAP3K7|UBA52|MAPK10|MAPK9	http://www.reactome.org/cgi-bin/eventbrowser_st_id?ST_ID=R-BTA-168142
Toll Like Receptor TLR1:TLR2 Cascade	Reactome	R-BTA-168179	7	45	0.0366252	0.115497	NKIRAS2|PELI1|CHUK|MAP3K7|UBA52|MAPK10|MAPK9	http://www.reactome.org/cgi-bin/eventbrowser_st_id?ST_ID=R-BTA-168179
Toll Like Receptor TLR6:TLR2 Cascade	Reactome	R-BTA-168188	7	45	0.0366252	0.115497	NKIRAS2|PELI1|CHUK|MAP3K7|UBA52|MAPK10|MAPK9	http://www.reactome.org/cgi-bin/eventbrowser_st_id?ST_ID=R-BTA-168188
Opioid prodynorphin pathway	PANTHER	P05916	5	26	0.0371835	0.116449	GNB1|GNG2|GNAI3|GNG12|SNAP25	http://www.pantherdb.org/pathway/pathwayDiagram.jsp?catAccession=P05916
Maturity onset diabetes of the young	KEGG PATHWAY	bta04950	5	26	0.0371835	0.116449	HHEX|HNF4G|NEUROD1|NR5A2|PAX6	http://www.genome.jp/kegg-bin/show_pathway?bta04950/bta:539487%09red/bta:541305%09red/bta:539542%09red/bta:404168%09red/bta:286857%09red
Thrombin signalling through proteinase activated receptors (PARs)	Reactome	R-BTA-456926	5	26	0.0371835	0.116449	GNB1|GNG2|GNAQ|GNG12|F2RL2	http://www.reactome.org/cgi-bin/eventbrowser_st_id?ST_ID=R-BTA-456926
Cell surface interactions at the vascular wall	Reactome	R-BTA-202733	6	36	0.039836	0.122618	ITGB1|CXADR|NRAS|GPC1|COL1A2|COL1A1	http://www.reactome.org/cgi-bin/eventbrowser_st_id?ST_ID=R-BTA-202733
PTEN Regulation	Reactome	R-BTA-6807070	6	36	0.039836	0.122618	PREX2|BMI1|UBA52|PHC3|CBX6|RNF2	http://www.reactome.org/cgi-bin/eventbrowser_st_id?ST_ID=R-BTA-6807070
Cell-Cell communication	Reactome	R-BTA-1500931	6	36	0.039836	0.122618	ACTN1|NCK1|NCK2|FERMT2|WASL|CADM1	http://www.reactome.org/cgi-bin/eventbrowser_st_id?ST_ID=R-BTA-1500931
Alzheimer disease-presenilin pathway	PANTHER	P00004	7	46	0.0400748	0.122618	MMP16|ACTA1|LRP6|FZD5|ACTC1|RBPJ|FZD4	http://www.pantherdb.org/pathway/pathwayDiagram.jsp?catAccession=P00004
TRAF6 mediated induction of NFkB and MAP kinases upon TLR7/8 or 9 activation	Reactome	R-BTA-975138	7	46	0.0400748	0.122618	NKIRAS2|PELI1|CHUK|MAP3K7|UBA52|MAPK10|MAPK9	http://www.reactome.org/cgi-bin/eventbrowser_st_id?ST_ID=R-BTA-975138
Toll Like Receptor 9 (TLR9) Cascade	Reactome	R-BTA-168138	7	46	0.0400748	0.122618	NKIRAS2|PELI1|CHUK|MAP3K7|UBA52|MAPK10|MAPK9	http://www.reactome.org/cgi-bin/eventbrowser_st_id?ST_ID=R-BTA-168138
Toll Like Receptor 7/8 (TLR7/8) Cascade	Reactome	R-BTA-168181	7	46	0.0400748	0.122618	NKIRAS2|PELI1|CHUK|MAP3K7|UBA52|MAPK10|MAPK9	http://www.reactome.org/cgi-bin/eventbrowser_st_id?ST_ID=R-BTA-168181
MyD88 dependent cascade initiated on endosome	Reactome	R-BTA-975155	7	46	0.0400748	0.122618	NKIRAS2|PELI1|CHUK|MAP3K7|UBA52|MAPK10|MAPK9	http://www.reactome.org/cgi-bin/eventbrowser_st_id?ST_ID=R-BTA-975155
Rap1 signalling	Reactome	R-BTA-392517	3	10	0.0403103	0.122618	PRKG1|RAP1B|PRKACB	http://www.reactome.org/cgi-bin/eventbrowser_st_id?ST_ID=R-BTA-392517
Regulation of RAS by GAPs	Reactome	R-BTA-5658442	3	10	0.0403103	0.122618	UBA52|NRAS|RASA2	http://www.reactome.org/cgi-bin/eventbrowser_st_id?ST_ID=R-BTA-5658442
Notch-HLH transcription pathway	Reactome	R-BTA-350054	3	10	0.0403103	0.122618	RBPJ|TBL1XR1|CREBBP	http://www.reactome.org/cgi-bin/eventbrowser_st_id?ST_ID=R-BTA-350054
Histamine H2 receptor mediated signaling pathway	PANTHER	P04386	4	18	0.0410975	0.12352	GNB1|GNG2|GNG12|PRKACB	http://www.pantherdb.org/pathway/pathwayDiagram.jsp?catAccession=P04386
TAK1 activates NFkB by phosphorylation and activation of IKKs complex	Reactome	R-BTA-445989	4	18	0.0410975	0.12352	NKIRAS2|UBA52|CHUK|MAP3K7	http://www.reactome.org/cgi-bin/eventbrowser_st_id?ST_ID=R-BTA-445989
Signaling by TGF-beta Receptor Complex	Reactome	R-BTA-170834	4	18	0.0410975	0.12352	RHOA|MTMR4|UBA52|SKIL	http://www.reactome.org/cgi-bin/eventbrowser_st_id?ST_ID=R-BTA-170834
Ovarian tumor domain proteases	Reactome	R-BTA-5689896	4	18	0.0410975	0.12352	RHOA|OTUD7B|UBA52|TNFAIP3	http://www.reactome.org/cgi-bin/eventbrowser_st_id?ST_ID=R-BTA-5689896
TNF signaling	Reactome	R-BTA-75893	5	27	0.0419458	0.125402	UBA52|OTUD7B|CHUK|TNFAIP3|MAP3K7	http://www.reactome.org/cgi-bin/eventbrowser_st_id?ST_ID=R-BTA-75893
Regulation of TP53 Activity through Phosphorylation	Reactome	R-BTA-6804756	5	27	0.0419458	0.125402	SUPT16H|UBA52|PRKAB2|PRKAA2|HIPK1	http://www.reactome.org/cgi-bin/eventbrowser_st_id?ST_ID=R-BTA-6804756
Chaperonin-mediated protein folding	Reactome	R-BTA-390466	5	27	0.0419458	0.125402	GNB1|GNG2|PDCL|GNG12|GNAI3	http://www.reactome.org/cgi-bin/eventbrowser_st_id?ST_ID=R-BTA-390466
Protein folding	Reactome	R-BTA-391251	5	27	0.0419458	0.125402	GNB1|GNG2|PDCL|GNG12|GNAI3	http://www.reactome.org/cgi-bin/eventbrowser_st_id?ST_ID=R-BTA-391251
Cooperation of PDCL (PhLP1) and TRiC/CCT in G-protein beta folding	Reactome	R-BTA-6814122	5	27	0.0419458	0.125402	GNB1|GNG2|PDCL|GNG12|GNAI3	http://www.reactome.org/cgi-bin/eventbrowser_st_id?ST_ID=R-BTA-6814122
RNA degradation	KEGG PATHWAY	bta03018	10	79	0.0430397	0.128264	PAN2|TOB1|BTG2|BTG1|PABPC5|EDC3|PFKM|PABPC4L|EXOSC8|PAPD5	http://www.genome.jp/kegg-bin/show_pathway?bta03018/bta:101908085%09red/bta:506544%09red/bta:511286%09red/bta:539364%09red/bta:532080%09red/bta:281032%09red/bta:789894%09red/bta:517979%09red/bta:538820%09red/bta:768016%09red
Muscle contraction	Reactome	R-BTA-397014	11	91	0.0450667	0.133711	KCNJ2|ACTA1|ATP2A2|CACNB3|ACTC1|SCN1A|CACNA1D|CACNB4|CACNB2|SORBS1|VIM	http://www.reactome.org/cgi-bin/eventbrowser_st_id?ST_ID=R-BTA-397014
Estrogen signaling pathway	KEGG PATHWAY	bta04915	15	138	0.045382	0.134335	KCNJ3|NCOA2|GNAQ|HSPA2|SP1|NRAS|CREB1|FKBP4|HBEGF|AKT2|AKT3|PRKACB|MAPK1|GNAI3|ATF2	http://www.genome.jp/kegg-bin/show_pathway?bta04915/bta:100137872%09red/bta:540741%09red/bta:506322%09red/bta:281713%09red/bta:526088%09red/bta:281827%09red/bta:539521%09red/bta:282323%09red/bta:522921%09red/bta:509827%09red/bta:508162%09red/bta:534923%09
FGF signaling pathway	PANTHER	P00021	8	58	0.0456032	0.134679	MAP3K2|NRAS|FGF2|SPRY3|AKT3|MAPK10|YWHAG|RASA2	http://www.pantherdb.org/pathway/pathwayDiagram.jsp?catAccession=P00021
Long-term potentiation	KEGG PATHWAY	bta04720	9	69	0.0461761	0.136057	RPS6KA3|GNAQ|PPP3R1|GRIA1|NRAS|RAP1B|MAPK1|PRKACB|CREBBP	http://www.genome.jp/kegg-bin/show_pathway?bta04720/bta:511190%09red/bta:506322%09red/bta:505453%09red/bta:282321%09red/bta:282323%09red/bta:327708%09red/bta:327672%09red/bta:536654%09red/bta:529618%09red
RHO GTPase Effectors	Reactome	R-BTA-195258	18	175	0.0463655	0.136587	MYH10|NCOA2|SRF|NCK1|ABI2|DAAM1|ARPC1A|DSN1|GOPC|CENPK|DYNC1I1|WASL|BAIAP2|RHOB|RHOA|CYBB|TUBB2A|TAOK1	http://www.reactome.org/cgi-bin/eventbrowser_st_id?ST_ID=R-BTA-195258
Ubiquitin proteasome pathway	PANTHER	P00060	5	28	0.0470589	0.138081	UBE2E3|UBE2K|UBE3A|UBE2D3|UBE2G1	http://www.pantherdb.org/pathway/pathwayDiagram.jsp?catAccession=P00060
Amino acid transport across the plasma membrane	Reactome	R-BTA-352230	4	19	0.0474399	0.138479	SLC38A2|SLC6A15|SLC7A8|SLC6A14	http://www.reactome.org/cgi-bin/eventbrowser_st_id?ST_ID=R-BTA-352230
Detoxification of Reactive Oxygen Species	Reactome	R-BTA-3299685	4	19	0.0474399	0.138479	CYBB|GPX8|GPX7|ERO1A	http://www.reactome.org/cgi-bin/eventbrowser_st_id?ST_ID=R-BTA-3299685
GPVI-mediated activation cascade	Reactome	R-BTA-114604	4	19	0.0474399	0.138479	RHOB|RHOA|COL1A2|COL1A1	http://www.reactome.org/cgi-bin/eventbrowser_st_id?ST_ID=R-BTA-114604
PI5P, PP2A and IER3 Regulate PI3K/AKT Signaling	Reactome	R-BTA-6811558	7	48	0.0475915	0.138806	PDGFRA|KL|HBEGF|EREG|KITLG|GAB1|FGF2	http://www.reactome.org/cgi-bin/eventbrowser_st_id?ST_ID=R-BTA-6811558
Negative regulation of the PI3K/AKT network	Reactome	R-BTA-199418	7	48	0.0475915	0.138806	PDGFRA|KL|HBEGF|EREG|KITLG|GAB1|FGF2	http://www.reactome.org/cgi-bin/eventbrowser_st_id?ST_ID=R-BTA-199418
Hepatitis C	KEGG PATHWAY	bta05160	17	164	0.0490077	0.140417	PPP2R1B|STAT3|STAT1|IFNG|EIF2AK3|BAK1|NRAS|PSME3|PPP2R2C|CHUK|MAPK1|AKT2|AKT3|CLDN1|GSK3B|YWHAG|APAF1	http://www.genome.jp/kegg-bin/show_pathway?bta05160/bta:535820%09red/bta:514090%09red/bta:100137872%09red/bta:508541%09red/bta:286862%09red/bta:506322%09red/bta:790875%09red/bta:281237%09red/bta:414922%09red/bta:537782%09red/bta:510814%09red/bta:281073%09
IRAK1 recruits IKK complex upon TLR7/8 or 9 stimulation	Reactome	R-BTA-975144	3	11	0.0490505	0.140417	UBA52|PELI1|CHUK	http://www.reactome.org/cgi-bin/eventbrowser_st_id?ST_ID=R-BTA-975144
GAB1 signalosome	Reactome	R-BTA-180292	3	11	0.0490505	0.140417	HBEGF|EREG|GAB1	http://www.reactome.org/cgi-bin/eventbrowser_st_id?ST_ID=R-BTA-180292
Transcriptional regulation by RUNX2	Reactome	R-BTA-8878166	3	11	0.0490505	0.140417	CBFB|UBA52|PPM1D	http://www.reactome.org/cgi-bin/eventbrowser_st_id?ST_ID=R-BTA-8878166
IRAK1 recruits IKK complex	Reactome	R-BTA-937039	3	11	0.0490505	0.140417	UBA52|PELI1|CHUK	http://www.reactome.org/cgi-bin/eventbrowser_st_id?ST_ID=R-BTA-937039
Fc epsilon RI signaling pathway	KEGG PATHWAY	bta04664	9	70	0.0494303	0.141247	VAV3|VAV2|NRAS|PLCG2|AKT2|AKT3|MAPK10|MAPK1|MAPK9	http://www.genome.jp/kegg-bin/show_pathway?bta04664/bta:515718%09red/bta:100337091%09red/bta:100137872%09red/bta:521961%09red/bta:506322%09red/bta:537631%09red/bta:534125%09red/bta:534923%09red/bta:327672%09red
Epstein-Barr virus infection	KEGG PATHWAY	bta05169	22	228	0.051706	0.147421	CDKN1B|PLCG2|AKT2|AKT3|MAPK10|VIM|POLK|STAT3|STAT1|CCNE2|RBPJ|NEDD4|MAP3K7|PSMC2|MAPK9|APAF1|CHUK|MDM2|CCND2|TNFAIP3|BAK1|PSMC6	http://www.genome.jp/kegg-bin/show_pathway?bta05169/bta:508105%09red/bta:534125%09red/bta:510814%09red/bta:507781%09red/bta:540378%09red/bta:100137872%09red/bta:537782%09red/bta:514090%09red/bta:534923%09red/bta:508541%09red/bta:615414%09red/bta:100337091
Regulation of actin dynamics for phagocytic cup formation	Reactome	R-BTA-2029482	5	29	0.052525	0.149092	ABI2|BAIAP2|ARPC1A|WASL|NCK1	http://www.reactome.org/cgi-bin/eventbrowser_st_id?ST_ID=R-BTA-2029482
Signal amplification	Reactome	R-BTA-392518	5	29	0.052525	0.149092	GNB1|GNG2|GNAQ|GNG12|GNAI3	http://www.reactome.org/cgi-bin/eventbrowser_st_id?ST_ID=R-BTA-392518
Regulation of TP53 Activity	Reactome	R-BTA-5633007	8	60	0.0528735	0.149569	HIPK1|PRKAB2|SGK1|SUPT16H|PRKAA2|UBA52|RNF34|ING2	http://www.reactome.org/cgi-bin/eventbrowser_st_id?ST_ID=R-BTA-5633007
Glycosaminoglycan biosynthesis - chondroitin sulfate / dermatan sulfate	KEGG PATHWAY	bta00532	4	20	0.0542919	0.152147	DSE|UST|CHSY3|CHSY1	http://www.genome.jp/kegg-bin/show_pathway?bta00532/bta:535975%09red/bta:528149%09red/bta:281690%09red/bta:514028%09red
G beta:gamma signalling through PI3Kgamma	Reactome	R-BTA-392451	4	20	0.0542919	0.152147	GNB1|RHOA|GNG2|GNG12	http://www.reactome.org/cgi-bin/eventbrowser_st_id?ST_ID=R-BTA-392451
Cyclin D associated events in G1	Reactome	R-BTA-69231	4	20	0.0542919	0.152147	CDKN1B|UBA52|CCND2|TFDP1	http://www.reactome.org/cgi-bin/eventbrowser_st_id?ST_ID=R-BTA-69231
Voltage gated Potassium channels	Reactome	R-BTA-1296072	4	20	0.0542919	0.152147	KCNH5|KCNS2|KCNV1|KCNA1	http://www.reactome.org/cgi-bin/eventbrowser_st_id?ST_ID=R-BTA-1296072
G1 Phase	Reactome	R-BTA-69236	4	20	0.0542919	0.152147	CDKN1B|UBA52|CCND2|TFDP1	http://www.reactome.org/cgi-bin/eventbrowser_st_id?ST_ID=R-BTA-69236
Nicotinic acetylcholine receptor signaling pathway	PANTHER	P00044	6	40	0.0581278	0.159606	MYH10|SNAP25|ACTA1|ACTC1|CACNA1D|ACTR1A	http://www.pantherdb.org/pathway/pathwayDiagram.jsp?catAccession=P00044
Thyroid cancer	KEGG PATHWAY	bta05216	6	40	0.0581278	0.159606	NRAS|TCF7L2|BAK1|MAPK1|CDH1|POLK	http://www.genome.jp/kegg-bin/show_pathway?bta05216/bta:514090%09red/bta:541218%09red/bta:506322%09red/bta:327672%09red/bta:540481%09red/bta:282637%09red
Carbohydrate digestion and absorption	KEGG PATHWAY	bta04973	6	40	0.0581278	0.159606	LCT|CACNA1D|G6PC2|AKT2|AKT3|ATP1B1	http://www.genome.jp/kegg-bin/show_pathway?bta04973/bta:519758%09red/bta:100137872%09red/bta:505012%09red/bta:514332%09red/bta:408013%09red/bta:534923%09red
Toll Like Receptor 3 (TLR3) Cascade	Reactome	R-BTA-168164	6	40	0.0581278	0.159606	NKIRAS2|CHUK|MAP3K7|UBA52|MAPK10|MAPK9	http://www.reactome.org/cgi-bin/eventbrowser_st_id?ST_ID=R-BTA-168164
CLEC7A (Dectin-1) signaling	Reactome	R-BTA-5607764	5	30	0.0583447	0.159606	MAP3K7|UBA52|PPP3R1|MALT1|CHUK	http://www.reactome.org/cgi-bin/eventbrowser_st_id?ST_ID=R-BTA-5607764
MAPK6/MAPK4 signaling	Reactome	R-BTA-5687128	3	12	0.0586296	0.159606	FOXO3|UBA52|PRKACB	http://www.reactome.org/cgi-bin/eventbrowser_st_id?ST_ID=R-BTA-5687128
FCERI mediated MAPK activation	Reactome	R-BTA-2871796	3	12	0.0586296	0.159606	MAPK10|MAPK9|NRAS	http://www.reactome.org/cgi-bin/eventbrowser_st_id?ST_ID=R-BTA-2871796
G1/S DNA Damage Checkpoints	Reactome	R-BTA-69615	3	12	0.0586296	0.159606	CDKN1B|UBA52|CHEK1	http://www.reactome.org/cgi-bin/eventbrowser_st_id?ST_ID=R-BTA-69615
5HT4 type receptor mediated signaling pathway	PANTHER	P04376	4	21	0.0616485	0.164503	GNB1|GNG2|GNG12|SNAP25	http://www.pantherdb.org/pathway/pathwayDiagram.jsp?catAccession=P04376
Beta3 adrenergic receptor signaling pathway	PANTHER	P04379	4	21	0.0616485	0.164503	GNB1|GNG2|GNG12|SNAP25	http://www.pantherdb.org/pathway/pathwayDiagram.jsp?catAccession=P04379
Terpenoid backbone biosynthesis	KEGG PATHWAY	bta00900	4	21	0.0616485	0.164503	PCYOX1|IDI1|HMGCS2|HMGCR	http://www.genome.jp/kegg-bin/show_pathway?bta00900/bta:503684%09red/bta:100125835%09red/bta:514293%09red/bta:407159%09red
Retrograde transport at the Trans-Golgi-Network	Reactome	R-BTA-6811440	4	21	0.0616485	0.164503	GOLGA1|TMF1|SCOC|VPS54	http://www.reactome.org/cgi-bin/eventbrowser_st_id?ST_ID=R-BTA-6811440
Downstream TCR signaling	Reactome	R-BTA-202424	4	21	0.0616485	0.164503	UBA52|CHUK|MALT1|MAP3K7	http://www.reactome.org/cgi-bin/eventbrowser_st_id?ST_ID=R-BTA-202424
FCERI mediated NF-kB activation	Reactome	R-BTA-2871837	4	21	0.0616485	0.164503	UBA52|CHUK|MALT1|MAP3K7	http://www.reactome.org/cgi-bin/eventbrowser_st_id?ST_ID=R-BTA-2871837
ADP signalling through P2Y purinoceptor 12	Reactome	R-BTA-392170	4	21	0.0616485	0.164503	GNB1|GNG2|GNAI3|GNG12	http://www.reactome.org/cgi-bin/eventbrowser_st_id?ST_ID=R-BTA-392170
Cytosolic sensors of pathogen-associated DNA	Reactome	R-BTA-1834949	4	21	0.0616485	0.164503	NKIRAS2|UBA52|CHUK|CREBBP	http://www.reactome.org/cgi-bin/eventbrowser_st_id?ST_ID=R-BTA-1834949
Phagosome	KEGG PATHWAY	bta04145	17	170	0.0627539	0.164503	ITGB1|SEC22B|DYNC1LI2|NCF2|EEA1|RAB5B|THBS2|SEC61A1|CYBB|DYNC1I1|CTSV|ATP6V1G1|ATP6V1C2|TUBB2A|LAMP2|CANX|MSR1	http://www.genome.jp/kegg-bin/show_pathway?bta04145/bta:539150%09red/bta:281346%09red/bta:613724%09red/bta:100295973%09red/bta:505064%09red/bta:516259%09red/bta:614775%09red/bta:281108%09red/bta:407129%09red/bta:281311%09red/bta:281112%09red/bta:529148%09
VEGF binds to VEGFR leading to receptor dimerization	Reactome	R-BTA-195399	2	5	0.0629725	0.164503	KDR|VEGFC	http://www.reactome.org/cgi-bin/eventbrowser_st_id?ST_ID=R-BTA-195399
Apoptotic cleavage of cellular proteins	Reactome	R-BTA-111465	2	5	0.0629725	0.164503	SATB1|VIM	http://www.reactome.org/cgi-bin/eventbrowser_st_id?ST_ID=R-BTA-111465
Activation of the AP-1 family of transcription factors	Reactome	R-BTA-450341	2	5	0.0629725	0.164503	MAPK9|MAPK10	http://www.reactome.org/cgi-bin/eventbrowser_st_id?ST_ID=R-BTA-450341
VEGF ligand-receptor interactions	Reactome	R-BTA-194313	2	5	0.0629725	0.164503	KDR|VEGFC	http://www.reactome.org/cgi-bin/eventbrowser_st_id?ST_ID=R-BTA-194313
GP1b-IX-V activation signalling	Reactome	R-BTA-430116	2	5	0.0629725	0.164503	COL1A2|COL1A1	http://www.reactome.org/cgi-bin/eventbrowser_st_id?ST_ID=R-BTA-430116
DCC mediated attractive signaling	Reactome	R-BTA-418885	2	5	0.0629725	0.164503	WASL|NCK1	http://www.reactome.org/cgi-bin/eventbrowser_st_id?ST_ID=R-BTA-418885
BH3-only proteins associate with and inactivate anti-apoptotic BCL-2 members	Reactome	R-BTA-111453	2	5	0.0629725	0.164503	BCL2L1|BMF	http://www.reactome.org/cgi-bin/eventbrowser_st_id?ST_ID=R-BTA-111453
Ubiquitin Mediated Degradation of Phosphorylated Cdc25A	Reactome	R-BTA-69601	2	5	0.0629725	0.164503	UBA52|CHEK1	http://www.reactome.org/cgi-bin/eventbrowser_st_id?ST_ID=R-BTA-69601
PI3K events in ERBB4 signaling	Reactome	R-BTA-1250342	2	5	0.0629725	0.164503	HBEGF|EREG	http://www.reactome.org/cgi-bin/eventbrowser_st_id?ST_ID=R-BTA-1250342
p53-Independent G1/S DNA damage checkpoint	Reactome	R-BTA-69613	2	5	0.0629725	0.164503	UBA52|CHEK1	http://www.reactome.org/cgi-bin/eventbrowser_st_id?ST_ID=R-BTA-69613
p53-Independent DNA Damage Response	Reactome	R-BTA-69610	2	5	0.0629725	0.164503	UBA52|CHEK1	http://www.reactome.org/cgi-bin/eventbrowser_st_id?ST_ID=R-BTA-69610
RAB GEFs exchange GTP for GDP on RABs	Reactome	R-BTA-8876198	6	41	0.0633688	0.165386	RAB5B|ALS2|RAB18|DENND5B|GDI2|RAB14	http://www.reactome.org/cgi-bin/eventbrowser_st_id?ST_ID=R-BTA-8876198
Transport of inorganic cations/anions and amino acids/oligopeptides	Reactome	R-BTA-425393	7	52	0.0651645	0.169039	SLC7A8|SLC38A2|SLC17A6|SLC12A5|SLC26A7|SLC6A15|SLC6A14	http://www.reactome.org/cgi-bin/eventbrowser_st_id?ST_ID=R-BTA-425393
Cell adhesion molecules (CAMs)	KEGG PATHWAY	bta04514	16	159	0.0666596	0.172822	ITGB1|CD28|LRRC4|NECTIN3|NRCAM|ITGB8|NLGN1|NRXN3|NEGR1|GLG1|ALCAM|CDH1|CLDN1|CDH2|MPZ|CADM1	http://www.genome.jp/kegg-bin/show_pathway?bta04514/bta:534500%09red/bta:536286%09red/bta:281196%09red/bta:525767%09red/bta:529873%09red/bta:281050%09red/bta:534360%09red/bta:414922%09red/bta:530042%09red/bta:281062%09red/bta:281614%09red/bta:614412%09red
Activation of NF-kappaB in B cells	Reactome	R-BTA-1169091	3	13	0.0690127	0.176841	UBA52|CHUK|MALT1	http://www.reactome.org/cgi-bin/eventbrowser_st_id?ST_ID=R-BTA-1169091
Glycogen metabolism	Reactome	R-BTA-8982491	3	13	0.0690127	0.176841	PGM2L1|AGL|PPP1R3C	http://www.reactome.org/cgi-bin/eventbrowser_st_id?ST_ID=R-BTA-8982491
Regulation of mRNA stability by proteins that bind AU-rich elements	Reactome	R-BTA-450531	4	22	0.0695018	0.176928	UBA52|ELAVL1|EXOSC8|ZFP36L1	http://www.reactome.org/cgi-bin/eventbrowser_st_id?ST_ID=R-BTA-450531
Thromboxane signalling through TP receptor	Reactome	R-BTA-428930	4	22	0.0695018	0.176928	GNB1|GNG2|GNAQ|GNG12	http://www.reactome.org/cgi-bin/eventbrowser_st_id?ST_ID=R-BTA-428930
NOD1/2 Signaling Pathway	Reactome	R-BTA-168638	4	22	0.0695018	0.176928	UBA52|CHUK|TNFAIP3|MAP3K7	http://www.reactome.org/cgi-bin/eventbrowser_st_id?ST_ID=R-BTA-168638
Regulation of TNFR1 signaling	Reactome	R-BTA-5357905	4	22	0.0695018	0.176928	UBA52|OTUD7B|CHUK|TNFAIP3	http://www.reactome.org/cgi-bin/eventbrowser_st_id?ST_ID=R-BTA-5357905
Lysine degradation	KEGG PATHWAY	bta00310	8	64	0.069536	0.176928	KMT2C|ASH1L|KMT5B|KMT5A|SETDB2|SETD2|PRDM9|SETD7	http://www.genome.jp/kegg-bin/show_pathway?bta00310/bta:509382%09red/bta:532622%09red/bta:539860%09red/bta:789336%09red/bta:515928%09red/bta:767828%09red/bta:100190914%09red/bta:540563%09red
Oxidative Stress Induced Senescence	Reactome	R-BTA-2559580	7	53	0.0700955	0.178094	BMI1|UBA52|MAPK10|PHC3|CBX6|MAPK9|RNF2	http://www.reactome.org/cgi-bin/eventbrowser_st_id?ST_ID=R-BTA-2559580
Toll Like Receptor 4 (TLR4) Cascade	Reactome	R-BTA-166016	7	53	0.0700955	0.178094	NKIRAS2|PELI1|CHUK|MAP3K7|UBA52|MAPK10|MAPK9	http://www.reactome.org/cgi-bin/eventbrowser_st_id?ST_ID=R-BTA-166016
Prion diseases	KEGG PATHWAY	bta05020	5	32	0.0710411	0.179945	IL1A|LAMC1|EGR1|MAPK1|PRKACB	http://www.genome.jp/kegg-bin/show_pathway?bta05020/bta:532572%09red/bta:327672%09red/bta:282323%09red/bta:281250%09red/bta:407125%09red
Leishmaniasis	KEGG PATHWAY	bta05140	9	76	0.0721047	0.182214	ITGB1|NCF2|TGFB2|STAT1|IFNG|MAP3K7|CYBB|MAPK1|IL1A	http://www.genome.jp/kegg-bin/show_pathway?bta05140/bta:281346%09red/bta:534069%09red/bta:281237%09red/bta:281250%09red/bta:510814%09red/bta:529146%09red/bta:281112%09red/bta:327672%09red/bta:281876%09red
Bladder cancer	KEGG PATHWAY	bta05219	6	43	0.0746568	0.187654	NRAS|HBEGF|MAPK1|VEGFA|CDH1|MDM2	http://www.genome.jp/kegg-bin/show_pathway?bta05219/bta:281572%09red/bta:506322%09red/bta:522921%09red/bta:327672%09red/bta:540378%09red/bta:282637%09red
Metabolism of nucleotides	Reactome	R-BTA-15869	6	43	0.0746568	0.187654	ATIC|DCK|CMPK1|AK4|UPB1|NT5C2	http://www.reactome.org/cgi-bin/eventbrowser_st_id?ST_ID=R-BTA-15869
Thermogenesis	KEGG PATHWAY	bta04714	22	239	0.0748571	0.188124	NDUFB6|PRKAG2|PRKAA2|CNR1|NRAS|PPARGC1A|PRKG1|NDUFA5|PRKAB2|GCG|RPS6KB1|CREB1|SMARCD1|COX7A2L|RPS6KA3|ACSL3|ACSL6|ACSL4|NDUFS2|PRKACB|SDHD|ATF2	http://www.genome.jp/kegg-bin/show_pathway?bta04714/bta:506059%09red/bta:281713%09red/bta:282323%09red/bta:280802%09red/bta:338446%09red/bta:511190%09red/bta:504219%09red/bta:512665%09red/bta:404181%09red/bta:327714%09red/bta:538954%09red/bta:327665%09red
Neurotransmitter release cycle	Reactome	R-BTA-112310	4	23	0.0778417	0.192222	LIN7A|LIN7C|CASK|SLC38A2	http://www.reactome.org/cgi-bin/eventbrowser_st_id?ST_ID=R-BTA-112310
Signaling by FGFR4	Reactome	R-BTA-5654743	4	23	0.0778417	0.192222	UBA52|NRAS|FGF2|GAB1	http://www.reactome.org/cgi-bin/eventbrowser_st_id?ST_ID=R-BTA-5654743
Glucagon-type ligand receptors	Reactome	R-BTA-420092	4	23	0.0778417	0.192222	GNB1|GNG2|GCG|GNG12	http://www.reactome.org/cgi-bin/eventbrowser_st_id?ST_ID=R-BTA-420092
G-protein beta:gamma signalling	Reactome	R-BTA-397795	4	23	0.0778417	0.192222	GNB1|RHOA|GNG2|GNG12	http://www.reactome.org/cgi-bin/eventbrowser_st_id?ST_ID=R-BTA-397795
G-protein activation	Reactome	R-BTA-202040	4	23	0.0778417	0.192222	GNB1|GNG2|GNAI3|GNG12	http://www.reactome.org/cgi-bin/eventbrowser_st_id?ST_ID=R-BTA-202040
Synthesis of substrates in N-glycan biosythesis	Reactome	R-BTA-446219	5	33	0.0779125	0.192222	DOLPP1|NANP|FPGT|ST6GAL2|ST8SIA2	http://www.reactome.org/cgi-bin/eventbrowser_st_id?ST_ID=R-BTA-446219
Class B/2 (Secretin family receptors)	Reactome	R-BTA-373080	5	33	0.0779125	0.192222	GCG|GNB1|GNG2|PTHLH|GNG12	http://www.reactome.org/cgi-bin/eventbrowser_st_id?ST_ID=R-BTA-373080
Jak-STAT signaling pathway	KEGG PATHWAY	bta04630	19	202	0.0798341	0.192222	IFNW1|PDGFA|PDGFRA|SOCS6|STAT3|STAT1|IFNG|IL7R|CCND2|IL6ST|PIAS2|AKT2|AKT3|MCL1|BCL2L1|PTPN2|IL6R|CREBBP|LIFR	http://www.genome.jp/kegg-bin/show_pathway?bta04630/bta:522155%09red/bta:281847%09red/bta:539504%09red/bta:281237%09red/bta:788087%09red/bta:505908%09red/bta:540888%09red/bta:282152%09red/bta:510814%09red/bta:100137872%09red/bta:507359%09red/bta:615146%09
N-glycan antennae elongation in the medial/trans-Golgi	Reactome	R-BTA-975576	3	14	0.0801602	0.192222	MGAT2|ST8SIA2|B4GALT6	http://www.reactome.org/cgi-bin/eventbrowser_st_id?ST_ID=R-BTA-975576
RUNX1 regulates transcription of genes involved in differentiation of HSCs	Reactome	R-BTA-8939236	3	14	0.0801602	0.192222	UBA52|CBFB|LMO2	http://www.reactome.org/cgi-bin/eventbrowser_st_id?ST_ID=R-BTA-8939236
Synthesis of very long-chain fatty acyl-CoAs	Reactome	R-BTA-75876	3	14	0.0801602	0.192222	ELOVL6|ACSL3|ACSL6	http://www.reactome.org/cgi-bin/eventbrowser_st_id?ST_ID=R-BTA-75876
Sema4D induced cell migration and growth-cone collapse	Reactome	R-BTA-416572	2	6	0.0806618	0.192222	RHOB|RHOA	http://www.reactome.org/cgi-bin/eventbrowser_st_id?ST_ID=R-BTA-416572
ABC transporters in lipid homeostasis	Reactome	R-BTA-1369062	2	6	0.0806618	0.192222	ABCD3|ABCA3	http://www.reactome.org/cgi-bin/eventbrowser_st_id?ST_ID=R-BTA-1369062
GLI3 is processed to GLI3R by the proteasome	Reactome	R-BTA-5610785	2	6	0.0806618	0.192222	UBA52|PRKACB	http://www.reactome.org/cgi-bin/eventbrowser_st_id?ST_ID=R-BTA-5610785
SHC1 events in ERBB2 signaling	Reactome	R-BTA-1250196	2	6	0.0806618	0.192222	HBEGF|EREG	http://www.reactome.org/cgi-bin/eventbrowser_st_id?ST_ID=R-BTA-1250196
ERBB2 Activates PTK6 Signaling	Reactome	R-BTA-8847993	2	6	0.0806618	0.192222	HBEGF|EREG	http://www.reactome.org/cgi-bin/eventbrowser_st_id?ST_ID=R-BTA-8847993
Oncogene Induced Senescence	Reactome	R-BTA-2559585	2	6	0.0806618	0.192222	UBA52|ETS1	http://www.reactome.org/cgi-bin/eventbrowser_st_id?ST_ID=R-BTA-2559585
Attachment of GPI anchor to uPAR	Reactome	R-BTA-162791	2	6	0.0806618	0.192222	PGAP1|PIGK	http://www.reactome.org/cgi-bin/eventbrowser_st_id?ST_ID=R-BTA-162791
Interleukin-27 signaling	Reactome	R-BTA-9020956	2	6	0.0806618	0.192222	CANX|IL6ST	http://www.reactome.org/cgi-bin/eventbrowser_st_id?ST_ID=R-BTA-9020956
Lipophagy	Reactome	R-BTA-9613354	2	6	0.0806618	0.192222	PRKAB2|PRKAA2	http://www.reactome.org/cgi-bin/eventbrowser_st_id?ST_ID=R-BTA-9613354
Receptor-type tyrosine-protein phosphatases	Reactome	R-BTA-388844	2	6	0.0806618	0.192222	SLITRK6|SLITRK2	http://www.reactome.org/cgi-bin/eventbrowser_st_id?ST_ID=R-BTA-388844
Glycogen synthesis	Reactome	R-BTA-3322077	2	6	0.0806618	0.192222	PGM2L1|PPP1R3C	http://www.reactome.org/cgi-bin/eventbrowser_st_id?ST_ID=R-BTA-3322077
Signaling by Insulin receptor	Reactome	R-BTA-74752	6	44	0.0807018	0.192222	GAB1|PDE3B|ATP6V1G1|ATP6V1C2|KL|FGF2	http://www.reactome.org/cgi-bin/eventbrowser_st_id?ST_ID=R-BTA-74752
Processing of Capped Intron-Containing Pre-mRNA	Reactome	R-BTA-72203	15	152	0.0831785	0.197821	SRSF5|SNRPB2|THOC1|ELAVL1|SRSF2|RBMX|NXF1|PPIL3|HNRNPH1|PCBP1|PTBP1|GLE1|NUP210|CPSF2|WBP4	http://www.reactome.org/cgi-bin/eventbrowser_st_id?ST_ID=R-BTA-72203
Metabolic pathways	KEGG PATHWAY	bta01100	109	1468	0.0838887	0.199147	PGAP1|PGM2L1|AGL|AGK|GNPDA2|IDI1|IPMK|CHSY3|CHSY1|P4HA2|RIMKLB|UPB1|B3GNT5|DCK|AHCYL2|INPP4B|GUCY1A2|SPTLC2|SPTLC1|MTMR4|MTMR3|B3GALT1|MTM1|ENPP4|ENPP3|CDO1|PIK3C2A|HMGCR|PAFAH1B1|PDE8A|PDE8B|DGKH|ATIC|ACSL3|ACSL6|ACSL4|NT5C2|PTEN|UGCG|G6PC2|PAH|TPK1|AK4|	http://www.genome.jp/kegg-bin/show_pathway?bta01100/bta:506059%09red/bta:788066%09red/bta:317723%09red/bta:537533%09red/bta:523311%09red/bta:511575%09red/bta:508700%09red/bta:525335%09red/bta:508327%09red/bta:506343%09red/bta:507327%09red/bta:517397%09red
Amphetamine addiction	KEGG PATHWAY	bta05031	8	67	0.08392	0.199147	SIRT1|PPP3R1|GRIA3|GRIA1|CACNA1D|CREB1|PRKACB|ATF2	http://www.genome.jp/kegg-bin/show_pathway?bta05031/bta:534626%09red/bta:281713%09red/bta:282321%09red/bta:282323%09red/bta:509827%09red/bta:408013%09red/bta:529618%09red/bta:613629%09red
Platelet degranulation	Reactome	R-BTA-114608	8	67	0.08392	0.199147	CDC37L1|ACTN1|IGF1|VEGFC|TGFB2|PCDH7|SPARC|TMX3	http://www.reactome.org/cgi-bin/eventbrowser_st_id?ST_ID=R-BTA-114608
PLC beta mediated events	Reactome	R-BTA-112043	4	24	0.0866558	0.202705	PDE1A|GNAI3|PRKAR1A|PRKACB	http://www.reactome.org/cgi-bin/eventbrowser_st_id?ST_ID=R-BTA-112043
Intrinsic Pathway for Apoptosis	Reactome	R-BTA-109606	4	24	0.0866558	0.202705	BCL2L1|BMF|PPP3R1|BAK1	http://www.reactome.org/cgi-bin/eventbrowser_st_id?ST_ID=R-BTA-109606
G-protein mediated events	Reactome	R-BTA-112040	4	24	0.0866558	0.202705	PDE1A|GNAI3|PRKAR1A|PRKACB	http://www.reactome.org/cgi-bin/eventbrowser_st_id?ST_ID=R-BTA-112040
G alpha (z) signalling events	Reactome	R-BTA-418597	4	24	0.0866558	0.202705	GNB1|RGS17|GNG2|GNG12	http://www.reactome.org/cgi-bin/eventbrowser_st_id?ST_ID=R-BTA-418597
ADP signalling through P2Y purinoceptor 1	Reactome	R-BTA-418592	4	24	0.0866558	0.202705	GNB1|GNG2|GNAQ|GNG12	http://www.reactome.org/cgi-bin/eventbrowser_st_id?ST_ID=R-BTA-418592
Chagas disease (American trypanosomiasis)	KEGG PATHWAY	bta05142	12	116	0.0885273	0.206637	PPP2R1B|GNAQ|IFNG|CHUK|PPP2R2C|AKT2|AKT3|MAPK10|MAPK1|MAPK9|GNAI3|TGFB2	http://www.genome.jp/kegg-bin/show_pathway?bta05142/bta:534069%09red/bta:100137872%09red/bta:281237%09red/bta:281073%09red/bta:100138150%09red/bta:539521%09red/bta:537631%09red/bta:534125%09red/bta:534923%09red/bta:536654%09red/bta:782110%09red/bta:327672
Hedgehog 'on' state	Reactome	R-BTA-5632684	3	15	0.0920285	0.212836	SMO|UBA52|CDC73	http://www.reactome.org/cgi-bin/eventbrowser_st_id?ST_ID=R-BTA-5632684
Regulation of TP53 Degradation	Reactome	R-BTA-6804757	3	15	0.0920285	0.212836	RNF34|UBA52|SGK1	http://www.reactome.org/cgi-bin/eventbrowser_st_id?ST_ID=R-BTA-6804757
SHC-mediated cascade:FGFR1	Reactome	R-BTA-5654688	3	15	0.0920285	0.212836	NRAS|FGF2|KL	http://www.reactome.org/cgi-bin/eventbrowser_st_id?ST_ID=R-BTA-5654688
Negative regulation of MAPK pathway	Reactome	R-BTA-5675221	3	15	0.0920285	0.212836	UBA52|NRAS|PAQR3	http://www.reactome.org/cgi-bin/eventbrowser_st_id?ST_ID=R-BTA-5675221
Cellular response to hypoxia	Reactome	R-BTA-1234174	3	15	0.0920285	0.212836	HIF3A|UBA52|CREBBP	http://www.reactome.org/cgi-bin/eventbrowser_st_id?ST_ID=R-BTA-1234174
Class I peroxisomal membrane protein import	Reactome	R-BTA-9603798	3	15	0.0920285	0.212836	SLC25A17|ABCD3|PEX12	http://www.reactome.org/cgi-bin/eventbrowser_st_id?ST_ID=R-BTA-9603798
EGFR downregulation	Reactome	R-BTA-182971	3	15	0.0920285	0.212836	HBEGF|UBA52|EREG	http://www.reactome.org/cgi-bin/eventbrowser_st_id?ST_ID=R-BTA-182971
Regulation of TP53 Expression and Degradation	Reactome	R-BTA-6806003	3	15	0.0920285	0.212836	RNF34|UBA52|SGK1	http://www.reactome.org/cgi-bin/eventbrowser_st_id?ST_ID=R-BTA-6806003
Type II diabetes mellitus	KEGG PATHWAY	bta04930	6	46	0.0935839	0.215514	CACNA1D|CACNA1B|PRKCE|MAPK1|MAPK10|MAPK9	http://www.genome.jp/kegg-bin/show_pathway?bta04930/bta:282410%09red/bta:507041%09red/bta:537631%09red/bta:534125%09red/bta:408013%09red/bta:327672%09red
Endocrine and other factor-regulated calcium reabsorption	KEGG PATHWAY	bta04961	6	46	0.0935839	0.215514	GNAQ|ATP1B1|RAB11A|PRKACB|SLC8A1|KL	http://www.genome.jp/kegg-bin/show_pathway?bta04961/bta:337925%09red/bta:519758%09red/bta:784635%09red/bta:534708%09red/bta:282323%09red/bta:536654%09red
TRIF(TICAM1)-mediated TLR4 signaling	Reactome	R-BTA-937061	6	46	0.0935839	0.215514	NKIRAS2|CHUK|MAP3K7|UBA52|MAPK10|MAPK9	http://www.reactome.org/cgi-bin/eventbrowser_st_id?ST_ID=R-BTA-937061
MyD88-independent TLR4 cascade	Reactome	R-BTA-166166	6	46	0.0935839	0.215514	NKIRAS2|CHUK|MAP3K7|UBA52|MAPK10|MAPK9	http://www.reactome.org/cgi-bin/eventbrowser_st_id?ST_ID=R-BTA-166166
Inflammatory bowel disease (IBD)	KEGG PATHWAY	bta05321	8	69	0.0944091	0.21713	TGFB2|STAT3|STAT1|IFNG|IL18R1|RORA|MAF|IL1A	http://www.genome.jp/kegg-bin/show_pathway?bta05321/bta:534069%09red/bta:281237%09red/bta:281250%09red/bta:510814%09red/bta:782481%09red/bta:508541%09red/bta:535597%09red/bta:407221%09red
Response to elevated platelet cytosolic Ca2+	Reactome	R-BTA-76005	8	69	0.0944091	0.21713	CDC37L1|ACTN1|IGF1|VEGFC|TGFB2|PCDH7|SPARC|TMX3	http://www.reactome.org/cgi-bin/eventbrowser_st_id?ST_ID=R-BTA-76005
Salivary secretion	KEGG PATHWAY	bta04970	10	93	0.0949643	0.2183	GNAQ|PRKACB|KCNMA1|ATP1B1|GUCY1A2|PRKG1|SLC12A2|ATP2B1|ATP2B2|ATP2B4	http://www.genome.jp/kegg-bin/show_pathway?bta04970/bta:519758%09red/bta:282004%09red/bta:286845%09red/bta:282641%09red/bta:282323%09red/bta:282573%09red/bta:536654%09red/bta:613800%09red/bta:613600%09red/bta:282146%09red
Intra-Golgi and retrograde Golgi-to-ER traffic	Reactome	R-BTA-6811442	9	81	0.0952221	0.218714	SCOC|TMED2|RAB18|TMF1|TMED9|GOLGA1|ARF5|TUBB2A|VPS54	http://www.reactome.org/cgi-bin/eventbrowser_st_id?ST_ID=R-BTA-6811442
p53 pathway feedback loops 2	PANTHER	P04398	4	25	0.0959295	0.219301	AKT3|NRAS|PPM1D|SIAH1	http://www.pantherdb.org/pathway/pathwayDiagram.jsp?catAccession=P04398
PI3K Cascade	Reactome	R-BTA-109704	4	25	0.0959295	0.219301	PDE3B|FGF2|KL|GAB1	http://www.reactome.org/cgi-bin/eventbrowser_st_id?ST_ID=R-BTA-109704
Regulation of PTEN gene transcription	Reactome	R-BTA-8943724	4	25	0.0959295	0.219301	CBX6|RNF2|BMI1|PHC3	http://www.reactome.org/cgi-bin/eventbrowser_st_id?ST_ID=R-BTA-8943724
Regulation of lipolysis in adipocytes	KEGG PATHWAY	bta04923	7	58	0.0979801	0.221128	NPY1R|PDE3B|AKT2|AKT3|PRKG1|PRKACB|GNAI3	http://www.genome.jp/kegg-bin/show_pathway?bta04923/bta:282004%09red/bta:100137872%09red/bta:533323%09red/bta:282323%09red/bta:539521%09red/bta:504813%09red/bta:534923%09red
Fatty acid metabolism	KEGG PATHWAY	bta01212	7	58	0.0979801	0.221128	ACSL3|ACSL6|ACSL4|ELOVL6|ELOVL7|ELOVL4|ELOVL2	http://www.genome.jp/kegg-bin/show_pathway?bta01212/bta:532015%09red/bta:506059%09red/bta:100138312%09red/bta:615756%09red/bta:533333%09red/bta:536628%09red/bta:614096%09red
@@Fatty acid metabolism	Reactome	R-BTA-8978868	8	92	0.260668	0.426806	PRKAB2|ACSL3|ACSL6|PRKAA2|PON2|ELOVL6|SLC25A17|MID1IP1	http://www.reactome.org/cgi-bin/eventbrowser_st_id?ST_ID=R-BTA-8978868
Toll-like Receptor Cascades	Reactome	R-BTA-168898	7	58	0.0979801	0.221128	NKIRAS2|PELI1|CHUK|MAP3K7|UBA52|MAPK10|MAPK9	http://www.reactome.org/cgi-bin/eventbrowser_st_id?ST_ID=R-BTA-168898
Gastrin-CREB signalling pathway via PKC and MAPK	Reactome	R-BTA-881907	2	7	0.099653	0.221128	HBEGF|NRAS	http://www.reactome.org/cgi-bin/eventbrowser_st_id?ST_ID=R-BTA-881907
RIP-mediated NFkB activation via ZBP1	Reactome	R-BTA-1810476	2	7	0.099653	0.221128	NKIRAS2|CHUK	http://www.reactome.org/cgi-bin/eventbrowser_st_id?ST_ID=R-BTA-1810476
IRAK2 mediated activation of TAK1 complex upon TLR7/8 or 9 stimulation	Reactome	R-BTA-975163	2	7	0.099653	0.221128	UBA52|MAP3K7	http://www.reactome.org/cgi-bin/eventbrowser_st_id?ST_ID=R-BTA-975163
Mitotic Telophase/Cytokinesis	Reactome	R-BTA-68884	2	7	0.099653	0.221128	NIPBL|WAPL	http://www.reactome.org/cgi-bin/eventbrowser_st_id?ST_ID=R-BTA-68884
IRAK2 mediated activation of TAK1 complex	Reactome	R-BTA-937042	2	7	0.099653	0.221128	UBA52|MAP3K7	http://www.reactome.org/cgi-bin/eventbrowser_st_id?ST_ID=R-BTA-937042
Ionotropic activity of kainate receptors	Reactome	R-BTA-451306	2	7	0.099653	0.221128	GRIK2|DLG3	http://www.reactome.org/cgi-bin/eventbrowser_st_id?ST_ID=R-BTA-451306
Interleukin-6 signaling	Reactome	R-BTA-1059683	2	7	0.099653	0.221128	IL6R|IL6ST	http://www.reactome.org/cgi-bin/eventbrowser_st_id?ST_ID=R-BTA-1059683
MAPK1 (ERK2) activation	Reactome	R-BTA-112411	2	7	0.099653	0.221128	IL6R|IL6ST	http://www.reactome.org/cgi-bin/eventbrowser_st_id?ST_ID=R-BTA-112411
TGF-beta receptor signaling in EMT (epithelial to mesenchymal transition)	Reactome	R-BTA-2173791	2	7	0.099653	0.221128	RHOA|UBA52	http://www.reactome.org/cgi-bin/eventbrowser_st_id?ST_ID=R-BTA-2173791
Synthesis of pyrophosphates in the cytosol	Reactome	R-BTA-1855167	2	7	0.099653	0.221128	NUDT11|IP6K1	http://www.reactome.org/cgi-bin/eventbrowser_st_id?ST_ID=R-BTA-1855167
Regulation of IFNG signaling	Reactome	R-BTA-877312	2	7	0.099653	0.221128	SUMO1|IFNG	http://www.reactome.org/cgi-bin/eventbrowser_st_id?ST_ID=R-BTA-877312
TRAF6 mediated NF-kB activation	Reactome	R-BTA-933542	2	7	0.099653	0.221128	NKIRAS2|CHUK	http://www.reactome.org/cgi-bin/eventbrowser_st_id?ST_ID=R-BTA-933542
Transport of nucleosides and free purine and pyrimidine bases across the plasma membrane	Reactome	R-BTA-83936	2	7	0.099653	0.221128	SLC28A3|ARL2BP	http://www.reactome.org/cgi-bin/eventbrowser_st_id?ST_ID=R-BTA-83936
Activation of Ca-permeable Kainate Receptor	Reactome	R-BTA-451308	2	7	0.099653	0.221128	GRIK2|DLG3	http://www.reactome.org/cgi-bin/eventbrowser_st_id?ST_ID=R-BTA-451308
Rab regulation of trafficking	Reactome	R-BTA-9007101	7	59	0.104194	0.227932	RAB5B|ALS2|ARF6|RAB18|DENND5B|GDI2|RAB14	http://www.reactome.org/cgi-bin/eventbrowser_st_id?ST_ID=R-BTA-9007101
EPHB-mediated forward signaling	Reactome	R-BTA-3928662	3	16	0.104571	0.227932	RHOA|ARPC1A|WASL	http://www.reactome.org/cgi-bin/eventbrowser_st_id?ST_ID=R-BTA-3928662
The phototransduction cascade	Reactome	R-BTA-2514856	3	16	0.104571	0.227932	METAP1|GNB1|NMT2	http://www.reactome.org/cgi-bin/eventbrowser_st_id?ST_ID=R-BTA-2514856
Calmodulin induced events	Reactome	R-BTA-111933	3	16	0.104571	0.227932	PDE1A|PRKAR1A|PRKACB	http://www.reactome.org/cgi-bin/eventbrowser_st_id?ST_ID=R-BTA-111933
DAG and IP3 signaling	Reactome	R-BTA-1489509	3	16	0.104571	0.227932	PDE1A|PRKAR1A|PRKACB	http://www.reactome.org/cgi-bin/eventbrowser_st_id?ST_ID=R-BTA-1489509
HS-GAG biosynthesis	Reactome	R-BTA-2022928	3	16	0.104571	0.227932	GPC1|HS3ST3B1|HS3ST1	http://www.reactome.org/cgi-bin/eventbrowser_st_id?ST_ID=R-BTA-2022928
CaM pathway	Reactome	R-BTA-111997	3	16	0.104571	0.227932	PDE1A|PRKAR1A|PRKACB	http://www.reactome.org/cgi-bin/eventbrowser_st_id?ST_ID=R-BTA-111997
Histamine H1 receptor mediated signaling pathway	PANTHER	P04385	4	26	0.105647	0.22872	GNB1|GNG2|GNAQ|GNG12	http://www.pantherdb.org/pathway/pathwayDiagram.jsp?catAccession=P04385
Oxidative stress response	PANTHER	P00046	4	26	0.105647	0.22872	MEF2A|MAPK10|DUSP18|STYX	http://www.pantherdb.org/pathway/pathwayDiagram.jsp?catAccession=P00046
IRS-mediated signalling	Reactome	R-BTA-112399	4	26	0.105647	0.22872	PDE3B|FGF2|KL|GAB1	http://www.reactome.org/cgi-bin/eventbrowser_st_id?ST_ID=R-BTA-112399
MAP kinase activation	Reactome	R-BTA-450294	4	26	0.105647	0.22872	UBA52|MAPK9|MAPK10|CHUK	http://www.reactome.org/cgi-bin/eventbrowser_st_id?ST_ID=R-BTA-450294
Interleukin-17 signaling	Reactome	R-BTA-448424	4	26	0.105647	0.22872	UBA52|MAPK9|MAPK10|CHUK	http://www.reactome.org/cgi-bin/eventbrowser_st_id?ST_ID=R-BTA-448424
IRS-related events triggered by IGF1R	Reactome	R-BTA-2428928	4	26	0.105647	0.22872	PDE3B|FGF2|KL|GAB1	http://www.reactome.org/cgi-bin/eventbrowser_st_id?ST_ID=R-BTA-2428928
Spliceosome	KEGG PATHWAY	bta03040	13	133	0.106611	0.230772	SRSF5|HSPA2|SNRNP40|SNRPB2|AQR|SMNDC1|SRSF2|TCERG1|RBMX|SRSF10|PCBP1|SNRPB|THOC1	http://www.genome.jp/kegg-bin/show_pathway?bta03040/bta:509917%09red/bta:767873%09red/bta:100138748%09red/bta:613304%09red/bta:510474%09red/bta:509591%09red/bta:768310%09red/bta:537445%09red/bta:281827%09red/bta:534645%09red/bta:540964%09red/bta:520500%09
p53 pathway	PANTHER	P00059	5	37	0.108769	0.234149	SUMO1|AKT3|PPM1D|CREBBP|SIAH1	http://www.pantherdb.org/pathway/pathwayDiagram.jsp?catAccession=P00059
Aldosterone-regulated sodium reabsorption	KEGG PATHWAY	bta04960	5	37	0.108769	0.234149	NR3C2|MAPK1|IGF1|SGK1|ATP1B1	http://www.genome.jp/kegg-bin/show_pathway?bta04960/bta:519758%09red/bta:537614%09red/bta:327672%09red/bta:281239%09red/bta:515854%09red
TCR signaling	Reactome	R-BTA-202403	5	37	0.108769	0.234149	UBA52|NCK1|CHUK|MALT1|MAP3K7	http://www.reactome.org/cgi-bin/eventbrowser_st_id?ST_ID=R-BTA-202403
Peroxisome	KEGG PATHWAY	bta04146	9	84	0.110936	0.238341	PEX12|ACSL3|GNPAT|ACSL6|ACSL4|HMGCLL1|SLC25A17|ABCD3|ABCD2	http://www.genome.jp/kegg-bin/show_pathway?bta04146/bta:538800%09red/bta:506059%09red/bta:100138312%09red/bta:506007%09red/bta:506631%09red/bta:535508%09red/bta:526059%09red/bta:526436%09red/bta:536628%09red
Alzheimer disease-amyloid secretase pathway	PANTHER	P00003	4	27	0.115789	0.24756	ADAM10|CACNB2|MAPK10|CACNA1D	http://www.pantherdb.org/pathway/pathwayDiagram.jsp?catAccession=P00003
B cell activation	PANTHER	P00010	4	27	0.115789	0.24756	MAP3K2|MAPK10|NRAS|CHUK	http://www.pantherdb.org/pathway/pathwayDiagram.jsp?catAccession=P00010
Transport of vitamins, nucleosides, and related molecules	Reactome	R-BTA-425397	4	27	0.115789	0.24756	SLC28A3|ARL2BP|SLC35B4|SLC33A1	http://www.reactome.org/cgi-bin/eventbrowser_st_id?ST_ID=R-BTA-425397
IGF1R signaling cascade	Reactome	R-BTA-2428924	4	27	0.115789	0.24756	PDE3B|FGF2|KL|GAB1	http://www.reactome.org/cgi-bin/eventbrowser_st_id?ST_ID=R-BTA-2428924
Signaling by Type 1 Insulin-like Growth Factor 1 Receptor (IGF1R)	Reactome	R-BTA-2404192	4	27	0.115789	0.24756	PDE3B|FGF2|KL|GAB1	http://www.reactome.org/cgi-bin/eventbrowser_st_id?ST_ID=R-BTA-2404192
Insulin receptor signalling cascade	Reactome	R-BTA-74751	4	27	0.115789	0.24756	PDE3B|FGF2|KL|GAB1	http://www.reactome.org/cgi-bin/eventbrowser_st_id?ST_ID=R-BTA-74751
Antigen processing and presentation	KEGG PATHWAY	bta04612	9	85	0.116476	0.247633	HSPA2|HSPA4|IFNG|CREB1|PSME3|IFI30|NFYC|CANX|CTSV	http://www.genome.jp/kegg-bin/show_pathway?bta04612/bta:281827%09red/bta:615930%09red/bta:281713%09red/bta:281237%09red/bta:534003%09red/bta:536558%09red/bta:281108%09red/bta:407129%09red/bta:100336105%09red
RHO GTPases Activate Formins	Reactome	R-BTA-5663220	9	85	0.116476	0.247633	SRF|DYNC1I1|DAAM1|DSN1|CENPK|RHOB|RHOA|TUBB2A|TAOK1	http://www.reactome.org/cgi-bin/eventbrowser_st_id?ST_ID=R-BTA-5663220
Endothelin signaling pathway	PANTHER	P00019	5	38	0.11729	0.247633	AKT3|PRKG1|GNAQ|PRKAR1A|PRKACB	http://www.pantherdb.org/pathway/pathwayDiagram.jsp?catAccession=P00019
Fcgamma receptor (FCGR) dependent phagocytosis	Reactome	R-BTA-2029480	5	38	0.11729	0.247633	ABI2|BAIAP2|ARPC1A|WASL|NCK1	http://www.reactome.org/cgi-bin/eventbrowser_st_id?ST_ID=R-BTA-2029480
Negative regulation of FGFR1 signaling	Reactome	R-BTA-5654726	3	17	0.11774	0.247633	UBA52|FGF2|KL	http://www.reactome.org/cgi-bin/eventbrowser_st_id?ST_ID=R-BTA-5654726
Sialic acid metabolism	Reactome	R-BTA-4085001	3	17	0.11774	0.247633	NANP|ST6GAL2|ST8SIA2	http://www.reactome.org/cgi-bin/eventbrowser_st_id?ST_ID=R-BTA-4085001
FRS-mediated FGFR1 signaling	Reactome	R-BTA-5654693	3	17	0.11774	0.247633	NRAS|FGF2|KL	http://www.reactome.org/cgi-bin/eventbrowser_st_id?ST_ID=R-BTA-5654693
Ca-dependent events	Reactome	R-BTA-111996	3	17	0.11774	0.247633	PDE1A|PRKAR1A|PRKACB	http://www.reactome.org/cgi-bin/eventbrowser_st_id?ST_ID=R-BTA-111996
ABC-family proteins mediated transport	Reactome	R-BTA-382556	3	17	0.11774	0.247633	ABCD3|UBA52|ABCA3	http://www.reactome.org/cgi-bin/eventbrowser_st_id?ST_ID=R-BTA-382556
PI-3K cascade:FGFR1	Reactome	R-BTA-5654689	3	17	0.11774	0.247633	KL|FGF2|GAB1	http://www.reactome.org/cgi-bin/eventbrowser_st_id?ST_ID=R-BTA-5654689
Downstream signaling of activated FGFR3	Reactome	R-BTA-5654708	3	17	0.11774	0.247633	NRAS|FGF2|GAB1	http://www.reactome.org/cgi-bin/eventbrowser_st_id?ST_ID=R-BTA-5654708
Riboflavin metabolism	KEGG PATHWAY	bta00740	2	8	0.119723	0.247633	RFK|ENPP3	http://www.genome.jp/kegg-bin/show_pathway?bta00740/bta:514697%09red/bta:529405%09red
Sema4D in semaphorin signaling	Reactome	R-BTA-400685	2	8	0.119723	0.247633	RHOB|RHOA	http://www.reactome.org/cgi-bin/eventbrowser_st_id?ST_ID=R-BTA-400685
Interleukin-12 family signaling	Reactome	R-BTA-447115	2	8	0.119723	0.247633	CANX|IL6ST	http://www.reactome.org/cgi-bin/eventbrowser_st_id?ST_ID=R-BTA-447115
NIK-->noncanonical NF-kB signaling	Reactome	R-BTA-5676590	2	8	0.119723	0.247633	UBA52|CHUK	http://www.reactome.org/cgi-bin/eventbrowser_st_id?ST_ID=R-BTA-5676590
ZBP1(DAI) mediated induction of type I IFNs	Reactome	R-BTA-1606322	2	8	0.119723	0.247633	NKIRAS2|CHUK	http://www.reactome.org/cgi-bin/eventbrowser_st_id?ST_ID=R-BTA-1606322
Transcriptional activity of SMAD2/SMAD3:SMAD4 heterotrimer	Reactome	R-BTA-2173793	2	8	0.119723	0.247633	UBA52|SKIL	http://www.reactome.org/cgi-bin/eventbrowser_st_id?ST_ID=R-BTA-2173793
MAP3K8 (TPL2)-dependent MAPK1/3 activation	Reactome	R-BTA-5684264	2	8	0.119723	0.247633	UBA52|CHUK	http://www.reactome.org/cgi-bin/eventbrowser_st_id?ST_ID=R-BTA-5684264
N-Glycan antennae elongation	Reactome	R-BTA-975577	2	8	0.119723	0.247633	ST8SIA2|B4GALT6	http://www.reactome.org/cgi-bin/eventbrowser_st_id?ST_ID=R-BTA-975577
FGFR3 ligand binding and activation	Reactome	R-BTA-190239	2	8	0.119723	0.247633	FGF2|GALNT3	http://www.reactome.org/cgi-bin/eventbrowser_st_id?ST_ID=R-BTA-190239
Free fatty acids regulate insulin secretion	Reactome	R-BTA-400451	2	8	0.119723	0.247633	ACSL3|GNAQ	http://www.reactome.org/cgi-bin/eventbrowser_st_id?ST_ID=R-BTA-400451
MAPK3 (ERK1) activation	Reactome	R-BTA-110056	2	8	0.119723	0.247633	IL6R|IL6ST	http://www.reactome.org/cgi-bin/eventbrowser_st_id?ST_ID=R-BTA-110056
Downregulation of TGF-beta receptor signaling	Reactome	R-BTA-2173788	2	8	0.119723	0.247633	UBA52|MTMR4	http://www.reactome.org/cgi-bin/eventbrowser_st_id?ST_ID=R-BTA-2173788
FGFR3c ligand binding and activation	Reactome	R-BTA-190372	2	8	0.119723	0.247633	FGF2|GALNT3	http://www.reactome.org/cgi-bin/eventbrowser_st_id?ST_ID=R-BTA-190372
Dectin-1 mediated noncanonical NF-kB signaling	Reactome	R-BTA-5607761	2	8	0.119723	0.247633	UBA52|CHUK	http://www.reactome.org/cgi-bin/eventbrowser_st_id?ST_ID=R-BTA-5607761
SUMOylation of transcription factors	Reactome	R-BTA-3232118	2	8	0.119723	0.247633	SUMO1|TFAP2C	http://www.reactome.org/cgi-bin/eventbrowser_st_id?ST_ID=R-BTA-3232118
Th1 and Th2 cell differentiation	KEGG PATHWAY	bta04658	10	98	0.119862	0.247811	STAT1|PPP3R1|IFNG|RBPJ|CHUK|NOTCH2|MAPK1|MAPK10|MAF|MAPK9	http://www.genome.jp/kegg-bin/show_pathway?bta04658/bta:513730%09red/bta:782481%09red/bta:281237%09red/bta:510814%09red/bta:282321%09red/bta:281073%09red/bta:537631%09red/bta:534125%09red/bta:767928%09red/bta:327672%09red
RNA polymerase II transcribes snRNA genes	Reactome	R-BTA-6807505	6	50	0.122417	0.252538	SP1|RPAP2|RPRD1A|GTF2A1|CCNT2|NABP1	http://www.reactome.org/cgi-bin/eventbrowser_st_id?ST_ID=R-BTA-6807505
Thyroid hormone synthesis	KEGG PATHWAY	bta04918	8	74	0.123721	0.255003	GNAQ|CREB1|ATP1B1|GPX7|PRKACB|GPX8|CANX|ATF2	http://www.genome.jp/kegg-bin/show_pathway?bta04918/bta:519758%09red/bta:281713%09red/bta:407129%09red/bta:282323%09red/bta:509827%09red/bta:536654%09red/bta:523311%09red/bta:511575%09red
Gastric acid secretion	KEGG PATHWAY	bta04971	8	74	0.123721	0.255003	KCNJ2|GNAQ|MYLK4|PRKACB|EZR|ATP1B1|SLC26A7|GNAI3	http://www.genome.jp/kegg-bin/show_pathway?bta04971/bta:281574%09red/bta:519758%09red/bta:617196%09red/bta:281883%09red/bta:282323%09red/bta:518025%09red/bta:539521%09red/bta:536654%09red
Clathrin-mediated endocytosis	Reactome	R-BTA-8856828	7	62	0.124069	0.255349	FZD4|RAB5B|ARPC1A|HBEGF|UBA52|EREG|WASL	http://www.reactome.org/cgi-bin/eventbrowser_st_id?ST_ID=R-BTA-8856828
Cardiac conduction	Reactome	R-BTA-5576891	7	62	0.124069	0.255349	KCNJ2|ATP2A2|CACNB3|CACNB2|CACNA1D|CACNB4|SCN1A	http://www.reactome.org/cgi-bin/eventbrowser_st_id?ST_ID=R-BTA-5576891
Calcium signaling pathway	KEGG PATHWAY	bta04020	18	203	0.125364	0.257976	PDGFRA|GNAQ|ATP2A2|PLCG2|PDE1A|CACNA1D|STIM2|ATP2B1|CACNA1B|MYLK4|HTR2C|PRKACB|SLC8A1|VDAC2|PPP3R1|ATP2B2|ERBB4|ATP2B4	http://www.genome.jp/kegg-bin/show_pathway?bta04020/bta:337925%09red/bta:538909%09red/bta:282410%09red/bta:613800%09red/bta:541299%09red/bta:282120%09red/bta:282146%09red/bta:282641%09red/bta:522419%09red/bta:282321%09red/bta:282323%09red/bta:518025%09red
T cell activation	PANTHER	P00053	5	39	0.126115	0.258359	AKT3|CD28|NRAS|CHUK|NCK1	http://www.pantherdb.org/pathway/pathwayDiagram.jsp?catAccession=P00053
RNA Polymerase II Transcription Elongation	Reactome	R-BTA-75955	5	39	0.126115	0.258359	SUPT16H|AFF4|MLLT3|CCNT2|CDC73	http://www.reactome.org/cgi-bin/eventbrowser_st_id?ST_ID=R-BTA-75955
Formation of RNA Pol II elongation complex	Reactome	R-BTA-112382	5	39	0.126115	0.258359	SUPT16H|AFF4|MLLT3|CCNT2|CDC73	http://www.reactome.org/cgi-bin/eventbrowser_st_id?ST_ID=R-BTA-112382
Metabolism of carbohydrates	Reactome	R-BTA-71387	12	125	0.128244	0.262217	PGM2L1|AGL|PPP1R3C|HS3ST1|GNPDA2|PFKFB2|CHSY1|GPC1|PFKM|HS3ST3B1|G6PC2|SLC25A12	http://www.reactome.org/cgi-bin/eventbrowser_st_id?ST_ID=R-BTA-71387
Amyotrophic lateral sclerosis (ALS)	KEGG PATHWAY	bta05014	6	51	0.130237	0.265791	BCL2L1|TNFRSF1B|PPP3R1|GRIA1|ALS2|APAF1	http://www.genome.jp/kegg-bin/show_pathway?bta05014/bta:338033%09red/bta:535750%09red/bta:537782%09red/bta:282321%09red/bta:529618%09red/bta:282152%09red
N-Glycan biosynthesis	KEGG PATHWAY	bta00510	6	51	0.130237	0.265791	ST6GAL2|DOLPP1|MGAT2|MAN1C1|MGAT4A|STT3B	http://www.genome.jp/kegg-bin/show_pathway?bta00510/bta:282276%09red/bta:504908%09red/bta:504474%09red/bta:493992%09red/bta:615012%09red/bta:101906103%09red
RNA Polymerase II Pre-transcription Events	Reactome	R-BTA-674695	6	51	0.130237	0.265791	CDC73|SUPT16H|AFF4|MLLT3|GTF2A1|CCNT2	http://www.reactome.org/cgi-bin/eventbrowser_st_id?ST_ID=R-BTA-674695
Ionotropic glutamate receptor pathway	PANTHER	P00037	3	18	0.131486	0.266374	SNAP25|SLC17A6|GRIK2	http://www.pantherdb.org/pathway/pathwayDiagram.jsp?catAccession=P00037
Fatty acid biosynthesis	KEGG PATHWAY	bta00061	3	18	0.131486	0.266374	ACSL3|ACSL6|ACSL4	http://www.genome.jp/kegg-bin/show_pathway?bta00061/bta:100138312%09red/bta:506059%09red/bta:536628%09red
Thiamine metabolism	KEGG PATHWAY	bta00730	3	18	0.131486	0.266374	TPK1|AK7|AK4	http://www.genome.jp/kegg-bin/show_pathway?bta00730/bta:788066%09red/bta:511269%09red/bta:517063%09red
Energy dependent regulation of mTOR by LKB1-AMPK	Reactome	R-BTA-380972	3	18	0.131486	0.266374	PRKAB2|PRKAA2|PPM1A	http://www.reactome.org/cgi-bin/eventbrowser_st_id?ST_ID=R-BTA-380972
G beta:gamma signalling through PLC beta	Reactome	R-BTA-418217	3	18	0.131486	0.266374	GNB1|GNG2|GNG12	http://www.reactome.org/cgi-bin/eventbrowser_st_id?ST_ID=R-BTA-418217
ISG15 antiviral mechanism	Reactome	R-BTA-1169408	3	18	0.131486	0.266374	EIF4E2|PPM1B|ARIH1	http://www.reactome.org/cgi-bin/eventbrowser_st_id?ST_ID=R-BTA-1169408
Presynaptic function of Kainate receptors	Reactome	R-BTA-500657	3	18	0.131486	0.266374	GNB1|GNG2|GNG12	http://www.reactome.org/cgi-bin/eventbrowser_st_id?ST_ID=R-BTA-500657
G beta:gamma signalling through BTK	Reactome	R-BTA-8964315	3	18	0.131486	0.266374	GNB1|GNG2|GNG12	http://www.reactome.org/cgi-bin/eventbrowser_st_id?ST_ID=R-BTA-8964315
G beta:gamma signalling through CDC42	Reactome	R-BTA-8964616	3	18	0.131486	0.266374	GNB1|GNG2|GNG12	http://www.reactome.org/cgi-bin/eventbrowser_st_id?ST_ID=R-BTA-8964616
Striated Muscle Contraction	Reactome	R-BTA-390522	3	18	0.131486	0.266374	ACTC1|ACTA1|VIM	http://www.reactome.org/cgi-bin/eventbrowser_st_id?ST_ID=R-BTA-390522
FGFR2 alternative splicing	Reactome	R-BTA-6803529	3	18	0.131486	0.266374	PTBP1|HNRNPH1|ESRP1	http://www.reactome.org/cgi-bin/eventbrowser_st_id?ST_ID=R-BTA-6803529
Th17 cell differentiation	KEGG PATHWAY	bta04659	11	113	0.132372	0.268131	IL6R|STAT3|PPP3R1|STAT1|IFNG|CHUK|RORA|IL6ST|MAPK1|MAPK10|MAPK9	http://www.genome.jp/kegg-bin/show_pathway?bta04659/bta:522155%09red/bta:281237%09red/bta:510814%09red/bta:282321%09red/bta:281073%09red/bta:537631%09red/bta:534125%09red/bta:327672%09red/bta:535597%09red/bta:508541%09red/bta:507359%09red
CDT1 association with the CDC6:ORC:origin complex	Reactome	R-BTA-68827	5	40	0.135235	0.273223	PSMC2|PSMA5|UBA52|CDC6|PSME3	http://www.reactome.org/cgi-bin/eventbrowser_st_id?ST_ID=R-BTA-68827
Biosynthesis of the N-glycan precursor (dolichol lipid-linked oligosaccharide, LLO) and transfer to a nascent protein	Reactome	R-BTA-446193	5	40	0.135235	0.273223	DOLPP1|NANP|FPGT|ST6GAL2|ST8SIA2	http://www.reactome.org/cgi-bin/eventbrowser_st_id?ST_ID=R-BTA-446193
Hippo signaling pathway - multiple species	KEGG PATHWAY	bta04392	4	29	0.137273	0.275137	CSNK1E|LATS1|STK3|TEAD2	http://www.genome.jp/kegg-bin/show_pathway?bta04392/bta:768234%09red/bta:100125315%09red/bta:535935%09red/bta:533815%09red
Fatty acid elongation	KEGG PATHWAY	bta00062	4	29	0.137273	0.275137	ELOVL6|ELOVL7|ELOVL4|ELOVL2	http://www.genome.jp/kegg-bin/show_pathway?bta00062/bta:615756%09red/bta:532015%09red/bta:614096%09red/bta:533333%09red
p53-Dependent G1/S DNA damage checkpoint	Reactome	R-BTA-69580	2	9	0.140672	0.275137	CDKN1B|UBA52	http://www.reactome.org/cgi-bin/eventbrowser_st_id?ST_ID=R-BTA-69580
p53-Dependent G1 DNA Damage Response	Reactome	R-BTA-69563	2	9	0.140672	0.275137	CDKN1B|UBA52	http://www.reactome.org/cgi-bin/eventbrowser_st_id?ST_ID=R-BTA-69563
Antigen activates B Cell Receptor (BCR) leading to generation of second messengers	Reactome	R-BTA-983695	2	9	0.140672	0.275137	DAPP1|NCK1	http://www.reactome.org/cgi-bin/eventbrowser_st_id?ST_ID=R-BTA-983695
TNFR1-induced proapoptotic signaling	Reactome	R-BTA-5357786	2	9	0.140672	0.275137	OTUD7B|TNFAIP3	http://www.reactome.org/cgi-bin/eventbrowser_st_id?ST_ID=R-BTA-5357786
Cell-extracellular matrix interactions	Reactome	R-BTA-446353	2	9	0.140672	0.275137	FERMT2|ACTN1	http://www.reactome.org/cgi-bin/eventbrowser_st_id?ST_ID=R-BTA-446353
Post-translational modification: synthesis of GPI-anchored proteins	Reactome	R-BTA-163125	2	9	0.140672	0.275137	PGAP1|PIGK	http://www.reactome.org/cgi-bin/eventbrowser_st_id?ST_ID=R-BTA-163125
TRAF6-mediated induction of TAK1 complex within TLR4 complex	Reactome	R-BTA-937072	2	9	0.140672	0.275137	UBA52|MAP3K7	http://www.reactome.org/cgi-bin/eventbrowser_st_id?ST_ID=R-BTA-937072
Na+/Cl- dependent neurotransmitter transporters	Reactome	R-BTA-442660	2	9	0.140672	0.275137	SLC6A15|SLC6A14	http://www.reactome.org/cgi-bin/eventbrowser_st_id?ST_ID=R-BTA-442660
Synthesis, secretion, and deacylation of Ghrelin	Reactome	R-BTA-422085	2	9	0.140672	0.275137	IGF1|GCG	http://www.reactome.org/cgi-bin/eventbrowser_st_id?ST_ID=R-BTA-422085
Inflammasomes	Reactome	R-BTA-622312	2	9	0.140672	0.275137	BCL2L1|SUGT1	http://www.reactome.org/cgi-bin/eventbrowser_st_id?ST_ID=R-BTA-622312
EPHA-mediated growth cone collapse	Reactome	R-BTA-3928663	2	9	0.140672	0.275137	RHOA|EFNA4	http://www.reactome.org/cgi-bin/eventbrowser_st_id?ST_ID=R-BTA-3928663
Rheumatoid arthritis	KEGG PATHWAY	bta05323	10	102	0.14213	0.277874	TNFSF11|CD28|IFNG|TGFB2|VEGFA|ATP6V1G1|ATP6V1C2|IL1A|ANGPT1|CTSV	http://www.genome.jp/kegg-bin/show_pathway?bta05323/bta:534069%09red/bta:513836%09red/bta:281572%09red/bta:281050%09red/bta:281237%09red/bta:281250%09red/bta:281108%09red/bta:282140%09red/bta:281641%09red/bta:508327%09red
Pertussis	KEGG PATHWAY	bta05133	8	77	0.143345	0.279744	ITGB1|MAPK1|MAPK10|CFL2|IL1A|RHOA|MAPK9|GNAI3	http://www.genome.jp/kegg-bin/show_pathway?bta05133/bta:281250%09red/bta:539521%09red/bta:539332%09red/bta:537631%09red/bta:534125%09red/bta:327672%09red/bta:338049%09red/bta:281876%09red
HDR through Homologous Recombination (HRR) or Single Strand Annealing (SSA)	Reactome	R-BTA-5693567	5	41	0.144639	0.28184	UBA52|CHEK1|POLK|PPP4R2|TIPIN	http://www.reactome.org/cgi-bin/eventbrowser_st_id?ST_ID=R-BTA-5693567
Fatty acyl-CoA biosynthesis	Reactome	R-BTA-75105	3	19	0.145758	0.282187	ELOVL6|ACSL3|ACSL6	http://www.reactome.org/cgi-bin/eventbrowser_st_id?ST_ID=R-BTA-75105
Synthesis of bile acids and bile salts	Reactome	R-BTA-192105	3	19	0.145758	0.282187	NCOA2|OSBPL3|CH25H	http://www.reactome.org/cgi-bin/eventbrowser_st_id?ST_ID=R-BTA-192105
Signaling by NOTCH	Reactome	R-BTA-157118	3	19	0.145758	0.282187	ADAM10|UBA52|TMED2	http://www.reactome.org/cgi-bin/eventbrowser_st_id?ST_ID=R-BTA-157118
Cardiac muscle contraction	KEGG PATHWAY	bta04260	9	90	0.146369	0.283176	ATP2A2|CACNB3|ACTC1|CACNA1D|CACNB4|CACNB2|SLC8A1|ATP1B1|COX7A2L	http://www.genome.jp/kegg-bin/show_pathway?bta04260/bta:337925%09red/bta:519758%09red/bta:533219%09red/bta:282160%09red/bta:282161%09red/bta:540568%09red/bta:540225%09red/bta:327667%09red/bta:408013%09red
Dopamine receptor mediated signaling pathway	PANTHER	P05912	4	30	0.148573	0.285676	SNAP25|GNB1|GNAI3|PRKACB	http://www.pantherdb.org/pathway/pathwayDiagram.jsp?catAccession=P05912
Biosynthesis of unsaturated fatty acids	KEGG PATHWAY	bta01040	4	30	0.148573	0.285676	ELOVL6|ELOVL7|ELOVL4|ELOVL2	http://www.genome.jp/kegg-bin/show_pathway?bta01040/bta:615756%09red/bta:532015%09red/bta:614096%09red/bta:533333%09red
Death Receptor Signalling	Reactome	R-BTA-73887	7	66	0.153309	0.29418	OTUD7B|CHUK|TNFAIP3|MAP3K7|UBA52|RHOA|ARHGEF26	http://www.reactome.org/cgi-bin/eventbrowser_st_id?ST_ID=R-BTA-73887
Homology Directed Repair	Reactome	R-BTA-5693538	5	42	0.154314	0.295613	UBA52|CHEK1|POLK|PPP4R2|TIPIN	http://www.reactome.org/cgi-bin/eventbrowser_st_id?ST_ID=R-BTA-5693538
S Phase	Reactome	R-BTA-69242	6	54	0.155064	0.29674	GINS2|GINS1|CDKN1B|UBA52|WAPL|CDC6	http://www.reactome.org/cgi-bin/eventbrowser_st_id?ST_ID=R-BTA-69242
SLC-mediated transmembrane transport	Reactome	R-BTA-425407	12	131	0.159415	0.302411	SLC7A8|SLC38A2|SLC28A3|SLC17A6|SLC33A1|SLC12A5|SLC35B4|SLC26A7|SLC30A5|ARL2BP|SLC6A15|SLC6A14	http://www.reactome.org/cgi-bin/eventbrowser_st_id?ST_ID=R-BTA-425407
G alpha (i) signalling events	Reactome	R-BTA-418594	17	198	0.159886	0.302411	RGS17|CXCL2|METAP1|PDE1A|NPY1R|GNB1|GNG12|GPC1|GNG2|PRKAR1A|NMT2|PRKACB|HTR1E|PDE4B|GNAI3|GPR37|RGS1	http://www.reactome.org/cgi-bin/eventbrowser_st_id?ST_ID=R-BTA-418594
mRNA Splicing - Major Pathway	Reactome	R-BTA-72163	11	118	0.160091	0.302411	SRSF5|SNRPB2|ELAVL1|SRSF2|RBMX|PPIL3|HNRNPH1|PCBP1|PTBP1|CPSF2|WBP4	http://www.reactome.org/cgi-bin/eventbrowser_st_id?ST_ID=R-BTA-72163
Cilium Assembly	Reactome	R-BTA-5617833	10	105	0.160139	0.302411	CLUAP1|TMEM67|TTC30B|PKD2|SMO|CEP76|ACTR1A|RPGRIP1L|TUBB2A|CEP97	http://www.reactome.org/cgi-bin/eventbrowser_st_id?ST_ID=R-BTA-5617833
TNFR2 non-canonical NF-kB pathway	Reactome	R-BTA-5668541	4	31	0.160216	0.302411	TNFSF11|TNFRSF1B|UBA52|CHUK	http://www.reactome.org/cgi-bin/eventbrowser_st_id?ST_ID=R-BTA-5668541
p38 MAPK pathway	PANTHER	P05918	3	20	0.160506	0.302411	MEF2A|SRF|MAP3K7	http://www.pantherdb.org/pathway/pathwayDiagram.jsp?catAccession=P05918
Downstream signaling of activated FGFR2	Reactome	R-BTA-5654696	3	20	0.160506	0.302411	NRAS|FGF2|GAB1	http://www.reactome.org/cgi-bin/eventbrowser_st_id?ST_ID=R-BTA-5654696
Downstream signaling of activated FGFR4	Reactome	R-BTA-5654716	3	20	0.160506	0.302411	NRAS|FGF2|GAB1	http://www.reactome.org/cgi-bin/eventbrowser_st_id?ST_ID=R-BTA-5654716
Activation of the TFAP2 (AP-2) family of transcription factors	Reactome	R-BTA-8866907	2	10	0.162319	0.302411	TFAP2C|CREBBP	http://www.reactome.org/cgi-bin/eventbrowser_st_id?ST_ID=R-BTA-8866907
Butyrate Response Factor 1 (BRF1) binds and destabilizes mRNA	Reactome	R-BTA-450385	2	10	0.162319	0.302411	EXOSC8|ZFP36L1	http://www.reactome.org/cgi-bin/eventbrowser_st_id?ST_ID=R-BTA-450385
TGF-beta receptor signaling activates SMADs	Reactome	R-BTA-2173789	2	10	0.162319	0.302411	UBA52|MTMR4	http://www.reactome.org/cgi-bin/eventbrowser_st_id?ST_ID=R-BTA-2173789
Activation of Matrix Metalloproteinases	Reactome	R-BTA-1592389	2	10	0.162319	0.302411	MMP16|CTSV	http://www.reactome.org/cgi-bin/eventbrowser_st_id?ST_ID=R-BTA-1592389
Negative regulators of DDX58/IFIH1 signaling	Reactome	R-BTA-936440	2	10	0.162319	0.302411	UBA52|TNFAIP3	http://www.reactome.org/cgi-bin/eventbrowser_st_id?ST_ID=R-BTA-936440
Regulation of PTEN stability and activity	Reactome	R-BTA-8948751	2	10	0.162319	0.302411	UBA52|PREX2	http://www.reactome.org/cgi-bin/eventbrowser_st_id?ST_ID=R-BTA-8948751
NCAM signaling for neurite out-growth	Reactome	R-BTA-375165	2	10	0.162319	0.302411	NRAS|PTPRA	http://www.reactome.org/cgi-bin/eventbrowser_st_id?ST_ID=R-BTA-375165
Disassembly of the destruction complex and recruitment of AXIN to the membrane	Reactome	R-BTA-4641262	2	10	0.162319	0.302411	LRP6|FZD5	http://www.reactome.org/cgi-bin/eventbrowser_st_id?ST_ID=R-BTA-4641262
Cellular response to heat stress	Reactome	R-BTA-3371556	6	55	0.163772	0.304756	HSPA13|SIRT1|HSPH1|HSPA4|NUP210|CREBBP	http://www.reactome.org/cgi-bin/eventbrowser_st_id?ST_ID=R-BTA-3371556
Assembly of the pre-replicative complex	Reactome	R-BTA-68867	5	43	0.164248	0.30524	PSMC2|PSMA5|UBA52|CDC6|PSME3	http://www.reactome.org/cgi-bin/eventbrowser_st_id?ST_ID=R-BTA-68867
Regulation of HSF1-mediated heat shock response	Reactome	R-BTA-3371453	5	43	0.164248	0.30524	HSPA13|SIRT1|NUP210|HSPH1|HSPA4	http://www.reactome.org/cgi-bin/eventbrowser_st_id?ST_ID=R-BTA-3371453
Oocyte meiosis	KEGG PATHWAY	bta04114	11	119	0.16596	0.308172	PPP2R1B|RPS6KA3|PPP3R1|CCNE2|IGF1R|CPEB3|MAPK1|IGF1|PRKACB|PTTG1|YWHAG	http://www.genome.jp/kegg-bin/show_pathway?bta04114/bta:281239%09red/bta:286862%09red/bta:511190%09red/bta:537016%09red/bta:282321%09red/bta:100138150%09red/bta:281848%09red/bta:508043%09red/bta:538436%09red/bta:327672%09red/bta:282323%09red
Heterotrimeric G-protein signaling pathway-rod outer segment phototransduction	PANTHER	P00028	4	32	0.172178	0.318841	GNB1|GNG2|GNG12|PRKACB	http://www.pantherdb.org/pathway/pathwayDiagram.jsp?catAccession=P00028
Starch and sucrose metabolism	KEGG PATHWAY	bta00500	4	32	0.172178	0.318841	PGM2L1|AGL|ENPP3|G6PC2	http://www.genome.jp/kegg-bin/show_pathway?bta00500/bta:517397%09red/bta:515366%09red/bta:505012%09red/bta:529405%09red
Platelet homeostasis	Reactome	R-BTA-418346	3	21	0.175679	0.32257	PDE1A|PDE5A|ATP2A2	http://www.reactome.org/cgi-bin/eventbrowser_st_id?ST_ID=R-BTA-418346
Adrenaline,noradrenaline inhibits insulin secretion	Reactome	R-BTA-400042	3	21	0.175679	0.32257	GNB1|GNG2|GNG12	http://www.reactome.org/cgi-bin/eventbrowser_st_id?ST_ID=R-BTA-400042
Activation of NMDA receptors and postsynaptic events	Reactome	R-BTA-442755	3	21	0.175679	0.32257	DLG3|PRKAR1A|PRKACB	http://www.reactome.org/cgi-bin/eventbrowser_st_id?ST_ID=R-BTA-442755
Signaling by SCF-KIT	Reactome	R-BTA-1433557	3	21	0.175679	0.32257	KITLG|NRAS|CHEK1	http://www.reactome.org/cgi-bin/eventbrowser_st_id?ST_ID=R-BTA-1433557
Endosomal Sorting Complex Required For Transport (ESCRT)	Reactome	R-BTA-917729	3	21	0.175679	0.32257	UBA52|VTA1|UBAP1	http://www.reactome.org/cgi-bin/eventbrowser_st_id?ST_ID=R-BTA-917729
TCF dependent signaling in response to WNT	Reactome	R-BTA-201681	8	82	0.179184	0.328744	LRP6|FZD5|CDC73|ASH2L|SOX17|UBA52|FZD4|CREBBP	http://www.reactome.org/cgi-bin/eventbrowser_st_id?ST_ID=R-BTA-201681
Cell Cycle, Mitotic	Reactome	R-BTA-69278	23	286	0.182008	0.331051	CDKN1B|DSN1|RAB2A|CDC6|DYNC1I1|TUBB2A|CEP76|NIPBL|PSMA5|PTTG1|PSMC2|NUP210|CENPK|PSME3|CNEP1R1|WAPL|TAOK1|GINS2|GINS1|CCND2|UBA52|ACTR1A|TFDP1	http://www.reactome.org/cgi-bin/eventbrowser_st_id?ST_ID=R-BTA-69278
Transcriptional Regulation by TP53	Reactome	R-BTA-3700989	12	135	0.182143	0.331051	HIPK1|PRKAB2|BTG2|SGK1|SUPT16H|CDKN1B|PRKAA2|UBA52|DDIT4|RNF34|CCNT2|ING2	http://www.reactome.org/cgi-bin/eventbrowser_st_id?ST_ID=R-BTA-3700989
Autophagy - other	KEGG PATHWAY	bta04136	4	33	0.184437	0.331051	WIPI2|ATG12|ATG7|ATG5	http://www.genome.jp/kegg-bin/show_pathway?bta04136/bta:787967%09red/bta:512685%09red/bta:532686%09red/bta:767903%09red
Signaling by NTRKs	Reactome	R-BTA-166520	4	33	0.184437	0.331051	RHOA|NTF3|NRAS|BDNF	http://www.reactome.org/cgi-bin/eventbrowser_st_id?ST_ID=R-BTA-166520
Axon guidance mediated by semaphorins	PANTHER	P00007	2	11	0.184502	0.331051	CRMP1|RHOA	http://www.pantherdb.org/pathway/pathwayDiagram.jsp?catAccession=P00007
Synthesis and degradation of ketone bodies	KEGG PATHWAY	bta00072	2	11	0.184502	0.331051	HMGCS2|HMGCLL1	http://www.genome.jp/kegg-bin/show_pathway?bta00072/bta:503684%09red/bta:535508%09red
FGFR1 ligand binding and activation	Reactome	R-BTA-190242	2	11	0.184502	0.331051	FGF2|KL	http://www.reactome.org/cgi-bin/eventbrowser_st_id?ST_ID=R-BTA-190242
Phospholipase C-mediated cascade: FGFR1	Reactome	R-BTA-5654219	2	11	0.184502	0.331051	FGF2|KL	http://www.reactome.org/cgi-bin/eventbrowser_st_id?ST_ID=R-BTA-5654219
CRMPs in Sema3A signaling	Reactome	R-BTA-399956	2	11	0.184502	0.331051	CRMP1|PLXNA2	http://www.reactome.org/cgi-bin/eventbrowser_st_id?ST_ID=R-BTA-399956
SHC-mediated cascade:FGFR3	Reactome	R-BTA-5654704	2	11	0.184502	0.331051	NRAS|FGF2	http://www.reactome.org/cgi-bin/eventbrowser_st_id?ST_ID=R-BTA-5654704
Interleukin-6 family signaling	Reactome	R-BTA-6783589	2	11	0.184502	0.331051	IL6R|IL6ST	http://www.reactome.org/cgi-bin/eventbrowser_st_id?ST_ID=R-BTA-6783589
Translesion synthesis by POLK	Reactome	R-BTA-5655862	2	11	0.184502	0.331051	UBA52|POLK	http://www.reactome.org/cgi-bin/eventbrowser_st_id?ST_ID=R-BTA-5655862
Interferon gamma signaling	Reactome	R-BTA-877300	2	11	0.184502	0.331051	SUMO1|IFNG	http://www.reactome.org/cgi-bin/eventbrowser_st_id?ST_ID=R-BTA-877300
Nucleobase catabolism	Reactome	R-BTA-8956319	2	11	0.184502	0.331051	UPB1|NT5C2	http://www.reactome.org/cgi-bin/eventbrowser_st_id?ST_ID=R-BTA-8956319
mRNA Splicing	Reactome	R-BTA-72172	11	123	0.190454	0.339962	SRSF5|SNRPB2|ELAVL1|SRSF2|RBMX|PPIL3|HNRNPH1|PCBP1|PTBP1|CPSF2|WBP4	http://www.reactome.org/cgi-bin/eventbrowser_st_id?ST_ID=R-BTA-72172
Macroautophagy	Reactome	R-BTA-1632852	6	58	0.191079	0.339962	PRKAB2|WIPI2|UVRAG|PRKAA2|UBA52|RB1CC1	http://www.reactome.org/cgi-bin/eventbrowser_st_id?ST_ID=R-BTA-1632852
Proximal tubule bicarbonate reclamation	KEGG PATHWAY	bta04964	3	22	0.191229	0.339962	SLC4A4|GLS|ATP1B1	http://www.genome.jp/kegg-bin/show_pathway?bta04964/bta:519758%09red/bta:525335%09red/bta:282360%09red
Processing of DNA double-strand break ends	Reactome	R-BTA-5693607	3	22	0.191229	0.339962	CHEK1|PPP4R2|TIPIN	http://www.reactome.org/cgi-bin/eventbrowser_st_id?ST_ID=R-BTA-5693607
mTOR signalling	Reactome	R-BTA-165159	3	22	0.191229	0.339962	PRKAB2|PRKAA2|PPM1A	http://www.reactome.org/cgi-bin/eventbrowser_st_id?ST_ID=R-BTA-165159
Microautophagy	Reactome	R-BTA-9615710	3	22	0.191229	0.339962	UBAP1|PRKAB2|PRKAA2	http://www.reactome.org/cgi-bin/eventbrowser_st_id?ST_ID=R-BTA-9615710
Synthesis of PIPs at the plasma membrane	Reactome	R-BTA-1660499	3	22	0.191229	0.339962	MTM1|PLEKHA8|RAB14	http://www.reactome.org/cgi-bin/eventbrowser_st_id?ST_ID=R-BTA-1660499
Autophagy	Reactome	R-BTA-9612973	7	71	0.193832	0.344287	UBAP1|PRKAB2|WIPI2|UVRAG|PRKAA2|UBA52|RB1CC1	http://www.reactome.org/cgi-bin/eventbrowser_st_id?ST_ID=R-BTA-9612973
Influenza A	KEGG PATHWAY	bta05164	15	178	0.195182	0.346465	NXF1|STAT1|IFNG|CHUK|DNAJC3|RAB11A|MAPK1|AKT2|AKT3|CREBBP|KPNA1|IL1A|BAK1|APAF1|KPNA2	http://www.genome.jp/kegg-bin/show_pathway?bta05164/bta:514090%09red/bta:513592%09red/bta:286770%09red/bta:534708%09red/bta:281237%09red/bta:281250%09red/bta:537782%09red/bta:510814%09red/bta:281073%09red/bta:100137872%09red/bta:539679%09red/bta:534923%09
Proteasome	KEGG PATHWAY	bta03050	5	46	0.195477	0.34651	IFNG|PSMC2|PSME3|PSMC6|PSMA5	http://www.genome.jp/kegg-bin/show_pathway?bta03050/bta:510155%09red/bta:281237%09red/bta:100336105%09red/bta:530186%09red/bta:518637%09red
Anchoring of the basal body to the plasma membrane	Reactome	R-BTA-5620912	5	46	0.195477	0.34651	TMEM67|RPGRIP1L|CEP76|CEP97|ACTR1A	http://www.reactome.org/cgi-bin/eventbrowser_st_id?ST_ID=R-BTA-5620912
Mitotic G1-G1/S phases	Reactome	R-BTA-453279	5	46	0.195477	0.34651	CDKN1B|UBA52|CCND2|CDC6|TFDP1	http://www.reactome.org/cgi-bin/eventbrowser_st_id?ST_ID=R-BTA-453279
SNARE interactions in vesicular transport	KEGG PATHWAY	bta04130	4	34	0.196969	0.348322	SEC22B|STX1B|VAMP7|STX17	http://www.genome.jp/kegg-bin/show_pathway?bta04130/bta:534304%09red/bta:282377%09red/bta:614775%09red/bta:613984%09red
Transport of Mature Transcript to Cytoplasm	Reactome	R-BTA-72202	4	34	0.196969	0.348322	NXF1|NUP210|CPSF2|GLE1	http://www.reactome.org/cgi-bin/eventbrowser_st_id?ST_ID=R-BTA-72202
Malaria	KEGG PATHWAY	bta05144	6	59	0.200546	0.354248	TGFB2|IFNG|THBS2|MET|HGF|GYPA	http://www.genome.jp/kegg-bin/show_pathway?bta05144/bta:617836%09red/bta:280855%09red/bta:534069%09red/bta:281237%09red/bta:282879%09red/bta:338092%09red
Metabolism of RNA	Reactome	R-BTA-8953854	26	334	0.204636	0.358556	ISG20L2|ELAVL1|EXOSC8|PPIL3|HNRNPH1|NIP7|CPSF2|GLE1|SRSF5|PAN2|BMS1|SMG1|SRSF2|DDX52|PCBP1|PTBP1|NUP210|WDR3|NXF1|ZFP36L1|THOC1|SNRPB2|LTV1|RBMX|UBA52|WBP4	http://www.reactome.org/cgi-bin/eventbrowser_st_id?ST_ID=R-BTA-8953854
Alzheimer disease	KEGG PATHWAY	bta05010	15	180	0.20591	0.358556	NDUFA5|GNAQ|PPP3R1|NDUFB6|EIF2AK3|CACNA1D|GSK3B|ADAM10|NDUFS2|LPL|APAF1|MAPK1|SDHD|ATP2A2|COX7A2L	http://www.genome.jp/kegg-bin/show_pathway?bta05010/bta:535820%09red/bta:282132%09red/bta:790875%09red/bta:327672%09red/bta:327665%09red/bta:537782%09red/bta:282321%09red/bta:327714%09red/bta:540568%09red/bta:540225%09red/bta:280843%09red/bta:408013%09red
Adrenaline and noradrenaline biosynthesis	PANTHER	P00001	2	12	0.207077	0.358556	SNAP25|SLC6A15	http://www.pantherdb.org/pathway/pathwayDiagram.jsp?catAccession=P00001
Chaperone Mediated Autophagy	Reactome	R-BTA-9613829	2	12	0.207077	0.358556	PRKAB2|PRKAA2	http://www.reactome.org/cgi-bin/eventbrowser_st_id?ST_ID=R-BTA-9613829
Interferon alpha/beta signaling	Reactome	R-BTA-909733	2	12	0.207077	0.358556	PTPN1|ABCE1	http://www.reactome.org/cgi-bin/eventbrowser_st_id?ST_ID=R-BTA-909733
PKA-mediated phosphorylation of CREB	Reactome	R-BTA-111931	2	12	0.207077	0.358556	PRKAR1A|PRKACB	http://www.reactome.org/cgi-bin/eventbrowser_st_id?ST_ID=R-BTA-111931
MAP2K and MAPK activation	Reactome	R-BTA-5674135	2	12	0.207077	0.358556	NRAS|CNKSR2	http://www.reactome.org/cgi-bin/eventbrowser_st_id?ST_ID=R-BTA-5674135
Myogenesis	Reactome	R-BTA-525793	2	12	0.207077	0.358556	MEF2A|BNIP2	http://www.reactome.org/cgi-bin/eventbrowser_st_id?ST_ID=R-BTA-525793
PKA activation	Reactome	R-BTA-163615	2	12	0.207077	0.358556	PRKAR1A|PRKACB	http://www.reactome.org/cgi-bin/eventbrowser_st_id?ST_ID=R-BTA-163615
Protein export	KEGG PATHWAY	bta03060	3	23	0.207106	0.358556	IMMP2L|SEC62|SEC61A1	http://www.genome.jp/kegg-bin/show_pathway?bta03060/bta:101902373%09red/bta:538938%09red/bta:505064%09red
O-linked glycosylation of mucins	Reactome	R-BTA-913709	3	23	0.207106	0.358556	B4GALT6|GALNT18|GALNT3	http://www.reactome.org/cgi-bin/eventbrowser_st_id?ST_ID=R-BTA-913709
Bile acid and bile salt metabolism	Reactome	R-BTA-194068	3	23	0.207106	0.358556	NCOA2|OSBPL3|CH25H	http://www.reactome.org/cgi-bin/eventbrowser_st_id?ST_ID=R-BTA-194068
Iron uptake and transport	Reactome	R-BTA-917937	4	35	0.209751	0.362379	ATP6V1C2|UBA52|CAND1|ATP6V1G1	http://www.reactome.org/cgi-bin/eventbrowser_st_id?ST_ID=R-BTA-917937
Cocaine addiction	KEGG PATHWAY	bta05030	5	48	0.217348	0.373992	BDNF|ATF2|GNAI3|CREB1|PRKACB	http://www.genome.jp/kegg-bin/show_pathway?bta05030/bta:539521%09red/bta:282323%09red/bta:281713%09red/bta:509827%09red/bta:617701%09red
Epigenetic regulation of gene expression	Reactome	R-BTA-212165	6	61	0.219975	0.377744	SIRT1|MTF2|TDG|ERCC6|DEK|TWISTNB	http://www.reactome.org/cgi-bin/eventbrowser_st_id?ST_ID=R-BTA-212165
PI Metabolism	Reactome	R-BTA-1483255	4	36	0.222759	0.380824	MTM1|MTMR4|PLEKHA8|RAB14	http://www.reactome.org/cgi-bin/eventbrowser_st_id?ST_ID=R-BTA-1483255
De novo purine biosynthesis	PANTHER	P02738	2	13	0.229915	0.386236	ATIC|AK4	http://www.pantherdb.org/pathway/pathwayDiagram.jsp?catAccession=P02738
Hypoxia response via HIF activation	PANTHER	P00030	2	13	0.229915	0.386236	AKT3|CREBBP	http://www.pantherdb.org/pathway/pathwayDiagram.jsp?catAccession=P00030
FRS-mediated FGFR3 signaling	Reactome	R-BTA-5654706	2	13	0.229915	0.386236	NRAS|FGF2	http://www.reactome.org/cgi-bin/eventbrowser_st_id?ST_ID=R-BTA-5654706
SCF(Skp2)-mediated degradation of p27/p21	Reactome	R-BTA-187577	2	13	0.229915	0.386236	CDKN1B|UBA52	http://www.reactome.org/cgi-bin/eventbrowser_st_id?ST_ID=R-BTA-187577
Negative regulation of FGFR3 signaling	Reactome	R-BTA-5654732	2	13	0.229915	0.386236	UBA52|FGF2	http://www.reactome.org/cgi-bin/eventbrowser_st_id?ST_ID=R-BTA-5654732
Interleukin-7 signaling	Reactome	R-BTA-1266695	2	13	0.229915	0.386236	IL7R|BRWD1	http://www.reactome.org/cgi-bin/eventbrowser_st_id?ST_ID=R-BTA-1266695
Signaling by NOTCH3	Reactome	R-BTA-9012852	2	13	0.229915	0.386236	ADAM10|UBA52	http://www.reactome.org/cgi-bin/eventbrowser_st_id?ST_ID=R-BTA-9012852
Oxygen-dependent proline hydroxylation of Hypoxia-inducible Factor Alpha	Reactome	R-BTA-1234176	2	13	0.229915	0.386236	HIF3A|UBA52	http://www.reactome.org/cgi-bin/eventbrowser_st_id?ST_ID=R-BTA-1234176
NOTCH3 Activation and Transmission of Signal to the Nucleus	Reactome	R-BTA-9013507	2	13	0.229915	0.386236	ADAM10|UBA52	http://www.reactome.org/cgi-bin/eventbrowser_st_id?ST_ID=R-BTA-9013507
Post NMDA receptor activation events	Reactome	R-BTA-438064	2	13	0.229915	0.386236	PRKAR1A|PRKACB	http://www.reactome.org/cgi-bin/eventbrowser_st_id?ST_ID=R-BTA-438064
PI-3K cascade:FGFR3	Reactome	R-BTA-5654710	2	13	0.229915	0.386236	FGF2|GAB1	http://www.reactome.org/cgi-bin/eventbrowser_st_id?ST_ID=R-BTA-5654710
NF-kappa B signaling pathway	KEGG PATHWAY	bta04064	9	102	0.231411	0.388607	BCL2L1|TNFSF11|BIRC3|CHUK|TNFAIP3|MAP3K7|PLCG2|EDAR|MALT1	http://www.genome.jp/kegg-bin/show_pathway?bta04064/bta:100337091%09red/bta:513836%09red/bta:613947%09red/bta:281073%09red/bta:504994%09red/bta:508105%09red/bta:529146%09red/bta:514386%09red/bta:282152%09red
Inflammatory mediator regulation of TRP channels	KEGG PATHWAY	bta04750	9	103	0.239212	0.400404	IGF1|GNAQ|PRKCE|PLCG2|MAPK10|HTR2C|PRKACB|MAPK9|TRPV3	http://www.genome.jp/kegg-bin/show_pathway?bta04750/bta:100337091%09red/bta:538909%09red/bta:281239%09red/bta:507041%09red/bta:282323%09red/bta:537631%09red/bta:534125%09red/bta:536654%09red/bta:523538%09red
Transcription regulation by bZIP transcription factor	PANTHER	P00055	3	25	0.239657	0.400404	PRKAR1A|CREBBP|GTF2A1	http://www.pantherdb.org/pathway/pathwayDiagram.jsp?catAccession=P00055
TP53 Regulates Metabolic Genes	Reactome	R-BTA-5628897	3	25	0.239657	0.400404	DDIT4|PRKAB2|PRKAA2	http://www.reactome.org/cgi-bin/eventbrowser_st_id?ST_ID=R-BTA-5628897
Transport of Mature mRNAs Derived from Intronless Transcripts	Reactome	R-BTA-159234	3	25	0.239657	0.400404	NUP210|CPSF2|NXF1	http://www.reactome.org/cgi-bin/eventbrowser_st_id?ST_ID=R-BTA-159234
Transport of Mature mRNA Derived from an Intronless Transcript	Reactome	R-BTA-159231	3	25	0.239657	0.400404	NUP210|CPSF2|NXF1	http://www.reactome.org/cgi-bin/eventbrowser_st_id?ST_ID=R-BTA-159231
Amino sugar and nucleotide sugar metabolism	KEGG PATHWAY	bta00520	5	50	0.239929	0.400716	GNPDA2|NANP|CYB5R4|UAP1L1|FPGT	http://www.genome.jp/kegg-bin/show_pathway?bta00520/bta:533608%09red/bta:100299558%09red/bta:516539%09red/bta:100138313%09red/bta:508383%09red
Estrogen-dependent gene expression	Reactome	R-BTA-9018519	6	64	0.250207	0.415635	NCOA2|SP1|CBFB|MED1|GTF2A1|CREBBP	http://www.reactome.org/cgi-bin/eventbrowser_st_id?ST_ID=R-BTA-9018519
Ion channel transport	Reactome	R-BTA-983712	8	91	0.252036	0.415635	ATP2A2|SGK1|ATP8A2|WNK3|UBA52|ATP6V1G1|ATP6V1C2|ATP7A	http://www.reactome.org/cgi-bin/eventbrowser_st_id?ST_ID=R-BTA-983712
Insulin/IGF pathway-protein kinase B signaling cascade	PANTHER	P00033	2	14	0.252901	0.415635	FOXO3|IGF1	http://www.pantherdb.org/pathway/pathwayDiagram.jsp?catAccession=P00033
Axon guidance mediated by netrin	PANTHER	P00009	2	14	0.252901	0.415635	NTN4|RHOU	http://www.pantherdb.org/pathway/pathwayDiagram.jsp?catAccession=P00009
Endogenous cannabinoid signaling	PANTHER	P05730	2	14	0.252901	0.415635	GNB1|GNAI3	http://www.pantherdb.org/pathway/pathwayDiagram.jsp?catAccession=P05730
Nicotine pharmacodynamics pathway	PANTHER	P06587	2	14	0.252901	0.415635	GNB1|GNG2	http://www.pantherdb.org/pathway/pathwayDiagram.jsp?catAccession=P06587
TNFs bind their physiological receptors	Reactome	R-BTA-5669034	2	14	0.252901	0.415635	TNFSF11|TNFRSF1B	http://www.reactome.org/cgi-bin/eventbrowser_st_id?ST_ID=R-BTA-5669034
Lysosome Vesicle Biogenesis	Reactome	R-BTA-432720	2	14	0.252901	0.415635	CLVS2|AP1S3	http://www.reactome.org/cgi-bin/eventbrowser_st_id?ST_ID=R-BTA-432720
MAPK targets/ Nuclear events mediated by MAP kinases	Reactome	R-BTA-450282	2	14	0.252901	0.415635	MAPK9|MAPK10	http://www.reactome.org/cgi-bin/eventbrowser_st_id?ST_ID=R-BTA-450282
SHC-mediated cascade:FGFR2	Reactome	R-BTA-5654699	2	14	0.252901	0.415635	NRAS|FGF2	http://www.reactome.org/cgi-bin/eventbrowser_st_id?ST_ID=R-BTA-5654699
RAF-independent MAPK1/3 activation	Reactome	R-BTA-112409	2	14	0.252901	0.415635	IL6R|IL6ST	http://www.reactome.org/cgi-bin/eventbrowser_st_id?ST_ID=R-BTA-112409
Inactivation, recovery and regulation of the phototransduction cascade	Reactome	R-BTA-2514859	2	14	0.252901	0.415635	METAP1|NMT2	http://www.reactome.org/cgi-bin/eventbrowser_st_id?ST_ID=R-BTA-2514859
SHC-mediated cascade:FGFR4	Reactome	R-BTA-5654719	2	14	0.252901	0.415635	NRAS|FGF2	http://www.reactome.org/cgi-bin/eventbrowser_st_id?ST_ID=R-BTA-5654719
Cyclin E associated events during G1/S transition	Reactome	R-BTA-69202	2	14	0.252901	0.415635	CDKN1B|UBA52	http://www.reactome.org/cgi-bin/eventbrowser_st_id?ST_ID=R-BTA-69202
Deactivation of the beta-catenin transactivating complex	Reactome	R-BTA-3769402	2	14	0.252901	0.415635	UBA52|SOX17	http://www.reactome.org/cgi-bin/eventbrowser_st_id?ST_ID=R-BTA-3769402
Synaptic vesicle cycle	KEGG PATHWAY	bta04721	7	78	0.256626	0.420726	SNAP25|STX1B|SLC17A6|UNC13C|ATP6V1G1|ATP6V1C2|CACNA1B	http://www.genome.jp/kegg-bin/show_pathway?bta04721/bta:100125225%09red/bta:508327%09red/bta:282410%09red/bta:540853%09red/bta:281641%09red/bta:282377%09red/bta:100337128%09red
Taste transduction	KEGG PATHWAY	bta04742	7	79	0.266056	0.434367	PDE1A|SCN9A|SCN2A|PRKACB|HTR1E|GABRA1|SCN3A	http://www.genome.jp/kegg-bin/show_pathway?bta04742/bta:534223%09red/bta:780973%09red/bta:533065%09red/bta:281969%09red/bta:539718%09red/bta:282323%09red/bta:616356%09red
G alpha (q) signalling events	Reactome	R-BTA-416476	11	135	0.272408	0.444115	RGS17|GNAQ|GCG|GNB1|NRAS|GNG12|HBEGF|GNG2|RGS1|F2RL2|GNRHR	http://www.reactome.org/cgi-bin/eventbrowser_st_id?ST_ID=R-BTA-416476
Heparan sulfate/heparin (HS-GAG) metabolism	Reactome	R-BTA-1638091	3	27	0.272974	0.444115	GPC1|HS3ST3B1|HS3ST1	http://www.reactome.org/cgi-bin/eventbrowser_st_id?ST_ID=R-BTA-1638091
Interferon-gamma signaling pathway	PANTHER	P00035	2	15	0.275934	0.444115	IFNG|MAPK10	http://www.pantherdb.org/pathway/pathwayDiagram.jsp?catAccession=P00035
Activation of BH3-only proteins	Reactome	R-BTA-114452	2	15	0.275934	0.444115	BMF|PPP3R1	http://www.reactome.org/cgi-bin/eventbrowser_st_id?ST_ID=R-BTA-114452
Interconversion of nucleotide di- and triphosphates	Reactome	R-BTA-499943	2	15	0.275934	0.444115	CMPK1|AK4	http://www.reactome.org/cgi-bin/eventbrowser_st_id?ST_ID=R-BTA-499943
Cholesterol biosynthesis	Reactome	R-BTA-191273	2	15	0.275934	0.444115	IDI1|HMGCR	http://www.reactome.org/cgi-bin/eventbrowser_st_id?ST_ID=R-BTA-191273
Apoptosis signaling pathway	PANTHER	P00006	4	40	0.276583	0.444501	BCL2L1|AKT3|MAPK10|CHUK	http://www.pantherdb.org/pathway/pathwayDiagram.jsp?catAccession=P00006
Synthesis of DNA	Reactome	R-BTA-69239	4	40	0.276583	0.444501	GINS2|UBA52|GINS1|CDC6	http://www.reactome.org/cgi-bin/eventbrowser_st_id?ST_ID=R-BTA-69239
mRNA 3'-end processing	Reactome	R-BTA-72187	4	40	0.276583	0.444501	SRSF5|THOC1|CPSF2|SRSF2	http://www.reactome.org/cgi-bin/eventbrowser_st_id?ST_ID=R-BTA-72187
Separation of Sister Chromatids	Reactome	R-BTA-2467813	8	94	0.278188	0.446825	CENPK|DYNC1I1|WAPL|DSN1|UBA52|PTTG1|TUBB2A|TAOK1	http://www.reactome.org/cgi-bin/eventbrowser_st_id?ST_ID=R-BTA-2467813
Chromatin organization	Reactome	R-BTA-4839726	7	81	0.285186	0.457336	NCOA2|ASH1L|ASH2L|PRMT6|PAX3|BRWD1|SETDB2	http://www.reactome.org/cgi-bin/eventbrowser_st_id?ST_ID=R-BTA-4839726
Chromatin modifying enzymes	Reactome	R-BTA-3247509	7	81	0.285186	0.457336	NCOA2|ASH1L|ASH2L|PRMT6|PAX3|BRWD1|SETDB2	http://www.reactome.org/cgi-bin/eventbrowser_st_id?ST_ID=R-BTA-3247509
MHC class II antigen presentation	Reactome	R-BTA-2132295	3	28	0.289815	0.463493	CTSV|CANX|AP1S3	http://www.reactome.org/cgi-bin/eventbrowser_st_id?ST_ID=R-BTA-2132295
Transport of Mature mRNA derived from an Intron-Containing Transcript	Reactome	R-BTA-159236	3	28	0.289815	0.463493	NUP210|NXF1|GLE1	http://www.reactome.org/cgi-bin/eventbrowser_st_id?ST_ID=R-BTA-159236
Deubiquitination	Reactome	R-BTA-5688426	12	152	0.293081	0.465055	OTUD7B|MAP3K7|TADA2B|SMAD1|TNFAIP3|PSME3|UBA52|PSMA5|VDAC2|PSMC2|RHOA|USP37	http://www.reactome.org/cgi-bin/eventbrowser_st_id?ST_ID=R-BTA-5688426
Regulation of mitotic cell cycle	Reactome	R-BTA-453276	5	55	0.298733	0.465055	PTTG1|PSMC2|PSMA5|UBA52|PSME3	http://www.reactome.org/cgi-bin/eventbrowser_st_id?ST_ID=R-BTA-453276
APC/C-mediated degradation of cell cycle proteins	Reactome	R-BTA-174143	5	55	0.298733	0.465055	PTTG1|PSMC2|PSMA5|UBA52|PSME3	http://www.reactome.org/cgi-bin/eventbrowser_st_id?ST_ID=R-BTA-174143
Insulin/IGF pathway-mitogen activated protein kinase kinase/MAP kinase cascade	PANTHER	P00032	2	16	0.298922	0.465055	IGF1|RPS6KB1	http://www.pantherdb.org/pathway/pathwayDiagram.jsp?catAccession=P00032
Glycosphingolipid biosynthesis - ganglio series	KEGG PATHWAY	bta00604	2	16	0.298922	0.465055	ST6GALNAC3|SLC33A1	http://www.genome.jp/kegg-bin/show_pathway?bta00604/bta:782689%09red/bta:517797%09red
FRS-mediated FGFR4 signaling	Reactome	R-BTA-5654712	2	16	0.298922	0.465055	NRAS|FGF2	http://www.reactome.org/cgi-bin/eventbrowser_st_id?ST_ID=R-BTA-5654712
Negative regulation of FGFR4 signaling	Reactome	R-BTA-5654733	2	16	0.298922	0.465055	UBA52|FGF2	http://www.reactome.org/cgi-bin/eventbrowser_st_id?ST_ID=R-BTA-5654733
Cyclin A:Cdk2-associated events at S phase entry	Reactome	R-BTA-69656	2	16	0.298922	0.465055	CDKN1B|UBA52	http://www.reactome.org/cgi-bin/eventbrowser_st_id?ST_ID=R-BTA-69656
Gap-filling DNA repair synthesis and ligation in GG-NER	Reactome	R-BTA-5696397	2	16	0.298922	0.465055	UBA52|POLK	http://www.reactome.org/cgi-bin/eventbrowser_st_id?ST_ID=R-BTA-5696397
Miscellaneous transport and binding events	Reactome	R-BTA-5223345	2	16	0.298922	0.465055	LRRC8D|ADD3	http://www.reactome.org/cgi-bin/eventbrowser_st_id?ST_ID=R-BTA-5223345
Negative regulation of FGFR2 signaling	Reactome	R-BTA-5654727	2	16	0.298922	0.465055	UBA52|FGF2	http://www.reactome.org/cgi-bin/eventbrowser_st_id?ST_ID=R-BTA-5654727
PI-3K cascade:FGFR4	Reactome	R-BTA-5654720	2	16	0.298922	0.465055	FGF2|GAB1	http://www.reactome.org/cgi-bin/eventbrowser_st_id?ST_ID=R-BTA-5654720
FRS-mediated FGFR2 signaling	Reactome	R-BTA-5654700	2	16	0.298922	0.465055	NRAS|FGF2	http://www.reactome.org/cgi-bin/eventbrowser_st_id?ST_ID=R-BTA-5654700
PI-3K cascade:FGFR2	Reactome	R-BTA-5654695	2	16	0.298922	0.465055	FGF2|GAB1	http://www.reactome.org/cgi-bin/eventbrowser_st_id?ST_ID=R-BTA-5654695
APC/C:Cdc20 mediated degradation of Securin	Reactome	R-BTA-174154	2	16	0.298922	0.465055	PTTG1|UBA52	http://www.reactome.org/cgi-bin/eventbrowser_st_id?ST_ID=R-BTA-174154
M Phase	Reactome	R-BTA-68886	14	182	0.302595	0.465055	DYNC1I1|CENPK|WAPL|NUP210|DSN1|UBA52|NIPBL|RAB2A|CEP76|CNEP1R1|ACTR1A|PTTG1|TUBB2A|TAOK1	http://www.reactome.org/cgi-bin/eventbrowser_st_id?ST_ID=R-BTA-68886
Organelle biogenesis and maintenance	Reactome	R-BTA-1852241	10	125	0.30344	0.465055	CLUAP1|TMEM67|TTC30B|PKD2|SMO|CEP76|ACTR1A|RPGRIP1L|TUBB2A|CEP97	http://www.reactome.org/cgi-bin/eventbrowser_st_id?ST_ID=R-BTA-1852241
Fatty acid degradation	KEGG PATHWAY	bta00071	4	42	0.304253	0.465055	ACSL3|ACSL6|ACSL4|ADH5	http://www.genome.jp/kegg-bin/show_pathway?bta00071/bta:100138312%09red/bta:506059%09red/bta:536628%09red/bta:505515%09red
Bile secretion	KEGG PATHWAY	bta04976	7	83	0.304629	0.465055	AQP4|ABCG5|ATP1B1|SLC4A4|HMGCR|PRKACB|SULT2A1	http://www.genome.jp/kegg-bin/show_pathway?bta04976/bta:519758%09red/bta:282360%09red/bta:533560%09red/bta:281008%09red/bta:282323%09red/bta:515536%09red/bta:407159%09red
Mitotic Anaphase	Reactome	R-BTA-68882	8	97	0.305022	0.465055	CENPK|DYNC1I1|WAPL|DSN1|UBA52|PTTG1|TUBB2A|TAOK1	http://www.reactome.org/cgi-bin/eventbrowser_st_id?ST_ID=R-BTA-68882
Mitotic Metaphase and Anaphase	Reactome	R-BTA-2555396	8	97	0.305022	0.465055	CENPK|DYNC1I1|WAPL|DSN1|UBA52|PTTG1|TUBB2A|TAOK1	http://www.reactome.org/cgi-bin/eventbrowser_st_id?ST_ID=R-BTA-2555396
RNA polymerase	KEGG PATHWAY	bta03020	3	29	0.306726	0.465055	POLR3E|TWISTNB|POLR3A	http://www.genome.jp/kegg-bin/show_pathway?bta03020/bta:100140537%09red/bta:512375%09red/bta:540308%09red
Glycosphingolipid biosynthesis - lacto and neolacto series	KEGG PATHWAY	bta00601	3	29	0.306726	0.465055	B3GNT5|B3GALT1|FUT9	http://www.genome.jp/kegg-bin/show_pathway?bta00601/bta:282853%09red/bta:539027%09red/bta:767899%09red
Cell junction organization	Reactome	R-BTA-446728	3	29	0.306726	0.465055	FERMT2|ACTN1|CADM1	http://www.reactome.org/cgi-bin/eventbrowser_st_id?ST_ID=R-BTA-446728
Legionellosis	KEGG PATHWAY	bta05134	5	56	0.310784	0.465055	SEC22B|CXCL2|HBS1L|APAF1|HSPA2	http://www.genome.jp/kegg-bin/show_pathway?bta05134/bta:537782%09red/bta:281827%09red/bta:614775%09red/bta:541083%09red/bta:281214%09red
Pyrimidine metabolism	KEGG PATHWAY	bta00240	5	56	0.310784	0.465055	UPB1|CMPK1|NT5C2|ENPP3|DCK	http://www.genome.jp/kegg-bin/show_pathway?bta00240/bta:530642%09red/bta:509965%09red/bta:281951%09red/bta:529405%09red/bta:504557%09red
Golgi-to-ER retrograde transport	Reactome	R-BTA-8856688	5	56	0.310784	0.465055	RAB18|TUBB2A|TMED9|ARF5|TMED2	http://www.reactome.org/cgi-bin/eventbrowser_st_id?ST_ID=R-BTA-8856688
DNA Replication Pre-Initiation	Reactome	R-BTA-69002	5	56	0.310784	0.465055	PSMC2|PSMA5|UBA52|CDC6|PSME3	http://www.reactome.org/cgi-bin/eventbrowser_st_id?ST_ID=R-BTA-69002
N-acetylglucosamine metabolism	PANTHER	P02756	1	5	0.313028	0.465055	GNPDA2	http://www.pantherdb.org/pathway/pathwayDiagram.jsp?catAccession=P02756
Vitamin B1 (thiamin) metabolism	Reactome	R-BTA-196819	1	5	0.313028	0.465055	TPK1	http://www.reactome.org/cgi-bin/eventbrowser_st_id?ST_ID=R-BTA-196819
HuR (ELAVL1) binds and stabilizes mRNA	Reactome	R-BTA-450520	1	5	0.313028	0.465055	ELAVL1	http://www.reactome.org/cgi-bin/eventbrowser_st_id?ST_ID=R-BTA-450520
Degradation of AXIN	Reactome	R-BTA-4641257	1	5	0.313028	0.465055	UBA52	http://www.reactome.org/cgi-bin/eventbrowser_st_id?ST_ID=R-BTA-4641257
Activated NTRK2 signals through FRS2 and FRS3	Reactome	R-BTA-9028731	1	5	0.313028	0.465055	BDNF	http://www.reactome.org/cgi-bin/eventbrowser_st_id?ST_ID=R-BTA-9028731
Unfolded Protein Response (UPR)	Reactome	R-BTA-381119	1	5	0.313028	0.465055	EIF2AK3	http://www.reactome.org/cgi-bin/eventbrowser_st_id?ST_ID=R-BTA-381119
Ketone body metabolism	Reactome	R-BTA-74182	1	5	0.313028	0.465055	HMGCS2	http://www.reactome.org/cgi-bin/eventbrowser_st_id?ST_ID=R-BTA-74182
Apoptotic factor-mediated response	Reactome	R-BTA-111471	1	5	0.313028	0.465055	BAK1	http://www.reactome.org/cgi-bin/eventbrowser_st_id?ST_ID=R-BTA-111471
Regulation of RUNX1 Expression and Activity	Reactome	R-BTA-8934593	1	5	0.313028	0.465055	CBFB	http://www.reactome.org/cgi-bin/eventbrowser_st_id?ST_ID=R-BTA-8934593
Cam-PDE 1 activation	Reactome	R-BTA-111957	1	5	0.313028	0.465055	PDE1A	http://www.reactome.org/cgi-bin/eventbrowser_st_id?ST_ID=R-BTA-111957
COPI-independent Golgi-to-ER retrograde traffic	Reactome	R-BTA-6811436	1	5	0.313028	0.465055	RAB18	http://www.reactome.org/cgi-bin/eventbrowser_st_id?ST_ID=R-BTA-6811436
Downregulation of ERBB2:ERBB3 signaling	Reactome	R-BTA-1358803	1	5	0.313028	0.465055	UBA52	http://www.reactome.org/cgi-bin/eventbrowser_st_id?ST_ID=R-BTA-1358803
PTK6 Regulates RHO GTPases, RAS GTPase and MAP kinases	Reactome	R-BTA-8849471	1	5	0.313028	0.465055	RHOA	http://www.reactome.org/cgi-bin/eventbrowser_st_id?ST_ID=R-BTA-8849471
SUMOylation of SUMOylation proteins	Reactome	R-BTA-4085377	1	5	0.313028	0.465055	SUMO1	http://www.reactome.org/cgi-bin/eventbrowser_st_id?ST_ID=R-BTA-4085377
Sema4D mediated inhibition of cell attachment and migration	Reactome	R-BTA-416550	1	5	0.313028	0.465055	RHOA	http://www.reactome.org/cgi-bin/eventbrowser_st_id?ST_ID=R-BTA-416550
FGFR2b ligand binding and activation	Reactome	R-BTA-190377	1	5	0.313028	0.465055	FGF2	http://www.reactome.org/cgi-bin/eventbrowser_st_id?ST_ID=R-BTA-190377
AUF1 (hnRNP D0) binds and destabilizes mRNA	Reactome	R-BTA-450408	1	5	0.313028	0.465055	UBA52	http://www.reactome.org/cgi-bin/eventbrowser_st_id?ST_ID=R-BTA-450408
Hormone ligand-binding receptors	Reactome	R-BTA-375281	1	5	0.313028	0.465055	GNRHR	http://www.reactome.org/cgi-bin/eventbrowser_st_id?ST_ID=R-BTA-375281
Growth hormone receptor signaling	Reactome	R-BTA-982772	1	5	0.313028	0.465055	PTPN1	http://www.reactome.org/cgi-bin/eventbrowser_st_id?ST_ID=R-BTA-982772
Sensing of DNA Double Strand Breaks	Reactome	R-BTA-5693548	1	5	0.313028	0.465055	KPNA2	http://www.reactome.org/cgi-bin/eventbrowser_st_id?ST_ID=R-BTA-5693548
Synthesis of Dolichyl-phosphate	Reactome	R-BTA-446199	1	5	0.313028	0.465055	DOLPP1	http://www.reactome.org/cgi-bin/eventbrowser_st_id?ST_ID=R-BTA-446199
Alpha-oxidation of phytanate	Reactome	R-BTA-389599	1	5	0.313028	0.465055	SLC25A17	http://www.reactome.org/cgi-bin/eventbrowser_st_id?ST_ID=R-BTA-389599
Depolymerisation of the Nuclear Lamina	Reactome	R-BTA-4419969	1	5	0.313028	0.465055	CNEP1R1	http://www.reactome.org/cgi-bin/eventbrowser_st_id?ST_ID=R-BTA-4419969
Vitamin B5 (pantothenate) metabolism	Reactome	R-BTA-199220	1	5	0.313028	0.465055	PANK3	http://www.reactome.org/cgi-bin/eventbrowser_st_id?ST_ID=R-BTA-199220
SUMOylation of DNA replication proteins	Reactome	R-BTA-4615885	1	5	0.313028	0.465055	SUMO1	http://www.reactome.org/cgi-bin/eventbrowser_st_id?ST_ID=R-BTA-4615885
Stabilization of p53	Reactome	R-BTA-69541	1	5	0.313028	0.465055	UBA52	http://www.reactome.org/cgi-bin/eventbrowser_st_id?ST_ID=R-BTA-69541
N-glycan trimming in the ER and Calnexin/Calreticulin cycle	Reactome	R-BTA-532668	1	5	0.313028	0.465055	UBA52	http://www.reactome.org/cgi-bin/eventbrowser_st_id?ST_ID=R-BTA-532668
Other semaphorin interactions	Reactome	R-BTA-416700	1	5	0.313028	0.465055	PLXNC1	http://www.reactome.org/cgi-bin/eventbrowser_st_id?ST_ID=R-BTA-416700
SUMO is transferred from E1 to E2 (UBE2I, UBC9)	Reactome	R-BTA-3065678	1	5	0.313028	0.465055	SUMO1	http://www.reactome.org/cgi-bin/eventbrowser_st_id?ST_ID=R-BTA-3065678
Acetylcholine regulates insulin secretion	Reactome	R-BTA-399997	1	5	0.313028	0.465055	GNAQ	http://www.reactome.org/cgi-bin/eventbrowser_st_id?ST_ID=R-BTA-399997
Regulation of TP53 Activity through Methylation	Reactome	R-BTA-6804760	1	5	0.313028	0.465055	UBA52	http://www.reactome.org/cgi-bin/eventbrowser_st_id?ST_ID=R-BTA-6804760
Josephin domain DUBs	Reactome	R-BTA-5689877	1	5	0.313028	0.465055	UBA52	http://www.reactome.org/cgi-bin/eventbrowser_st_id?ST_ID=R-BTA-5689877
L1CAM interactions	Reactome	R-BTA-373760	1	5	0.313028	0.465055	GAP43	http://www.reactome.org/cgi-bin/eventbrowser_st_id?ST_ID=R-BTA-373760
Pyrimidine salvage	Reactome	R-BTA-73614	1	5	0.313028	0.465055	DCK	http://www.reactome.org/cgi-bin/eventbrowser_st_id?ST_ID=R-BTA-73614
Phenylalanine metabolism	Reactome	R-BTA-8964208	1	5	0.313028	0.465055	PAH	http://www.reactome.org/cgi-bin/eventbrowser_st_id?ST_ID=R-BTA-8964208
@@Phenylalanine metabolism	KEGG PATHWAY	bta00360	1	23	0.777383	0.807397	PAH	http://www.genome.jp/kegg-bin/show_pathway?bta00360/bta:510583%09red
Eukaryotic Translation Termination	Reactome	R-BTA-72764	1	5	0.313028	0.465055	N6AMT1	http://www.reactome.org/cgi-bin/eventbrowser_st_id?ST_ID=R-BTA-72764
TP53 Regulates Transcription of Genes Involved in G1 Cell Cycle Arrest	Reactome	R-BTA-6804116	1	5	0.313028	0.465055	CDKN1B	http://www.reactome.org/cgi-bin/eventbrowser_st_id?ST_ID=R-BTA-6804116
FGFR1b ligand binding and activation	Reactome	R-BTA-190370	1	5	0.313028	0.465055	FGF2	http://www.reactome.org/cgi-bin/eventbrowser_st_id?ST_ID=R-BTA-190370
p75NTR regulates axonogenesis	Reactome	R-BTA-193697	1	5	0.313028	0.465055	RHOA	http://www.reactome.org/cgi-bin/eventbrowser_st_id?ST_ID=R-BTA-193697
DNA Replication	Reactome	R-BTA-69306	7	84	0.314449	0.466724	GINS2|GINS1|PSME3|UBA52|PSMA5|PSMC2|CDC6	http://www.reactome.org/cgi-bin/eventbrowser_st_id?ST_ID=R-BTA-69306
Cargo recognition for clathrin-mediated endocytosis	Reactome	R-BTA-8856825	4	43	0.318201	0.471647	HBEGF|UBA52|FZD4|EREG	http://www.reactome.org/cgi-bin/eventbrowser_st_id?ST_ID=R-BTA-8856825
Toll receptor signaling pathway	PANTHER	P00054	2	17	0.321786	0.473872	CHUK|MAP3K7	http://www.pantherdb.org/pathway/pathwayDiagram.jsp?catAccession=P00054
Binding and Uptake of Ligands by Scavenger Receptors	Reactome	R-BTA-2173782	2	17	0.321786	0.473872	SPARC|MSR1	http://www.reactome.org/cgi-bin/eventbrowser_st_id?ST_ID=R-BTA-2173782
Glyoxylate metabolism and glycine degradation	Reactome	R-BTA-389661	2	17	0.321786	0.473872	PDHA1|GCSH	http://www.reactome.org/cgi-bin/eventbrowser_st_id?ST_ID=R-BTA-389661
Insulin receptor recycling	Reactome	R-BTA-77387	2	17	0.321786	0.473872	ATP6V1C2|ATP6V1G1	http://www.reactome.org/cgi-bin/eventbrowser_st_id?ST_ID=R-BTA-77387
Metabolism of steroids	Reactome	R-BTA-8957322	5	57	0.322898	0.47526	NCOA2|IDI1|CH25H|HMGCR|OSBPL3	http://www.reactome.org/cgi-bin/eventbrowser_st_id?ST_ID=R-BTA-8957322
Citrate cycle (TCA cycle)	KEGG PATHWAY	bta00020	3	30	0.323672	0.475406	PDHA1|SDHD|DLAT	http://www.genome.jp/kegg-bin/show_pathway?bta00020/bta:407109%09red/bta:512723%09red/bta:281481%09red
SUMOylation of DNA damage response and repair proteins	Reactome	R-BTA-3108214	3	30	0.323672	0.475406	SUMO1|NUP210|TDG	http://www.reactome.org/cgi-bin/eventbrowser_st_id?ST_ID=R-BTA-3108214
Basal transcription factors	KEGG PATHWAY	bta03022	4	44	0.332197	0.487014	GTF2E1|GTF2A1|TAF1|TAF9B	http://www.genome.jp/kegg-bin/show_pathway?bta03022/bta:785612%09red/bta:785085%09red/bta:538983%09red/bta:540525%09red
RNA Polymerase II Transcription Termination	Reactome	R-BTA-73856	4	44	0.332197	0.487014	SRSF5|THOC1|CPSF2|SRSF2	http://www.reactome.org/cgi-bin/eventbrowser_st_id?ST_ID=R-BTA-73856
Galactose metabolism	KEGG PATHWAY	bta00052	3	31	0.340617	0.488845	PFKM|LCT|G6PC2	http://www.genome.jp/kegg-bin/show_pathway?bta00052/bta:514332%09red/bta:505012%09red/bta:506544%09red
Peptide hormone metabolism	Reactome	R-BTA-2980736	3	31	0.340617	0.488845	SLC30A5|IGF1|GCG	http://www.reactome.org/cgi-bin/eventbrowser_st_id?ST_ID=R-BTA-2980736
PKMTs methylate histone lysines	Reactome	R-BTA-3214841	3	31	0.340617	0.488845	ASH1L|SETDB2|ASH2L	http://www.reactome.org/cgi-bin/eventbrowser_st_id?ST_ID=R-BTA-3214841
One carbon pool by folate	KEGG PATHWAY	bta00670	2	18	0.344458	0.488845	ALDH1L2|ATIC	http://www.genome.jp/kegg-bin/show_pathway?bta00670/bta:506343%09red/bta:516864%09red
Gluconeogenesis	Reactome	R-BTA-70263	2	18	0.344458	0.488845	SLC25A12|G6PC2	http://www.reactome.org/cgi-bin/eventbrowser_st_id?ST_ID=R-BTA-70263
ROS and RNS production in phagocytes	Reactome	R-BTA-1222556	2	18	0.344458	0.488845	ATP6V1C2|ATP6V1G1	http://www.reactome.org/cgi-bin/eventbrowser_st_id?ST_ID=R-BTA-1222556
DNA strand elongation	Reactome	R-BTA-69190	2	18	0.344458	0.488845	GINS2|GINS1	http://www.reactome.org/cgi-bin/eventbrowser_st_id?ST_ID=R-BTA-69190
The role of GTSE1 in G2/M progression after G2 checkpoint	Reactome	R-BTA-8852276	2	18	0.344458	0.488845	UBA52|TUBB2A	http://www.reactome.org/cgi-bin/eventbrowser_st_id?ST_ID=R-BTA-8852276
Autodegradation of Cdh1 by Cdh1:APC/C	Reactome	R-BTA-174084	4	45	0.34622	0.488845	PSMC2|PSMA5|UBA52|PSME3	http://www.reactome.org/cgi-bin/eventbrowser_st_id?ST_ID=R-BTA-174084
Visual phototransduction	Reactome	R-BTA-2187338	4	45	0.34622	0.488845	METAP1|GPC1|GNB1|NMT2	http://www.reactome.org/cgi-bin/eventbrowser_st_id?ST_ID=R-BTA-2187338
RIG-I-like receptor signaling pathway	KEGG PATHWAY	bta04622	8	102	0.35084	0.488845	IFNW1|DDX3X|CHUK|MAP3K7|ATG12|MAPK10|ATG5|MAPK9	http://www.genome.jp/kegg-bin/show_pathway?bta04622/bta:532686%09red/bta:510093%09red/bta:281073%09red/bta:529146%09red/bta:537631%09red/bta:534125%09red/bta:281847%09red/bta:767903%09red
5HT3 type receptor mediated signaling pathway	PANTHER	P04375	1	6	0.354704	0.488845	SNAP25	http://www.pantherdb.org/pathway/pathwayDiagram.jsp?catAccession=P04375
Vitamin D metabolism and pathway	PANTHER	P04396	1	6	0.354704	0.488845	FDX1	http://www.pantherdb.org/pathway/pathwayDiagram.jsp?catAccession=P04396
Phenylalanine, tyrosine and tryptophan biosynthesis	KEGG PATHWAY	bta00400	1	6	0.354704	0.488845	PAH	http://www.genome.jp/kegg-bin/show_pathway?bta00400/bta:510583%09red
Regulation of RUNX2 expression and activity	Reactome	R-BTA-8939902	1	6	0.354704	0.488845	UBA52	http://www.reactome.org/cgi-bin/eventbrowser_st_id?ST_ID=R-BTA-8939902
PTK6 Regulates Cell Cycle	Reactome	R-BTA-8849470	1	6	0.354704	0.488845	CDKN1B	http://www.reactome.org/cgi-bin/eventbrowser_st_id?ST_ID=R-BTA-8849470
SUMOylation of immune response proteins	Reactome	R-BTA-4755510	1	6	0.354704	0.488845	SUMO1	http://www.reactome.org/cgi-bin/eventbrowser_st_id?ST_ID=R-BTA-4755510
Calcineurin activates NFAT	Reactome	R-BTA-2025928	1	6	0.354704	0.488845	PPP3R1	http://www.reactome.org/cgi-bin/eventbrowser_st_id?ST_ID=R-BTA-2025928
Glutamate and glutamine metabolism	Reactome	R-BTA-8964539	1	6	0.354704	0.488845	RIMKLB	http://www.reactome.org/cgi-bin/eventbrowser_st_id?ST_ID=R-BTA-8964539
Signaling by NTRK2 (TRKB)	Reactome	R-BTA-9006115	1	6	0.354704	0.488845	BDNF	http://www.reactome.org/cgi-bin/eventbrowser_st_id?ST_ID=R-BTA-9006115
The NLRP3 inflammasome	Reactome	R-BTA-844456	1	6	0.354704	0.488845	SUGT1	http://www.reactome.org/cgi-bin/eventbrowser_st_id?ST_ID=R-BTA-844456
Fatty Acids bound to GPR40 (FFAR1) regulate insulin secretion	Reactome	R-BTA-434316	1	6	0.354704	0.488845	GNAQ	http://www.reactome.org/cgi-bin/eventbrowser_st_id?ST_ID=R-BTA-434316
Signalling to RAS	Reactome	R-BTA-167044	1	6	0.354704	0.488845	NRAS	http://www.reactome.org/cgi-bin/eventbrowser_st_id?ST_ID=R-BTA-167044
Regulation of localization of FOXO transcription factors	Reactome	R-BTA-9614399	1	6	0.354704	0.488845	FOXO3	http://www.reactome.org/cgi-bin/eventbrowser_st_id?ST_ID=R-BTA-9614399
SUMOylation of ubiquitinylation proteins	Reactome	R-BTA-3232142	1	6	0.354704	0.488845	SUMO1	http://www.reactome.org/cgi-bin/eventbrowser_st_id?ST_ID=R-BTA-3232142
Aspartate and asparagine metabolism	Reactome	R-BTA-8963693	1	6	0.354704	0.488845	SLC25A12	http://www.reactome.org/cgi-bin/eventbrowser_st_id?ST_ID=R-BTA-8963693
SMAD2/SMAD3:SMAD4 heterotrimer regulates transcription	Reactome	R-BTA-2173796	1	6	0.354704	0.488845	UBA52	http://www.reactome.org/cgi-bin/eventbrowser_st_id?ST_ID=R-BTA-2173796
RHO GTPases activate PAKs	Reactome	R-BTA-5627123	1	6	0.354704	0.488845	MYH10	http://www.reactome.org/cgi-bin/eventbrowser_st_id?ST_ID=R-BTA-5627123
Purine ribonucleoside monophosphate biosynthesis	Reactome	R-BTA-73817	1	6	0.354704	0.488845	ATIC	http://www.reactome.org/cgi-bin/eventbrowser_st_id?ST_ID=R-BTA-73817
CLEC7A (Dectin-1) induces NFAT activation	Reactome	R-BTA-5607763	1	6	0.354704	0.488845	PPP3R1	http://www.reactome.org/cgi-bin/eventbrowser_st_id?ST_ID=R-BTA-5607763
Ca2+ activated K+ channels	Reactome	R-BTA-1296052	1	6	0.354704	0.488845	KCNMA1	http://www.reactome.org/cgi-bin/eventbrowser_st_id?ST_ID=R-BTA-1296052
Synaptic adhesion-like molecules	Reactome	R-BTA-8849932	1	6	0.354704	0.488845	DLG3	http://www.reactome.org/cgi-bin/eventbrowser_st_id?ST_ID=R-BTA-8849932
PI3K/AKT activation	Reactome	R-BTA-198203	1	6	0.354704	0.488845	RHOA	http://www.reactome.org/cgi-bin/eventbrowser_st_id?ST_ID=R-BTA-198203
Degradation of DVL	Reactome	R-BTA-4641258	1	6	0.354704	0.488845	UBA52	http://www.reactome.org/cgi-bin/eventbrowser_st_id?ST_ID=R-BTA-4641258
RHO GTPases activate KTN1	Reactome	R-BTA-5625970	1	6	0.354704	0.488845	RHOA	http://www.reactome.org/cgi-bin/eventbrowser_st_id?ST_ID=R-BTA-5625970
Purine catabolism	Reactome	R-BTA-74259	1	6	0.354704	0.488845	NT5C2	http://www.reactome.org/cgi-bin/eventbrowser_st_id?ST_ID=R-BTA-74259
Plasma lipoprotein assembly	Reactome	R-BTA-8963898	1	6	0.354704	0.488845	PRKACB	http://www.reactome.org/cgi-bin/eventbrowser_st_id?ST_ID=R-BTA-8963898
Synthesis of 5-eicosatetraenoic acids	Reactome	R-BTA-2142688	1	6	0.354704	0.488845	PON2	http://www.reactome.org/cgi-bin/eventbrowser_st_id?ST_ID=R-BTA-2142688
Passive transport by Aquaporins	Reactome	R-BTA-432047	1	6	0.354704	0.488845	AQP4	http://www.reactome.org/cgi-bin/eventbrowser_st_id?ST_ID=R-BTA-432047
Regulation of innate immune responses to cytosolic DNA	Reactome	R-BTA-3134975	1	6	0.354704	0.488845	UBA52	http://www.reactome.org/cgi-bin/eventbrowser_st_id?ST_ID=R-BTA-3134975
Reactions specific to the complex N-glycan synthesis pathway	Reactome	R-BTA-975578	1	6	0.354704	0.488845	MGAT2	http://www.reactome.org/cgi-bin/eventbrowser_st_id?ST_ID=R-BTA-975578
Phenylalanine and tyrosine metabolism	Reactome	R-BTA-8963691	1	6	0.354704	0.488845	PAH	http://www.reactome.org/cgi-bin/eventbrowser_st_id?ST_ID=R-BTA-8963691
Organic anion transporters	Reactome	R-BTA-428643	1	6	0.354704	0.488845	SLC17A6	http://www.reactome.org/cgi-bin/eventbrowser_st_id?ST_ID=R-BTA-428643
Depyrimidination	Reactome	R-BTA-73928	1	6	0.354704	0.488845	TDG	http://www.reactome.org/cgi-bin/eventbrowser_st_id?ST_ID=R-BTA-73928
Cleavage of the damaged pyrimidine	Reactome	R-BTA-110329	1	6	0.354704	0.488845	TDG	http://www.reactome.org/cgi-bin/eventbrowser_st_id?ST_ID=R-BTA-110329
Ion transport by P-type ATPases	Reactome	R-BTA-936837	3	32	0.357529	0.491345	ATP8A2|ATP7A|ATP2A2	http://www.reactome.org/cgi-bin/eventbrowser_st_id?ST_ID=R-BTA-936837
Switching of origins to a post-replicative state	Reactome	R-BTA-69052	2	19	0.366876	0.500192	UBA52|CDC6	http://www.reactome.org/cgi-bin/eventbrowser_st_id?ST_ID=R-BTA-69052
CDK-mediated phosphorylation and removal of Cdc6	Reactome	R-BTA-69017	2	19	0.366876	0.500192	UBA52|CDC6	http://www.reactome.org/cgi-bin/eventbrowser_st_id?ST_ID=R-BTA-69017
Vascular smooth muscle contraction	KEGG PATHWAY	bta04270	10	133	0.368144	0.501657	GNAQ|CACNA1D|MYLK4|PRKCE|KCNMA1|GUCY1A2|PRKG1|PRKACB|MAPK1|RHOA	http://www.genome.jp/kegg-bin/show_pathway?bta04270/bta:282004%09red/bta:282573%09red/bta:327672%09red/bta:507041%09red/bta:282323%09red/bta:518025%09red/bta:408013%09red/bta:536654%09red/bta:613600%09red/bta:338049%09red
Mineral absorption	KEGG PATHWAY	bta04978	4	47	0.374277	0.508798	SLC8A1|SLC6A19|MT2A|ATP1B1	http://www.genome.jp/kegg-bin/show_pathway?bta04978/bta:337925%09red/bta:519758%09red/bta:100337416%09red/bta:404070%09red
G1/S Transition	Reactome	R-BTA-69206	3	33	0.374379	0.508798	CDKN1B|UBA52|CDC6	http://www.reactome.org/cgi-bin/eventbrowser_st_id?ST_ID=R-BTA-69206
Viral myocarditis	KEGG PATHWAY	bta05416	6	76	0.379191	0.511447	CXADR|LAMA2|CD28|DMD|EIF4G3|DAG1	http://www.genome.jp/kegg-bin/show_pathway?bta05416/bta:100138434%09red/bta:537655%09red/bta:281439%09red/bta:281050%09red/bta:534618%09red/bta:281733%09red
Factors involved in megakaryocyte development and platelet production	Reactome	R-BTA-983231	6	76	0.379191	0.511447	CAPZA2|AKAP1|RBSN|PRKAR1A|PRKACB|TUBB2A	http://www.reactome.org/cgi-bin/eventbrowser_st_id?ST_ID=R-BTA-983231
Parkinson disease	KEGG PATHWAY	bta05012	11	150	0.386558	0.511447	NDUFA5|NDUFB6|GNAI3|NDUFS2|APAF1|UBE2G1|PRKACB|VDAC2|SDHD|GPR37|COX7A2L	http://www.genome.jp/kegg-bin/show_pathway?bta05012/bta:532626%09red/bta:613676%09red/bta:282120%09red/bta:537782%09red/bta:282323%09red/bta:539521%09red/bta:327714%09red/bta:540225%09red/bta:327665%09red/bta:281481%09red/bta:327697%09red
@@Parkinson disease	PANTHER	P00049	4	51	0.429939	0.536853	MAPK10|YWHAG|CASK|PSMA5	http://www.pantherdb.org/pathway/pathwayDiagram.jsp?catAccession=P00049
Transferrin endocytosis and recycling	Reactome	R-BTA-917977	2	20	0.388988	0.511447	ATP6V1C2|ATP6V1G1	http://www.reactome.org/cgi-bin/eventbrowser_st_id?ST_ID=R-BTA-917977
Transport of the SLBP Dependant Mature mRNA	Reactome	R-BTA-159230	2	20	0.388988	0.511447	NUP210|NXF1	http://www.reactome.org/cgi-bin/eventbrowser_st_id?ST_ID=R-BTA-159230
Transport of the SLBP independent Mature mRNA	Reactome	R-BTA-159227	2	20	0.388988	0.511447	NUP210|NXF1	http://www.reactome.org/cgi-bin/eventbrowser_st_id?ST_ID=R-BTA-159227
Plasma lipoprotein assembly, remodeling, and clearance	Reactome	R-BTA-174824	2	20	0.388988	0.511447	LPL|PRKACB	http://www.reactome.org/cgi-bin/eventbrowser_st_id?ST_ID=R-BTA-174824
APC/C:Cdh1 mediated degradation of Cdc20 and other APC/C:Cdh1 targeted proteins in late mitosis/early G1	Reactome	R-BTA-174178	2	20	0.388988	0.511447	PTTG1|UBA52	http://www.reactome.org/cgi-bin/eventbrowser_st_id?ST_ID=R-BTA-174178
Fructose and mannose metabolism	KEGG PATHWAY	bta00051	3	34	0.391139	0.511447	PFKM|FPGT|PFKFB2	http://www.genome.jp/kegg-bin/show_pathway?bta00051/bta:287019%09red/bta:100138313%09red/bta:506544%09red
E3 ubiquitin ligases ubiquitinate target proteins	Reactome	R-BTA-8866654	3	34	0.391139	0.511447	UBA52|PEX12|CDC73	http://www.reactome.org/cgi-bin/eventbrowser_st_id?ST_ID=R-BTA-8866654
5-Hydroxytryptamine degredation	PANTHER	P04372	1	7	0.393853	0.511447	ALDH1L2	http://www.pantherdb.org/pathway/pathwayDiagram.jsp?catAccession=P04372
Vasopressin synthesis	PANTHER	P04395	1	7	0.393853	0.511447	CPE	http://www.pantherdb.org/pathway/pathwayDiagram.jsp?catAccession=P04395
Reduction of cytosolic Ca++ levels	Reactome	R-BTA-418359	1	7	0.393853	0.511447	ATP2A2	http://www.reactome.org/cgi-bin/eventbrowser_st_id?ST_ID=R-BTA-418359
Glycogen breakdown (glycogenolysis)	Reactome	R-BTA-70221	1	7	0.393853	0.511447	AGL	http://www.reactome.org/cgi-bin/eventbrowser_st_id?ST_ID=R-BTA-70221
Serotonin receptors	Reactome	R-BTA-390666	1	7	0.393853	0.511447	HTR1E	http://www.reactome.org/cgi-bin/eventbrowser_st_id?ST_ID=R-BTA-390666
Insulin processing	Reactome	R-BTA-264876	1	7	0.393853	0.511447	SLC30A5	http://www.reactome.org/cgi-bin/eventbrowser_st_id?ST_ID=R-BTA-264876
Sema3A PAK dependent Axon repulsion	Reactome	R-BTA-399954	1	7	0.393853	0.511447	PLXNA2	http://www.reactome.org/cgi-bin/eventbrowser_st_id?ST_ID=R-BTA-399954
Incretin synthesis, secretion, and inactivation	Reactome	R-BTA-400508	1	7	0.393853	0.511447	GCG	http://www.reactome.org/cgi-bin/eventbrowser_st_id?ST_ID=R-BTA-400508
Integrin signaling	Reactome	R-BTA-9006921	1	7	0.393853	0.511447	RAP1B	http://www.reactome.org/cgi-bin/eventbrowser_st_id?ST_ID=R-BTA-9006921
Nucleobase biosynthesis	Reactome	R-BTA-8956320	1	7	0.393853	0.511447	ATIC	http://www.reactome.org/cgi-bin/eventbrowser_st_id?ST_ID=R-BTA-8956320
Regulation of pyruvate dehydrogenase (PDH) complex	Reactome	R-BTA-204174	1	7	0.393853	0.511447	PDHA1	http://www.reactome.org/cgi-bin/eventbrowser_st_id?ST_ID=R-BTA-204174
Platelet Aggregation (Plug Formation)	Reactome	R-BTA-76009	1	7	0.393853	0.511447	RAP1B	http://www.reactome.org/cgi-bin/eventbrowser_st_id?ST_ID=R-BTA-76009
Recycling of bile acids and salts	Reactome	R-BTA-159418	1	7	0.393853	0.511447	NCOA2	http://www.reactome.org/cgi-bin/eventbrowser_st_id?ST_ID=R-BTA-159418
Regulation of KIT signaling	Reactome	R-BTA-1433559	1	7	0.393853	0.511447	KITLG	http://www.reactome.org/cgi-bin/eventbrowser_st_id?ST_ID=R-BTA-1433559
IL-6-type cytokine receptor ligand interactions	Reactome	R-BTA-6788467	1	7	0.393853	0.511447	IL6ST	http://www.reactome.org/cgi-bin/eventbrowser_st_id?ST_ID=R-BTA-6788467
Synthesis, secretion, and inactivation of Glucagon-like Peptide-1 (GLP-1)	Reactome	R-BTA-381771	1	7	0.393853	0.511447	GCG	http://www.reactome.org/cgi-bin/eventbrowser_st_id?ST_ID=R-BTA-381771
FBXL7 down-regulates AURKA during mitotic entry and in early mitosis	Reactome	R-BTA-8854050	1	7	0.393853	0.511447	UBA52	http://www.reactome.org/cgi-bin/eventbrowser_st_id?ST_ID=R-BTA-8854050
Glutamate Neurotransmitter Release Cycle	Reactome	R-BTA-210500	1	7	0.393853	0.511447	SLC38A2	http://www.reactome.org/cgi-bin/eventbrowser_st_id?ST_ID=R-BTA-210500
FGFRL1 modulation of FGFR1 signaling	Reactome	R-BTA-5658623	1	7	0.393853	0.511447	FGF2	http://www.reactome.org/cgi-bin/eventbrowser_st_id?ST_ID=R-BTA-5658623
Methylation	Reactome	R-BTA-156581	1	7	0.393853	0.511447	N6AMT1	http://www.reactome.org/cgi-bin/eventbrowser_st_id?ST_ID=R-BTA-156581
PI5P Regulates TP53 Acetylation	Reactome	R-BTA-6811555	1	7	0.393853	0.511447	ING2	http://www.reactome.org/cgi-bin/eventbrowser_st_id?ST_ID=R-BTA-6811555
Regulation of IFNA signaling	Reactome	R-BTA-912694	1	7	0.393853	0.511447	PTPN1	http://www.reactome.org/cgi-bin/eventbrowser_st_id?ST_ID=R-BTA-912694
Attenuation phase	Reactome	R-BTA-3371568	1	7	0.393853	0.511447	CREBBP	http://www.reactome.org/cgi-bin/eventbrowser_st_id?ST_ID=R-BTA-3371568
Integrin alphaIIb beta3 signaling	Reactome	R-BTA-354192	1	7	0.393853	0.511447	RAP1B	http://www.reactome.org/cgi-bin/eventbrowser_st_id?ST_ID=R-BTA-354192
Phospholipase C-mediated cascade; FGFR3	Reactome	R-BTA-5654227	1	7	0.393853	0.511447	FGF2	http://www.reactome.org/cgi-bin/eventbrowser_st_id?ST_ID=R-BTA-5654227
TRAF6 mediated IRF7 activation in TLR7/8 or 9 signaling	Reactome	R-BTA-975110	1	7	0.393853	0.511447	UBA52	http://www.reactome.org/cgi-bin/eventbrowser_st_id?ST_ID=R-BTA-975110
Creatine metabolism	Reactome	R-BTA-71288	1	7	0.393853	0.511447	GATM	http://www.reactome.org/cgi-bin/eventbrowser_st_id?ST_ID=R-BTA-71288
DNA Double-Strand Break Repair	Reactome	R-BTA-5693532	7	92	0.394422	0.512044	TIPIN|SUMO1|PPP4R2|UBA52|KPNA2|POLK|CHEK1	http://www.reactome.org/cgi-bin/eventbrowser_st_id?ST_ID=R-BTA-5693532
Mitotic Prometaphase	Reactome	R-BTA-68877	8	108	0.40675	0.52732	CENPK|DYNC1I1|WAPL|DSN1|CEP76|ACTR1A|TUBB2A|TAOK1	http://www.reactome.org/cgi-bin/eventbrowser_st_id?ST_ID=R-BTA-68877
Glycolysis / Gluconeogenesis	KEGG PATHWAY	bta00010	5	64	0.408397	0.529114	PFKM|PDHA1|DLAT|ADH5|G6PC2	http://www.genome.jp/kegg-bin/show_pathway?bta00010/bta:407109%09red/bta:505515%09red/bta:512723%09red/bta:505012%09red/bta:506544%09red
Other types of O-glycan biosynthesis	KEGG PATHWAY	bta00514	2	21	0.410748	0.52992	ST6GAL2|GXYLT1	http://www.genome.jp/kegg-bin/show_pathway?bta00514/bta:493992%09red/bta:617596%09red
APC/C:Cdc20 mediated degradation of mitotic proteins	Reactome	R-BTA-176409	2	21	0.410748	0.52992	PTTG1|UBA52	http://www.reactome.org/cgi-bin/eventbrowser_st_id?ST_ID=R-BTA-176409
Activation of APC/C and APC/C:Cdc20 mediated degradation of mitotic proteins	Reactome	R-BTA-176814	2	21	0.410748	0.52992	PTTG1|UBA52	http://www.reactome.org/cgi-bin/eventbrowser_st_id?ST_ID=R-BTA-176814
Chondroitin sulfate/dermatan sulfate metabolism	Reactome	R-BTA-1793185	2	21	0.410748	0.52992	GPC1|CHSY1	http://www.reactome.org/cgi-bin/eventbrowser_st_id?ST_ID=R-BTA-1793185
Resolution of Sister Chromatid Cohesion	Reactome	R-BTA-2500257	6	79	0.412158	0.531593	CENPK|DYNC1I1|WAPL|DSN1|TUBB2A|TAOK1	http://www.reactome.org/cgi-bin/eventbrowser_st_id?ST_ID=R-BTA-2500257
Toll-like receptor signaling pathway	KEGG PATHWAY	bta04620	8	110	0.425422	0.536853	STAT1|CHUK|MAP3K7|AKT2|AKT3|MAPK10|MAPK1|MAPK9	http://www.genome.jp/kegg-bin/show_pathway?bta04620/bta:100137872%09red/bta:510814%09red/bta:281073%09red/bta:529146%09red/bta:537631%09red/bta:534125%09red/bta:534923%09red/bta:327672%09red
COPI-dependent Golgi-to-ER retrograde traffic	Reactome	R-BTA-6811434	4	51	0.429939	0.536853	TUBB2A|TMED9|ARF5|TMED2	http://www.reactome.org/cgi-bin/eventbrowser_st_id?ST_ID=R-BTA-6811434
FAS signaling pathway	PANTHER	P00020	1	8	0.430628	0.536853	MAPK10	http://www.pantherdb.org/pathway/pathwayDiagram.jsp?catAccession=P00020
FGFR1c ligand binding and activation	Reactome	R-BTA-190373	1	8	0.430628	0.536853	FGF2	http://www.reactome.org/cgi-bin/eventbrowser_st_id?ST_ID=R-BTA-190373
Erythropoietin activates Phosphoinositide-3-kinase (PI3K)	Reactome	R-BTA-9027276	1	8	0.430628	0.536853	GAB1	http://www.reactome.org/cgi-bin/eventbrowser_st_id?ST_ID=R-BTA-9027276
FGFR2c ligand binding and activation	Reactome	R-BTA-190375	1	8	0.430628	0.536853	FGF2	http://www.reactome.org/cgi-bin/eventbrowser_st_id?ST_ID=R-BTA-190375
Plasma lipoprotein remodeling	Reactome	R-BTA-8963899	1	8	0.430628	0.536853	LPL	http://www.reactome.org/cgi-bin/eventbrowser_st_id?ST_ID=R-BTA-8963899
NF-kB is activated and signals survival	Reactome	R-BTA-209560	1	8	0.430628	0.536853	UBA52	http://www.reactome.org/cgi-bin/eventbrowser_st_id?ST_ID=R-BTA-209560
WNT5A-dependent internalization of FZD4	Reactome	R-BTA-5099900	1	8	0.430628	0.536853	FZD4	http://www.reactome.org/cgi-bin/eventbrowser_st_id?ST_ID=R-BTA-5099900
Signaling by Erythropoietin	Reactome	R-BTA-9006335	1	8	0.430628	0.536853	GAB1	http://www.reactome.org/cgi-bin/eventbrowser_st_id?ST_ID=R-BTA-9006335
Transport of nucleotide sugars	Reactome	R-BTA-727802	1	8	0.430628	0.536853	SLC35B4	http://www.reactome.org/cgi-bin/eventbrowser_st_id?ST_ID=R-BTA-727802
Adenylate cyclase inhibitory pathway	Reactome	R-BTA-170670	1	8	0.430628	0.536853	GNAI3	http://www.reactome.org/cgi-bin/eventbrowser_st_id?ST_ID=R-BTA-170670
LGI-ADAM interactions	Reactome	R-BTA-5682910	1	8	0.430628	0.536853	STX1B	http://www.reactome.org/cgi-bin/eventbrowser_st_id?ST_ID=R-BTA-5682910
Ephrin signaling	Reactome	R-BTA-3928664	1	8	0.430628	0.536853	NCK2	http://www.reactome.org/cgi-bin/eventbrowser_st_id?ST_ID=R-BTA-3928664
Angiotensin II-stimulated signaling through G proteins and beta-arrestin	PANTHER	P05911	2	22	0.432118	0.536853	GNB1|GNAQ	http://www.pantherdb.org/pathway/pathwayDiagram.jsp?catAccession=P05911
Activation of ATR in response to replication stress	Reactome	R-BTA-176187	2	22	0.432118	0.536853	CDC6|CHEK1	http://www.reactome.org/cgi-bin/eventbrowser_st_id?ST_ID=R-BTA-176187
Cytochrome P450 - arranged by substrate type	Reactome	R-BTA-211897	2	22	0.432118	0.536853	CYP26B1|NCOA2	http://www.reactome.org/cgi-bin/eventbrowser_st_id?ST_ID=R-BTA-211897
Termination of translesion DNA synthesis	Reactome	R-BTA-5656169	2	22	0.432118	0.536853	UBA52|POLK	http://www.reactome.org/cgi-bin/eventbrowser_st_id?ST_ID=R-BTA-5656169
p75 NTR receptor-mediated signalling	Reactome	R-BTA-193704	3	37	0.440624	0.546698	RHOA|UBA52|ARHGEF26	http://www.reactome.org/cgi-bin/eventbrowser_st_id?ST_ID=R-BTA-193704
Glycerolipid metabolism	KEGG PATHWAY	bta00561	5	67	0.444757	0.551292	PLPP3|LPL|AGK|DGKH|DGKG	http://www.genome.jp/kegg-bin/show_pathway?bta00561/bta:280843%09red/bta:514693%09red/bta:537533%09red/bta:518523%09red/bta:617707%09red
PPAR signaling pathway	KEGG PATHWAY	bta03320	6	82	0.444936	0.551466	HMGCS2|ACSL3|ACSL6|ACSL4|LPL|SORBS1	http://www.genome.jp/kegg-bin/show_pathway?bta03320/bta:506059%09red/bta:100138312%09red/bta:503684%09red/bta:504625%09red/bta:280843%09red/bta:536628%09red
Mannose type O-glycan biosynthesis	KEGG PATHWAY	bta00515	2	23	0.453065	0.558887	FUT9|FKTN	http://www.genome.jp/kegg-bin/show_pathway?bta00515/bta:282853%09red/bta:536891%09red
Nuclear Envelope Breakdown	Reactome	R-BTA-2980766	2	23	0.453065	0.558887	NUP210|CNEP1R1	http://www.reactome.org/cgi-bin/eventbrowser_st_id?ST_ID=R-BTA-2980766
Intraflagellar transport	Reactome	R-BTA-5620924	3	38	0.456781	0.563028	CLUAP1|TUBB2A|TTC30B	http://www.reactome.org/cgi-bin/eventbrowser_st_id?ST_ID=R-BTA-5620924
Synaptic vesicle trafficking	PANTHER	P05734	1	9	0.465173	0.563371	STX1B	http://www.pantherdb.org/pathway/pathwayDiagram.jsp?catAccession=P05734
Formation of Senescence-Associated Heterochromatin Foci (SAHF)	Reactome	R-BTA-2559584	1	9	0.465173	0.563371	UBN1	http://www.reactome.org/cgi-bin/eventbrowser_st_id?ST_ID=R-BTA-2559584
G0 and Early G1	Reactome	R-BTA-1538133	1	9	0.465173	0.563371	TFDP1	http://www.reactome.org/cgi-bin/eventbrowser_st_id?ST_ID=R-BTA-1538133
Mitochondrial iron-sulfur cluster biogenesis	Reactome	R-BTA-1362409	1	9	0.465173	0.563371	FDX1	http://www.reactome.org/cgi-bin/eventbrowser_st_id?ST_ID=R-BTA-1362409
KSRP (KHSRP) binds and destabilizes mRNA	Reactome	R-BTA-450604	1	9	0.465173	0.563371	EXOSC8	http://www.reactome.org/cgi-bin/eventbrowser_st_id?ST_ID=R-BTA-450604
p75NTR recruits signalling complexes	Reactome	R-BTA-209543	1	9	0.465173	0.563371	UBA52	http://www.reactome.org/cgi-bin/eventbrowser_st_id?ST_ID=R-BTA-209543
Apoptosis induced DNA fragmentation	Reactome	R-BTA-140342	1	9	0.465173	0.563371	KPNA1	http://www.reactome.org/cgi-bin/eventbrowser_st_id?ST_ID=R-BTA-140342
Chondroitin sulfate biosynthesis	Reactome	R-BTA-2022870	1	9	0.465173	0.563371	CHSY1	http://www.reactome.org/cgi-bin/eventbrowser_st_id?ST_ID=R-BTA-2022870
Activation of BAD and translocation to mitochondria	Reactome	R-BTA-111447	1	9	0.465173	0.563371	PPP3R1	http://www.reactome.org/cgi-bin/eventbrowser_st_id?ST_ID=R-BTA-111447
Phase I - Functionalization of compounds	Reactome	R-BTA-211945	3	39	0.472737	0.569859	CYP26B1|NCOA2|ADH5	http://www.reactome.org/cgi-bin/eventbrowser_st_id?ST_ID=R-BTA-211945
Glycosaminoglycan biosynthesis - heparan sulfate / heparin	KEGG PATHWAY	bta00534	2	24	0.473562	0.569859	HS3ST3B1|HS3ST1	http://www.genome.jp/kegg-bin/show_pathway?bta00534/bta:617069%09red/bta:538691%09red
TP53 Regulates Transcription of Cell Cycle Genes	Reactome	R-BTA-6791312	2	24	0.473562	0.569859	CDKN1B|BTG2	http://www.reactome.org/cgi-bin/eventbrowser_st_id?ST_ID=R-BTA-6791312
Gap junction trafficking and regulation	Reactome	R-BTA-157858	2	24	0.473562	0.569859	TUBB2A|GJC1	http://www.reactome.org/cgi-bin/eventbrowser_st_id?ST_ID=R-BTA-157858
Gap junction trafficking	Reactome	R-BTA-190828	2	24	0.473562	0.569859	TUBB2A|GJC1	http://www.reactome.org/cgi-bin/eventbrowser_st_id?ST_ID=R-BTA-190828
Gap junction assembly	Reactome	R-BTA-190861	2	24	0.473562	0.569859	TUBB2A|GJC1	http://www.reactome.org/cgi-bin/eventbrowser_st_id?ST_ID=R-BTA-190861
Ub-specific processing proteases	Reactome	R-BTA-5689880	6	85	0.47732	0.574332	TADA2B|MAP3K7|SMAD1|UBA52|VDAC2|USP37	http://www.reactome.org/cgi-bin/eventbrowser_st_id?ST_ID=R-BTA-5689880
Necroptosis	KEGG PATHWAY	bta04217	12	177	0.477766	0.574819	STAT3|STAT1|IFNG|BIRC3|PARP1|TNFAIP3|CYBB|DNM1L|MAPK10|VDAC2|IL1A|MAPK9	http://www.genome.jp/kegg-bin/show_pathway?bta04217/bta:537631%09red/bta:540892%09red/bta:286764%09red/bta:282120%09red/bta:281237%09red/bta:281250%09red/bta:510814%09red/bta:508105%09red/bta:534125%09red/bta:281112%09red/bta:514386%09red/bta:508541%09red
Regulation of Insulin-like Growth Factor (IGF) transport and uptake by Insulin-like Growth Factor Binding Proteins (IGFBPs)	Reactome	R-BTA-381426	4	55	0.484194	0.582106	ADAM10|PDIA6|IGF1|SCG2	http://www.reactome.org/cgi-bin/eventbrowser_st_id?ST_ID=R-BTA-381426
Gap-filling DNA repair synthesis and ligation in TC-NER	Reactome	R-BTA-6782210	3	40	0.488474	0.586055	UBA52|POLK|ERCC6	http://www.reactome.org/cgi-bin/eventbrowser_st_id?ST_ID=R-BTA-6782210
Axon guidance mediated by Slit/Robo	PANTHER	P00008	1	10	0.497623	0.586055	NTN4	http://www.pantherdb.org/pathway/pathwayDiagram.jsp?catAccession=P00008
Alpha adrenergic receptor signaling pathway	PANTHER	P00002	1	10	0.497623	0.586055	SNAP25	http://www.pantherdb.org/pathway/pathwayDiagram.jsp?catAccession=P00002
JAK/STAT signaling pathway	PANTHER	P00038	1	10	0.497623	0.586055	STAT3	http://www.pantherdb.org/pathway/pathwayDiagram.jsp?catAccession=P00038
Phospholipase C-mediated cascade; FGFR4	Reactome	R-BTA-5654228	1	10	0.497623	0.586055	FGF2	http://www.reactome.org/cgi-bin/eventbrowser_st_id?ST_ID=R-BTA-5654228
TNF receptor superfamily (TNFSF) members mediating non-canonical NF-kB pathway	Reactome	R-BTA-5676594	1	10	0.497623	0.586055	TNFSF11	http://www.reactome.org/cgi-bin/eventbrowser_st_id?ST_ID=R-BTA-5676594
Phospholipase C-mediated cascade; FGFR2	Reactome	R-BTA-5654221	1	10	0.497623	0.586055	FGF2	http://www.reactome.org/cgi-bin/eventbrowser_st_id?ST_ID=R-BTA-5654221
RHO GTPases Activate NADPH Oxidases	Reactome	R-BTA-5668599	1	10	0.497623	0.586055	CYBB	http://www.reactome.org/cgi-bin/eventbrowser_st_id?ST_ID=R-BTA-5668599
Zinc transporters	Reactome	R-BTA-435354	1	10	0.497623	0.586055	SLC30A5	http://www.reactome.org/cgi-bin/eventbrowser_st_id?ST_ID=R-BTA-435354
Translesion synthesis by REV1	Reactome	R-BTA-110312	1	10	0.497623	0.586055	UBA52	http://www.reactome.org/cgi-bin/eventbrowser_st_id?ST_ID=R-BTA-110312
Nucleotide salvage	Reactome	R-BTA-8956321	1	10	0.497623	0.586055	DCK	http://www.reactome.org/cgi-bin/eventbrowser_st_id?ST_ID=R-BTA-8956321
VxPx cargo-targeting to cilium	Reactome	R-BTA-5620916	1	10	0.497623	0.586055	PKD2	http://www.reactome.org/cgi-bin/eventbrowser_st_id?ST_ID=R-BTA-5620916
Nicotinamide salvaging	Reactome	R-BTA-197264	1	10	0.497623	0.586055	PARP8	http://www.reactome.org/cgi-bin/eventbrowser_st_id?ST_ID=R-BTA-197264
Phase 4 - resting membrane potential	Reactome	R-BTA-5576886	1	10	0.497623	0.586055	KCNJ2	http://www.reactome.org/cgi-bin/eventbrowser_st_id?ST_ID=R-BTA-5576886
FGFR4 ligand binding and activation	Reactome	R-BTA-190322	1	10	0.497623	0.586055	FGF2	http://www.reactome.org/cgi-bin/eventbrowser_st_id?ST_ID=R-BTA-190322
Translesion synthesis by POLI	Reactome	R-BTA-5656121	1	10	0.497623	0.586055	UBA52	http://www.reactome.org/cgi-bin/eventbrowser_st_id?ST_ID=R-BTA-5656121
Metabolism of folate and pterines	Reactome	R-BTA-196757	1	10	0.497623	0.586055	ALDH1L2	http://www.reactome.org/cgi-bin/eventbrowser_st_id?ST_ID=R-BTA-196757
HS-GAG degradation	Reactome	R-BTA-2024096	1	10	0.497623	0.586055	GPC1	http://www.reactome.org/cgi-bin/eventbrowser_st_id?ST_ID=R-BTA-2024096
Unblocking of NMDA receptors, glutamate binding and activation	Reactome	R-BTA-438066	1	10	0.497623	0.586055	DLG3	http://www.reactome.org/cgi-bin/eventbrowser_st_id?ST_ID=R-BTA-438066
Endogenous sterols	Reactome	R-BTA-211976	1	10	0.497623	0.586055	NCOA2	http://www.reactome.org/cgi-bin/eventbrowser_st_id?ST_ID=R-BTA-211976
Signalling to ERKs	Reactome	R-BTA-187687	1	10	0.497623	0.586055	NRAS	http://www.reactome.org/cgi-bin/eventbrowser_st_id?ST_ID=R-BTA-187687
Glycerophospholipid metabolism	KEGG PATHWAY	bta00564	7	103	0.5038	0.592896	PLPP3|DGKH|ETNK1|GNPAT|LPGAT1|DGKG|GPCPD1	http://www.genome.jp/kegg-bin/show_pathway?bta00564/bta:538800%09red/bta:518523%09red/bta:540705%09red/bta:518469%09red/bta:541208%09red/bta:537533%09red/bta:617707%09red
Glycosaminoglycan metabolism	Reactome	R-BTA-1630316	4	57	0.51054	0.600214	GPC1|HS3ST3B1|HS3ST1|CHSY1	http://www.reactome.org/cgi-bin/eventbrowser_st_id?ST_ID=R-BTA-1630316
UCH proteinases	Reactome	R-BTA-5689603	4	57	0.51054	0.600214	PSMC2|PSMA5|UBA52|PSME3	http://www.reactome.org/cgi-bin/eventbrowser_st_id?ST_ID=R-BTA-5689603
Glycosylphosphatidylinositol (GPI)-anchor biosynthesis	KEGG PATHWAY	bta00563	2	26	0.513119	0.601891	PGAP1|PIGK	http://www.genome.jp/kegg-bin/show_pathway?bta00563/bta:508700%09red/bta:504677%09red
Renin-angiotensin system	KEGG PATHWAY	bta04614	2	26	0.513119	0.601891	ATP6AP2|NLN	http://www.genome.jp/kegg-bin/show_pathway?bta04614/bta:538650%09red/bta:513520%09red
Translesion synthesis by Y family DNA polymerases bypasses lesions on DNA template	Reactome	R-BTA-110313	2	26	0.513119	0.601891	UBA52|POLK	http://www.reactome.org/cgi-bin/eventbrowser_st_id?ST_ID=R-BTA-110313
Dual Incision in GG-NER	Reactome	R-BTA-5696400	2	26	0.513119	0.601891	UBA52|POLK	http://www.reactome.org/cgi-bin/eventbrowser_st_id?ST_ID=R-BTA-5696400
COPII-mediated vesicle transport	Reactome	R-BTA-204005	2	26	0.513119	0.601891	PPP6C|STX17	http://www.reactome.org/cgi-bin/eventbrowser_st_id?ST_ID=R-BTA-204005
Dual incision in TC-NER	Reactome	R-BTA-6782135	3	42	0.519236	0.608509	UBA52|POLK|ERCC6	http://www.reactome.org/cgi-bin/eventbrowser_st_id?ST_ID=R-BTA-6782135
Cytokine-cytokine receptor interaction	KEGG PATHWAY	bta04060	21	323	0.520069	0.609429	IFNW1|ACVR2A|TNFSF11|CXCL2|TNFRSF1B|BMP2|ACVR1C|IFNG|IL7R|INHBB|IL6ST|IL18R1|CLCF1|IL6R|BMPR2|LIFR|EDAR|IL1A|TNFRSF21|TGFB2|BMP7	http://www.genome.jp/kegg-bin/show_pathway?bta04060/bta:522155%09red/bta:534069%09red/bta:537922%09red/bta:513836%09red/bta:338033%09red/bta:530430%09red/bta:100336481%09red/bta:507359%09red/bta:539504%09red/bta:281237%09red/bta:281250%09red/bta:613947%09
Antigen processing-Cross presentation	Reactome	R-BTA-1236975	1	11	0.528105	0.609429	CYBB	http://www.reactome.org/cgi-bin/eventbrowser_st_id?ST_ID=R-BTA-1236975
Regulation of signaling by CBL	Reactome	R-BTA-912631	1	11	0.528105	0.609429	UBA52	http://www.reactome.org/cgi-bin/eventbrowser_st_id?ST_ID=R-BTA-912631
EPH-ephrin mediated repulsion of cells	Reactome	R-BTA-3928665	1	11	0.528105	0.609429	EFNA4	http://www.reactome.org/cgi-bin/eventbrowser_st_id?ST_ID=R-BTA-3928665
Heme biosynthesis	Reactome	R-BTA-189451	1	11	0.528105	0.609429	CPOX	http://www.reactome.org/cgi-bin/eventbrowser_st_id?ST_ID=R-BTA-189451
Platelet calcium homeostasis	Reactome	R-BTA-418360	1	11	0.528105	0.609429	ATP2A2	http://www.reactome.org/cgi-bin/eventbrowser_st_id?ST_ID=R-BTA-418360
p75NTR signals via NF-kB	Reactome	R-BTA-193639	1	11	0.528105	0.609429	UBA52	http://www.reactome.org/cgi-bin/eventbrowser_st_id?ST_ID=R-BTA-193639
FGFR2 ligand binding and activation	Reactome	R-BTA-190241	1	11	0.528105	0.609429	FGF2	http://www.reactome.org/cgi-bin/eventbrowser_st_id?ST_ID=R-BTA-190241
Antigen Presentation: Folding, assembly and peptide loading of class I MHC	Reactome	R-BTA-983170	1	11	0.528105	0.609429	CANX	http://www.reactome.org/cgi-bin/eventbrowser_st_id?ST_ID=R-BTA-983170
NRIF signals cell death from the nucleus	Reactome	R-BTA-205043	1	11	0.528105	0.609429	UBA52	http://www.reactome.org/cgi-bin/eventbrowser_st_id?ST_ID=R-BTA-205043
A tetrasaccharide linker sequence is required for GAG synthesis	Reactome	R-BTA-1971475	1	11	0.528105	0.609429	GPC1	http://www.reactome.org/cgi-bin/eventbrowser_st_id?ST_ID=R-BTA-1971475
Regulation of PLK1 Activity at G2/M Transition	Reactome	R-BTA-2565942	3	43	0.534235	0.61464	CEP76|UBA52|ACTR1A	http://www.reactome.org/cgi-bin/eventbrowser_st_id?ST_ID=R-BTA-2565942
Type I diabetes mellitus	KEGG PATHWAY	bta04940	4	59	0.536254	0.616612	IFNG|IL1A|CD28|CPE	http://www.genome.jp/kegg-bin/show_pathway?bta04940/bta:280753%09red/bta:281050%09red/bta:281237%09red/bta:281250%09red
ABC transporters	KEGG PATHWAY	bta02010	4	60	0.548854	0.628025	ABCD3|ABCD2|ABCG5|ABCA3	http://www.genome.jp/kegg-bin/show_pathway?bta02010/bta:526436%09red/bta:526059%09red/bta:505787%09red/bta:515536%09red
RUNX1 regulates genes involved in megakaryocyte differentiation and platelet function	Reactome	R-BTA-8936459	3	44	0.548964	0.628025	CBFB|PRMT6|ASH2L	http://www.reactome.org/cgi-bin/eventbrowser_st_id?ST_ID=R-BTA-8936459
RHO GTPases activate PKNs	Reactome	R-BTA-5625740	3	44	0.548964	0.628025	NCOA2|RHOB|RHOA	http://www.reactome.org/cgi-bin/eventbrowser_st_id?ST_ID=R-BTA-5625740
Butanoate metabolism	KEGG PATHWAY	bta00650	2	28	0.550659	0.628025	HMGCS2|HMGCLL1	http://www.genome.jp/kegg-bin/show_pathway?bta00650/bta:503684%09red/bta:535508%09red
Collecting duct acid secretion	KEGG PATHWAY	bta04966	2	28	0.550659	0.628025	ATP6V1C2|ATP6V1G1	http://www.genome.jp/kegg-bin/show_pathway?bta04966/bta:281641%09red/bta:508327%09red
Signaling by NTRK1 (TRKA)	Reactome	R-BTA-187037	2	28	0.550659	0.628025	RHOA|NRAS	http://www.reactome.org/cgi-bin/eventbrowser_st_id?ST_ID=R-BTA-187037
Cargo trafficking to the periciliary membrane	Reactome	R-BTA-5620920	2	28	0.550659	0.628025	SMO|PKD2	http://www.reactome.org/cgi-bin/eventbrowser_st_id?ST_ID=R-BTA-5620920
Cell death signalling via NRAGE, NRIF and NADE	Reactome	R-BTA-204998	2	28	0.550659	0.628025	UBA52|ARHGEF26	http://www.reactome.org/cgi-bin/eventbrowser_st_id?ST_ID=R-BTA-204998
Formation of Incision Complex in GG-NER	Reactome	R-BTA-5696395	2	28	0.550659	0.628025	SUMO1|UBA52	http://www.reactome.org/cgi-bin/eventbrowser_st_id?ST_ID=R-BTA-5696395
Metabolism of amino acids and derivatives	Reactome	R-BTA-71291	7	108	0.551438	0.628025	PDHA1|PPM1K|GATM|RIMKLB|PAH|SLC25A12|GCSH	http://www.reactome.org/cgi-bin/eventbrowser_st_id?ST_ID=R-BTA-71291
Major pathway of rRNA processing in the nucleolus and cytosol	Reactome	R-BTA-6791226	8	124	0.552631	0.628025	BMS1|ISG20L2|LTV1|DDX52|EXOSC8|UBA52|NIP7|WDR3	http://www.reactome.org/cgi-bin/eventbrowser_st_id?ST_ID=R-BTA-6791226
rRNA processing in the nucleus and cytosol	Reactome	R-BTA-8868773	8	124	0.552631	0.628025	BMS1|ISG20L2|LTV1|DDX52|EXOSC8|UBA52|NIP7|WDR3	http://www.reactome.org/cgi-bin/eventbrowser_st_id?ST_ID=R-BTA-8868773
rRNA processing	Reactome	R-BTA-72312	8	124	0.552631	0.628025	BMS1|ISG20L2|LTV1|DDX52|EXOSC8|UBA52|NIP7|WDR3	http://www.reactome.org/cgi-bin/eventbrowser_st_id?ST_ID=R-BTA-72312
Branched-chain amino acid catabolism	Reactome	R-BTA-70895	1	12	0.556739	0.628025	PPM1K	http://www.reactome.org/cgi-bin/eventbrowser_st_id?ST_ID=R-BTA-70895
Pyruvate metabolism	Reactome	R-BTA-70268	1	12	0.556739	0.628025	PDHA1	http://www.reactome.org/cgi-bin/eventbrowser_st_id?ST_ID=R-BTA-70268
@@Pyruvate metabolism	KEGG PATHWAY	bta00620	2	38	0.706941	0.74897	PDHA1|DLAT	http://www.genome.jp/kegg-bin/show_pathway?bta00620/bta:407109%09red/bta:512723%09red
FCERI mediated Ca+2 mobilization	Reactome	R-BTA-2871809	1	12	0.556739	0.628025	PPP3R1	http://www.reactome.org/cgi-bin/eventbrowser_st_id?ST_ID=R-BTA-2871809
mRNA decay by 3' to 5' exoribonuclease	Reactome	R-BTA-429958	1	12	0.556739	0.628025	EXOSC8	http://www.reactome.org/cgi-bin/eventbrowser_st_id?ST_ID=R-BTA-429958
Regulation of necroptotic cell death	Reactome	R-BTA-5675482	1	12	0.556739	0.628025	UBA52	http://www.reactome.org/cgi-bin/eventbrowser_st_id?ST_ID=R-BTA-5675482
Processing of Intronless Pre-mRNAs	Reactome	R-BTA-77595	1	12	0.556739	0.628025	CPSF2	http://www.reactome.org/cgi-bin/eventbrowser_st_id?ST_ID=R-BTA-77595
Tie2 Signaling	Reactome	R-BTA-210993	1	12	0.556739	0.628025	NRAS	http://www.reactome.org/cgi-bin/eventbrowser_st_id?ST_ID=R-BTA-210993
TP53 regulates transcription of additional cell cycle genes whose exact role in the p53 pathway remain uncertain	Reactome	R-BTA-6804115	1	12	0.556739	0.628025	BTG2	http://www.reactome.org/cgi-bin/eventbrowser_st_id?ST_ID=R-BTA-6804115
Formation of the beta-catenin:TCF transactivating complex	Reactome	R-BTA-201722	3	45	0.563416	0.634388	CDC73|CREBBP|ASH2L	http://www.reactome.org/cgi-bin/eventbrowser_st_id?ST_ID=R-BTA-201722
TP53 Regulates Transcription of DNA Repair Genes	Reactome	R-BTA-6796648	2	29	0.568648	0.639259	SUPT16H|CCNT2	http://www.reactome.org/cgi-bin/eventbrowser_st_id?ST_ID=R-BTA-6796648
RNA Polymerase I Transcription Initiation	Reactome	R-BTA-73762	2	29	0.568648	0.639259	TWISTNB|ERCC6	http://www.reactome.org/cgi-bin/eventbrowser_st_id?ST_ID=R-BTA-73762
Formation of the cornified envelope	Reactome	R-BTA-6809371	3	46	0.577581	0.648096	DSG2|DSG3|LELP1	http://www.reactome.org/cgi-bin/eventbrowser_st_id?ST_ID=R-BTA-6809371
Complex I biogenesis	Reactome	R-BTA-6799198	3	46	0.577581	0.648096	NDUFB6|NDUFS2|NDUFA5	http://www.reactome.org/cgi-bin/eventbrowser_st_id?ST_ID=R-BTA-6799198
Stimuli-sensing channels	Reactome	R-BTA-2672351	3	46	0.577581	0.648096	WNK3|UBA52|SGK1	http://www.reactome.org/cgi-bin/eventbrowser_st_id?ST_ID=R-BTA-2672351
Phospholipid metabolism	Reactome	R-BTA-1483257	6	95	0.580196	0.648096	OSBPL10|CPNE3|MTM1|MTMR4|PLEKHA8|RAB14	http://www.reactome.org/cgi-bin/eventbrowser_st_id?ST_ID=R-BTA-1483257
Taurine and hypotaurine metabolism	KEGG PATHWAY	bta00430	1	13	0.583636	0.648096	CDO1	http://www.genome.jp/kegg-bin/show_pathway?bta00430/bta:514462%09red
RAF activation	Reactome	R-BTA-5673000	1	13	0.583636	0.648096	NRAS	http://www.reactome.org/cgi-bin/eventbrowser_st_id?ST_ID=R-BTA-5673000
RIPK1-mediated regulated necrosis	Reactome	R-BTA-5213460	1	13	0.583636	0.648096	UBA52	http://www.reactome.org/cgi-bin/eventbrowser_st_id?ST_ID=R-BTA-5213460
Regulated Necrosis	Reactome	R-BTA-5218859	1	13	0.583636	0.648096	UBA52	http://www.reactome.org/cgi-bin/eventbrowser_st_id?ST_ID=R-BTA-5218859
Generation of second messenger molecules	Reactome	R-BTA-202433	1	13	0.583636	0.648096	NCK1	http://www.reactome.org/cgi-bin/eventbrowser_st_id?ST_ID=R-BTA-202433
Carboxyterminal post-translational modifications of tubulin	Reactome	R-BTA-8955332	1	13	0.583636	0.648096	TUBB2A	http://www.reactome.org/cgi-bin/eventbrowser_st_id?ST_ID=R-BTA-8955332
Microtubule-dependent trafficking of connexons from Golgi to the plasma membrane	Reactome	R-BTA-190840	1	13	0.583636	0.648096	TUBB2A	http://www.reactome.org/cgi-bin/eventbrowser_st_id?ST_ID=R-BTA-190840
Amplification of signal from the kinetochores	Reactome	R-BTA-141424	4	63	0.585533	0.649206	DYNC1I1|CENPK|DSN1|TAOK1	http://www.reactome.org/cgi-bin/eventbrowser_st_id?ST_ID=R-BTA-141424
Amplification of signal from unattached kinetochores via a MAD2 inhibitory signal	Reactome	R-BTA-141444	4	63	0.585533	0.649206	DYNC1I1|CENPK|DSN1|TAOK1	http://www.reactome.org/cgi-bin/eventbrowser_st_id?ST_ID=R-BTA-141444
trans-Golgi Network Vesicle Budding	Reactome	R-BTA-199992	2	30	0.58611	0.649206	CLVS2|AP1S3	http://www.reactome.org/cgi-bin/eventbrowser_st_id?ST_ID=R-BTA-199992
DNA Damage Bypass	Reactome	R-BTA-73893	2	30	0.58611	0.649206	UBA52|POLK	http://www.reactome.org/cgi-bin/eventbrowser_st_id?ST_ID=R-BTA-73893
Respiratory electron transport	Reactome	R-BTA-611105	3	47	0.591453	0.654816	NDUFB6|NDUFS2|NDUFA5	http://www.reactome.org/cgi-bin/eventbrowser_st_id?ST_ID=R-BTA-611105
Transport of bile salts and organic acids, metal ions and amine compounds	Reactome	R-BTA-425366	3	47	0.591453	0.654816	SLC30A5|SLC6A15|SLC6A14	http://www.reactome.org/cgi-bin/eventbrowser_st_id?ST_ID=R-BTA-425366
Metabolism of water-soluble vitamins and cofactors	Reactome	R-BTA-196849	4	64	0.597367	0.661001	TPK1|ALDH1L2|PANK3|PARP8	http://www.reactome.org/cgi-bin/eventbrowser_st_id?ST_ID=R-BTA-196849
Mucin type O-glycan biosynthesis	KEGG PATHWAY	bta00512	2	31	0.603041	0.666129	GALNT18|GALNT3	http://www.genome.jp/kegg-bin/show_pathway?bta00512/bta:535458%09red/bta:614203%09red
Graft-versus-host disease	KEGG PATHWAY	bta05332	3	48	0.605026	0.666129	IFNG|IL1A|CD28	http://www.genome.jp/kegg-bin/show_pathway?bta05332/bta:281050%09red/bta:281237%09red/bta:281250%09red
Recruitment of NuMA to mitotic centrosomes	Reactome	R-BTA-380320	3	48	0.605026	0.666129	CEP76|TUBB2A|ACTR1A	http://www.reactome.org/cgi-bin/eventbrowser_st_id?ST_ID=R-BTA-380320
DNA Double Strand Break Response	Reactome	R-BTA-5693606	3	48	0.605026	0.666129	SUMO1|UBA52|KPNA2	http://www.reactome.org/cgi-bin/eventbrowser_st_id?ST_ID=R-BTA-5693606
Synthesis of bile acids and bile salts via 7alpha-hydroxycholesterol	Reactome	R-BTA-193368	1	14	0.608902	0.666129	NCOA2	http://www.reactome.org/cgi-bin/eventbrowser_st_id?ST_ID=R-BTA-193368
Transport of connexons to the plasma membrane	Reactome	R-BTA-190872	1	14	0.608902	0.666129	TUBB2A	http://www.reactome.org/cgi-bin/eventbrowser_st_id?ST_ID=R-BTA-190872
Translesion Synthesis by POLH	Reactome	R-BTA-110320	1	14	0.608902	0.666129	UBA52	http://www.reactome.org/cgi-bin/eventbrowser_st_id?ST_ID=R-BTA-110320
Surfactant metabolism	Reactome	R-BTA-5683826	1	14	0.608902	0.666129	ABCA3	http://www.reactome.org/cgi-bin/eventbrowser_st_id?ST_ID=R-BTA-5683826
Pink/Parkin Mediated Mitophagy	Reactome	R-BTA-5205685	1	14	0.608902	0.666129	UBA52	http://www.reactome.org/cgi-bin/eventbrowser_st_id?ST_ID=R-BTA-5205685
BBSome-mediated cargo-targeting to cilium	Reactome	R-BTA-5620922	1	14	0.608902	0.666129	SMO	http://www.reactome.org/cgi-bin/eventbrowser_st_id?ST_ID=R-BTA-5620922
Acyl chain remodelling of PS	Reactome	R-BTA-1482801	1	14	0.608902	0.666129	OSBPL10	http://www.reactome.org/cgi-bin/eventbrowser_st_id?ST_ID=R-BTA-1482801
WNT ligand biogenesis and trafficking	Reactome	R-BTA-3238698	1	14	0.608902	0.666129	VPS35	http://www.reactome.org/cgi-bin/eventbrowser_st_id?ST_ID=R-BTA-3238698
Cysteine and methionine metabolism	KEGG PATHWAY	bta00270	3	49	0.618297	0.675516	DNMT3B|CDO1|AHCYL2	http://www.genome.jp/kegg-bin/show_pathway?bta00270/bta:353354%09red/bta:532836%09red/bta:514462%09red
Nicotinate and nicotinamide metabolism	KEGG PATHWAY	bta00760	2	32	0.619443	0.676192	ENPP3|NT5C2	http://www.genome.jp/kegg-bin/show_pathway?bta00760/bta:529405%09red/bta:281951%09red
Cell Cycle Checkpoints	Reactome	R-BTA-69620	9	149	0.62492	0.682012	CENPK|SUMO1|CDKN1B|DSN1|DYNC1I1|UBA52|TAOK1|CDC6|CHEK1	http://www.reactome.org/cgi-bin/eventbrowser_st_id?ST_ID=R-BTA-69620
Cholesterol metabolism	KEGG PATHWAY	bta04979	3	50	0.631261	0.685497	VDAC2|LPL|ABCG5	http://www.genome.jp/kegg-bin/show_pathway?bta04979/bta:280843%09red/bta:282120%09red/bta:515536%09red
Transcription-Coupled Nucleotide Excision Repair (TC-NER)	Reactome	R-BTA-6781827	3	50	0.631261	0.685497	UBA52|POLK|ERCC6	http://www.reactome.org/cgi-bin/eventbrowser_st_id?ST_ID=R-BTA-6781827
Protein localization	Reactome	R-BTA-9609507	4	67	0.631624	0.685497	SLC25A17|ABCD3|PEX12|UBA52	http://www.reactome.org/cgi-bin/eventbrowser_st_id?ST_ID=R-BTA-9609507
Adherens junctions interactions	Reactome	R-BTA-418990	1	15	0.632635	0.685497	CADM1	http://www.reactome.org/cgi-bin/eventbrowser_st_id?ST_ID=R-BTA-418990
Nicotinate metabolism	Reactome	R-BTA-196807	1	15	0.632635	0.685497	PARP8	http://www.reactome.org/cgi-bin/eventbrowser_st_id?ST_ID=R-BTA-196807
Smooth Muscle Contraction	Reactome	R-BTA-445355	1	15	0.632635	0.685497	SORBS1	http://www.reactome.org/cgi-bin/eventbrowser_st_id?ST_ID=R-BTA-445355
HSF1-dependent transactivation	Reactome	R-BTA-3371571	1	15	0.632635	0.685497	CREBBP	http://www.reactome.org/cgi-bin/eventbrowser_st_id?ST_ID=R-BTA-3371571
NRAGE signals death through JNK	Reactome	R-BTA-193648	1	15	0.632635	0.685497	ARHGEF26	http://www.reactome.org/cgi-bin/eventbrowser_st_id?ST_ID=R-BTA-193648
Metabolism of porphyrins	Reactome	R-BTA-189445	1	15	0.632635	0.685497	CPOX	http://www.reactome.org/cgi-bin/eventbrowser_st_id?ST_ID=R-BTA-189445
Base excision repair	KEGG PATHWAY	bta03410	2	33	0.635316	0.68745	TDG|PARP1	http://www.genome.jp/kegg-bin/show_pathway?bta03410/bta:286764%09red/bta:517825%09red
@@Base Excision Repair	Reactome	R-BTA-73884	1	53	0.966017	0.9716	TDG	http://www.reactome.org/cgi-bin/eventbrowser_st_id?ST_ID=R-BTA-73884
Formation of TC-NER Pre-Incision Complex	Reactome	R-BTA-6781823	2	33	0.635316	0.68745	UBA52|ERCC6	http://www.reactome.org/cgi-bin/eventbrowser_st_id?ST_ID=R-BTA-6781823
Positive epigenetic regulation of rRNA expression	Reactome	R-BTA-5250913	3	51	0.643916	0.695901	DEK|TWISTNB|ERCC6	http://www.reactome.org/cgi-bin/eventbrowser_st_id?ST_ID=R-BTA-5250913
B-WICH complex positively regulates rRNA expression	Reactome	R-BTA-5250924	3	51	0.643916	0.695901	DEK|TWISTNB|ERCC6	http://www.reactome.org/cgi-bin/eventbrowser_st_id?ST_ID=R-BTA-5250924
HDR through Homologous Recombination (HRR)	Reactome	R-BTA-5685942	2	34	0.650665	0.702388	UBA52|POLK	http://www.reactome.org/cgi-bin/eventbrowser_st_id?ST_ID=R-BTA-5685942
Loss of proteins required for interphase microtubule organization from the centrosome	Reactome	R-BTA-380284	2	34	0.650665	0.702388	CEP76|ACTR1A	http://www.reactome.org/cgi-bin/eventbrowser_st_id?ST_ID=R-BTA-380284
Loss of Nlp from mitotic centrosomes	Reactome	R-BTA-380259	2	34	0.650665	0.702388	CEP76|ACTR1A	http://www.reactome.org/cgi-bin/eventbrowser_st_id?ST_ID=R-BTA-380259
G2/M Checkpoints	Reactome	R-BTA-69481	4	69	0.65339	0.704186	SUMO1|UBA52|CDC6|CHEK1	http://www.reactome.org/cgi-bin/eventbrowser_st_id?ST_ID=R-BTA-69481
Mitophagy	Reactome	R-BTA-5205647	1	16	0.654929	0.704186	UBA52	http://www.reactome.org/cgi-bin/eventbrowser_st_id?ST_ID=R-BTA-5205647
Metal ion SLC transporters	Reactome	R-BTA-425410	1	16	0.654929	0.704186	SLC30A5	http://www.reactome.org/cgi-bin/eventbrowser_st_id?ST_ID=R-BTA-425410
Processing of Capped Intronless Pre-mRNA	Reactome	R-BTA-75067	1	16	0.654929	0.704186	CPSF2	http://www.reactome.org/cgi-bin/eventbrowser_st_id?ST_ID=R-BTA-75067
Ether lipid metabolism	KEGG PATHWAY	bta00565	3	52	0.656261	0.705564	UGT8|PLPP3|PAFAH1B1	http://www.genome.jp/kegg-bin/show_pathway?bta00565/bta:282513%09red/bta:281566%09red/bta:617707%09red
AURKA Activation by TPX2	Reactome	R-BTA-8854518	2	35	0.665495	0.714729	CEP76|ACTR1A	http://www.reactome.org/cgi-bin/eventbrowser_st_id?ST_ID=R-BTA-8854518
Peroxisomal protein import	Reactome	R-BTA-9033241	2	35	0.665495	0.714729	UBA52|PEX12	http://www.reactome.org/cgi-bin/eventbrowser_st_id?ST_ID=R-BTA-9033241
Post-translational protein phosphorylation	Reactome	R-BTA-8957275	3	53	0.668295	0.717681	ADAM10|PDIA6|SCG2	http://www.reactome.org/cgi-bin/eventbrowser_st_id?ST_ID=R-BTA-8957275
Nucleotide Excision Repair	Reactome	R-BTA-5696398	4	71	0.674277	0.721475	SUMO1|UBA52|POLK|ERCC6	http://www.reactome.org/cgi-bin/eventbrowser_st_id?ST_ID=R-BTA-5696398
@@Nucleotide excision repair	KEGG PATHWAY	bta03420	1	45	0.943892	0.950772	ERCC6	http://www.genome.jp/kegg-bin/show_pathway?bta03420/bta:522908%09red
Glycosphingolipid biosynthesis - globo and isoglobo series	KEGG PATHWAY	bta00603	1	17	0.675871	0.721475	FUT9	http://www.genome.jp/kegg-bin/show_pathway?bta00603/bta:282853%09red
Nitrogen metabolism	KEGG PATHWAY	bta00910	1	17	0.675871	0.721475	CA8	http://www.genome.jp/kegg-bin/show_pathway?bta00910/bta:515918%09red
Primary bile acid biosynthesis	KEGG PATHWAY	bta00120	1	17	0.675871	0.721475	CH25H	http://www.genome.jp/kegg-bin/show_pathway?bta00120/bta:506132%09red
APC/C:Cdc20 mediated degradation of Cyclin B	Reactome	R-BTA-174048	1	17	0.675871	0.721475	UBA52	http://www.reactome.org/cgi-bin/eventbrowser_st_id?ST_ID=R-BTA-174048
Cell-cell junction organization	Reactome	R-BTA-421270	1	17	0.675871	0.721475	CADM1	http://www.reactome.org/cgi-bin/eventbrowser_st_id?ST_ID=R-BTA-421270
Peroxisomal lipid metabolism	Reactome	R-BTA-390918	1	17	0.675871	0.721475	SLC25A17	http://www.reactome.org/cgi-bin/eventbrowser_st_id?ST_ID=R-BTA-390918
Deadenylation of mRNA	Reactome	R-BTA-429947	1	17	0.675871	0.721475	PAN2	http://www.reactome.org/cgi-bin/eventbrowser_st_id?ST_ID=R-BTA-429947
Nuclear Pore Complex (NPC) Disassembly	Reactome	R-BTA-3301854	1	17	0.675871	0.721475	NUP210	http://www.reactome.org/cgi-bin/eventbrowser_st_id?ST_ID=R-BTA-3301854
Ovarian steroidogenesis	KEGG PATHWAY	bta04913	3	54	0.680017	0.724967	IGF1R|IGF1|PRKACB	http://www.genome.jp/kegg-bin/show_pathway?bta04913/bta:281239%09red/bta:282323%09red/bta:281848%09red
Herpes simplex virus 1 infection	KEGG PATHWAY	bta05168	24	405	0.688536	0.733883	BCL2L1|BIRC3|AKT2|AKT3|ZNF16|ZNF599|SRSF5|STAT1|SRSF2|MAP3K7|ZNF282|APAF1|ZFP28|NXF1|IFNG|ZNF304|CHUK|ZNF23|HCFC1|EIF2AK3|ZNF845|BAK1|ZNF548|POU2F1	http://www.genome.jp/kegg-bin/show_pathway?bta05168/bta:508312%09red/bta:512840%09red/bta:510814%09red/bta:514021%09red/bta:514386%09red/bta:512136%09red/bta:282152%09red/bta:535820%09red/bta:514090%09red/bta:100294758%09red/bta:100137872%09red/bta:101906
Global Genome Nucleotide Excision Repair (GG-NER)	Reactome	R-BTA-5696399	3	55	0.691428	0.736687	SUMO1|UBA52|POLK	http://www.reactome.org/cgi-bin/eventbrowser_st_id?ST_ID=R-BTA-5696399
Alanine, aspartate and glutamate metabolism	KEGG PATHWAY	bta00250	2	37	0.693625	0.73778	GLS|RIMKLB	http://www.genome.jp/kegg-bin/show_pathway?bta00250/bta:525335%09red/bta:538579%09red
G2/M Transition	Reactome	R-BTA-69275	4	73	0.694275	0.73778	CEP76|TUBB2A|UBA52|ACTR1A	http://www.reactome.org/cgi-bin/eventbrowser_st_id?ST_ID=R-BTA-69275
General transcription regulation	PANTHER	P00023	1	18	0.695542	0.73778	GTF2A1	http://www.pantherdb.org/pathway/pathwayDiagram.jsp?catAccession=P00023
Cdc20:Phospho-APC/C mediated degradation of Cyclin A	Reactome	R-BTA-174184	1	18	0.695542	0.73778	UBA52	http://www.reactome.org/cgi-bin/eventbrowser_st_id?ST_ID=R-BTA-174184
Gamma carboxylation, hypusine formation and arylsulfatase activation	Reactome	R-BTA-163841	1	18	0.695542	0.73778	DPH6	http://www.reactome.org/cgi-bin/eventbrowser_st_id?ST_ID=R-BTA-163841
Regulation of TP53 Activity through Acetylation	Reactome	R-BTA-6804758	1	18	0.695542	0.73778	ING2	http://www.reactome.org/cgi-bin/eventbrowser_st_id?ST_ID=R-BTA-6804758
APC-Cdc20 mediated degradation of Nek2A	Reactome	R-BTA-179409	1	18	0.695542	0.73778	UBA52	http://www.reactome.org/cgi-bin/eventbrowser_st_id?ST_ID=R-BTA-179409
HATs acetylate histones	Reactome	R-BTA-3214847	2	38	0.706941	0.74897	NCOA2|PAX3	http://www.reactome.org/cgi-bin/eventbrowser_st_id?ST_ID=R-BTA-3214847
Hematopoietic cell lineage	KEGG PATHWAY	bta04640	6	110	0.712397	0.752961	IL7R|IL6R|GYPA|IL1A|KITLG|CD9	http://www.genome.jp/kegg-bin/show_pathway?bta04640/bta:617836%09red/bta:521554%09red/bta:281250%09red/bta:280746%09red/bta:281885%09red/bta:507359%09red
Mitotic G2-G2/M phases	Reactome	R-BTA-453274	4	75	0.713379	0.752961	CEP76|TUBB2A|UBA52|ACTR1A	http://www.reactome.org/cgi-bin/eventbrowser_st_id?ST_ID=R-BTA-453274
Arginine biosynthesis	KEGG PATHWAY	bta00220	1	19	0.71402	0.752961	GLS	http://www.genome.jp/kegg-bin/show_pathway?bta00220/bta:525335%09red
Degradation of beta-catenin by the destruction complex	Reactome	R-BTA-195253	1	19	0.71402	0.752961	UBA52	http://www.reactome.org/cgi-bin/eventbrowser_st_id?ST_ID=R-BTA-195253
RHO GTPases activate IQGAPs	Reactome	R-BTA-5626467	1	19	0.71402	0.752961	TUBB2A	http://www.reactome.org/cgi-bin/eventbrowser_st_id?ST_ID=R-BTA-5626467
Signaling by Retinoic Acid	Reactome	R-BTA-5362517	1	19	0.71402	0.752961	PDHA1	http://www.reactome.org/cgi-bin/eventbrowser_st_id?ST_ID=R-BTA-5362517
Recognition of DNA damage by PCNA-containing replication complex	Reactome	R-BTA-110314	1	19	0.71402	0.752961	UBA52	http://www.reactome.org/cgi-bin/eventbrowser_st_id?ST_ID=R-BTA-110314
DAP12 interactions	Reactome	R-BTA-2172127	1	19	0.71402	0.752961	NRAS	http://www.reactome.org/cgi-bin/eventbrowser_st_id?ST_ID=R-BTA-2172127
DAP12 signaling	Reactome	R-BTA-2424491	1	19	0.71402	0.752961	NRAS	http://www.reactome.org/cgi-bin/eventbrowser_st_id?ST_ID=R-BTA-2424491
TBC/RABGAPs	Reactome	R-BTA-8854214	1	19	0.71402	0.752961	ARF6	http://www.reactome.org/cgi-bin/eventbrowser_st_id?ST_ID=R-BTA-8854214
APC:Cdc20 mediated degradation of cell cycle proteins prior to satisfation of the cell cycle checkpoint	Reactome	R-BTA-179419	1	19	0.71402	0.752961	UBA52	http://www.reactome.org/cgi-bin/eventbrowser_st_id?ST_ID=R-BTA-179419
Golgi Associated Vesicle Biogenesis	Reactome	R-BTA-432722	1	19	0.71402	0.752961	AP1S3	http://www.reactome.org/cgi-bin/eventbrowser_st_id?ST_ID=R-BTA-432722
Primary immunodeficiency	KEGG PATHWAY	bta05340	2	39	0.71977	0.75857	IL7R|AICDA	http://www.genome.jp/kegg-bin/show_pathway?bta05340/bta:521554%09red/bta:539888%09red
Deadenylation-dependent mRNA decay	Reactome	R-BTA-429914	2	39	0.71977	0.75857	PAN2|EXOSC8	http://www.reactome.org/cgi-bin/eventbrowser_st_id?ST_ID=R-BTA-429914
Mitotic Spindle Checkpoint	Reactome	R-BTA-69618	4	76	0.722597	0.761379	DYNC1I1|CENPK|DSN1|TAOK1	http://www.reactome.org/cgi-bin/eventbrowser_st_id?ST_ID=R-BTA-69618
RNA Polymerase I Transcription Termination	Reactome	R-BTA-73863	1	20	0.731378	0.767876	TWISTNB	http://www.reactome.org/cgi-bin/eventbrowser_st_id?ST_ID=R-BTA-73863
Glycosphingolipid metabolism	Reactome	R-BTA-1660662	1	20	0.731378	0.767876	UGCG	http://www.reactome.org/cgi-bin/eventbrowser_st_id?ST_ID=R-BTA-1660662
Metalloprotease DUBs	Reactome	R-BTA-5689901	1	20	0.731378	0.767876	UBA52	http://www.reactome.org/cgi-bin/eventbrowser_st_id?ST_ID=R-BTA-5689901
Activation of the pre-replicative complex	Reactome	R-BTA-68962	1	20	0.731378	0.767876	CDC6	http://www.reactome.org/cgi-bin/eventbrowser_st_id?ST_ID=R-BTA-68962
Deposition of new CENPA-containing nucleosomes at the centromere	Reactome	R-BTA-606279	2	40	0.732121	0.76797	CENPK|HJURP	http://www.reactome.org/cgi-bin/eventbrowser_st_id?ST_ID=R-BTA-606279
Nucleosome assembly	Reactome	R-BTA-774815	2	40	0.732121	0.76797	CENPK|HJURP	http://www.reactome.org/cgi-bin/eventbrowser_st_id?ST_ID=R-BTA-774815
Viral protein interaction with cytokine and cytokine receptor	KEGG PATHWAY	bta04061	5	95	0.732498	0.768137	IL6R|CXCL2|TNFRSF1B|IL18R1|IL6ST	http://www.genome.jp/kegg-bin/show_pathway?bta04061/bta:522155%09red/bta:407221%09red/bta:281214%09red/bta:507359%09red/bta:338033%09red
Metabolism of vitamins and cofactors	Reactome	R-BTA-196854	5	95	0.732498	0.768137	TPK1|GPC1|PANK3|PARP8|ALDH1L2	http://www.reactome.org/cgi-bin/eventbrowser_st_id?ST_ID=R-BTA-196854
Carbon metabolism	KEGG PATHWAY	bta01200	6	113	0.735066	0.770542	PDHA1|ADH5|PFKM|DLAT|SDHD|GCSH	http://www.genome.jp/kegg-bin/show_pathway?bta01200/bta:506544%09red/bta:407109%09red/bta:505515%09red/bta:317723%09red/bta:512723%09red/bta:281481%09red
Natural killer cell mediated cytotoxicity	KEGG PATHWAY	bta04650	7	131	0.738529	0.774116	PPP3R1|IFNG|VAV3|VAV2|NRAS|PLCG2|MAPK1	http://www.genome.jp/kegg-bin/show_pathway?bta04650/bta:515718%09red/bta:100337091%09red/bta:521961%09red/bta:281237%09red/bta:282321%09red/bta:506322%09red/bta:327672%09red
Centrosome maturation	Reactome	R-BTA-380287	2	41	0.744007	0.779046	CEP76|ACTR1A	http://www.reactome.org/cgi-bin/eventbrowser_st_id?ST_ID=R-BTA-380287
Recruitment of mitotic centrosome proteins and complexes	Reactome	R-BTA-380270	2	41	0.744007	0.779046	CEP76|ACTR1A	http://www.reactome.org/cgi-bin/eventbrowser_st_id?ST_ID=R-BTA-380270
Pyruvate metabolism and Citric Acid (TCA) cycle	Reactome	R-BTA-71406	1	21	0.747682	0.780691	PDHA1	http://www.reactome.org/cgi-bin/eventbrowser_st_id?ST_ID=R-BTA-71406
Retinoid metabolism and transport	Reactome	R-BTA-975634	1	21	0.747682	0.780691	GPC1	http://www.reactome.org/cgi-bin/eventbrowser_st_id?ST_ID=R-BTA-975634
Homologous recombination	KEGG PATHWAY	bta03440	2	42	0.755437	0.787912	BRCA1|TOP3A	http://www.genome.jp/kegg-bin/show_pathway?bta03440/bta:353120%09red/bta:527411%09red
Keratinization	Reactome	R-BTA-6805567	3	62	0.762779	0.794622	DSG2|DSG3|LELP1	http://www.reactome.org/cgi-bin/eventbrowser_st_id?ST_ID=R-BTA-6805567
RET signaling	Reactome	R-BTA-8853659	1	22	0.762997	0.794622	GAB1	http://www.reactome.org/cgi-bin/eventbrowser_st_id?ST_ID=R-BTA-8853659
Antifolate resistance	KEGG PATHWAY	bta01523	2	43	0.766423	0.797482	ATIC|CHUK	http://www.genome.jp/kegg-bin/show_pathway?bta01523/bta:281073%09red/bta:506343%09red
Glycine, serine and threonine metabolism	KEGG PATHWAY	bta00260	2	43	0.766423	0.797482	GATM|GCSH	http://www.genome.jp/kegg-bin/show_pathway?bta00260/bta:414732%09red/bta:317723%09red
Mitotic Prophase	Reactome	R-BTA-68875	3	63	0.771792	0.80301	RAB2A|NUP210|CNEP1R1	http://www.reactome.org/cgi-bin/eventbrowser_st_id?ST_ID=R-BTA-68875
African trypanosomiasis	KEGG PATHWAY	bta05143	2	44	0.776977	0.807397	IFNG|GNAQ	http://www.genome.jp/kegg-bin/show_pathway?bta05143/bta:536654%09red/bta:281237%09red
Mismatch repair	KEGG PATHWAY	bta03430	1	23	0.777383	0.807397	MSH6	http://www.genome.jp/kegg-bin/show_pathway?bta03430/bta:540526%09red
Interleukin-3, Interleukin-5 and GM-CSF signaling	Reactome	R-BTA-512988	1	23	0.777383	0.807397	UBA52	http://www.reactome.org/cgi-bin/eventbrowser_st_id?ST_ID=R-BTA-512988
DNA Repair	Reactome	R-BTA-73894	10	190	0.777982	0.80784	KPNA2|TIPIN|SUMO1|TDG|ERCC6|FAN1|UBA52|PPP4R2|POLK|CHEK1	http://www.reactome.org/cgi-bin/eventbrowser_st_id?ST_ID=R-BTA-73894
Mitochondrial translation elongation	Reactome	R-BTA-5389840	3	64	0.780523	0.810121	MRPS14|PTCD3|MRPS10	http://www.reactome.org/cgi-bin/eventbrowser_st_id?ST_ID=R-BTA-5389840
Mitochondrial translation termination	Reactome	R-BTA-5419276	3	64	0.780523	0.810121	MRPS14|PTCD3|MRPS10	http://www.reactome.org/cgi-bin/eventbrowser_st_id?ST_ID=R-BTA-5419276
Ribosome biogenesis in eukaryotes	KEGG PATHWAY	bta03008	4	83	0.780986	0.810542	WDR3|BMS1|NMD3|NXF1	http://www.genome.jp/kegg-bin/show_pathway?bta03008/bta:509871%09red/bta:514870%09red/bta:512136%09red/bta:514945%09red
GPCR downstream signalling	Reactome	R-BTA-388396	28	496	0.78259	0.812146	METAP1|GNRHR|GNAI3|GPR37|PDE1A|NRAS|PTHLH|GNG12|PDE3B|HBEGF|RGS1|GCG|GNB1|GPC1|PRKAR1A|HTR1E|RHOB|RHOA|PDE8A|RGS17|CXCL2|GNAQ|NPY1R|GNG2|PRKACB|F2RL2|PDE4B|NMT2	http://www.reactome.org/cgi-bin/eventbrowser_st_id?ST_ID=R-BTA-388396
Neuroactive ligand-receptor interaction	KEGG PATHWAY	bta04080	20	363	0.786109	0.815618	CNR1|NR3C1|GRIA1|ADCYAP1|GCG|HTR1E|GLRA3|GABRG2|GRIK2|NPY1R|THRB|GLRB|GNRHR|GRM7|HTR2C|GRIA3|F2RL2|GABRB2|GABRB3|GABRA1	http://www.genome.jp/kegg-bin/show_pathway?bta04080/bta:538909%09red/bta:615187%09red/bta:100299449%09red/bta:281946%09red/bta:534626%09red/bta:535362%09red/bta:281198%09red/bta:780973%09red/bta:788329%09red/bta:512581%09red/bta:541160%09red/bta:529593%09
Mitochondrial translation	Reactome	R-BTA-5368287	3	65	0.788976	0.817517	MRPS14|PTCD3|MRPS10	http://www.reactome.org/cgi-bin/eventbrowser_st_id?ST_ID=R-BTA-5368287
Respiratory electron transport, ATP synthesis by chemiosmotic coupling, and heat production by uncoupling proteins.	Reactome	R-BTA-163200	3	65	0.788976	0.817517	NDUFB6|NDUFS2|NDUFA5	http://www.reactome.org/cgi-bin/eventbrowser_st_id?ST_ID=R-BTA-163200
DNA Damage Recognition in GG-NER	Reactome	R-BTA-5696394	1	24	0.790896	0.817517	UBA52	http://www.reactome.org/cgi-bin/eventbrowser_st_id?ST_ID=R-BTA-5696394
Ion homeostasis	Reactome	R-BTA-5578775	1	24	0.790896	0.817517	ATP2A2	http://www.reactome.org/cgi-bin/eventbrowser_st_id?ST_ID=R-BTA-5578775
Amine ligand-binding receptors	Reactome	R-BTA-375280	1	24	0.790896	0.817517	HTR1E	http://www.reactome.org/cgi-bin/eventbrowser_st_id?ST_ID=R-BTA-375280
RMTs methylate histone arginines	Reactome	R-BTA-3214858	1	24	0.790896	0.817517	PRMT6	http://www.reactome.org/cgi-bin/eventbrowser_st_id?ST_ID=R-BTA-3214858
Metabolism of fat-soluble vitamins	Reactome	R-BTA-6806667	1	24	0.790896	0.817517	GPC1	http://www.reactome.org/cgi-bin/eventbrowser_st_id?ST_ID=R-BTA-6806667
Oxidative phosphorylation	KEGG PATHWAY	bta00190	7	140	0.794639	0.821084	NDUFA5|NDUFB6|NDUFS2|ATP6V1G1|ATP6V1C2|SDHD|COX7A2L	http://www.genome.jp/kegg-bin/show_pathway?bta00190/bta:327714%09red/bta:327697%09red/bta:540225%09red/bta:327665%09red/bta:281641%09red/bta:508327%09red/bta:281481%09red
DNA Damage/Telomere Stress Induced Senescence	Reactome	R-BTA-2559586	2	46	0.796836	0.82233	CDKN1B|UBN1	http://www.reactome.org/cgi-bin/eventbrowser_st_id?ST_ID=R-BTA-2559586
Signaling by GPCR	Reactome	R-BTA-372790	28	502	0.801303	0.826344	METAP1|GNRHR|GNAI3|GPR37|PDE1A|NRAS|PTHLH|GNG12|PDE3B|HBEGF|RGS1|GCG|GNB1|GPC1|PRKAR1A|HTR1E|RHOB|RHOA|PDE8A|RGS17|CXCL2|GNAQ|NPY1R|GNG2|PRKACB|F2RL2|PDE4B|NMT2	http://www.reactome.org/cgi-bin/eventbrowser_st_id?ST_ID=R-BTA-372790
Lysosome	KEGG PATHWAY	bta04142	6	123	0.801312	0.826344	LAPTM4A|CTSO|CTSC|LAMP2|AP1S3|CTSV	http://www.genome.jp/kegg-bin/show_pathway?bta04142/bta:352958%09red/bta:540693%09red/bta:281108%09red/bta:404135%09red/bta:616804%09red/bta:529148%09red
The citric acid (TCA) cycle and respiratory electron transport	Reactome	R-BTA-1428517	4	86	0.802832	0.827059	NDUFB6|NDUFA5|PDHA1|NDUFS2	http://www.reactome.org/cgi-bin/eventbrowser_st_id?ST_ID=R-BTA-1428517
Cytosolic DNA-sensing pathway	KEGG PATHWAY	bta04623	3	67	0.805071	0.828402	POLR3E|CHUK|POLR3A	http://www.genome.jp/kegg-bin/show_pathway?bta04623/bta:100140537%09red/bta:281073%09red/bta:540308%09red
Recruitment and ATM-mediated phosphorylation of repair and signaling proteins at DNA double strand breaks	Reactome	R-BTA-5693565	2	47	0.806166	0.828924	SUMO1|UBA52	http://www.reactome.org/cgi-bin/eventbrowser_st_id?ST_ID=R-BTA-5693565
G2/M DNA damage checkpoint	Reactome	R-BTA-69473	2	47	0.806166	0.828924	SUMO1|CHEK1	http://www.reactome.org/cgi-bin/eventbrowser_st_id?ST_ID=R-BTA-69473
Arginine and proline metabolism	KEGG PATHWAY	bta00330	2	48	0.815113	0.836703	P4HA2|GATM	http://www.genome.jp/kegg-bin/show_pathway?bta00330/bta:414732%09red/bta:507327%09red
Fat digestion and absorption	KEGG PATHWAY	bta04975	2	48	0.815113	0.836703	PLPP3|ABCG5	http://www.genome.jp/kegg-bin/show_pathway?bta04975/bta:515536%09red/bta:617707%09red
Metabolism of non-coding RNA	Reactome	R-BTA-194441	1	26	0.815513	0.836703	NUP210	http://www.reactome.org/cgi-bin/eventbrowser_st_id?ST_ID=R-BTA-194441
snRNP Assembly	Reactome	R-BTA-191859	1	26	0.815513	0.836703	NUP210	http://www.reactome.org/cgi-bin/eventbrowser_st_id?ST_ID=R-BTA-191859
Biological oxidations	Reactome	R-BTA-211859	4	90	0.82917	0.848677	CYP26B1|N6AMT1|ADH5|NCOA2	http://www.reactome.org/cgi-bin/eventbrowser_st_id?ST_ID=R-BTA-211859
Phototransduction	KEGG PATHWAY	bta04744	1	28	0.837233	0.855935	GNB1	http://www.genome.jp/kegg-bin/show_pathway?bta04744/bta:281201%09red
Pentose phosphate pathway	KEGG PATHWAY	bta00030	1	28	0.837233	0.855935	PFKM	http://www.genome.jp/kegg-bin/show_pathway?bta00030/bta:506544%09red
Valine, leucine and isoleucine degradation	KEGG PATHWAY	bta00280	2	51	0.839772	0.858469	HMGCS2|HMGCLL1	http://www.genome.jp/kegg-bin/show_pathway?bta00280/bta:503684%09red/bta:535508%09red
RNA Polymerase II Promoter Escape	Reactome	R-BTA-73776	1	29	0.847115	0.864602	GTF2A1	http://www.reactome.org/cgi-bin/eventbrowser_st_id?ST_ID=R-BTA-73776
RNA Polymerase II Transcription Pre-Initiation And Promoter Opening	Reactome	R-BTA-73779	1	29	0.847115	0.864602	GTF2A1	http://www.reactome.org/cgi-bin/eventbrowser_st_id?ST_ID=R-BTA-73779
RNA Polymerase II Transcription Initiation	Reactome	R-BTA-75953	1	29	0.847115	0.864602	GTF2A1	http://www.reactome.org/cgi-bin/eventbrowser_st_id?ST_ID=R-BTA-75953
RNA Polymerase II Transcription Initiation And Promoter Clearance	Reactome	R-BTA-76042	1	29	0.847115	0.864602	GTF2A1	http://www.reactome.org/cgi-bin/eventbrowser_st_id?ST_ID=R-BTA-76042
Antimicrobial peptides	Reactome	R-BTA-6803157	1	29	0.847115	0.864602	ATP7A	http://www.reactome.org/cgi-bin/eventbrowser_st_id?ST_ID=R-BTA-6803157
Senescence-Associated Secretory Phenotype (SASP)	Reactome	R-BTA-2559582	2	53	0.854514	0.871643	CDKN1B|UBA52	http://www.reactome.org/cgi-bin/eventbrowser_st_id?ST_ID=R-BTA-2559582
Glyoxylate and dicarboxylate metabolism	KEGG PATHWAY	bta00630	1	30	0.856397	0.872805	GCSH	http://www.genome.jp/kegg-bin/show_pathway?bta00630/bta:317723%09red
Arachidonic acid metabolism	Reactome	R-BTA-2142753	1	30	0.856397	0.872805	PON2	http://www.reactome.org/cgi-bin/eventbrowser_st_id?ST_ID=R-BTA-2142753
@@Arachidonic acid metabolism	KEGG PATHWAY	bta00590	2	83	0.968369	0.973757	GPX8|GPX7	http://www.genome.jp/kegg-bin/show_pathway?bta00590/bta:523311%09red/bta:511575%09red
Pentose and glucuronate interconversions	KEGG PATHWAY	bta00040	1	31	0.865116	0.880101	KL	http://www.genome.jp/kegg-bin/show_pathway?bta00040/bta:784635%09red
Kinesins	Reactome	R-BTA-983189	1	32	0.873306	0.88696	TUBB2A	http://www.reactome.org/cgi-bin/eventbrowser_st_id?ST_ID=R-BTA-983189
Negative epigenetic regulation of rRNA expression	Reactome	R-BTA-5250941	1	32	0.873306	0.88696	SIRT1	http://www.reactome.org/cgi-bin/eventbrowser_st_id?ST_ID=R-BTA-5250941
SIRT1 negatively regulates rRNA expression	Reactome	R-BTA-427359	1	32	0.873306	0.88696	SIRT1	http://www.reactome.org/cgi-bin/eventbrowser_st_id?ST_ID=R-BTA-427359
Intestinal immune network for IgA production	KEGG PATHWAY	bta04672	2	56	0.874313	0.887856	CD28|AICDA	http://www.genome.jp/kegg-bin/show_pathway?bta04672/bta:539888%09red/bta:281050%09red
Allograft rejection	KEGG PATHWAY	bta05330	2	56	0.874313	0.887856	IFNG|CD28	http://www.genome.jp/kegg-bin/show_pathway?bta05330/bta:281050%09red/bta:281237%09red
Activated PKN1 stimulates transcription of AR (androgen receptor) regulated genes KLK2 and KLK3	Reactome	R-BTA-5625886	1	33	0.880998	0.893936	NCOA2	http://www.reactome.org/cgi-bin/eventbrowser_st_id?ST_ID=R-BTA-5625886
mRNA Splicing - Minor Pathway	Reactome	R-BTA-72165	1	35	0.895012	0.906393	SRSF2	http://www.reactome.org/cgi-bin/eventbrowser_st_id?ST_ID=R-BTA-72165
Glutathione metabolism	KEGG PATHWAY	bta00480	2	60	0.896855	0.907999	GPX8|GPX7	http://www.genome.jp/kegg-bin/show_pathway?bta00480/bta:523311%09red/bta:511575%09red
Glycerophospholipid biosynthesis	Reactome	R-BTA-1483206	2	60	0.896855	0.907999	CPNE3|OSBPL10	http://www.reactome.org/cgi-bin/eventbrowser_st_id?ST_ID=R-BTA-1483206
RNA Polymerase I Promoter Clearance	Reactome	R-BTA-73854	2	60	0.896855	0.907999	TWISTNB|ERCC6	http://www.reactome.org/cgi-bin/eventbrowser_st_id?ST_ID=R-BTA-73854
RNA Polymerase I Transcription	Reactome	R-BTA-73864	2	60	0.896855	0.907999	TWISTNB|ERCC6	http://www.reactome.org/cgi-bin/eventbrowser_st_id?ST_ID=R-BTA-73864
beta-Alanine metabolism	KEGG PATHWAY	bta00410	1	36	0.901387	0.911867	UPB1	http://www.genome.jp/kegg-bin/show_pathway?bta00410/bta:504557%09red
Chromosome Maintenance	Reactome	R-BTA-73886	2	61	0.90187	0.91229	CENPK|HJURP	http://www.reactome.org/cgi-bin/eventbrowser_st_id?ST_ID=R-BTA-73886
Folate biosynthesis	KEGG PATHWAY	bta00790	1	37	0.907376	0.91707	PAH	http://www.genome.jp/kegg-bin/show_pathway?bta00790/bta:510583%09red
Base-Excision Repair, AP Site Formation	Reactome	R-BTA-73929	1	37	0.907376	0.91707	TDG	http://www.reactome.org/cgi-bin/eventbrowser_st_id?ST_ID=R-BTA-73929
Drug metabolism - cytochrome P450	KEGG PATHWAY	bta00982	2	63	0.911225	0.920761	FMO2|ADH5	http://www.genome.jp/kegg-bin/show_pathway?bta00982/bta:505515%09red/bta:504401%09red
Retinol metabolism	KEGG PATHWAY	bta00830	2	64	0.915582	0.924435	CYP26B1|ADH5	http://www.genome.jp/kegg-bin/show_pathway?bta00830/bta:505515%09red/bta:540868%09red
Tyrosine metabolism	KEGG PATHWAY	bta00350	1	39	0.918284	0.927031	ADH5	http://www.genome.jp/kegg-bin/show_pathway?bta00350/bta:505515%09red
PRC2 methylates histones and DNA	Reactome	R-BTA-212300	1	39	0.918284	0.927031	MTF2	http://www.reactome.org/cgi-bin/eventbrowser_st_id?ST_ID=R-BTA-212300
Porphyrin and chlorophyll metabolism	KEGG PATHWAY	bta00860	1	40	0.923247	0.931641	CPOX	http://www.genome.jp/kegg-bin/show_pathway?bta00860/bta:540283%09red
Nonhomologous End-Joining (NHEJ)	Reactome	R-BTA-5693571	1	40	0.923247	0.931641	SUMO1	http://www.reactome.org/cgi-bin/eventbrowser_st_id?ST_ID=R-BTA-5693571
GPCR ligand binding	Reactome	R-BTA-500792	9	212	0.924535	0.932874	HTR1E|GCG|NPY1R|GNB1|PTHLH|GNG12|GNRHR|F2RL2|GNG2	http://www.reactome.org/cgi-bin/eventbrowser_st_id?ST_ID=R-BTA-500792
Metabolism of xenobiotics by cytochrome P450	KEGG PATHWAY	bta00980	2	67	0.927477	0.935642	ADH5|SULT2A1	http://www.genome.jp/kegg-bin/show_pathway?bta00980/bta:505515%09red/bta:533560%09red
Biosynthesis of amino acids	KEGG PATHWAY	bta01230	2	73	0.946677	0.953372	PAH|PFKM	http://www.genome.jp/kegg-bin/show_pathway?bta01230/bta:506544%09red/bta:510583%09red
Alcoholism	KEGG PATHWAY	bta05034	9	224	0.947853	0.954489	NRAS|GNB1|GNG12|MAPK1|GNG2|CREB1|BDNF|GNAI3|ATF2	http://www.genome.jp/kegg-bin/show_pathway?bta05034/bta:506322%09red/bta:281713%09red/bta:509827%09red/bta:286850%09red/bta:281203%09red/bta:281201%09red/bta:539521%09red/bta:617701%09red/bta:327672%09red
Drug metabolism - other enzymes	KEGG PATHWAY	bta00983	2	76	0.954355	0.960693	UPB1|CMPK1	http://www.genome.jp/kegg-bin/show_pathway?bta00983/bta:509965%09red/bta:504557%09red
Phase II - Conjugation of compounds	Reactome	R-BTA-156580	1	49	0.956333	0.962341	N6AMT1	http://www.reactome.org/cgi-bin/eventbrowser_st_id?ST_ID=R-BTA-156580
Chemical carcinogenesis	KEGG PATHWAY	bta05204	2	77	0.95667	0.962612	ADH5|SULT2A1	http://www.genome.jp/kegg-bin/show_pathway?bta05204/bta:505515%09red/bta:533560%09red
RNA Polymerase I Promoter Escape	Reactome	R-BTA-73772	1	52	0.963818	0.969596	TWISTNB	http://www.reactome.org/cgi-bin/eventbrowser_st_id?ST_ID=R-BTA-73772
G alpha (s) signalling events	Reactome	R-BTA-418555	8	219	0.968536	0.973856	GCG|PDE1A|GNB1|PTHLH|GNG12|PDE3B|GNG2|PDE8A	http://www.reactome.org/cgi-bin/eventbrowser_st_id?ST_ID=R-BTA-418555
Peptide ligand-binding receptors	Reactome	R-BTA-375276	2	87	0.974408	0.97955	F2RL2|NPY1R	http://www.reactome.org/cgi-bin/eventbrowser_st_id?ST_ID=R-BTA-375276
Nonsense-Mediated Decay (NMD)	Reactome	R-BTA-927802	2	91	0.979324	0.983651	UBA52|SMG1	http://www.reactome.org/cgi-bin/eventbrowser_st_id?ST_ID=R-BTA-927802
Nonsense Mediated Decay (NMD) enhanced by the Exon Junction Complex (EJC)	Reactome	R-BTA-975957	2	91	0.979324	0.983651	UBA52|SMG1	http://www.reactome.org/cgi-bin/eventbrowser_st_id?ST_ID=R-BTA-975957
Translation	Reactome	R-BTA-72766	5	169	0.982499	0.986488	N6AMT1|UBA52|MRPS14|PTCD3|MRPS10	http://www.reactome.org/cgi-bin/eventbrowser_st_id?ST_ID=R-BTA-72766
Aminoacyl-tRNA biosynthesis	KEGG PATHWAY	bta00970	1	66	0.984959	0.988043	IARS2	http://www.genome.jp/kegg-bin/show_pathway?bta00970/bta:533057%09red
Autoimmune thyroid disease	KEGG PATHWAY	bta05320	1	71	0.989008	0.991328	CD28	http://www.genome.jp/kegg-bin/show_pathway?bta05320/bta:281050%09red
GTP hydrolysis and joining of the 60S ribosomal subunit	Reactome	R-BTA-72706	1	73	0.990304	0.992557	UBA52	http://www.reactome.org/cgi-bin/eventbrowser_st_id?ST_ID=R-BTA-72706
Ribosome	KEGG PATHWAY	bta03010	4	160	0.990988	0.99303	MRPS6|UBA52|MRPS14|MRPS10	http://www.genome.jp/kegg-bin/show_pathway?bta03010/bta:445421%09red/bta:615199%09red/bta:615431%09red/bta:515885%09red
Nonsense Mediated Decay (NMD) independent of the Exon Junction Complex (EJC)	Reactome	R-BTA-975956	1	78	0.992914	0.994749	UBA52	http://www.reactome.org/cgi-bin/eventbrowser_st_id?ST_ID=R-BTA-975956
SRP-dependent cotranslational protein targeting to membrane	Reactome	R-BTA-1799339	1	79	0.993345	0.99511	UBA52	http://www.reactome.org/cgi-bin/eventbrowser_st_id?ST_ID=R-BTA-1799339
Class A/1 (Rhodopsin-like receptors)	Reactome	R-BTA-373076	4	168	0.993795	0.995489	F2RL2|NPY1R|GNRHR|HTR1E	http://www.reactome.org/cgi-bin/eventbrowser_st_id?ST_ID=R-BTA-373076
Formation of a pool of free 40S subunits	Reactome	R-BTA-72689	1	83	0.994822	0.996306	UBA52	http://www.reactome.org/cgi-bin/eventbrowser_st_id?ST_ID=R-BTA-72689
Complement and coagulation cascades	KEGG PATHWAY	bta04610	1	87	0.995972	0.997103	F2RL2	http://www.genome.jp/kegg-bin/show_pathway?bta04610/bta:512581%09red
L13a-mediated translational silencing of Ceruloplasmin expression	Reactome	R-BTA-156827	1	89	0.996447	0.997508	UBA52	http://www.reactome.org/cgi-bin/eventbrowser_st_id?ST_ID=R-BTA-156827
Eukaryotic Translation Initiation	Reactome	R-BTA-72613	1	90	0.996663	0.997583	UBA52	http://www.reactome.org/cgi-bin/eventbrowser_st_id?ST_ID=R-BTA-72613
Cap-dependent Translation Initiation	Reactome	R-BTA-72737	1	90	0.996663	0.997583	UBA52	http://www.reactome.org/cgi-bin/eventbrowser_st_id?ST_ID=R-BTA-72737
Systemic lupus erythematosus	KEGG PATHWAY	bta05322	4	182	0.996811	0.997661	SNRPB|IFNG|ACTN1|CD28	http://www.genome.jp/kegg-bin/show_pathway?bta05322/bta:281237%09red/bta:281050%09red/bta:613304%09red/bta:524770%09red
Olfactory Signaling Pathway	Reactome	R-BTA-381753	1	149	0.999918	1	GNB1	http://www.reactome.org/cgi-bin/eventbrowser_st_id?ST_ID=R-BTA-381753
Olfactory transduction	KEGG PATHWAY	bta04740	5	1161	1	1	SLC8A1|PRKG1|PDE1A|GNB1|PRKACB	http://www.genome.jp/kegg-bin/show_pathway?bta04740/bta:337925%09red/bta:282004%09red/bta:282323%09red/bta:281201%09red/bta:281969%09red
--------------------
#Term	Database	ID	Input number	Background number	P-Value	Corrected P-Value	Input	Hyperlink
--------------------
#Term	Database	ID	Input number	Background number	P-Value	Corrected P-Value	Input	Hyperlink
binding	Gene Ontology Slim	GO:0005488	746	6284	9.98813e-66	7.03963e-62	HIF3A|ERRFI1|AGL|PPP3R1|HSPA4|SUMO1|SCG2|IL6ST|P4HA2|HIPK1|SRSF10|IFNW1|CYP26B1|LHX2|OTUD7B|SMG1|CDC73|RNF13|COMMD7|ZNF704|NAPG|N6AMT1|SPTLC2|NAPB|SPTLC1|IRX5|WEE1|HBS1L|PCDH11X|IGF1R|KMT5A|WDR3|CAPZA2|WIPI2|SP1|CPE|DYM|STK3|STK4|OSBPL3|RIC1|PRRG4|UBE4B|S	http://amigo.geneontology.org/amigo/term/GO:0005488
binding	Gene Ontology	GO:0005488	746	6284	9.98813e-66	7.03963e-62	HIF3A|ERRFI1|AGL|PPP3R1|HSPA4|SUMO1|SCG2|IL6ST|P4HA2|HIPK1|SRSF10|IFNW1|CYP26B1|LHX2|OTUD7B|SMG1|CDC73|RNF13|COMMD7|ZNF704|NAPG|N6AMT1|SPTLC2|NAPB|SPTLC1|IRX5|WEE1|HBS1L|PCDH11X|IGF1R|KMT5A|WDR3|CAPZA2|WIPI2|SP1|CPE|DYM|STK3|STK4|OSBPL3|RIC1|PRRG4|UBE4B|S	http://amigo.geneontology.org/amigo/term/GO:0005488
cellular process	Gene Ontology Slim	GO:0009987	888	8219	4.48515e-64	1.58057e-60	UBE2Q1|ERRFI1|PGAP2|HSPA4|SUMO1|SCG2|IL6ST|P4HA2|HIPK1|FZD5|GPM6A|SRSF10|GPM6B|IFNW1|CYP26B1|LHX2|OTUD7B|SMG1|CDC73|GPR180|RNF13|CDC42SE2|ZNF706|NAPG|N6AMT1|SPTLC2|PCGF3|SPTLC1|IRX5|NAA30|WEE1|HBS1L|SLITRK6|IGF1R|SLITRK2|CAPZA2|WIPI2|SP1|MDFIC|LRRTM2|CPE|	http://amigo.geneontology.org/amigo/term/GO:0009987
cellular process	Gene Ontology	GO:0009987	888	8219	4.48515e-64	1.58057e-60	UBE2Q1|ERRFI1|PGAP2|HSPA4|SUMO1|SCG2|IL6ST|P4HA2|HIPK1|FZD5|GPM6A|SRSF10|GPM6B|IFNW1|CYP26B1|LHX2|OTUD7B|SMG1|CDC73|GPR180|RNF13|CDC42SE2|ZNF706|NAPG|N6AMT1|SPTLC2|PCGF3|SPTLC1|IRX5|NAA30|WEE1|HBS1L|SLITRK6|IGF1R|SLITRK2|CAPZA2|WIPI2|SP1|MDFIC|LRRTM2|CPE|	http://amigo.geneontology.org/amigo/term/GO:0009987
intracellular	Gene Ontology Slim	GO:0005622	810	7359	2.22426e-59	5.22554e-56	HIF3A|ERRFI1|PGAP2|PPP3R1|HSPA4|SUMO1|TMCO1|FAM222B|SCG2|RIC1|P4HA2|HIPK1|AGL|SRSF10|LHX2|OTUD7B|SMG1|CDC73|RNF13|CDC42SE2|ZNF706|NAPG|GRWD1|SPTLC2|NAPB|IRX5|WEE1|HBS1L|PPHLN1|IGF1R|WDR3|CAPZA2|WIPI2|SP1|MDFIC|CPE|CRMP1|STK3|STK4|SMARCD1|OSBPL3|UBE4B|STRB	http://amigo.geneontology.org/amigo/term/GO:0005622
intracellular	Gene Ontology	GO:0005622	810	7359	2.22426e-59	5.22554e-56	HIF3A|ERRFI1|PGAP2|PPP3R1|HSPA4|SUMO1|TMCO1|FAM222B|SCG2|RIC1|P4HA2|HIPK1|AGL|SRSF10|LHX2|OTUD7B|SMG1|CDC73|RNF13|CDC42SE2|ZNF706|NAPG|GRWD1|SPTLC2|NAPB|IRX5|WEE1|HBS1L|PPHLN1|IGF1R|WDR3|CAPZA2|WIPI2|SP1|MDFIC|CPE|CRMP1|STK3|STK4|SMARCD1|OSBPL3|UBE4B|STRB	http://amigo.geneontology.org/amigo/term/GO:0005622
cellular anatomical entity	Gene Ontology Slim	GO:0110165	994	9929	6.16511e-59	1.08629e-55	PGAP1|ERRFI1|PGAP2|PPP3R1|HSPA4|SUMO1|TMCO1|FAM222B|SCG2|IL6ST|P4HA2|HIPK1|FZD5|GPM6A|SRSF10|GPM6B|FAM155A|IFNW1|CYP26B1|LHX2|OTUD7B|SMG1|CDC73|GPR180|SLC28A3|RNF13|CDC42SE2|ZNF706|NAPG|GRWD1|SPTLC2|PCGF3|SPTLC1|IRX5|NAA30|WEE1|SLITRK6|PPHLN1|IGF1R|KMT5A|	http://amigo.geneontology.org/amigo/term/GO:0110165
cellular anatomical entity	Gene Ontology	GO:0110165	994	9929	6.16511e-59	1.08629e-55	PGAP1|ERRFI1|PGAP2|PPP3R1|HSPA4|SUMO1|TMCO1|FAM222B|SCG2|IL6ST|P4HA2|HIPK1|FZD5|GPM6A|SRSF10|GPM6B|FAM155A|IFNW1|CYP26B1|LHX2|OTUD7B|SMG1|CDC73|GPR180|SLC28A3|RNF13|CDC42SE2|ZNF706|NAPG|GRWD1|SPTLC2|PCGF3|SPTLC1|IRX5|NAA30|WEE1|SLITRK6|PPHLN1|IGF1R|KMT5A|	http://amigo.geneontology.org/amigo/term/GO:0110165
biological regulation	Gene Ontology Slim	GO:0065007	689	5876	3.2226e-57	4.54258e-54	UBE2Q1|ERRFI1|PGAP2|SUMO1|SCG2|IL6ST|FKBP4|HIPK1|GPM6A|SRSF10|GPM6B|IFNW1|CYP26B1|LHX2|OTUD7B|SMG1|CDC73|GPR180|CDC42SE2|ZNF706|NAPB|SPTLC1|IRX5|HBS1L|SLITRK6|IGF1R|SLITRK2|CAPZA2|IFNG|SP1|MDFIC|CPE|STK3|STK4|RIC1|UBE4B|AKAP1|HCN1|CCND2|BAK1|CEP76|ANGPTL1	http://amigo.geneontology.org/amigo/term/GO:0065007
biological regulation	Gene Ontology	GO:0065007	689	5876	3.2226e-57	4.54258e-54	UBE2Q1|ERRFI1|PGAP2|SUMO1|SCG2|IL6ST|FKBP4|HIPK1|GPM6A|SRSF10|GPM6B|IFNW1|CYP26B1|LHX2|OTUD7B|SMG1|CDC73|GPR180|CDC42SE2|ZNF706|NAPB|SPTLC1|IRX5|HBS1L|SLITRK6|IGF1R|SLITRK2|CAPZA2|IFNG|SP1|MDFIC|CPE|STK3|STK4|RIC1|UBE4B|AKAP1|HCN1|CCND2|BAK1|CEP76|ANGPTL1	http://amigo.geneontology.org/amigo/term/GO:0065007
regulation of biological process	Gene Ontology Slim	GO:0050789	655	5482	2.24008e-56	2.63135e-53	HIF3A|ERRFI1|PGAP2|SUMO1|SCG2|IL6ST|FKBP4|HIPK1|GPM6A|SRSF10|GPM6B|IFNW1|RAB11A|LHX2|OTUD7B|SMG1|CDC73|GPR180|CDC42SE2|ZNF706|NAPB|SPTLC1|IRX5|HBS1L|SLITRK6|IGF1R|SLITRK2|ZMYM5|IFNG|SP1|MDFIC|CPE|STK3|STK4|RIC1|UBE4B|AKAP1|CCND2|BAK1|CEP76|ANGPTL1|MAF|ATM	http://amigo.geneontology.org/amigo/term/GO:0050789
regulation of biological process	Gene Ontology	GO:0050789	655	5482	2.24008e-56	2.63135e-53	HIF3A|ERRFI1|PGAP2|SUMO1|SCG2|IL6ST|FKBP4|HIPK1|GPM6A|SRSF10|GPM6B|IFNW1|RAB11A|LHX2|OTUD7B|SMG1|CDC73|GPR180|CDC42SE2|ZNF706|NAPB|SPTLC1|IRX5|HBS1L|SLITRK6|IGF1R|SLITRK2|ZMYM5|IFNG|SP1|MDFIC|CPE|STK3|STK4|RIC1|UBE4B|AKAP1|CCND2|BAK1|CEP76|ANGPTL1|MAF|ATM	http://amigo.geneontology.org/amigo/term/GO:0050789
organelle	Gene Ontology Slim	GO:0043226	749	6793	1.51317e-53	1.52355e-50	HIF3A|HSPA2|PGAP2|HSPA4|SUMO1|TMCO1|FAM222B|SCG2|IL6ST|P4HA2|HIPK1|FZD5|SRSF10|CYP26B1|LHX2|OTUD7B|SMG1|CDC73|GPR180|RNF13|CDC42SE2|ZNF706|NAPG|GRWD1|SPTLC2|NAPB|SPTLC1|IRX5|WEE1|PPHLN1|WDR3|CAPZA2|WIPI2|SP1|MDFIC|CPE|STK4|SMARCD1|OSBPL3|RIC1|UBE4B|STRBP|	http://amigo.geneontology.org/amigo/term/GO:0043226
organelle	Gene Ontology	GO:0043226	749	6793	1.51317e-53	1.52355e-50	HIF3A|HSPA2|PGAP2|HSPA4|SUMO1|TMCO1|FAM222B|SCG2|IL6ST|P4HA2|HIPK1|FZD5|SRSF10|CYP26B1|LHX2|OTUD7B|SMG1|CDC73|GPR180|RNF13|CDC42SE2|ZNF706|NAPG|GRWD1|SPTLC2|NAPB|SPTLC1|IRX5|WEE1|PPHLN1|WDR3|CAPZA2|WIPI2|SP1|MDFIC|CPE|STK4|SMARCD1|OSBPL3|RIC1|UBE4B|STRBP|	http://amigo.geneontology.org/amigo/term/GO:0043226
regulation of cellular process	Gene Ontology Slim	GO:0050794	620	5173	5.00884e-53	4.41279e-50	HIF3A|ERRFI1|PGAP2|SUMO1|SCG2|IL6ST|FKBP4|HIPK1|GPM6A|SRSF10|GPM6B|IFNW1|RAB11A|LHX2|OTUD7B|CDC73|GPR180|CDC42SE2|ZNF706|NAPB|SPTLC1|IRX5|HBS1L|SLITRK6|IGF1R|SLITRK2|ZMYM5|IFNG|SP1|MDFIC|CPE|STK3|STK4|RIC1|UBE4B|AKAP1|CCND2|BAK1|CEP76|ANGPTL1|MAF|ATMIN|CS	http://amigo.geneontology.org/amigo/term/GO:0050794
regulation of cellular process	Gene Ontology	GO:0050794	620	5173	5.00884e-53	4.41279e-50	HIF3A|ERRFI1|PGAP2|SUMO1|SCG2|IL6ST|FKBP4|HIPK1|GPM6A|SRSF10|GPM6B|IFNW1|RAB11A|LHX2|OTUD7B|CDC73|GPR180|CDC42SE2|ZNF706|NAPB|SPTLC1|IRX5|HBS1L|SLITRK6|IGF1R|SLITRK2|ZMYM5|IFNG|SP1|MDFIC|CPE|STK3|STK4|RIC1|UBE4B|AKAP1|CCND2|BAK1|CEP76|ANGPTL1|MAF|ATMIN|CS	http://amigo.geneontology.org/amigo/term/GO:0050794
membrane-bounded organelle	Gene Ontology Slim	GO:0043227	698	6259	2.00857e-50	1.57293e-47	HIF3A|PGAP2|HSPA4|SUMO1|TMCO1|FAM222B|SCG2|IL6ST|P4HA2|HIPK1|FZD5|SRSF10|CYP26B1|LHX2|OTUD7B|SMG1|CDC73|GPR180|RNF13|CDC42SE2|ZNF706|NAPG|GRWD1|SPTLC2|NAPB|SPTLC1|IRX5|WEE1|PPHLN1|WDR3|CAPZA2|WIPI2|SP1|MDFIC|CPE|STK4|SMARCD1|OSBPL3|RIC1|UBE4B|STRBP|AKAP7|	http://amigo.geneontology.org/amigo/term/GO:0043227
membrane-bounded organelle	Gene Ontology	GO:0043227	698	6259	2.00857e-50	1.57293e-47	HIF3A|PGAP2|HSPA4|SUMO1|TMCO1|FAM222B|SCG2|IL6ST|P4HA2|HIPK1|FZD5|SRSF10|CYP26B1|LHX2|OTUD7B|SMG1|CDC73|GPR180|RNF13|CDC42SE2|ZNF706|NAPG|GRWD1|SPTLC2|NAPB|SPTLC1|IRX5|WEE1|PPHLN1|WDR3|CAPZA2|WIPI2|SP1|MDFIC|CPE|STK4|SMARCD1|OSBPL3|RIC1|UBE4B|STRBP|AKAP7|	http://amigo.geneontology.org/amigo/term/GO:0043227
intracellular organelle	Gene Ontology Slim	GO:0043229	682	6083	1.06799e-49	7.52723e-47	HIF3A|HSPA2|PGAP2|RNF13|SUMO1|TMCO1|FAM222B|SCG2|RIC1|P4HA2|HIPK1|AGL|SRSF10|LHX2|OTUD7B|SMG1|CDC73|CDC42SE2|ZNF706|NAPG|GRWD1|SPTLC2|NAPB|IRX5|WEE1|PPHLN1|WDR3|CAPZA2|WIPI2|SP1|MDFIC|CPE|STK4|SMARCD1|OSBPL3|UBE4B|STRBP|AKAP7|AKAP1|CCND2|SYAP1|ATF7IP2|BAK	http://amigo.geneontology.org/amigo/term/GO:0043229
intracellular organelle	Gene Ontology	GO:0043229	682	6083	1.06799e-49	7.52723e-47	HIF3A|HSPA2|PGAP2|RNF13|SUMO1|TMCO1|FAM222B|SCG2|RIC1|P4HA2|HIPK1|AGL|SRSF10|LHX2|OTUD7B|SMG1|CDC73|CDC42SE2|ZNF706|NAPG|GRWD1|SPTLC2|NAPB|IRX5|WEE1|PPHLN1|WDR3|CAPZA2|WIPI2|SP1|MDFIC|CPE|STK4|SMARCD1|OSBPL3|UBE4B|STRBP|AKAP7|AKAP1|CCND2|SYAP1|ATF7IP2|BAK	http://amigo.geneontology.org/amigo/term/GO:0043229
macromolecule metabolic process	Gene Ontology Slim	GO:0043170	567	4660	2.13134e-49	1.36561e-46	UBE2Q1|ERRFI1|PGAP2|RNF13|SUMO1|SCG2|IL6ST|P4HA2|HIPK1|FZD5|SRSF10|IFNW1|LHX2|OTUD7B|SMG1|CDC73|ZNF706|N6AMT1|PCGF3|IRX5|WEE1|HBS1L|IGF1R|WDR3|ZMYM5|WIPI2|SP1|MDFIC|CPE|STK3|STK4|RIC1|UBE4B|CCND2|ERI2|BAK1|MAF|ATMIN|CSRP3|STK38L|YBX3|IL7R|TNFSF11|ACTA1|EL	http://amigo.geneontology.org/amigo/term/GO:0043170
macromolecule metabolic process	Gene Ontology	GO:0043170	567	4660	2.13134e-49	1.36561e-46	UBE2Q1|ERRFI1|PGAP2|RNF13|SUMO1|SCG2|IL6ST|P4HA2|HIPK1|FZD5|SRSF10|IFNW1|LHX2|OTUD7B|SMG1|CDC73|ZNF706|N6AMT1|PCGF3|IRX5|WEE1|HBS1L|IGF1R|WDR3|ZMYM5|WIPI2|SP1|MDFIC|CPE|STK3|STK4|RIC1|UBE4B|CCND2|ERI2|BAK1|MAF|ATMIN|CSRP3|STK38L|YBX3|IL7R|TNFSF11|ACTA1|EL	http://amigo.geneontology.org/amigo/term/GO:0043170
organic substance metabolic process	Gene Ontology Slim	GO:0071704	634	5549	8.1248e-48	4.77197e-45	UBE2Q1|ERRFI1|PGAP2|RNF13|SUMO1|SCG2|IL6ST|P4HA2|HIPK1|FZD5|SRSF10|IFNW1|LHX2|OTUD7B|SMG1|CDC73|ZNF706|N6AMT1|SPTLC2|PCGF3|SPTLC1|IRX5|WEE1|HBS1L|IGF1R|WDR3|ZMYM5|WIPI2|SP1|MDFIC|CPE|STK3|STK4|RIC1|UBE4B|CCND2|ERI2|BAK1|MAF|ATMIN|CSRP3|FDX1|IP6K1|STK38L|Y	http://amigo.geneontology.org/amigo/term/GO:0071704
organic substance metabolic process	Gene Ontology	GO:0071704	634	5549	8.1248e-48	4.77197e-45	UBE2Q1|ERRFI1|PGAP2|RNF13|SUMO1|SCG2|IL6ST|P4HA2|HIPK1|FZD5|SRSF10|IFNW1|LHX2|OTUD7B|SMG1|CDC73|ZNF706|N6AMT1|SPTLC2|PCGF3|SPTLC1|IRX5|WEE1|HBS1L|IGF1R|WDR3|ZMYM5|WIPI2|SP1|MDFIC|CPE|STK3|STK4|RIC1|UBE4B|CCND2|ERI2|BAK1|MAF|ATMIN|CSRP3|FDX1|IP6K1|STK38L|Y	http://amigo.geneontology.org/amigo/term/GO:0071704
metabolic process	Gene Ontology Slim	GO:0008152	669	6048	1.52253e-46	8.25445e-44	UBE2Q1|ERRFI1|PGAP2|RNF13|SUMO1|SCG2|IL6ST|P4HA2|HIPK1|FZD5|SRSF10|IFNW1|LHX2|OTUD7B|SMG1|CDC73|ZNF706|N6AMT1|SPTLC2|PCGF3|SPTLC1|IRX5|WEE1|HBS1L|IGF1R|WDR3|ZMYM5|WIPI2|SP1|MDFIC|CPE|STK3|STK4|RIC1|UBE4B|CCND2|ERI2|BAK1|MAF|ATMIN|CSRP3|FDX1|IP6K1|STK38L|Y	http://amigo.geneontology.org/amigo/term/GO:0008152
metabolic process	Gene Ontology	GO:0008152	669	6048	1.52253e-46	8.25445e-44	UBE2Q1|ERRFI1|PGAP2|RNF13|SUMO1|SCG2|IL6ST|P4HA2|HIPK1|FZD5|SRSF10|IFNW1|LHX2|OTUD7B|SMG1|CDC73|ZNF706|N6AMT1|SPTLC2|PCGF3|SPTLC1|IRX5|WEE1|HBS1L|IGF1R|WDR3|ZMYM5|WIPI2|SP1|MDFIC|CPE|STK3|STK4|RIC1|UBE4B|CCND2|ERI2|BAK1|MAF|ATMIN|CSRP3|FDX1|IP6K1|STK38L|Y	http://amigo.geneontology.org/amigo/term/GO:0008152
primary metabolic process	Gene Ontology Slim	GO:0044238	610	5321	5.39982e-46	2.71842e-43	UBE2Q1|ERRFI1|PGAP2|RNF13|SUMO1|SCG2|IL6ST|P4HA2|HIPK1|FZD5|SRSF10|IFNW1|LHX2|OTUD7B|SMG1|CDC73|ZNF706|N6AMT1|SPTLC2|PCGF3|SPTLC1|IRX5|WEE1|HBS1L|IGF1R|WDR3|ZMYM5|WIPI2|SP1|MDFIC|CPE|STK3|STK4|RIC1|UBE4B|CCND2|ERI2|BAK1|MAF|ATMIN|CSRP3|FDX1|IP6K1|STK38L|Y	http://amigo.geneontology.org/amigo/term/GO:0044238
primary metabolic process	Gene Ontology	GO:0044238	610	5321	5.39982e-46	2.71842e-43	UBE2Q1|ERRFI1|PGAP2|RNF13|SUMO1|SCG2|IL6ST|P4HA2|HIPK1|FZD5|SRSF10|IFNW1|LHX2|OTUD7B|SMG1|CDC73|ZNF706|N6AMT1|SPTLC2|PCGF3|SPTLC1|IRX5|WEE1|HBS1L|IGF1R|WDR3|ZMYM5|WIPI2|SP1|MDFIC|CPE|STK3|STK4|RIC1|UBE4B|CCND2|ERI2|BAK1|MAF|ATMIN|CSRP3|FDX1|IP6K1|STK38L|Y	http://amigo.geneontology.org/amigo/term/GO:0044238
cellular metabolic process	Gene Ontology Slim	GO:0044237	619	5446	1.05488e-45	4.95653e-43	UBE2Q1|ERRFI1|PGAP2|RNF13|SUMO1|SCG2|IL6ST|P4HA2|HIPK1|FZD5|SRSF10|IFNW1|LHX2|OTUD7B|SMG1|CDC73|ZNF706|N6AMT1|SPTLC2|PCGF3|SPTLC1|IRX5|NAA30|ABCD3|HBS1L|IGF1R|WDR3|ZMYM5|WIPI2|SP1|MDFIC|CPE|STK3|STK4|RIC1|UBE4B|CCND2|ERI2|BAK1|MAF|ATMIN|CSRP3|FDX1|IP6K1|S	http://amigo.geneontology.org/amigo/term/GO:0044237
cellular metabolic process	Gene Ontology	GO:0044237	619	5446	1.05488e-45	4.95653e-43	UBE2Q1|ERRFI1|PGAP2|RNF13|SUMO1|SCG2|IL6ST|P4HA2|HIPK1|FZD5|SRSF10|IFNW1|LHX2|OTUD7B|SMG1|CDC73|ZNF706|N6AMT1|SPTLC2|PCGF3|SPTLC1|IRX5|NAA30|ABCD3|HBS1L|IGF1R|WDR3|ZMYM5|WIPI2|SP1|MDFIC|CPE|STK3|STK4|RIC1|UBE4B|CCND2|ERI2|BAK1|MAF|ATMIN|CSRP3|FDX1|IP6K1|S	http://amigo.geneontology.org/amigo/term/GO:0044237
cellular macromolecule metabolic process	Gene Ontology Slim	GO:0044260	503	4031	1.22429e-45	5.39298e-43	UBE2Q1|ERRFI1|PGAP2|RNF13|SUMO1|SCG2|IL6ST|P4HA2|HIPK1|AGL|IFNW1|LHX2|OTUD7B|SMG1|CDC73|ZNF706|N6AMT1|IRX5|WEE1|HBS1L|IGF1R|ZMYM5|WIPI2|SP1|MDFIC|STK3|STK4|RIC1|UBE4B|CCND2|BAK1|MAF|ATMIN|CSRP3|STK38L|YBX3|TNFSF11|ELAVL1|ACVR1C|CDKN1B|LSM14A|CAPRIN1|UBE2D	http://amigo.geneontology.org/amigo/term/GO:0044260
cellular macromolecule metabolic process	Gene Ontology	GO:0044260	503	4031	1.22429e-45	5.39298e-43	UBE2Q1|ERRFI1|PGAP2|RNF13|SUMO1|SCG2|IL6ST|P4HA2|HIPK1|AGL|IFNW1|LHX2|OTUD7B|SMG1|CDC73|ZNF706|N6AMT1|IRX5|WEE1|HBS1L|IGF1R|ZMYM5|WIPI2|SP1|MDFIC|STK3|STK4|RIC1|UBE4B|CCND2|BAK1|MAF|ATMIN|CSRP3|STK38L|YBX3|TNFSF11|ELAVL1|ACVR1C|CDKN1B|LSM14A|CAPRIN1|UBE2D	http://amigo.geneontology.org/amigo/term/GO:0044260
nitrogen compound metabolic process	Gene Ontology Slim	GO:0006807	582	4993	1.78081e-45	7.38304e-43	UBE2Q1|ERRFI1|PGAP2|RNF13|SUMO1|SCG2|RIC1|P4HA2|HIPK1|FZD5|SRSF10|IFNW1|LHX2|OTUD7B|SMG1|CDC73|ZNF706|N6AMT1|SPTLC2|PCGF3|SPTLC1|IRX5|WEE1|HBS1L|IGF1R|WDR3|ZMYM5|WIPI2|SP1|MDFIC|CPE|STK3|STK4|UBE4B|CCND2|ERI2|BAK1|MAF|ATMIN|CSRP3|STK38L|YBX3|TNFSF11|ELAVL	http://amigo.geneontology.org/amigo/term/GO:0006807
nitrogen compound metabolic process	Gene Ontology	GO:0006807	582	4993	1.78081e-45	7.38304e-43	UBE2Q1|ERRFI1|PGAP2|RNF13|SUMO1|SCG2|RIC1|P4HA2|HIPK1|FZD5|SRSF10|IFNW1|LHX2|OTUD7B|SMG1|CDC73|ZNF706|N6AMT1|SPTLC2|PCGF3|SPTLC1|IRX5|WEE1|HBS1L|IGF1R|WDR3|ZMYM5|WIPI2|SP1|MDFIC|CPE|STK3|STK4|UBE4B|CCND2|ERI2|BAK1|MAF|ATMIN|CSRP3|STK38L|YBX3|TNFSF11|ELAVL	http://amigo.geneontology.org/amigo/term/GO:0006807
intracellular membrane-bounded organelle	Gene Ontology Slim	GO:0043231	591	5183	1.51145e-43	5.91818e-41	HIF3A|PGAP2|RNF13|SUMO1|TMCO1|FAM222B|CPE|RIC1|P4HA2|HIPK1|AGL|SRSF10|LHX2|OTUD7B|SMG1|CDC73|ZNF706|NAPG|GRWD1|SPTLC2|NAPB|IRX5|WEE1|PPHLN1|WDR3|ZMYM5|WIPI2|SP1|MDFIC|STK4|SMARCD1|OSBPL3|UBE4B|STRBP|AKAP7|AKAP1|CCND2|SYAP1|ATF7IP2|BAK1|MAF|ATMIN|CSRP3|FDX	http://amigo.geneontology.org/amigo/term/GO:0043231
intracellular membrane-bounded organelle	Gene Ontology	GO:0043231	591	5183	1.51145e-43	5.91818e-41	HIF3A|PGAP2|RNF13|SUMO1|TMCO1|FAM222B|CPE|RIC1|P4HA2|HIPK1|AGL|SRSF10|LHX2|OTUD7B|SMG1|CDC73|ZNF706|NAPG|GRWD1|SPTLC2|NAPB|IRX5|WEE1|PPHLN1|WDR3|ZMYM5|WIPI2|SP1|MDFIC|STK4|SMARCD1|OSBPL3|UBE4B|STRBP|AKAP7|AKAP1|CCND2|SYAP1|ATF7IP2|BAK1|MAF|ATMIN|CSRP3|FDX	http://amigo.geneontology.org/amigo/term/GO:0043231
developmental process	Gene Ontology Slim	GO:0032502	360	2532	5.73992e-42	2.12921e-39	PGAP1|UBE2Q1|ERRFI1|SUMO1|SCG2|IL6ST|FKBP4|HIPK1|GPM6A|GPM6B|IFNW1|RAB11A|DLG3|CDC73|CDC42SE2|ZNF706|IRX5|SLITRK6|SLITRK2|ZMYM5|IFNG|CPE|STK3|STK4|SMARCD1|UBE4B|STRBP|HCN1|BAK1|MAF|CSRP3|YBX3|IL7R|TNFSF11|ACTA1|ELAVL1|ACVR1C|CDKN1B|LSM14A|CELF1|PUM1|GAP43	http://amigo.geneontology.org/amigo/term/GO:0032502
developmental process	Gene Ontology	GO:0032502	360	2532	5.73992e-42	2.12921e-39	PGAP1|UBE2Q1|ERRFI1|SUMO1|SCG2|IL6ST|FKBP4|HIPK1|GPM6A|GPM6B|IFNW1|RAB11A|DLG3|CDC73|CDC42SE2|ZNF706|IRX5|SLITRK6|SLITRK2|ZMYM5|IFNG|CPE|STK3|STK4|SMARCD1|UBE4B|STRBP|HCN1|BAK1|MAF|CSRP3|YBX3|IL7R|TNFSF11|ACTA1|ELAVL1|ACVR1C|CDKN1B|LSM14A|CELF1|PUM1|GAP43	http://amigo.geneontology.org/amigo/term/GO:0032502
regulation of macromolecule metabolic process	Gene Ontology Slim	GO:0060255	377	2730	1.53144e-41	5.39681e-39	HIF3A|ERRFI1|SUMO1|RIC1|HIPK3|SRSF10|IFNW1|LHX2|OTUD7B|SMG1|CDC73|ZNF706|IRX5|HBS1L|IGF1R|ZMYM5|IFNG|SP1|MDFIC|STK3|STK4|CCND2|BAK1|MAF|ATMIN|CSRP3|YBX3|IL7R|TNFSF11|ACTA1|ELAVL1|ACVR1C|CDKN1B|LSM14A|CELF4|CELF1|PUM1|ZNF451|TADA2B|SOX17|NFIL3|FOXJ2|HOXB3|	http://amigo.geneontology.org/amigo/term/GO:0060255
regulation of macromolecule metabolic process	Gene Ontology	GO:0060255	377	2730	1.53144e-41	5.39681e-39	HIF3A|ERRFI1|SUMO1|RIC1|HIPK3|SRSF10|IFNW1|LHX2|OTUD7B|SMG1|CDC73|ZNF706|IRX5|HBS1L|IGF1R|ZMYM5|IFNG|SP1|MDFIC|STK3|STK4|CCND2|BAK1|MAF|ATMIN|CSRP3|YBX3|IL7R|TNFSF11|ACTA1|ELAVL1|ACVR1C|CDKN1B|LSM14A|CELF4|CELF1|PUM1|ZNF451|TADA2B|SOX17|NFIL3|FOXJ2|HOXB3|	http://amigo.geneontology.org/amigo/term/GO:0060255
regulation of metabolic process	Gene Ontology Slim	GO:0019222	396	2964	8.19212e-41	2.74943e-38	HIF3A|ERRFI1|SUMO1|RIC1|HIPK3|SRSF10|IFNW1|LHX2|OTUD7B|SMG1|CDC73|ZNF706|SPTLC1|IRX5|HBS1L|IGF1R|ZMYM5|IFNG|SP1|MDFIC|STK3|STK4|CAPRIN1|CCND2|BAK1|MAF|ATMIN|CSRP3|YBX3|IL7R|TNFSF11|ACTA1|ELAVL1|ACVR1C|CDKN1B|LSM14A|CELF4|CELF1|PUM1|ZNF451|TADA2B|SOX17|NFI	http://amigo.geneontology.org/amigo/term/GO:0019222
regulation of metabolic process	Gene Ontology	GO:0019222	396	2964	8.19212e-41	2.74943e-38	HIF3A|ERRFI1|SUMO1|RIC1|HIPK3|SRSF10|IFNW1|LHX2|OTUD7B|SMG1|CDC73|ZNF706|SPTLC1|IRX5|HBS1L|IGF1R|ZMYM5|IFNG|SP1|MDFIC|STK3|STK4|CAPRIN1|CCND2|BAK1|MAF|ATMIN|CSRP3|YBX3|IL7R|TNFSF11|ACTA1|ELAVL1|ACVR1C|CDKN1B|LSM14A|CELF4|CELF1|PUM1|ZNF451|TADA2B|SOX17|NFI	http://amigo.geneontology.org/amigo/term/GO:0019222
anatomical structure development	Gene Ontology Slim	GO:0048856	332	2308	2.25375e-39	7.22019e-37	LIN7A|PGAP1|LIN7C|AFF4|COL11A1|UBE2Q1|ERRFI1|SUMO1|SCG2|IL6ST|FKBP4|ZFAND5|GPM6A|GPM6B|RBM24|BDNF|NKX2-1|CAV2|KITLG|IFNW1|CYP26B1|DLG3|ADAMTS6|CDC73|BRCA1|ADAMTS2|RBPJ|CLOCK|DYNLT1|RORB|RORA|CBFA2T2|KMT5B|PLPP3|CBFB|EGR1|MKLN1|IRX5|LBH|PTBP1|LMO4|CDKN2B|C	http://amigo.geneontology.org/amigo/term/GO:0048856
anatomical structure development	Gene Ontology	GO:0048856	332	2308	2.25375e-39	7.22019e-37	LIN7A|PGAP1|LIN7C|AFF4|COL11A1|UBE2Q1|ERRFI1|SUMO1|SCG2|IL6ST|FKBP4|ZFAND5|GPM6A|GPM6B|RBM24|BDNF|NKX2-1|CAV2|KITLG|IFNW1|CYP26B1|DLG3|ADAMTS6|CDC73|BRCA1|ADAMTS2|RBPJ|CLOCK|DYNLT1|RORB|RORA|CBFA2T2|KMT5B|PLPP3|CBFB|EGR1|MKLN1|IRX5|LBH|PTBP1|LMO4|CDKN2B|C	http://amigo.geneontology.org/amigo/term/GO:0048856
positive regulation of biological process	Gene Ontology Slim	GO:0048518	346	2476	8.49304e-39	2.60256e-36	HIF3A|SUMO1|SCG2|IL6ST|HIPK1|GPM6A|GPM6B|IFNW1|CDC73|SPTLC1|SLITRK6|IGF1R|SLITRK2|IFNG|SP1|STK3|STK4|CAPRIN1|SNAP25|CCND2|BAK1|MAF|ATMIN|CSRP3|YBX3|IL7R|TNFSF11|ACTA1|ELAVL1|ACVR1C|CDKN1B|CELF4|CELF1|PUM1|TADA2B|KCNMA1|SOX17|SLC30A3|NFIL3|FOXJ2|CHUK|SENP1	http://amigo.geneontology.org/amigo/term/GO:0048518
positive regulation of biological process	Gene Ontology	GO:0048518	346	2476	8.49304e-39	2.60256e-36	HIF3A|SUMO1|SCG2|IL6ST|HIPK1|GPM6A|GPM6B|IFNW1|CDC73|SPTLC1|SLITRK6|IGF1R|SLITRK2|IFNG|SP1|STK3|STK4|CAPRIN1|SNAP25|CCND2|BAK1|MAF|ATMIN|CSRP3|YBX3|IL7R|TNFSF11|ACTA1|ELAVL1|ACVR1C|CDKN1B|CELF4|CELF1|PUM1|TADA2B|KCNMA1|SOX17|SLC30A3|NFIL3|FOXJ2|CHUK|SENP1	http://amigo.geneontology.org/amigo/term/GO:0048518
positive regulation of cellular process	Gene Ontology Slim	GO:0048522	320	2216	3.77899e-38	1.10976e-35	BCL2L1|HIF3A|TRIM13|EGR1|TFAP2C|SUMO1|TSPAN14|SCG2|IL6ST|KCNMA1|HIPK1|FZD5|GPM6A|CREBL2|POLR3A|DPH6|BDNF|ARL2BP|CAV2|THOC1|GPR37|MSR1|IFNW1|ADAMTS3|CDC73|MAP3K2|FNDC5|RBPJ|CLOCK|MPP7|RORB|RORA|CBFA2T2|DDIT4|CBFB|SAP18|SPTLC1|PROX1|LBH|CDKN2B|IGF1R|SCAMP5|	http://amigo.geneontology.org/amigo/term/GO:0048522
positive regulation of cellular process	Gene Ontology	GO:0048522	320	2216	3.77899e-38	1.10976e-35	BCL2L1|HIF3A|TRIM13|EGR1|TFAP2C|SUMO1|TSPAN14|SCG2|IL6ST|KCNMA1|HIPK1|FZD5|GPM6A|CREBL2|POLR3A|DPH6|BDNF|ARL2BP|CAV2|THOC1|GPR37|MSR1|IFNW1|ADAMTS3|CDC73|MAP3K2|FNDC5|RBPJ|CLOCK|MPP7|RORB|RORA|CBFA2T2|DDIT4|CBFB|SAP18|SPTLC1|PROX1|LBH|CDKN2B|IGF1R|SCAMP5|	http://amigo.geneontology.org/amigo/term/GO:0048522
regulation of cellular metabolic process	Gene Ontology Slim	GO:0031323	374	2810	5.28277e-38	1.48932e-35	HIF3A|ERRFI1|SUMO1|RIC1|HIPK3|SRSF10|IFNW1|LHX2|OTUD7B|CDC73|ZNF706|SPTLC1|IRX5|HBS1L|IGF1R|ZMYM5|IFNG|SP1|MDFIC|STK3|STK4|CAPRIN1|CCND2|BAK1|MAF|ATMIN|CSRP3|YBX3|TNFSF11|ELAVL1|ACVR1C|CDKN1B|LSM14A|CELF4|CELF1|PUM1|ZNF451|TADA2B|SOX17|NFIL3|FOXJ2|HOXB3|D	http://amigo.geneontology.org/amigo/term/GO:0031323
regulation of cellular metabolic process	Gene Ontology	GO:0031323	374	2810	5.28277e-38	1.48932e-35	HIF3A|ERRFI1|SUMO1|RIC1|HIPK3|SRSF10|IFNW1|LHX2|OTUD7B|CDC73|ZNF706|SPTLC1|IRX5|HBS1L|IGF1R|ZMYM5|IFNG|SP1|MDFIC|STK3|STK4|CAPRIN1|CCND2|BAK1|MAF|ATMIN|CSRP3|YBX3|TNFSF11|ELAVL1|ACVR1C|CDKN1B|LSM14A|CELF4|CELF1|PUM1|ZNF451|TADA2B|SOX17|NFIL3|FOXJ2|HOXB3|D	http://amigo.geneontology.org/amigo/term/GO:0031323
regulation of primary metabolic process	Gene Ontology Slim	GO:0080090	361	2681	1.60627e-37	4.35421e-35	HIF3A|ERRFI1|SUMO1|RIC1|HIPK3|SRSF10|IFNW1|LHX2|OTUD7B|CDC73|COMMD7|IRX5|HBS1L|IGF1R|ZMYM5|IFNG|SP1|MDFIC|STK3|STK4|CCND2|BAK1|MAF|ATMIN|CSRP3|YBX3|TNFSF11|ELAVL1|ACVR1C|CDKN1B|LSM14A|CELF4|CELF1|PUM1|ZNF451|TADA2B|SOX17|NFIL3|FOXJ2|HOXB3|SENP2|SENP1|CUX2	http://amigo.geneontology.org/amigo/term/GO:0080090
regulation of primary metabolic process	Gene Ontology	GO:0080090	361	2681	1.60627e-37	4.35421e-35	HIF3A|ERRFI1|SUMO1|RIC1|HIPK3|SRSF10|IFNW1|LHX2|OTUD7B|CDC73|COMMD7|IRX5|HBS1L|IGF1R|ZMYM5|IFNG|SP1|MDFIC|STK3|STK4|CCND2|BAK1|MAF|ATMIN|CSRP3|YBX3|TNFSF11|ELAVL1|ACVR1C|CDKN1B|LSM14A|CELF4|CELF1|PUM1|ZNF451|TADA2B|SOX17|NFIL3|FOXJ2|HOXB3|SENP2|SENP1|CUX2	http://amigo.geneontology.org/amigo/term/GO:0080090
regulation of nitrogen compound metabolic process	Gene Ontology Slim	GO:0051171	355	2624	3.14617e-37	8.21267e-35	HIF3A|ERRFI1|SUMO1|RIC1|HIPK3|SRSF10|IFNW1|LHX2|OTUD7B|CDC73|COMMD7|IRX5|HBS1L|IGF1R|ZMYM5|IFNG|SP1|MDFIC|STK3|STK4|CCND2|BAK1|MAF|ATMIN|CSRP3|YBX3|TNFSF11|ELAVL1|ACVR1C|CDKN1B|LSM14A|CELF4|CELF1|PUM1|ZNF451|TADA2B|SOX17|NFIL3|FOXJ2|HOXB3|SENP2|SENP1|CUX2	http://amigo.geneontology.org/amigo/term/GO:0051171
regulation of nitrogen compound metabolic process	Gene Ontology	GO:0051171	355	2624	3.14617e-37	8.21267e-35	HIF3A|ERRFI1|SUMO1|RIC1|HIPK3|SRSF10|IFNW1|LHX2|OTUD7B|CDC73|COMMD7|IRX5|HBS1L|IGF1R|ZMYM5|IFNG|SP1|MDFIC|STK3|STK4|CCND2|BAK1|MAF|ATMIN|CSRP3|YBX3|TNFSF11|ELAVL1|ACVR1C|CDKN1B|LSM14A|CELF4|CELF1|PUM1|ZNF451|TADA2B|SOX17|NFIL3|FOXJ2|HOXB3|SENP2|SENP1|CUX2	http://amigo.geneontology.org/amigo/term/GO:0051171
regulation of gene expression	Gene Ontology Slim	GO:0010468	293	1963	4.59007e-37	1.15539e-34	HIF3A|TRIM13|ZFX|DPH6|ZNF451|SUMO1|KMT5A|UHMK1|PRMT6|FZD5|SRSF10|CREBL2|CAPRIN1|RBM24|SKIL|CCNT2|MAP3K7|KLF7|LHX2|OTUD7B|SMG1|GIGYF2|CDC73|MAP3K2|ZNF148|RBPJ|CLOCK|THRB|RORB|RORA|CBFA2T2|KMT5B|ESRP1|PRKACB|EGR1|SAP18|ACTC1|IRX5|LBH|MBNL2|HBS1L|COMMD7|KLF5	http://amigo.geneontology.org/amigo/term/GO:0010468
regulation of gene expression	Gene Ontology	GO:0010468	293	1963	4.59007e-37	1.15539e-34	HIF3A|TRIM13|ZFX|DPH6|ZNF451|SUMO1|KMT5A|UHMK1|PRMT6|FZD5|SRSF10|CREBL2|CAPRIN1|RBM24|SKIL|CCNT2|MAP3K7|KLF7|LHX2|OTUD7B|SMG1|GIGYF2|CDC73|MAP3K2|ZNF148|RBPJ|CLOCK|THRB|RORB|RORA|CBFA2T2|KMT5B|ESRP1|PRKACB|EGR1|SAP18|ACTC1|IRX5|LBH|MBNL2|HBS1L|COMMD7|KLF5	http://amigo.geneontology.org/amigo/term/GO:0010468
negative regulation of biological process	Gene Ontology Slim	GO:0048519	309	2144	1.28752e-36	3.04132e-34	BCL2L1|ERRFI1|TRIM13|PGAP2|CD9|HIF3A|SUMO1|KMT5A|SCG2|IL6ST|FKBP4|FZD5|SRSF10|CAPRIN1|RBM24|SKIL|NKX2-1|CAV2|KITLG|GPR37|DLG3|OTUD7B|SMG1|PROX1|PPP1R2|BRCA1|HEY2|RBPJ|THRB|RORB|RORA|CBFA2T2|UBR5|SAP18|ACTC1|PTBP1|MAPRE1|NABP1|CDKN2B|IGF1R|SCAMP5|DDX3X|LRR	http://amigo.geneontology.org/amigo/term/GO:0048519
negative regulation of biological process	Gene Ontology	GO:0048519	309	2144	1.28752e-36	3.04132e-34	BCL2L1|ERRFI1|TRIM13|PGAP2|CD9|HIF3A|SUMO1|KMT5A|SCG2|IL6ST|FKBP4|FZD5|SRSF10|CAPRIN1|RBM24|SKIL|NKX2-1|CAV2|KITLG|GPR37|DLG3|OTUD7B|SMG1|PROX1|PPP1R2|BRCA1|HEY2|RBPJ|THRB|RORB|RORA|CBFA2T2|UBR5|SAP18|ACTC1|PTBP1|MAPRE1|NABP1|CDKN2B|IGF1R|SCAMP5|DDX3X|LRR	http://amigo.geneontology.org/amigo/term/GO:0048519
multicellular organism development	Gene Ontology Slim	GO:0007275	302	2070	1.29454e-36	3.04132e-34	LIN7A|PGAP1|EGR1|COL11A1|UBE2Q1|ERRFI1|KMT5B|SCG2|IL6ST|FKBP4|ZFAND5|GPM6A|GPM6B|BDNF|NKX2-1|CAV2|KITLG|IFNW1|CYP26B1|DLG3|ADAMTS6|CDC73|BRCA1|ADAMTS2|RBPJ|CLOCK|THRB|RORB|RORA|CBFA2T2|DDIT4|PLPP3|CBFB|ACTC1|IRX5|LBH|SLITRK6|STAT3|SLITRK2|ANGPT1|ZMYM5|IFN	http://amigo.geneontology.org/amigo/term/GO:0007275
multicellular organism development	Gene Ontology	GO:0007275	302	2070	1.29454e-36	3.04132e-34	LIN7A|PGAP1|EGR1|COL11A1|UBE2Q1|ERRFI1|KMT5B|SCG2|IL6ST|FKBP4|ZFAND5|GPM6A|GPM6B|BDNF|NKX2-1|CAV2|KITLG|IFNW1|CYP26B1|DLG3|ADAMTS6|CDC73|BRCA1|ADAMTS2|RBPJ|CLOCK|THRB|RORB|RORA|CBFA2T2|DDIT4|PLPP3|CBFB|ACTC1|IRX5|LBH|SLITRK6|STAT3|SLITRK2|ANGPT1|ZMYM5|IFN	http://amigo.geneontology.org/amigo/term/GO:0007275
nucleus	Gene Ontology Slim	GO:0005634	426	3458	1.55786e-36	3.54188e-34	HIF3A|PGAP2|RNF13|SUMO1|FAM222B|FKBP4|HIPK1|AGL|SRSF10|LHX2|OTUD7B|SMG1|CDC73|ZNF706|GRWD1|IRX5|WEE1|PPHLN1|WDR3|SREK1|WIPI2|SP1|MDFIC|STK4|SMARCD1|OSBPL3|UBE4B|STRBP|AKAP7|CCND2|SYAP1|ATF7IP2|MAF|ATMIN|CSRP3|IP6K1|YBX3|ELAVL1|CDKN1B|CELF1|CRIPT|BAZ2B|NXF	http://amigo.geneontology.org/amigo/term/GO:0005634
nucleus	Gene Ontology	GO:0005634	426	3458	1.55786e-36	3.54188e-34	HIF3A|PGAP2|RNF13|SUMO1|FAM222B|FKBP4|HIPK1|AGL|SRSF10|LHX2|OTUD7B|SMG1|CDC73|ZNF706|GRWD1|IRX5|WEE1|PPHLN1|WDR3|SREK1|WIPI2|SP1|MDFIC|STK4|SMARCD1|OSBPL3|UBE4B|STRBP|AKAP7|CCND2|SYAP1|ATF7IP2|MAF|ATMIN|CSRP3|IP6K1|YBX3|ELAVL1|CDKN1B|CELF1|CRIPT|BAZ2B|NXF	http://amigo.geneontology.org/amigo/term/GO:0005634
protein binding	Gene Ontology Slim	GO:0005515	388	3031	3.58731e-36	7.90105e-34	HIF3A|ERRFI1|AGL|SUMO1|SCG2|IL6ST|FKBP4|IFNW1|DLG3|OTUD7B|CDC73|COMMD7|NAPG|NAPB|ABCD3|IGF1R|KMT5A|CAPZA2|IFNG|SP1|CPE|STK3|STK4|RIC1|UBE4B|AKAP7|AKAP1|HCN1|CCND2|BAK1|ANGPTL1|CSRP3|FDX1|TNFSF11|ELAVL1|ACVR1C|CDKN1B|CELF1|CRIPT|GAP43|KCNMA1|SOX17|VTA1|FOX	http://amigo.geneontology.org/amigo/term/GO:0005515
protein binding	Gene Ontology	GO:0005515	388	3031	3.58731e-36	7.90105e-34	HIF3A|ERRFI1|AGL|SUMO1|SCG2|IL6ST|FKBP4|IFNW1|DLG3|OTUD7B|CDC73|COMMD7|NAPG|NAPB|ABCD3|IGF1R|KMT5A|CAPZA2|IFNG|SP1|CPE|STK3|STK4|RIC1|UBE4B|AKAP7|AKAP1|HCN1|CCND2|BAK1|ANGPTL1|CSRP3|FDX1|TNFSF11|ELAVL1|ACVR1C|CDKN1B|CELF1|CRIPT|GAP43|KCNMA1|SOX17|VTA1|FOX	http://amigo.geneontology.org/amigo/term/GO:0005515
system development	Gene Ontology Slim	GO:0048731	279	1849	6.07022e-36	1.29645e-33	LIN7A|PGAP1|EGR1|COL11A1|UBE2Q1|ERRFI1|KMT5B|SCG2|IL6ST|FKBP4|ZFAND5|GPM6A|GPM6B|BDNF|NKX2-1|CAV2|KITLG|IFNW1|CYP26B1|DLG3|ADAMTS6|CDC73|ADAMTS2|RBPJ|CLOCK|THRB|RORB|RORA|CBFA2T2|DDIT4|PLPP3|CBFB|ACTC1|IRX5|SLITRK6|STAT3|SLITRK2|ANGPT1|SNAP25|IFNG|MTM1|TM	http://amigo.geneontology.org/amigo/term/GO:0048731
system development	Gene Ontology	GO:0048731	279	1849	6.07022e-36	1.29645e-33	LIN7A|PGAP1|EGR1|COL11A1|UBE2Q1|ERRFI1|KMT5B|SCG2|IL6ST|FKBP4|ZFAND5|GPM6A|GPM6B|BDNF|NKX2-1|CAV2|KITLG|IFNW1|CYP26B1|DLG3|ADAMTS6|CDC73|ADAMTS2|RBPJ|CLOCK|THRB|RORB|RORA|CBFA2T2|DDIT4|PLPP3|CBFB|ACTC1|IRX5|SLITRK6|STAT3|SLITRK2|ANGPT1|SNAP25|IFNG|MTM1|TM	http://amigo.geneontology.org/amigo/term/GO:0048731
cytoplasm	Gene Ontology Slim	GO:0005737	574	5312	1.11295e-35	2.30708e-33	HIF3A|ERRFI1|PGAP2|PPP3R1|HSPA4|SUMO1|TMCO1|SCG2|RIC1|P4HA2|HIPK1|AGL|SRSF10|DLG3|OTUD7B|SMG1|CDC73|RNF13|CDC42SE2|ZNF706|NAPG|GRWD1|SPTLC2|NAPB|ABCD3|PPHLN1|IGF1R|CAPZA2|WIPI2|MDFIC|CPE|STK3|STK4|OSBPL3|UBE4B|STRBP|AKAP7|AKAP1|CCND2|SYAP1|ATF7IP2|BAK1|CS	http://amigo.geneontology.org/amigo/term/GO:0005737
cytoplasm	Gene Ontology	GO:0005737	574	5312	1.11295e-35	2.30708e-33	HIF3A|ERRFI1|PGAP2|PPP3R1|HSPA4|SUMO1|TMCO1|SCG2|RIC1|P4HA2|HIPK1|AGL|SRSF10|DLG3|OTUD7B|SMG1|CDC73|RNF13|CDC42SE2|ZNF706|NAPG|GRWD1|SPTLC2|NAPB|ABCD3|PPHLN1|IGF1R|CAPZA2|WIPI2|MDFIC|CPE|STK3|STK4|OSBPL3|UBE4B|STRBP|AKAP7|AKAP1|CCND2|SYAP1|ATF7IP2|BAK1|CS	http://amigo.geneontology.org/amigo/term/GO:0005737
response to stimulus	Gene Ontology Slim	GO:0050896	473	4068	2.64974e-35	5.33581e-33	HIF3A|ERRFI1|PGAP2|HSPA2|SCG2|IL6ST|HIPK3|HIPK1|IFNW1|RAB11A|OTUD7B|SMG1|CDC73|GPR180|CDC42SE2|COMMD7|SLITRK6|IGF1R|IFNG|CPE|CRMP1|STK3|STK4|UBE4B|STRBP|AKAP1|HCN1|BAK1|ANGPTL1|CSRP3|STK38L|YBX3|ARHGAP19|IL7R|TNFSF11|ACVR1C|GABRG2|CELF4|UBE2D3|NDNF|PUM1|G	http://amigo.geneontology.org/amigo/term/GO:0050896
response to stimulus	Gene Ontology	GO:0050896	473	4068	2.64974e-35	5.33581e-33	HIF3A|ERRFI1|PGAP2|HSPA2|SCG2|IL6ST|HIPK3|HIPK1|IFNW1|RAB11A|OTUD7B|SMG1|CDC73|GPR180|CDC42SE2|COMMD7|SLITRK6|IGF1R|IFNG|CPE|CRMP1|STK3|STK4|UBE4B|STRBP|AKAP1|HCN1|BAK1|ANGPTL1|CSRP3|STK38L|YBX3|ARHGAP19|IL7R|TNFSF11|ACVR1C|GABRG2|CELF4|UBE2D3|NDNF|PUM1|G	http://amigo.geneontology.org/amigo/term/GO:0050896
heterocyclic compound binding	Gene Ontology Slim	GO:1901363	379	2963	3.46275e-35	6.77929e-33	HIF3A|HSPA2|HSPA4|SUMO1|FKBP4|HIPK1|SRSF10|RAB11A|LHX2|OTUD7B|SMG1|N6AMT1|SPTLC2|SPTLC1|IRX5|WEE1|HBS1L|IGF1R|WDR3|ZMYM5|SP1|STK3|STK4|CAPRIN1|UBE4B|STRBP|HCN1|ERI2|MAF|ATMIN|STK38L|YBX3|ENOX1|ACTA1|ELAVL1|ATP2A2|EMX2|CELF4|UBE2D3|CELF1|PUM1|TPK1|BAZ2B|PA	http://amigo.geneontology.org/amigo/term/GO:1901363
heterocyclic compound binding	Gene Ontology	GO:1901363	379	2963	3.46275e-35	6.77929e-33	HIF3A|HSPA2|HSPA4|SUMO1|FKBP4|HIPK1|SRSF10|RAB11A|LHX2|OTUD7B|SMG1|N6AMT1|SPTLC2|SPTLC1|IRX5|WEE1|HBS1L|IGF1R|WDR3|ZMYM5|SP1|STK3|STK4|CAPRIN1|UBE4B|STRBP|HCN1|ERI2|MAF|ATMIN|STK38L|YBX3|ENOX1|ACTA1|ELAVL1|ATP2A2|EMX2|CELF4|UBE2D3|CELF1|PUM1|TPK1|BAZ2B|PA	http://amigo.geneontology.org/amigo/term/GO:1901363
regulation of macromolecule biosynthetic process	Gene Ontology Slim	GO:0010556	276	1843	4.87428e-35	9.28484e-33	HIF3A|TRIM13|ZFX|ZNF451|SUMO1|KMT5A|ZBTB8A|PRMT6|FZD5|CREBL2|CAPRIN1|DPH6|SKIL|ARL2BP|MAP3K7|ETS2|LHX2|OTUD7B|GIGYF2|CDC73|MAP3K2|ZNF148|RBPJ|CLOCK|THRB|RORB|RORA|CBFA2T2|KMT5B|CBFB|EGR1|SAP18|IRX5|LBH|HBS1L|COMMD7|BRCA1|CD28|DDX3X|ZMYM5|IFNG|SP1|MDFIC|CR	http://amigo.geneontology.org/amigo/term/GO:0010556
regulation of macromolecule biosynthetic process	Gene Ontology	GO:0010556	276	1843	4.87428e-35	9.28484e-33	HIF3A|TRIM13|ZFX|ZNF451|SUMO1|KMT5A|ZBTB8A|PRMT6|FZD5|CREBL2|CAPRIN1|DPH6|SKIL|ARL2BP|MAP3K7|ETS2|LHX2|OTUD7B|GIGYF2|CDC73|MAP3K2|ZNF148|RBPJ|CLOCK|THRB|RORB|RORA|CBFA2T2|KMT5B|CBFB|EGR1|SAP18|IRX5|LBH|HBS1L|COMMD7|BRCA1|CD28|DDX3X|ZMYM5|IFNG|SP1|MDFIC|CR	http://amigo.geneontology.org/amigo/term/GO:0010556
organic cyclic compound binding	Gene Ontology Slim	GO:0097159	382	3005	5.68158e-35	1.05378e-32	HIF3A|HSPA2|HSPA4|SUMO1|FKBP4|HIPK1|SRSF10|RAB11A|LHX2|OTUD7B|SMG1|N6AMT1|SPTLC2|SPTLC1|IRX5|WEE1|HBS1L|IGF1R|WDR3|ZMYM5|SP1|STK3|STK4|CAPRIN1|OSBPL3|UBE4B|STRBP|HCN1|ERI2|MAF|ATMIN|STK38L|YBX3|ENOX1|ACTA1|ELAVL1|ATP2A2|EMX2|CELF4|UBE2D3|CELF1|PUM1|TPK1|B	http://amigo.geneontology.org/amigo/term/GO:0097159
organic cyclic compound binding	Gene Ontology	GO:0097159	382	3005	5.68158e-35	1.05378e-32	HIF3A|HSPA2|HSPA4|SUMO1|FKBP4|HIPK1|SRSF10|RAB11A|LHX2|OTUD7B|SMG1|N6AMT1|SPTLC2|SPTLC1|IRX5|WEE1|HBS1L|IGF1R|WDR3|ZMYM5|SP1|STK3|STK4|CAPRIN1|OSBPL3|UBE4B|STRBP|HCN1|ERI2|MAF|ATMIN|STK38L|YBX3|ENOX1|ACTA1|ELAVL1|ATP2A2|EMX2|CELF4|UBE2D3|CELF1|PUM1|TPK1|B	http://amigo.geneontology.org/amigo/term/GO:0097159
negative regulation of cellular process	Gene Ontology Slim	GO:0048523	284	1929	6.10172e-35	1.10269e-32	BCL2L1|ERRFI1|PGAP2|CD9|HIF3A|KMT5A|SCG2|IL6ST|FKBP4|FZD5|SRSF10|CAPRIN1|SKIL|NKX2-1|CAV2|KITLG|GPR37|DLG3|OTUD7B|PROX1|PPP1R2|BRCA1|HEY2|RBPJ|THRB|RORB|RORA|CBFA2T2|UBR5|SAP18|ACTC1|PTBP1|MAPRE1|NABP1|CDKN2B|IGF1R|SCAMP5|DDX3X|LRRC4|WNK3|TMF1|LRRTM2|PRMT	http://amigo.geneontology.org/amigo/term/GO:0048523
negative regulation of cellular process	Gene Ontology	GO:0048523	284	1929	6.10172e-35	1.10269e-32	BCL2L1|ERRFI1|PGAP2|CD9|HIF3A|KMT5A|SCG2|IL6ST|FKBP4|FZD5|SRSF10|CAPRIN1|SKIL|NKX2-1|CAV2|KITLG|GPR37|DLG3|OTUD7B|PROX1|PPP1R2|BRCA1|HEY2|RBPJ|THRB|RORB|RORA|CBFA2T2|UBR5|SAP18|ACTC1|PTBP1|MAPRE1|NABP1|CDKN2B|IGF1R|SCAMP5|DDX3X|LRRC4|WNK3|TMF1|LRRTM2|PRMT	http://amigo.geneontology.org/amigo/term/GO:0048523
regulation of biosynthetic process	Gene Ontology Slim	GO:0009889	282	1912	8.36546e-35	1.47399e-32	HIF3A|TRIM13|ZFX|ZNF451|SUMO1|KMT5A|ZBTB8A|PRMT6|FZD5|CREBL2|CAPRIN1|DPH6|SKIL|ARL2BP|MAP3K7|ETS2|LHX2|OTUD7B|GIGYF2|CDC73|MAP3K2|ZNF148|RBPJ|CLOCK|THRB|RORB|RORA|CBFA2T2|KMT5B|CBFB|EGR1|SAP18|IRX5|LBH|HBS1L|COMMD7|BRCA1|CD28|DDX3X|ZMYM5|IFNG|SP1|MDFIC|CR	http://amigo.geneontology.org/amigo/term/GO:0009889
regulation of biosynthetic process	Gene Ontology	GO:0009889	282	1912	8.36546e-35	1.47399e-32	HIF3A|TRIM13|ZFX|ZNF451|SUMO1|KMT5A|ZBTB8A|PRMT6|FZD5|CREBL2|CAPRIN1|DPH6|SKIL|ARL2BP|MAP3K7|ETS2|LHX2|OTUD7B|GIGYF2|CDC73|MAP3K2|ZNF148|RBPJ|CLOCK|THRB|RORB|RORA|CBFA2T2|KMT5B|CBFB|EGR1|SAP18|IRX5|LBH|HBS1L|COMMD7|BRCA1|CD28|DDX3X|ZMYM5|IFNG|SP1|MDFIC|CR	http://amigo.geneontology.org/amigo/term/GO:0009889
ion binding	Gene Ontology Slim	GO:0043167	393	3158	2.94695e-34	5.0232e-32	HSPA2|PPP3R1|HSPA4|CPE|P4HA2|HIPK1|RAB11A|LHX2|OTUD7B|SMG1|RNF13|ZNF704|SPTLC2|SPTLC1|WEE1|HBS1L|PCDH11X|IGF1R|ZMYM5|WIPI2|SP1|STK3|STK4|PRRG4|UBE4B|PRRG1|HCN1|ERI2|ATMIN|CSRP3|FDX1|STK38L|MMP16|ACTA1|ACVR1C|LMO4|UBE2D3|NDNF|TPK1|BAZ2B|PANK3|BMS1|KCNMA1|S	http://amigo.geneontology.org/amigo/term/GO:0043167
ion binding	Gene Ontology	GO:0043167	393	3158	2.94695e-34	5.0232e-32	HSPA2|PPP3R1|HSPA4|CPE|P4HA2|HIPK1|RAB11A|LHX2|OTUD7B|SMG1|RNF13|ZNF704|SPTLC2|SPTLC1|WEE1|HBS1L|PCDH11X|IGF1R|ZMYM5|WIPI2|SP1|STK3|STK4|PRRG4|UBE4B|PRRG1|HCN1|ERI2|ATMIN|CSRP3|FDX1|STK38L|MMP16|ACTA1|ACVR1C|LMO4|UBE2D3|NDNF|TPK1|BAZ2B|PANK3|BMS1|KCNMA1|S	http://amigo.geneontology.org/amigo/term/GO:0043167
regulation of cellular biosynthetic process	Gene Ontology Slim	GO:0031326	278	1886	2.99339e-34	5.0232e-32	HIF3A|TRIM13|ZFX|ZNF451|SUMO1|KMT5A|ZBTB8A|PRMT6|FZD5|CREBL2|CAPRIN1|DPH6|SKIL|ARL2BP|MAP3K7|ETS2|LHX2|OTUD7B|GIGYF2|CDC73|MAP3K2|ZNF148|RBPJ|CLOCK|THRB|RORB|RORA|CBFA2T2|KMT5B|CBFB|EGR1|SAP18|IRX5|LBH|HBS1L|COMMD7|BRCA1|CD28|DDX3X|ZMYM5|IFNG|SP1|MDFIC|CR	http://amigo.geneontology.org/amigo/term/GO:0031326
regulation of cellular biosynthetic process	Gene Ontology	GO:0031326	278	1886	2.99339e-34	5.0232e-32	HIF3A|TRIM13|ZFX|ZNF451|SUMO1|KMT5A|ZBTB8A|PRMT6|FZD5|CREBL2|CAPRIN1|DPH6|SKIL|ARL2BP|MAP3K7|ETS2|LHX2|OTUD7B|GIGYF2|CDC73|MAP3K2|ZNF148|RBPJ|CLOCK|THRB|RORB|RORA|CBFA2T2|KMT5B|CBFB|EGR1|SAP18|IRX5|LBH|HBS1L|COMMD7|BRCA1|CD28|DDX3X|ZMYM5|IFNG|SP1|MDFIC|CR	http://amigo.geneontology.org/amigo/term/GO:0031326
regulation of RNA metabolic process	Gene Ontology Slim	GO:0051252	258	1685	4.71546e-34	7.72897e-32	HIF3A|TRIM13|ZFX|SUMO1|KMT5A|UHMK1|PRMT6|FZD5|SRSF10|CREBL2|SKIL|ARL2BP|MAP3K7|ETS2|LHX2|OTUD7B|CDC73|MAP3K2|ZNF148|RBPJ|CLOCK|THRB|RORB|RORA|CBFA2T2|KMT5B|ESRP1|CBFB|EGR1|SAP18|IRX5|LBH|MBNL2|COMMD7|ZBTB8A|STAT3|DDX3X|ZMYM5|IFNG|SP1|MDFIC|CREB1|ZNF367|ZN	http://amigo.geneontology.org/amigo/term/GO:0051252
regulation of RNA metabolic process	Gene Ontology	GO:0051252	258	1685	4.71546e-34	7.72897e-32	HIF3A|TRIM13|ZFX|SUMO1|KMT5A|UHMK1|PRMT6|FZD5|SRSF10|CREBL2|SKIL|ARL2BP|MAP3K7|ETS2|LHX2|OTUD7B|CDC73|MAP3K2|ZNF148|RBPJ|CLOCK|THRB|RORB|RORA|CBFA2T2|KMT5B|ESRP1|CBFB|EGR1|SAP18|IRX5|LBH|MBNL2|COMMD7|ZBTB8A|STAT3|DDX3X|ZMYM5|IFNG|SP1|MDFIC|CREB1|ZNF367|ZN	http://amigo.geneontology.org/amigo/term/GO:0051252
regulation of cellular macromolecule biosynthetic process	Gene Ontology Slim	GO:2000112	267	1797	2.37555e-33	3.74639e-31	HIF3A|TRIM13|ZFX|ZNF451|SUMO1|KMT5A|ZBTB8A|PRMT6|FZD5|CREBL2|CAPRIN1|DPH6|SKIL|CCNT2|MAP3K7|ETS2|LHX2|OTUD7B|GIGYF2|CDC73|MAP3K2|ZNF148|RBPJ|CLOCK|THRB|RORB|RORA|CBFA2T2|KMT5B|CBFB|EGR1|SAP18|IRX5|LBH|HBS1L|COMMD7|BRCA1|STAT3|DDX3X|ZMYM5|IFNG|SP1|MDFIC|CR	http://amigo.geneontology.org/amigo/term/GO:2000112
regulation of cellular macromolecule biosynthetic process	Gene Ontology	GO:2000112	267	1797	2.37555e-33	3.74639e-31	HIF3A|TRIM13|ZFX|ZNF451|SUMO1|KMT5A|ZBTB8A|PRMT6|FZD5|CREBL2|CAPRIN1|DPH6|SKIL|CCNT2|MAP3K7|ETS2|LHX2|OTUD7B|GIGYF2|CDC73|MAP3K2|ZNF148|RBPJ|CLOCK|THRB|RORB|RORA|CBFA2T2|KMT5B|CBFB|EGR1|SAP18|IRX5|LBH|HBS1L|COMMD7|BRCA1|STAT3|DDX3X|ZMYM5|IFNG|SP1|MDFIC|CR	http://amigo.geneontology.org/amigo/term/GO:2000112
regulation of nucleobase-containing compound metabolic process	Gene Ontology Slim	GO:0019219	264	1766	2.39199e-33	3.74639e-31	HIF3A|TRIM13|ZFX|SUMO1|KMT5A|PPP4R2|UHMK1|PRMT6|FZD5|SRSF10|CREBL2|SKIL|ARL2BP|MAP3K7|ETS2|LHX2|OTUD7B|CDC73|MAP3K2|ZNF148|RBPJ|CLOCK|THRB|RORB|RORA|CBFA2T2|DDIT4|KMT5B|ESRP1|CBFB|EGR1|SAP18|IRX5|LBH|MBNL2|COMMD7|ZBTB8A|STAT3|DDX3X|ZMYM5|IFNG|SP1|MDFIC|CR	http://amigo.geneontology.org/amigo/term/GO:0019219
regulation of nucleobase-containing compound metabolic process	Gene Ontology	GO:0019219	264	1766	2.39199e-33	3.74639e-31	HIF3A|TRIM13|ZFX|SUMO1|KMT5A|PPP4R2|UHMK1|PRMT6|FZD5|SRSF10|CREBL2|SKIL|ARL2BP|MAP3K7|ETS2|LHX2|OTUD7B|CDC73|MAP3K2|ZNF148|RBPJ|CLOCK|THRB|RORB|RORA|CBFA2T2|DDIT4|KMT5B|ESRP1|CBFB|EGR1|SAP18|IRX5|LBH|MBNL2|COMMD7|ZBTB8A|STAT3|DDX3X|ZMYM5|IFNG|SP1|MDFIC|CR	http://amigo.geneontology.org/amigo/term/GO:0019219
macromolecule biosynthetic process	Gene Ontology Slim	GO:0009059	322	2403	7.80985e-33	1.1966e-30	HIF3A|TRIM13|ZFX|DPH6|ZNF451|SUMO1|KMT5A|PRMT6|CHSY1|DOLPP1|PGAP2|CREBL2|POLR3A|SLC25A17|SLC25A16|SKIL|ARL2BP|MAP3K7|ETS2|LHX2|OTUD7B|PPP1R3C|GIGYF2|CDC73|MAP3K2|ZNF148|RBPJ|CLOCK|THRB|RORB|RORA|CBFA2T2|KMT5B|CBFB|EGR1|SAP18|GOLGA7|IRX5|LBH|HBS1L|SLC25A12	http://amigo.geneontology.org/amigo/term/GO:0009059
macromolecule biosynthetic process	Gene Ontology	GO:0009059	322	2403	7.80985e-33	1.1966e-30	HIF3A|TRIM13|ZFX|DPH6|ZNF451|SUMO1|KMT5A|PRMT6|CHSY1|DOLPP1|PGAP2|CREBL2|POLR3A|SLC25A17|SLC25A16|SKIL|ARL2BP|MAP3K7|ETS2|LHX2|OTUD7B|PPP1R3C|GIGYF2|CDC73|MAP3K2|ZNF148|RBPJ|CLOCK|THRB|RORB|RORA|CBFA2T2|KMT5B|CBFB|EGR1|SAP18|GOLGA7|IRX5|LBH|HBS1L|SLC25A12	http://amigo.geneontology.org/amigo/term/GO:0009059
cellular biosynthetic process	Gene Ontology Slim	GO:0044249	362	2890	7.99277e-32	1.18679e-29	HIF3A|PGAP2|SUMO1|HIPK3|AGL|LHX2|OTUD7B|CDC73|COMMD7|SPTLC2|SPTLC1|IRX5|ABCD3|HBS1L|ZMYM5|WIPI2|SP1|MDFIC|STK3|MAF|ATMIN|CSRP3|YBX3|TNFSF11|ELAVL1|CDKN1B|LSM14A|CAPRIN1|PUM1|TPK1|ZNF451|TADA2B|SOX17|NFIL3|FOXJ2|HOXB3|CHUK|SENP1|PPP1R10|CUX2|INSIG1|ZEB1|IN	http://amigo.geneontology.org/amigo/term/GO:0044249
cellular biosynthetic process	Gene Ontology	GO:0044249	362	2890	7.99277e-32	1.18679e-29	HIF3A|PGAP2|SUMO1|HIPK3|AGL|LHX2|OTUD7B|CDC73|COMMD7|SPTLC2|SPTLC1|IRX5|ABCD3|HBS1L|ZMYM5|WIPI2|SP1|MDFIC|STK3|MAF|ATMIN|CSRP3|YBX3|TNFSF11|ELAVL1|CDKN1B|LSM14A|CAPRIN1|PUM1|TPK1|ZNF451|TADA2B|SOX17|NFIL3|FOXJ2|HOXB3|CHUK|SENP1|PPP1R10|CUX2|INSIG1|ZEB1|IN	http://amigo.geneontology.org/amigo/term/GO:0044249
cellular developmental process	Gene Ontology Slim	GO:0048869	258	1747	8.08253e-32	1.18679e-29	BCL2L1|ERRFI1|DDIT4|COL11A1|HSPA2|IL6ST|FKBP4|HIPK1|GPM6A|CREBL2|CAPRIN1|BDNF|NKX2-1|CAV2|TRIM62|MSR1|IFNW1|CYP26B1|CDC73|FNDC5|RBPJ|DYNLT1|RORB|RORA|CBFA2T2|LMO4|PLPP3|CBFB|MKLN1|IRX5|PTBP1|CDKN2B|STAT3|SLITRK2|SNAP25|IFNG|MTM1|TMF1|PRMT6|CREB1|THRB|HOME	http://amigo.geneontology.org/amigo/term/GO:0048869
cellular developmental process	Gene Ontology	GO:0048869	258	1747	8.08253e-32	1.18679e-29	BCL2L1|ERRFI1|DDIT4|COL11A1|HSPA2|IL6ST|FKBP4|HIPK1|GPM6A|CREBL2|CAPRIN1|BDNF|NKX2-1|CAV2|TRIM62|MSR1|IFNW1|CYP26B1|CDC73|FNDC5|RBPJ|DYNLT1|RORB|RORA|CBFA2T2|LMO4|PLPP3|CBFB|MKLN1|IRX5|PTBP1|CDKN2B|STAT3|SLITRK2|SNAP25|IFNG|MTM1|TMF1|PRMT6|CREB1|THRB|HOME	http://amigo.geneontology.org/amigo/term/GO:0048869
biosynthetic process	Gene Ontology Slim	GO:0009058	371	3000	1.15417e-31	1.66012e-29	HIF3A|PGAP2|SUMO1|HIPK3|AGL|LHX2|OTUD7B|CDC73|ZNF706|SPTLC2|SPTLC1|IRX5|ABCD3|HBS1L|ZMYM5|WIPI2|SP1|MDFIC|STK3|MAF|ATMIN|CSRP3|FDX1|YBX3|TNFSF11|ELAVL1|CDKN1B|LSM14A|CAPRIN1|PUM1|TPK1|ZNF451|TADA2B|SOX17|NFIL3|FOXJ2|HOXB3|CHUK|SENP1|PPP1R10|CUX2|INSIG1|ZE	http://amigo.geneontology.org/amigo/term/GO:0009058
biosynthetic process	Gene Ontology	GO:0009058	371	3000	1.15417e-31	1.66012e-29	HIF3A|PGAP2|SUMO1|HIPK3|AGL|LHX2|OTUD7B|CDC73|ZNF706|SPTLC2|SPTLC1|IRX5|ABCD3|HBS1L|ZMYM5|WIPI2|SP1|MDFIC|STK3|MAF|ATMIN|CSRP3|FDX1|YBX3|TNFSF11|ELAVL1|CDKN1B|LSM14A|CAPRIN1|PUM1|TPK1|ZNF451|TADA2B|SOX17|NFIL3|FOXJ2|HOXB3|CHUK|SENP1|PPP1R10|CUX2|INSIG1|ZE	http://amigo.geneontology.org/amigo/term/GO:0009058
organic substance biosynthetic process	Gene Ontology Slim	GO:1901576	366	2944	1.29727e-31	1.82863e-29	HIF3A|PGAP2|SUMO1|HIPK3|AGL|LHX2|OTUD7B|CDC73|COMMD7|SPTLC2|SPTLC1|IRX5|ABCD3|HBS1L|ZMYM5|WIPI2|SP1|MDFIC|STK3|MAF|ATMIN|CSRP3|FDX1|YBX3|TNFSF11|ELAVL1|CDKN1B|LSM14A|CAPRIN1|PUM1|TPK1|ZNF451|TADA2B|SOX17|NFIL3|FOXJ2|HOXB3|CHUK|SENP1|PPP1R10|CUX2|INSIG1|ZE	http://amigo.geneontology.org/amigo/term/GO:1901576
organic substance biosynthetic process	Gene Ontology	GO:1901576	366	2944	1.29727e-31	1.82863e-29	HIF3A|PGAP2|SUMO1|HIPK3|AGL|LHX2|OTUD7B|CDC73|COMMD7|SPTLC2|SPTLC1|IRX5|ABCD3|HBS1L|ZMYM5|WIPI2|SP1|MDFIC|STK3|MAF|ATMIN|CSRP3|FDX1|YBX3|TNFSF11|ELAVL1|CDKN1B|LSM14A|CAPRIN1|PUM1|TPK1|ZNF451|TADA2B|SOX17|NFIL3|FOXJ2|HOXB3|CHUK|SENP1|PPP1R10|CUX2|INSIG1|ZE	http://amigo.geneontology.org/amigo/term/GO:1901576
cellular macromolecule biosynthetic process	Gene Ontology Slim	GO:0034645	313	2351	2.07706e-31	2.87042e-29	HIF3A|TRIM13|ZFX|DPH6|ZNF451|SUMO1|KMT5A|PRMT6|CHSY1|DOLPP1|PGAP2|CREBL2|POLR3A|SLC25A17|SLC25A16|SKIL|CCNT2|MAP3K7|ETS2|LHX2|OTUD7B|PPP1R3C|GIGYF2|CDC73|MAP3K2|ZNF148|RBPJ|CLOCK|THRB|RORB|RORA|CBFA2T2|KMT5B|CBFB|EGR1|SAP18|GOLGA7|IRX5|LBH|HBS1L|SLC25A12|	http://amigo.geneontology.org/amigo/term/GO:0034645
cellular macromolecule biosynthetic process	Gene Ontology	GO:0034645	313	2351	2.07706e-31	2.87042e-29	HIF3A|TRIM13|ZFX|DPH6|ZNF451|SUMO1|KMT5A|PRMT6|CHSY1|DOLPP1|PGAP2|CREBL2|POLR3A|SLC25A17|SLC25A16|SKIL|CCNT2|MAP3K7|ETS2|LHX2|OTUD7B|PPP1R3C|GIGYF2|CDC73|MAP3K2|ZNF148|RBPJ|CLOCK|THRB|RORB|RORA|CBFA2T2|KMT5B|CBFB|EGR1|SAP18|GOLGA7|IRX5|LBH|HBS1L|SLC25A12|	http://amigo.geneontology.org/amigo/term/GO:0034645
anatomical structure morphogenesis	Gene Ontology Slim	GO:0009653	192	1110	4.78592e-31	6.48676e-29	BCL2L1|ERRFI1|LIN7C|COL11A1|SCG2|CHSY1|ZFAND5|GPM6A|CAPRIN1|BDNF|NKX2-1|DLG3|CDC73|RBPJ|THRB|RORB|RORA|MKLN1|IRX5|SLITRK6|CRISPLD2|CRISPLD1|STAT3|SLITRK2|MTM1|TMF1|CPE|SMAD1|ANGPT2|FLRT3|STK3|STK4|SNAI2|CTSV|BMP7|UBE4B|ANGPT1|BMP2|RFX4|FEM1B|NPY1R|SYT4|HI	http://amigo.geneontology.org/amigo/term/GO:0009653
anatomical structure morphogenesis	Gene Ontology	GO:0009653	192	1110	4.78592e-31	6.48676e-29	BCL2L1|ERRFI1|LIN7C|COL11A1|SCG2|CHSY1|ZFAND5|GPM6A|CAPRIN1|BDNF|NKX2-1|DLG3|CDC73|RBPJ|THRB|RORB|RORA|MKLN1|IRX5|SLITRK6|CRISPLD2|CRISPLD1|STAT3|SLITRK2|MTM1|TMF1|CPE|SMAD1|ANGPT2|FLRT3|STK3|STK4|SNAI2|CTSV|BMP7|UBE4B|ANGPT1|BMP2|RFX4|FEM1B|NPY1R|SYT4|HI	http://amigo.geneontology.org/amigo/term/GO:0009653
RNA biosynthetic process	Gene Ontology Slim	GO:0032774	249	1684	9.43204e-31	1.23987e-28	HIF3A|TRIM13|ZFX|SUMO1|KMT5A|ZBTB8A|PRMT6|CREBL2|POLR3A|SKIL|ARL2BP|MAP3K7|ETS2|LHX2|OTUD7B|CDC73|MAP3K2|ZNF148|RBPJ|CLOCK|THRB|RORB|RORA|CBFA2T2|KMT5B|CBFB|EGR1|SAP18|IRX5|LBH|COMMD7|BRCA1|STAT3|DDX3X|ZMYM5|IFNG|SP1|MDFIC|CREB1|ZNF367|ZNF366|STK3|DMRTC2|	http://amigo.geneontology.org/amigo/term/GO:0032774
RNA biosynthetic process	Gene Ontology	GO:0032774	249	1684	9.43204e-31	1.23987e-28	HIF3A|TRIM13|ZFX|SUMO1|KMT5A|ZBTB8A|PRMT6|CREBL2|POLR3A|SKIL|ARL2BP|MAP3K7|ETS2|LHX2|OTUD7B|CDC73|MAP3K2|ZNF148|RBPJ|CLOCK|THRB|RORB|RORA|CBFA2T2|KMT5B|CBFB|EGR1|SAP18|IRX5|LBH|COMMD7|BRCA1|STAT3|DDX3X|ZMYM5|IFNG|SP1|MDFIC|CREB1|ZNF367|ZNF366|STK3|DMRTC2|	http://amigo.geneontology.org/amigo/term/GO:0032774
regulation of RNA biosynthetic process	Gene Ontology Slim	GO:2001141	242	1612	9.67546e-31	1.23987e-28	HIF3A|TRIM13|ZFX|SUMO1|KMT5A|ZBTB8A|PRMT6|CREBL2|SKIL|ARL2BP|MAP3K7|ETS2|LHX2|OTUD7B|CDC73|MAP3K2|ZNF148|RBPJ|CLOCK|THRB|RORB|RORA|CBFA2T2|KMT5B|CBFB|EGR1|SAP18|IRX5|LBH|COMMD7|BRCA1|STAT3|DDX3X|ZMYM5|IFNG|SP1|MDFIC|CREB1|ZNF367|ZNF366|STK3|DMRTC2|SNAI2|T	http://amigo.geneontology.org/amigo/term/GO:2001141
regulation of nucleic acid-templated transcription	Gene Ontology Slim	GO:1903506	242	1612	9.67546e-31	1.23987e-28	HIF3A|TRIM13|ZFX|SUMO1|KMT5A|ZBTB8A|PRMT6|CREBL2|SKIL|ARL2BP|MAP3K7|ETS2|LHX2|OTUD7B|CDC73|MAP3K2|ZNF148|RBPJ|CLOCK|THRB|RORB|RORA|CBFA2T2|KMT5B|CBFB|EGR1|SAP18|IRX5|LBH|COMMD7|BRCA1|STAT3|DDX3X|ZMYM5|IFNG|SP1|MDFIC|CREB1|ZNF367|ZNF366|STK3|DMRTC2|SNAI2|T	http://amigo.geneontology.org/amigo/term/GO:1903506
regulation of nucleic acid-templated transcription	Gene Ontology	GO:1903506	242	1612	9.67546e-31	1.23987e-28	HIF3A|TRIM13|ZFX|SUMO1|KMT5A|ZBTB8A|PRMT6|CREBL2|SKIL|ARL2BP|MAP3K7|ETS2|LHX2|OTUD7B|CDC73|MAP3K2|ZNF148|RBPJ|CLOCK|THRB|RORB|RORA|CBFA2T2|KMT5B|CBFB|EGR1|SAP18|IRX5|LBH|COMMD7|BRCA1|STAT3|DDX3X|ZMYM5|IFNG|SP1|MDFIC|CREB1|ZNF367|ZNF366|STK3|DMRTC2|SNAI2|T	http://amigo.geneontology.org/amigo/term/GO:1903506
regulation of RNA biosynthetic process	Gene Ontology	GO:2001141	242	1612	9.67546e-31	1.23987e-28	HIF3A|TRIM13|ZFX|SUMO1|KMT5A|ZBTB8A|PRMT6|CREBL2|SKIL|ARL2BP|MAP3K7|ETS2|LHX2|OTUD7B|CDC73|MAP3K2|ZNF148|RBPJ|CLOCK|THRB|RORB|RORA|CBFA2T2|KMT5B|CBFB|EGR1|SAP18|IRX5|LBH|COMMD7|BRCA1|STAT3|DDX3X|ZMYM5|IFNG|SP1|MDFIC|CREB1|ZNF367|ZNF366|STK3|DMRTC2|SNAI2|T	http://amigo.geneontology.org/amigo/term/GO:2001141
nucleic acid-templated transcription	Gene Ontology Slim	GO:0097659	248	1677	1.23806e-30	1.55818e-28	HIF3A|TRIM13|ZFX|SUMO1|KMT5A|ZBTB8A|PRMT6|CREBL2|POLR3A|SKIL|ARL2BP|MAP3K7|ETS2|LHX2|OTUD7B|CDC73|MAP3K2|ZNF148|RBPJ|CLOCK|THRB|RORB|RORA|CBFA2T2|KMT5B|CBFB|EGR1|SAP18|IRX5|LBH|COMMD7|BRCA1|STAT3|DDX3X|ZMYM5|IFNG|SP1|MDFIC|CREB1|ZNF367|ZNF366|STK3|DMRTC2|	http://amigo.geneontology.org/amigo/term/GO:0097659
nucleic acid-templated transcription	Gene Ontology	GO:0097659	248	1677	1.23806e-30	1.55818e-28	HIF3A|TRIM13|ZFX|SUMO1|KMT5A|ZBTB8A|PRMT6|CREBL2|POLR3A|SKIL|ARL2BP|MAP3K7|ETS2|LHX2|OTUD7B|CDC73|MAP3K2|ZNF148|RBPJ|CLOCK|THRB|RORB|RORA|CBFA2T2|KMT5B|CBFB|EGR1|SAP18|IRX5|LBH|COMMD7|BRCA1|STAT3|DDX3X|ZMYM5|IFNG|SP1|MDFIC|CREB1|ZNF367|ZNF366|STK3|DMRTC2|	http://amigo.geneontology.org/amigo/term/GO:0097659
cell differentiation	Gene Ontology Slim	GO:0030154	244	1645	2.6558e-30	3.28387e-28	BCL2L1|ERRFI1|COL11A1|HSPA2|IL6ST|FKBP4|HIPK1|GPM6A|CREBL2|CAPRIN1|BDNF|NKX2-1|CAV2|TRIM62|MSR1|IFNW1|CYP26B1|CDC73|FNDC5|RBPJ|DYNLT1|RORB|RORA|CBFA2T2|PLPP3|CBFB|IRX5|PTBP1|CDKN2B|STAT3|SLITRK2|SNAP25|IFNG|TMF1|CREB1|THRB|HOMER1|TNFRSF21|LPL|STK4|DMRTC2|	http://amigo.geneontology.org/amigo/term/GO:0030154
cell differentiation	Gene Ontology	GO:0030154	244	1645	2.6558e-30	3.28387e-28	BCL2L1|ERRFI1|COL11A1|HSPA2|IL6ST|FKBP4|HIPK1|GPM6A|CREBL2|CAPRIN1|BDNF|NKX2-1|CAV2|TRIM62|MSR1|IFNW1|CYP26B1|CDC73|FNDC5|RBPJ|DYNLT1|RORB|RORA|CBFA2T2|PLPP3|CBFB|IRX5|PTBP1|CDKN2B|STAT3|SLITRK2|SNAP25|IFNG|TMF1|CREB1|THRB|HOMER1|TNFRSF21|LPL|STK4|DMRTC2|	http://amigo.geneontology.org/amigo/term/GO:0030154
transcription, DNA-templated	Gene Ontology Slim	GO:0006351	245	1662	4.52836e-30	5.50274e-28	HIF3A|TRIM13|ZFX|SUMO1|KMT5A|ZBTB8A|PRMT6|CREBL2|POLR3A|SKIL|CCNT2|MAP3K7|ETS2|LHX2|OTUD7B|CDC73|MAP3K2|ZNF148|RBPJ|CLOCK|THRB|RORB|RORA|CBFA2T2|KMT5B|CBFB|EGR1|SAP18|IRX5|LBH|COMMD7|BRCA1|STAT3|DDX3X|ZMYM5|IFNG|SP1|MDFIC|CREB1|ZNF367|ZNF366|STK3|DMRTC2|S	http://amigo.geneontology.org/amigo/term/GO:0006351
transcription, DNA-templated	Gene Ontology	GO:0006351	245	1662	4.52836e-30	5.50274e-28	HIF3A|TRIM13|ZFX|SUMO1|KMT5A|ZBTB8A|PRMT6|CREBL2|POLR3A|SKIL|CCNT2|MAP3K7|ETS2|LHX2|OTUD7B|CDC73|MAP3K2|ZNF148|RBPJ|CLOCK|THRB|RORB|RORA|CBFA2T2|KMT5B|CBFB|EGR1|SAP18|IRX5|LBH|COMMD7|BRCA1|STAT3|DDX3X|ZMYM5|IFNG|SP1|MDFIC|CREB1|ZNF367|ZNF366|STK3|DMRTC2|S	http://amigo.geneontology.org/amigo/term/GO:0006351
regulation of transcription, DNA-templated	Gene Ontology Slim	GO:0006355	238	1593	5.97082e-30	7.1326e-28	HIF3A|TRIM13|ZFX|SUMO1|KMT5A|ZBTB8A|PRMT6|CREBL2|SKIL|CCNT2|MAP3K7|ETS2|LHX2|OTUD7B|CDC73|MAP3K2|ZNF148|RBPJ|CLOCK|THRB|RORB|RORA|CBFA2T2|KMT5B|CBFB|EGR1|SAP18|IRX5|LBH|COMMD7|BRCA1|STAT3|DDX3X|ZMYM5|IFNG|SP1|MDFIC|CREB1|ZNF367|ZNF366|STK3|DMRTC2|SNAI2|TH	http://amigo.geneontology.org/amigo/term/GO:0006355
regulation of transcription, DNA-templated	Gene Ontology	GO:0006355	238	1593	5.97082e-30	7.1326e-28	HIF3A|TRIM13|ZFX|SUMO1|KMT5A|ZBTB8A|PRMT6|CREBL2|SKIL|CCNT2|MAP3K7|ETS2|LHX2|OTUD7B|CDC73|MAP3K2|ZNF148|RBPJ|CLOCK|THRB|RORB|RORA|CBFA2T2|KMT5B|CBFB|EGR1|SAP18|IRX5|LBH|COMMD7|BRCA1|STAT3|DDX3X|ZMYM5|IFNG|SP1|MDFIC|CREB1|ZNF367|ZNF366|STK3|DMRTC2|SNAI2|TH	http://amigo.geneontology.org/amigo/term/GO:0006355
cellular response to stimulus	Gene Ontology Slim	GO:0051716	403	3449	7.11195e-30	8.35417e-28	ERRFI1|PGAP2|SCG2|IL6ST|HIPK3|HIPK1|IFNW1|RAB11A|OTUD7B|SMG1|CDC73|GPR180|CDC42SE2|COMMD7|IGF1R|IFNG|CPE|STK3|STK4|UBE4B|AKAP1|HCN1|BAK1|ANGPTL1|STK38L|YBX3|ARHGAP19|TNFSF11|ACVR1C|GABRG2|CELF4|UBE2D3|NDNF|PUM1|AKAP5|SOX17|WSB1|NFIL3|CHUK|SENP1|CUX2|VEGFA	http://amigo.geneontology.org/amigo/term/GO:0051716
cellular response to stimulus	Gene Ontology	GO:0051716	403	3449	7.11195e-30	8.35417e-28	ERRFI1|PGAP2|SCG2|IL6ST|HIPK3|HIPK1|IFNW1|RAB11A|OTUD7B|SMG1|CDC73|GPR180|CDC42SE2|COMMD7|IGF1R|IFNG|CPE|STK3|STK4|UBE4B|AKAP1|HCN1|BAK1|ANGPTL1|STK38L|YBX3|ARHGAP19|TNFSF11|ACVR1C|GABRG2|CELF4|UBE2D3|NDNF|PUM1|AKAP5|SOX17|WSB1|NFIL3|CHUK|SENP1|CUX2|VEGFA	http://amigo.geneontology.org/amigo/term/GO:0051716
gene expression	Gene Ontology Slim	GO:0010467	333	2641	1.447e-29	1.64313e-27	HIF3A|TRIM13|ZFX|DPH6|ZNF451|SUMO1|KMT5A|TSPAN14|CPE|UHMK1|PRMT6|ADAMTS2|FZD5|SRSF10|CREBL2|POLR3A|SLC25A17|RBM24|SKIL|CCNT2|MAP3K7|KLF7|LHX2|OTUD7B|SMG1|GIGYF2|ADAMTS3|CDC73|MAP3K2|ZNF148|RBPJ|CLOCK|THRB|RORB|RORA|CBFA2T2|KMT5B|ESRP1|PRKACB|PROX1|EGR1|SA	http://amigo.geneontology.org/amigo/term/GO:0010467
gene expression	Gene Ontology	GO:0010467	333	2641	1.447e-29	1.64313e-27	HIF3A|TRIM13|ZFX|DPH6|ZNF451|SUMO1|KMT5A|TSPAN14|CPE|UHMK1|PRMT6|ADAMTS2|FZD5|SRSF10|CREBL2|POLR3A|SLC25A17|RBM24|SKIL|CCNT2|MAP3K7|KLF7|LHX2|OTUD7B|SMG1|GIGYF2|ADAMTS3|CDC73|MAP3K2|ZNF148|RBPJ|CLOCK|THRB|RORB|RORA|CBFA2T2|KMT5B|ESRP1|PRKACB|PROX1|EGR1|SA	http://amigo.geneontology.org/amigo/term/GO:0010467
multicellular organismal process	Gene Ontology Slim	GO:0032501	375	3129	1.47489e-29	1.64313e-27	PGAP1|UBE2Q1|ERRFI1|SUMO1|SCG2|IL6ST|FKBP4|HIPK1|GPM6A|GPM6B|IFNW1|RAB11A|DLG3|OTUD7B|CDC73|ZNF706|IRX5|SLITRK6|SLITRK2|ZMYM5|IFNG|CPE|STK3|STK4|SMARCD1|CAPRIN1|UBE4B|STRBP|HCN1|BAK1|MAF|CSRP3|YBX3|IL7R|TNFSF11|ACTA1|ELAVL1|ACVR1C|CDKN1B|LSM14A|CELF4|CELF	http://amigo.geneontology.org/amigo/term/GO:0032501
multicellular organismal process	Gene Ontology	GO:0032501	375	3129	1.47489e-29	1.64313e-27	PGAP1|UBE2Q1|ERRFI1|SUMO1|SCG2|IL6ST|FKBP4|HIPK1|GPM6A|GPM6B|IFNW1|RAB11A|DLG3|OTUD7B|CDC73|ZNF706|IRX5|SLITRK6|SLITRK2|ZMYM5|IFNG|CPE|STK3|STK4|SMARCD1|CAPRIN1|UBE4B|STRBP|HCN1|BAK1|MAF|CSRP3|YBX3|IL7R|TNFSF11|ACTA1|ELAVL1|ACVR1C|CDKN1B|LSM14A|CELF4|CELF	http://amigo.geneontology.org/amigo/term/GO:0032501
protein modification process	Gene Ontology Slim	GO:0036211	263	1867	1.49206e-29	1.64313e-27	UBE2Q1|ERRFI1|TRIM13|PGAP2|RNF13|SUMO1|CDK16|KMT5A|SCG2|BMP2|DOLPP1|PPIL2|PPIL3|CREBL2|DPH6|CCNT2|CAV2|IFNG|GPR37|IFNW1|OTUD7B|SMG1|ASB7|PPP1R2|MAP3K2|CLOCK|PAQR3|PPME1|PROX1|KMT5B|SGK1|CBFB|UBR5|GOLGA7|PPP6C|WEE1|MTMR4|SETDB2|CDKN2B|IGF1R|HIPK3|DDIT4|WIP	http://amigo.geneontology.org/amigo/term/GO:0036211
cellular protein modification process	Gene Ontology Slim	GO:0006464	263	1867	1.49206e-29	1.64313e-27	UBE2Q1|ERRFI1|TRIM13|PGAP2|RNF13|SUMO1|CDK16|KMT5A|SCG2|BMP2|DOLPP1|PPIL2|PPIL3|CREBL2|DPH6|CCNT2|CAV2|IFNG|GPR37|IFNW1|OTUD7B|SMG1|ASB7|PPP1R2|MAP3K2|CLOCK|PAQR3|PPME1|PROX1|KMT5B|SGK1|CBFB|UBR5|GOLGA7|PPP6C|WEE1|MTMR4|SETDB2|CDKN2B|IGF1R|HIPK3|DDIT4|WIP	http://amigo.geneontology.org/amigo/term/GO:0006464
cellular protein modification process	Gene Ontology	GO:0006464	263	1867	1.49206e-29	1.64313e-27	UBE2Q1|ERRFI1|TRIM13|PGAP2|RNF13|SUMO1|CDK16|KMT5A|SCG2|BMP2|DOLPP1|PPIL2|PPIL3|CREBL2|DPH6|CCNT2|CAV2|IFNG|GPR37|IFNW1|OTUD7B|SMG1|ASB7|PPP1R2|MAP3K2|CLOCK|PAQR3|PPME1|PROX1|KMT5B|SGK1|CBFB|UBR5|GOLGA7|PPP6C|WEE1|MTMR4|SETDB2|CDKN2B|IGF1R|HIPK3|DDIT4|WIP	http://amigo.geneontology.org/amigo/term/GO:0006464
protein modification process	Gene Ontology	GO:0036211	263	1867	1.49206e-29	1.64313e-27	UBE2Q1|ERRFI1|TRIM13|PGAP2|RNF13|SUMO1|CDK16|KMT5A|SCG2|BMP2|DOLPP1|PPIL2|PPIL3|CREBL2|DPH6|CCNT2|CAV2|IFNG|GPR37|IFNW1|OTUD7B|SMG1|ASB7|PPP1R2|MAP3K2|CLOCK|PAQR3|PPME1|PROX1|KMT5B|SGK1|CBFB|UBR5|GOLGA7|PPP6C|WEE1|MTMR4|SETDB2|CDKN2B|IGF1R|HIPK3|DDIT4|WIP	http://amigo.geneontology.org/amigo/term/GO:0036211
positive regulation of macromolecule metabolic process	Gene Ontology Slim	GO:0010604	214	1368	2.94013e-29	3.18801e-27	HIF3A|SUMO1|FZD5|CREBL2|ARL2BP|CAV2|KITLG|GPR37|IFNW1|CDC73|MAP3K2|RBPJ|CLOCK|THRB|RORB|RORA|CBFA2T2|CBFB|LBH|BRCA1|IGF1R|CD28|DDX3X|IFNG|SP1|IRF2BPL|SMAD1|SERPINB9|STK3|STK4|PROM2|ARRDC3|SNAI2|THOC1|RNF19B|RNF19A|BMP7|BMP2|GPBP1|RFX4|CCND2|VIM|PSMC6|MAF|	http://amigo.geneontology.org/amigo/term/GO:0010604
positive regulation of macromolecule metabolic process	Gene Ontology	GO:0010604	214	1368	2.94013e-29	3.18801e-27	HIF3A|SUMO1|FZD5|CREBL2|ARL2BP|CAV2|KITLG|GPR37|IFNW1|CDC73|MAP3K2|RBPJ|CLOCK|THRB|RORB|RORA|CBFA2T2|CBFB|LBH|BRCA1|IGF1R|CD28|DDX3X|IFNG|SP1|IRF2BPL|SMAD1|SERPINB9|STK3|STK4|PROM2|ARRDC3|SNAI2|THOC1|RNF19B|RNF19A|BMP7|BMP2|GPBP1|RFX4|CCND2|VIM|PSMC6|MAF|	http://amigo.geneontology.org/amigo/term/GO:0010604
nucleobase-containing compound metabolic process	Gene Ontology Slim	GO:0006139	333	2654	3.24211e-29	3.46218e-27	HIF3A|TRIM13|ZFX|HMGCR|ZNF451|SUMO1|KMT5A|PPP4R2|UHMK1|PRMT6|PAN2|FZD5|SRSF10|CREBL2|POLR3A|SKIL|ARL2BP|MAP3K7|KLF7|LHX2|OTUD7B|SMG1|DCK|PROX1|CDC73|MAP3K2|ZNF148|RBPJ|CLOCK|THRB|RORB|RORA|CBFA2T2|DDIT4|KMT5B|ESRP1|CBFB|EGR1|SAP18|IRX5|LBH|MBNL2|COMMD7|PD	http://amigo.geneontology.org/amigo/term/GO:0006139
nucleobase-containing compound metabolic process	Gene Ontology	GO:0006139	333	2654	3.24211e-29	3.46218e-27	HIF3A|TRIM13|ZFX|HMGCR|ZNF451|SUMO1|KMT5A|PPP4R2|UHMK1|PRMT6|PAN2|FZD5|SRSF10|CREBL2|POLR3A|SKIL|ARL2BP|MAP3K7|KLF7|LHX2|OTUD7B|SMG1|DCK|PROX1|CDC73|MAP3K2|ZNF148|RBPJ|CLOCK|THRB|RORB|RORA|CBFA2T2|DDIT4|KMT5B|ESRP1|CBFB|EGR1|SAP18|IRX5|LBH|MBNL2|COMMD7|PD	http://amigo.geneontology.org/amigo/term/GO:0006139
signaling	Gene Ontology Slim	GO:0023052	362	2992	3.66706e-29	3.85753e-27	UBE2Q1|ERRFI1|PGAP2|CTNNA3|SCG2|IL6ST|HIPK3|HIPK1|IFNW1|RAB11A|DLG3|OTUD7B|CDC73|GPR180|CDC42SE2|COMMD7|NAPB|IGF1R|IFNG|CPE|STK3|STK4|AKAP5|AKAP1|BAK1|ANGPTL1|STK38L|YBX3|ARHGAP19|TNFSF11|ACVR1C|GABRG2|CELF4|NDNF|PUM1|SOX17|WSB1|CHUK|SENP1|CUX2|VEGFA|VEGF	http://amigo.geneontology.org/amigo/term/GO:0023052
signaling	Gene Ontology	GO:0023052	362	2992	3.66706e-29	3.85753e-27	UBE2Q1|ERRFI1|PGAP2|CTNNA3|SCG2|IL6ST|HIPK3|HIPK1|IFNW1|RAB11A|DLG3|OTUD7B|CDC73|GPR180|CDC42SE2|COMMD7|NAPB|IGF1R|IFNG|CPE|STK3|STK4|AKAP5|AKAP1|BAK1|ANGPTL1|STK38L|YBX3|ARHGAP19|TNFSF11|ACVR1C|GABRG2|CELF4|NDNF|PUM1|SOX17|WSB1|CHUK|SENP1|CUX2|VEGFA|VEGF	http://amigo.geneontology.org/amigo/term/GO:0023052
cellular component organization	Gene Ontology Slim	GO:0016043	330	2625	4.50759e-29	4.67198e-27	BCL2L1|CAND1|IGF1R|COL11A1|HSPA4|SUMO1|UVRAG|KMT5A|PLXNC1|KCNMA1|PRMT6|HIPK1|STX1B|GPM6A|SRSF10|POLR3A|DPH6|BDNF|NKX2-1|CAV2|RAB11A|TTC30B|CDC73|BRCA1|ADAMTS2|CLOCK|MPP7|MAP3K7|CBFA2T2|NAPG|KMT5B|UBR5|MKLN1|ACTC1|PDCL|ABCD3|HBS1L|MAPRE1|SETDB2|SLITRK6|CRI	http://amigo.geneontology.org/amigo/term/GO:0016043
cellular component organization	Gene Ontology	GO:0016043	330	2625	4.50759e-29	4.67198e-27	BCL2L1|CAND1|IGF1R|COL11A1|HSPA4|SUMO1|UVRAG|KMT5A|PLXNC1|KCNMA1|PRMT6|HIPK1|STX1B|GPM6A|SRSF10|POLR3A|DPH6|BDNF|NKX2-1|CAV2|RAB11A|TTC30B|CDC73|BRCA1|ADAMTS2|CLOCK|MPP7|MAP3K7|CBFA2T2|NAPG|KMT5B|UBR5|MKLN1|ACTC1|PDCL|ABCD3|HBS1L|MAPRE1|SETDB2|SLITRK6|CRI	http://amigo.geneontology.org/amigo/term/GO:0016043
nucleic acid metabolic process	Gene Ontology Slim	GO:0090304	311	2412	5.30183e-29	5.41555e-27	HIF3A|TRIM13|ZFX|ZNF451|SUMO1|KMT5A|PPP4R2|UHMK1|PRMT6|PAN2|FZD5|SRSF10|CREBL2|POLR3A|SKIL|ARL2BP|MAP3K7|ETS2|LHX2|OTUD7B|SMG1|PROX1|CDC73|MAP3K2|ZNF148|RBPJ|CLOCK|THRB|RORB|RORA|CBFA2T2|KMT5B|ESRP1|CBFB|EGR1|SAP18|IRX5|LBH|MBNL2|COMMD7|NABP1|ZBTB8A|STAT3	http://amigo.geneontology.org/amigo/term/GO:0090304
nucleic acid metabolic process	Gene Ontology	GO:0090304	311	2412	5.30183e-29	5.41555e-27	HIF3A|TRIM13|ZFX|ZNF451|SUMO1|KMT5A|PPP4R2|UHMK1|PRMT6|PAN2|FZD5|SRSF10|CREBL2|POLR3A|SKIL|ARL2BP|MAP3K7|ETS2|LHX2|OTUD7B|SMG1|PROX1|CDC73|MAP3K2|ZNF148|RBPJ|CLOCK|THRB|RORB|RORA|CBFA2T2|KMT5B|ESRP1|CBFB|EGR1|SAP18|IRX5|LBH|MBNL2|COMMD7|NABP1|ZBTB8A|STAT3	http://amigo.geneontology.org/amigo/term/GO:0090304
nucleobase-containing compound biosynthetic process	Gene Ontology Slim	GO:0034654	264	1898	6.66638e-29	6.7121e-27	HIF3A|TRIM13|ZFX|ZNF451|SUMO1|KMT5A|ZBTB8A|PRMT6|CREBL2|POLR3A|SKIL|ARL2BP|MAP3K7|KLF7|LHX2|OTUD7B|DCK|CDC73|MAP3K2|ZNF148|RBPJ|CLOCK|THRB|RORB|RORA|CBFA2T2|KMT5B|CBFB|EGR1|SAP18|IRX5|LBH|COMMD7|PDE4B|BRCA1|DLG3|DDX3X|ZMYM5|IFNG|SP1|MDFIC|CREB1|ZNF367|ZNF	http://amigo.geneontology.org/amigo/term/GO:0034654
nucleobase-containing compound biosynthetic process	Gene Ontology	GO:0034654	264	1898	6.66638e-29	6.7121e-27	HIF3A|TRIM13|ZFX|ZNF451|SUMO1|KMT5A|ZBTB8A|PRMT6|CREBL2|POLR3A|SKIL|ARL2BP|MAP3K7|KLF7|LHX2|OTUD7B|DCK|CDC73|MAP3K2|ZNF148|RBPJ|CLOCK|THRB|RORB|RORA|CBFA2T2|KMT5B|CBFB|EGR1|SAP18|IRX5|LBH|COMMD7|PDE4B|BRCA1|DLG3|DDX3X|ZMYM5|IFNG|SP1|MDFIC|CREB1|ZNF367|ZNF	http://amigo.geneontology.org/amigo/term/GO:0034654
cell communication	Gene Ontology Slim	GO:0007154	364	3029	8.0087e-29	7.95005e-27	UBE2Q1|ERRFI1|PGAP2|CTNNA3|SCG2|IL6ST|HIPK3|HIPK1|IFNW1|RAB11A|DLG3|OTUD7B|CDC73|GPR180|CDC42SE2|COMMD7|NAPB|IGF1R|IFNG|CPE|STK3|STK4|AKAP5|AKAP1|BAK1|ANGPTL1|STK38L|YBX3|ARHGAP19|TNFSF11|ACVR1C|GABRG2|CELF4|NDNF|PUM1|SOX17|WSB1|CHUK|SENP1|CUX2|VEGFA|VEGF	http://amigo.geneontology.org/amigo/term/GO:0007154
cell communication	Gene Ontology	GO:0007154	364	3029	8.0087e-29	7.95005e-27	UBE2Q1|ERRFI1|PGAP2|CTNNA3|SCG2|IL6ST|HIPK3|HIPK1|IFNW1|RAB11A|DLG3|OTUD7B|CDC73|GPR180|CDC42SE2|COMMD7|NAPB|IGF1R|IFNG|CPE|STK3|STK4|AKAP5|AKAP1|BAK1|ANGPTL1|STK38L|YBX3|ARHGAP19|TNFSF11|ACVR1C|GABRG2|CELF4|NDNF|PUM1|SOX17|WSB1|CHUK|SENP1|CUX2|VEGFA|VEGF	http://amigo.geneontology.org/amigo/term/GO:0007154
cellular component organization or biogenesis	Gene Ontology Slim	GO:0071840	339	2743	1.09679e-28	1.07321e-26	BCL2L1|CAND1|IGF1R|COL11A1|HSPA4|SUMO1|UVRAG|KMT5A|PLXNC1|KCNMA1|PRMT6|GOPC|HIPK1|STX1B|GPM6A|SRSF10|POLR3A|DPH6|BDNF|NKX2-1|CAV2|RAB11A|TTC30B|CDC73|BRCA1|ADAMTS2|CLOCK|MPP7|MAP3K7|CBFA2T2|NAPG|KMT5B|UBR5|MKLN1|ACTC1|PDCL|ABCD3|HBS1L|MAPRE1|SETDB2|SLITRK	http://amigo.geneontology.org/amigo/term/GO:0071840
cellular component organization or biogenesis	Gene Ontology	GO:0071840	339	2743	1.09679e-28	1.07321e-26	BCL2L1|CAND1|IGF1R|COL11A1|HSPA4|SUMO1|UVRAG|KMT5A|PLXNC1|KCNMA1|PRMT6|GOPC|HIPK1|STX1B|GPM6A|SRSF10|POLR3A|DPH6|BDNF|NKX2-1|CAV2|RAB11A|TTC30B|CDC73|BRCA1|ADAMTS2|CLOCK|MPP7|MAP3K7|CBFA2T2|NAPG|KMT5B|UBR5|MKLN1|ACTC1|PDCL|ABCD3|HBS1L|MAPRE1|SETDB2|SLITRK	http://amigo.geneontology.org/amigo/term/GO:0071840
macromolecule modification	Gene Ontology Slim	GO:0043412	269	1959	1.11158e-28	1.07321e-26	UBE2Q1|ERRFI1|TRIM13|PGAP2|RNF13|SUMO1|CDK16|KMT5A|SCG2|BMP2|DOLPP1|PPIL2|PPIL3|CREBL2|DPH6|CCNT2|CAV2|IFNG|GPR37|IFNW1|OTUD7B|SMG1|ASB7|PPP1R2|MAP3K2|CLOCK|PAQR3|PPME1|PROX1|KMT5B|SGK1|CBFB|UBR5|GOLGA7|PPP6C|WEE1|MTMR4|TDG|SETDB2|CDKN2B|IGF1R|HIPK3|DDIT4	http://amigo.geneontology.org/amigo/term/GO:0043412
macromolecule modification	Gene Ontology	GO:0043412	269	1959	1.11158e-28	1.07321e-26	UBE2Q1|ERRFI1|TRIM13|PGAP2|RNF13|SUMO1|CDK16|KMT5A|SCG2|BMP2|DOLPP1|PPIL2|PPIL3|CREBL2|DPH6|CCNT2|CAV2|IFNG|GPR37|IFNW1|OTUD7B|SMG1|ASB7|PPP1R2|MAP3K2|CLOCK|PAQR3|PPME1|PROX1|KMT5B|SGK1|CBFB|UBR5|GOLGA7|PPP6C|WEE1|MTMR4|TDG|SETDB2|CDKN2B|IGF1R|HIPK3|DDIT4	http://amigo.geneontology.org/amigo/term/GO:0043412
aromatic compound biosynthetic process	Gene Ontology Slim	GO:0019438	268	1949	1.1787e-28	1.12263e-26	HIF3A|TRIM13|ZFX|ZNF451|SUMO1|KMT5A|ZBTB8A|PRMT6|CREBL2|POLR3A|SKIL|ARL2BP|MAP3K7|GPR37|KLF7|LHX2|OTUD7B|DCK|CDC73|MAP3K2|ZNF148|RBPJ|CLOCK|THRB|RORB|RORA|CBFA2T2|KMT5B|CBFB|EGR1|SAP18|IRX5|LBH|COMMD7|PDE4B|BRCA1|DLG3|DDX3X|ZMYM5|IFNG|SP1|MDFIC|CREB1|ZNF3	http://amigo.geneontology.org/amigo/term/GO:0019438
aromatic compound biosynthetic process	Gene Ontology	GO:0019438	268	1949	1.1787e-28	1.12263e-26	HIF3A|TRIM13|ZFX|ZNF451|SUMO1|KMT5A|ZBTB8A|PRMT6|CREBL2|POLR3A|SKIL|ARL2BP|MAP3K7|GPR37|KLF7|LHX2|OTUD7B|DCK|CDC73|MAP3K2|ZNF148|RBPJ|CLOCK|THRB|RORB|RORA|CBFA2T2|KMT5B|CBFB|EGR1|SAP18|IRX5|LBH|COMMD7|PDE4B|BRCA1|DLG3|DDX3X|ZMYM5|IFNG|SP1|MDFIC|CREB1|ZNF3	http://amigo.geneontology.org/amigo/term/GO:0019438
cellular aromatic compound metabolic process	Gene Ontology Slim	GO:0006725	340	2758	1.3484e-28	1.26713e-26	HIF3A|TRIM13|ZFX|HMGCR|ZNF451|SUMO1|KMT5A|PPP4R2|UHMK1|PRMT6|PAN2|FZD5|SRSF10|CREBL2|POLR3A|PAH|SKIL|ARL2BP|MAP3K7|GPR37|KLF7|LHX2|OTUD7B|SMG1|DCK|PROX1|CDC73|MAP3K2|ZNF148|RBPJ|CLOCK|THRB|RORB|RORA|CBFA2T2|DDIT4|KMT5B|ESRP1|CBFB|EGR1|SAP18|IRX5|LBH|MBNL2	http://amigo.geneontology.org/amigo/term/GO:0006725
cellular aromatic compound metabolic process	Gene Ontology	GO:0006725	340	2758	1.3484e-28	1.26713e-26	HIF3A|TRIM13|ZFX|HMGCR|ZNF451|SUMO1|KMT5A|PPP4R2|UHMK1|PRMT6|PAN2|FZD5|SRSF10|CREBL2|POLR3A|PAH|SKIL|ARL2BP|MAP3K7|GPR37|KLF7|LHX2|OTUD7B|SMG1|DCK|PROX1|CDC73|MAP3K2|ZNF148|RBPJ|CLOCK|THRB|RORB|RORA|CBFA2T2|DDIT4|KMT5B|ESRP1|CBFB|EGR1|SAP18|IRX5|LBH|MBNL2	http://amigo.geneontology.org/amigo/term/GO:0006725
cellular nitrogen compound metabolic process	Gene Ontology Slim	GO:0034641	372	3147	3.02184e-28	2.80236e-26	HIF3A|SUMO1|CPE|HIPK3|SRSF10|LHX2|OTUD7B|SMG1|CDC73|ZNF706|SPTLC2|SPTLC1|IRX5|HBS1L|WDR3|ZMYM5|IFNG|SP1|MDFIC|STK3|ERI2|MAF|ATMIN|CSRP3|YBX3|TNFSF11|ELAVL1|CDKN1B|LSM14A|CAPRIN1|UBE2D3|CELF1|PUM1|TPK1|ZNF451|BMS1|TADA2B|SOX17|NFIL3|FOXJ2|HOXB3|DLG3|SENP1|	http://amigo.geneontology.org/amigo/term/GO:0034641
cellular nitrogen compound metabolic process	Gene Ontology	GO:0034641	372	3147	3.02184e-28	2.80236e-26	HIF3A|SUMO1|CPE|HIPK3|SRSF10|LHX2|OTUD7B|SMG1|CDC73|ZNF706|SPTLC2|SPTLC1|IRX5|HBS1L|WDR3|ZMYM5|IFNG|SP1|MDFIC|STK3|ERI2|MAF|ATMIN|CSRP3|YBX3|TNFSF11|ELAVL1|CDKN1B|LSM14A|CAPRIN1|UBE2D3|CELF1|PUM1|TPK1|ZNF451|BMS1|TADA2B|SOX17|NFIL3|FOXJ2|HOXB3|DLG3|SENP1|	http://amigo.geneontology.org/amigo/term/GO:0034641
heterocycle metabolic process	Gene Ontology Slim	GO:0046483	337	2739	3.44438e-28	3.15273e-26	HIF3A|TRIM13|ZFX|HMGCR|ZNF451|SUMO1|KMT5A|PPP4R2|UHMK1|PRMT6|PAN2|FZD5|SRSF10|CREBL2|POLR3A|SKIL|ARL2BP|MAP3K7|KLF7|LHX2|OTUD7B|SMG1|DCK|PROX1|CDC73|MAP3K2|ZNF148|RBPJ|CLOCK|THRB|RORB|RORA|CBFA2T2|DDIT4|KMT5B|ESRP1|CBFB|EGR1|SAP18|IRX5|LBH|MBNL2|COMMD7|PD	http://amigo.geneontology.org/amigo/term/GO:0046483
heterocycle metabolic process	Gene Ontology	GO:0046483	337	2739	3.44438e-28	3.15273e-26	HIF3A|TRIM13|ZFX|HMGCR|ZNF451|SUMO1|KMT5A|PPP4R2|UHMK1|PRMT6|PAN2|FZD5|SRSF10|CREBL2|POLR3A|SKIL|ARL2BP|MAP3K7|KLF7|LHX2|OTUD7B|SMG1|DCK|PROX1|CDC73|MAP3K2|ZNF148|RBPJ|CLOCK|THRB|RORB|RORA|CBFA2T2|DDIT4|KMT5B|ESRP1|CBFB|EGR1|SAP18|IRX5|LBH|MBNL2|COMMD7|PD	http://amigo.geneontology.org/amigo/term/GO:0046483
heterocycle biosynthetic process	Gene Ontology Slim	GO:0018130	266	1951	6.34027e-28	5.729e-26	HIF3A|TRIM13|ZFX|ZNF451|SUMO1|KMT5A|ZBTB8A|PRMT6|CREBL2|POLR3A|SKIL|ARL2BP|MAP3K7|KLF7|LHX2|OTUD7B|DCK|CDC73|MAP3K2|ZNF148|RBPJ|CLOCK|THRB|RORB|RORA|CBFA2T2|KMT5B|CBFB|EGR1|SAP18|IRX5|LBH|COMMD7|PDE4B|BRCA1|DLG3|DDX3X|ZMYM5|IFNG|SP1|MDFIC|CREB1|ZNF367|ZNF	http://amigo.geneontology.org/amigo/term/GO:0018130
heterocycle biosynthetic process	Gene Ontology	GO:0018130	266	1951	6.34027e-28	5.729e-26	HIF3A|TRIM13|ZFX|ZNF451|SUMO1|KMT5A|ZBTB8A|PRMT6|CREBL2|POLR3A|SKIL|ARL2BP|MAP3K7|KLF7|LHX2|OTUD7B|DCK|CDC73|MAP3K2|ZNF148|RBPJ|CLOCK|THRB|RORB|RORA|CBFA2T2|KMT5B|CBFB|EGR1|SAP18|IRX5|LBH|COMMD7|PDE4B|BRCA1|DLG3|DDX3X|ZMYM5|IFNG|SP1|MDFIC|CREB1|ZNF367|ZNF	http://amigo.geneontology.org/amigo/term/GO:0018130
positive regulation of metabolic process	Gene Ontology Slim	GO:0009893	224	1507	6.80057e-28	6.06714e-26	HIF3A|TRIM13|SUMO1|FZD5|CREBL2|ARL2BP|CAV2|KITLG|GPR37|IFNW1|PROX1|CDC73|MAP3K2|RBPJ|CLOCK|THRB|RORB|RORA|CBFA2T2|CBFB|SPTLC1|LBH|BRCA1|IGF1R|CD28|DDX3X|IFNG|SP1|IRF2BPL|SMAD1|SERPINB9|STK3|STK4|PROM2|ARRDC3|SNAI2|THOC1|RNF19B|RNF19A|BMP7|SCOC|BMP2|GPBP1|	http://amigo.geneontology.org/amigo/term/GO:0009893
positive regulation of metabolic process	Gene Ontology	GO:0009893	224	1507	6.80057e-28	6.06714e-26	HIF3A|TRIM13|SUMO1|FZD5|CREBL2|ARL2BP|CAV2|KITLG|GPR37|IFNW1|PROX1|CDC73|MAP3K2|RBPJ|CLOCK|THRB|RORB|RORA|CBFA2T2|CBFB|SPTLC1|LBH|BRCA1|IGF1R|CD28|DDX3X|IFNG|SP1|IRF2BPL|SMAD1|SERPINB9|STK3|STK4|PROM2|ARRDC3|SNAI2|THOC1|RNF19B|RNF19A|BMP7|SCOC|BMP2|GPBP1|	http://amigo.geneontology.org/amigo/term/GO:0009893
organic cyclic compound biosynthetic process	Gene Ontology Slim	GO:1901362	272	2019	7.60651e-28	6.70133e-26	HIF3A|TRIM13|ZFX|HMGCR|ZNF451|SUMO1|IDI1|KMT5A|ZBTB8A|PRMT6|CREBL2|POLR3A|SKIL|ARL2BP|MAP3K7|GPR37|KLF7|LHX2|OTUD7B|DCK|CDC73|MAP3K2|ZNF148|RBPJ|CLOCK|THRB|RORB|RORA|CBFA2T2|KMT5B|CBFB|EGR1|SAP18|IRX5|LBH|COMMD7|PDE4B|BRCA1|DLG3|DDX3X|ZMYM5|IFNG|SP1|MDFIC	http://amigo.geneontology.org/amigo/term/GO:1901362
organic cyclic compound biosynthetic process	Gene Ontology	GO:1901362	272	2019	7.60651e-28	6.70133e-26	HIF3A|TRIM13|ZFX|HMGCR|ZNF451|SUMO1|IDI1|KMT5A|ZBTB8A|PRMT6|CREBL2|POLR3A|SKIL|ARL2BP|MAP3K7|GPR37|KLF7|LHX2|OTUD7B|DCK|CDC73|MAP3K2|ZNF148|RBPJ|CLOCK|THRB|RORB|RORA|CBFA2T2|KMT5B|CBFB|EGR1|SAP18|IRX5|LBH|COMMD7|PDE4B|BRCA1|DLG3|DDX3X|ZMYM5|IFNG|SP1|MDFIC	http://amigo.geneontology.org/amigo/term/GO:1901362
organic cyclic compound metabolic process	Gene Ontology Slim	GO:1901360	345	2854	1.2479e-27	1.08582e-25	HIF3A|SUMO1|HIPK3|SRSF10|LHX2|OTUD7B|SMG1|CDC73|COMMD7|IRX5|WDR3|ZMYM5|IFNG|SP1|MDFIC|STK3|ERI2|MAF|ATMIN|CSRP3|FDX1|YBX3|TNFSF11|ELAVL1|CDKN1B|CELF4|UBE2D3|CELF1|PUM1|TPK1|ZNF451|BMS1|TADA2B|SOX17|NFIL3|FOXJ2|HOXB3|DLG3|SENP1|PPP1R10|CUX2|INSIG1|ZEB1|ING	http://amigo.geneontology.org/amigo/term/GO:1901360
organic cyclic compound metabolic process	Gene Ontology	GO:1901360	345	2854	1.2479e-27	1.08582e-25	HIF3A|SUMO1|HIPK3|SRSF10|LHX2|OTUD7B|SMG1|CDC73|COMMD7|IRX5|WDR3|ZMYM5|IFNG|SP1|MDFIC|STK3|ERI2|MAF|ATMIN|CSRP3|FDX1|YBX3|TNFSF11|ELAVL1|CDKN1B|CELF4|UBE2D3|CELF1|PUM1|TPK1|ZNF451|BMS1|TADA2B|SOX17|NFIL3|FOXJ2|HOXB3|DLG3|SENP1|PPP1R10|CUX2|INSIG1|ZEB1|ING	http://amigo.geneontology.org/amigo/term/GO:1901360
cellular nitrogen compound biosynthetic process	Gene Ontology Slim	GO:0044271	303	2372	1.31446e-27	1.1298e-25	HIF3A|TRIM13|ZFX|DPH6|ZNF451|SUMO1|KMT5A|ZBTB8A|PRMT6|FZD5|CREBL2|POLR3A|SLC25A17|SLC25A16|SKIL|ARL2BP|MRPS14|MAP3K7|KLF7|LHX2|OTUD7B|DCK|CDC73|MAP3K2|ZNF148|RBPJ|CLOCK|THRB|RORB|RORA|CBFA2T2|KMT5B|CBFB|SPTLC2|EGR1|SAP18|SPTLC1|IRX5|LBH|HBS1L|SLC25A12|PDE	http://amigo.geneontology.org/amigo/term/GO:0044271
cellular nitrogen compound biosynthetic process	Gene Ontology	GO:0044271	303	2372	1.31446e-27	1.1298e-25	HIF3A|TRIM13|ZFX|DPH6|ZNF451|SUMO1|KMT5A|ZBTB8A|PRMT6|FZD5|CREBL2|POLR3A|SLC25A17|SLC25A16|SKIL|ARL2BP|MRPS14|MAP3K7|KLF7|LHX2|OTUD7B|DCK|CDC73|MAP3K2|ZNF148|RBPJ|CLOCK|THRB|RORB|RORA|CBFA2T2|KMT5B|CBFB|SPTLC2|EGR1|SAP18|SPTLC1|IRX5|LBH|HBS1L|SLC25A12|PDE	http://amigo.geneontology.org/amigo/term/GO:0044271
RNA metabolic process	Gene Ontology Slim	GO:0016070	285	2172	1.46413e-27	1.24328e-25	HIF3A|TRIM13|ZFX|ZNF451|SUMO1|KMT5A|UHMK1|PRMT6|FZD5|SRSF10|CREBL2|POLR3A|SKIL|ARL2BP|MAP3K7|ETS2|LHX2|OTUD7B|SMG1|PROX1|CDC73|MAP3K2|ZNF148|RBPJ|CLOCK|THRB|RORB|RORA|CBFA2T2|KMT5B|ESRP1|CBFB|EGR1|SAP18|IRX5|LBH|MBNL2|COMMD7|ZBTB8A|STAT3|DDX3X|ZMYM5|IFNG|	http://amigo.geneontology.org/amigo/term/GO:0016070
RNA metabolic process	Gene Ontology	GO:0016070	285	2172	1.46413e-27	1.24328e-25	HIF3A|TRIM13|ZFX|ZNF451|SUMO1|KMT5A|UHMK1|PRMT6|FZD5|SRSF10|CREBL2|POLR3A|SKIL|ARL2BP|MAP3K7|ETS2|LHX2|OTUD7B|SMG1|PROX1|CDC73|MAP3K2|ZNF148|RBPJ|CLOCK|THRB|RORB|RORA|CBFA2T2|KMT5B|ESRP1|CBFB|EGR1|SAP18|IRX5|LBH|MBNL2|COMMD7|ZBTB8A|STAT3|DDX3X|ZMYM5|IFNG|	http://amigo.geneontology.org/amigo/term/GO:0016070
positive regulation of gene expression	Gene Ontology Slim	GO:0010628	149	799	4.56293e-27	3.82851e-25	HIF3A|CREBL2|CCNT2|CDC73|MAP3K2|RBPJ|CLOCK|THRB|RORB|RORA|CBFA2T2|CBFB|LBH|BRCA1|DDX3X|IFNG|SP1|IRF2BPL|SERPINB9|THOC1|BMP7|BMP2|GPBP1|RFX4|VIM|MAF|ATMIN|CSRP3|LMO2|IL7R|DMRT1|TNFSF11|FOXP1|ELAVL1|GLIS2|CELF4|FOXJ2|MED1|NEK4|NKX2-1|HSPH1|CHD6|EGR2|UBE3A|P	http://amigo.geneontology.org/amigo/term/GO:0010628
positive regulation of gene expression	Gene Ontology	GO:0010628	149	799	4.56293e-27	3.82851e-25	HIF3A|CREBL2|CCNT2|CDC73|MAP3K2|RBPJ|CLOCK|THRB|RORB|RORA|CBFA2T2|CBFB|LBH|BRCA1|DDX3X|IFNG|SP1|IRF2BPL|SERPINB9|THOC1|BMP7|BMP2|GPBP1|RFX4|VIM|MAF|ATMIN|CSRP3|LMO2|IL7R|DMRT1|TNFSF11|FOXP1|ELAVL1|GLIS2|CELF4|FOXJ2|MED1|NEK4|NKX2-1|HSPH1|CHD6|EGR2|UBE3A|P	http://amigo.geneontology.org/amigo/term/GO:0010628
positive regulation of nitrogen compound metabolic process	Gene Ontology Slim	GO:0051173	203	1320	6.4732e-27	5.36743e-25	HIF3A|SUMO1|FZD5|CREBL2|ARL2BP|CAV2|KITLG|GPR37|IFNW1|CDC73|MAP3K2|RBPJ|CLOCK|THRB|RORB|RORA|CBFA2T2|CBFB|LBH|BRCA1|IGF1R|CD28|DDX3X|IFNG|SP1|IRF2BPL|SMAD1|STK3|STK4|PROM2|ARRDC3|SNAI2|THOC1|RNF19B|RNF19A|BMP7|BMP2|GPBP1|RFX4|ACSL3|CCND2|BAK1|PSMC6|MAF|AT	http://amigo.geneontology.org/amigo/term/GO:0051173
positive regulation of nitrogen compound metabolic process	Gene Ontology	GO:0051173	203	1320	6.4732e-27	5.36743e-25	HIF3A|SUMO1|FZD5|CREBL2|ARL2BP|CAV2|KITLG|GPR37|IFNW1|CDC73|MAP3K2|RBPJ|CLOCK|THRB|RORB|RORA|CBFA2T2|CBFB|LBH|BRCA1|IGF1R|CD28|DDX3X|IFNG|SP1|IRF2BPL|SMAD1|STK3|STK4|PROM2|ARRDC3|SNAI2|THOC1|RNF19B|RNF19A|BMP7|BMP2|GPBP1|RFX4|ACSL3|CCND2|BAK1|PSMC6|MAF|AT	http://amigo.geneontology.org/amigo/term/GO:0051173
positive regulation of cellular metabolic process	Gene Ontology Slim	GO:0031325	212	1425	1.94808e-26	1.59652e-24	HIF3A|TRIM13|SUMO1|FZD5|CREBL2|ARL2BP|CAV2|KITLG|GPR37|IFNW1|CDC73|MAP3K2|RBPJ|CLOCK|THRB|RORB|RORA|CBFA2T2|CBFB|SPTLC1|LBH|BRCA1|IGF1R|CD28|DDX3X|IFNG|SP1|IRF2BPL|SMAD1|STK3|STK4|PROM2|ARRDC3|SNAI2|THOC1|RNF19B|RNF19A|BMP7|SCOC|BMP2|GPBP1|RFX4|ACSL3|CCND	http://amigo.geneontology.org/amigo/term/GO:0031325
positive regulation of cellular metabolic process	Gene Ontology	GO:0031325	212	1425	1.94808e-26	1.59652e-24	HIF3A|TRIM13|SUMO1|FZD5|CREBL2|ARL2BP|CAV2|KITLG|GPR37|IFNW1|CDC73|MAP3K2|RBPJ|CLOCK|THRB|RORB|RORA|CBFA2T2|CBFB|SPTLC1|LBH|BRCA1|IGF1R|CD28|DDX3X|IFNG|SP1|IRF2BPL|SMAD1|STK3|STK4|PROM2|ARRDC3|SNAI2|THOC1|RNF19B|RNF19A|BMP7|SCOC|BMP2|GPBP1|RFX4|ACSL3|CCND	http://amigo.geneontology.org/amigo/term/GO:0031325
organonitrogen compound metabolic process	Gene Ontology Slim	GO:1901564	383	3357	2.0229e-26	1.63878e-24	UBE2Q1|ERRFI1|PGAP2|RNF13|SUMO1|SCG2|RIC1|P4HA2|HIPK1|IFNW1|DLG3|OTUD7B|SMG1|CDC73|N6AMT1|SPTLC2|SPTLC1|WEE1|HBS1L|IGF1R|WIPI2|CPE|STK3|STK4|UBE4B|CCND2|BAK1|STK38L|TNFSF11|ELAVL1|ACVR1C|CDKN1B|LSM14A|UBE2D3|NDNF|PUM1|TPK1|AK4|PANK3|ENPP4|TADA2B|SOX17|WSB	http://amigo.geneontology.org/amigo/term/GO:1901564
organonitrogen compound metabolic process	Gene Ontology	GO:1901564	383	3357	2.0229e-26	1.63878e-24	UBE2Q1|ERRFI1|PGAP2|RNF13|SUMO1|SCG2|RIC1|P4HA2|HIPK1|IFNW1|DLG3|OTUD7B|SMG1|CDC73|N6AMT1|SPTLC2|SPTLC1|WEE1|HBS1L|IGF1R|WIPI2|CPE|STK3|STK4|UBE4B|CCND2|BAK1|STK38L|TNFSF11|ELAVL1|ACVR1C|CDKN1B|LSM14A|UBE2D3|NDNF|PUM1|TPK1|AK4|PANK3|ENPP4|TADA2B|SOX17|WSB	http://amigo.geneontology.org/amigo/term/GO:1901564
positive regulation of RNA metabolic process	Gene Ontology Slim	GO:0051254	141	741	2.13698e-26	1.71153e-24	HIF3A|CREBL2|ARL2BP|CDC73|MAP3K2|RBPJ|CLOCK|THRB|RORB|RORA|CBFA2T2|CBFB|LBH|BRCA1|DDX3X|IFNG|SP1|IRF2BPL|SMAD1|THOC1|BMP7|BMP2|GPBP1|RFX4|MAF|ATMIN|CSRP3|LMO2|DMRT1|TNFSF11|FOXP1|GLIS2|CELF4|FOXJ2|PUM1|BTG2|NEK4|CCNT2|HSPH1|CHD6|EGR2|TADA2B|UBE3A|PPARGC1A	http://amigo.geneontology.org/amigo/term/GO:0051254
positive regulation of RNA metabolic process	Gene Ontology	GO:0051254	141	741	2.13698e-26	1.71153e-24	HIF3A|CREBL2|ARL2BP|CDC73|MAP3K2|RBPJ|CLOCK|THRB|RORB|RORA|CBFA2T2|CBFB|LBH|BRCA1|DDX3X|IFNG|SP1|IRF2BPL|SMAD1|THOC1|BMP7|BMP2|GPBP1|RFX4|MAF|ATMIN|CSRP3|LMO2|DMRT1|TNFSF11|FOXP1|GLIS2|CELF4|FOXJ2|PUM1|BTG2|NEK4|CCNT2|HSPH1|CHD6|EGR2|TADA2B|UBE3A|PPARGC1A	http://amigo.geneontology.org/amigo/term/GO:0051254
positive regulation of macromolecule biosynthetic process	Gene Ontology Slim	GO:0010557	147	797	2.72592e-26	2.15868e-24	HIF3A|CREBL2|ARL2BP|KITLG|CDC73|MAP3K2|RBPJ|CLOCK|THRB|RORB|RORA|CBFA2T2|CBFB|LBH|BRCA1|CD28|DDX3X|IFNG|SP1|IRF2BPL|SMAD1|THOC1|BMP7|BMP2|GPBP1|RFX4|MAF|ATMIN|CSRP3|LMO2|DMRT1|TNFSF11|FOXP1|ELAVL1|GLIS2|FOXJ2|MED1|NEK4|CCNT2|HSPH1|CHD6|EGR2|TADA2B|UBE3A|P	http://amigo.geneontology.org/amigo/term/GO:0010557
positive regulation of macromolecule biosynthetic process	Gene Ontology	GO:0010557	147	797	2.72592e-26	2.15868e-24	HIF3A|CREBL2|ARL2BP|KITLG|CDC73|MAP3K2|RBPJ|CLOCK|THRB|RORB|RORA|CBFA2T2|CBFB|LBH|BRCA1|CD28|DDX3X|IFNG|SP1|IRF2BPL|SMAD1|THOC1|BMP7|BMP2|GPBP1|RFX4|MAF|ATMIN|CSRP3|LMO2|DMRT1|TNFSF11|FOXP1|ELAVL1|GLIS2|FOXJ2|MED1|NEK4|CCNT2|HSPH1|CHD6|EGR2|TADA2B|UBE3A|P	http://amigo.geneontology.org/amigo/term/GO:0010557
protein metabolic process	Gene Ontology Slim	GO:0019538	342	2881	4.23508e-26	3.28027e-24	UBE2Q1|ERRFI1|PGAP2|RNF13|SUMO1|SCG2|RIC1|P4HA2|HIPK1|IFNW1|OTUD7B|SMG1|CDC73|N6AMT1|WEE1|HBS1L|IGF1R|IFNG|CPE|STK3|STK4|UBE4B|CCND2|BAK1|STK38L|TNFSF11|ELAVL1|ACVR1C|CDKN1B|LSM14A|UBE2D3|NDNF|PUM1|TADA2B|SOX17|WSB1|EREG|RNF44|SENP5|CHUK|SENP1|VEGFA|VEGFC	http://amigo.geneontology.org/amigo/term/GO:0019538
protein metabolic process	Gene Ontology	GO:0019538	342	2881	4.23508e-26	3.28027e-24	UBE2Q1|ERRFI1|PGAP2|RNF13|SUMO1|SCG2|RIC1|P4HA2|HIPK1|IFNW1|OTUD7B|SMG1|CDC73|N6AMT1|WEE1|HBS1L|IGF1R|IFNG|CPE|STK3|STK4|UBE4B|CCND2|BAK1|STK38L|TNFSF11|ELAVL1|ACVR1C|CDKN1B|LSM14A|UBE2D3|NDNF|PUM1|TADA2B|SOX17|WSB1|EREG|RNF44|SENP5|CHUK|SENP1|VEGFA|VEGFC	http://amigo.geneontology.org/amigo/term/GO:0019538
regulation of multicellular organismal process	Gene Ontology Slim	GO:0051239	184	1152	4.2353e-26	3.28027e-24	ERRFI1|SUMO1|IL6ST|FKBP4|GPM6B|BDNF|NKX2-1|KITLG|OTUD7B|CDC73|RBPJ|THRB|RORB|RORA|CBFA2T2|IRX5|LBH|SLITRK6|CD28|SLITRK2|KCNJ2|IFNG|MTM1|TMF1|ACVR1C|TNFRSF21|STK3|STK4|ARRDC3|SNAI2|THOC1|CHSY1|BMP7|SNAP25|BMP2|RFX4|NPY1R|SYT4|VIM|RNF6|CSRP3|YBX3|IL7R|TNFSF	http://amigo.geneontology.org/amigo/term/GO:0051239
regulation of multicellular organismal process	Gene Ontology	GO:0051239	184	1152	4.2353e-26	3.28027e-24	ERRFI1|SUMO1|IL6ST|FKBP4|GPM6B|BDNF|NKX2-1|KITLG|OTUD7B|CDC73|RBPJ|THRB|RORB|RORA|CBFA2T2|IRX5|LBH|SLITRK6|CD28|SLITRK2|KCNJ2|IFNG|MTM1|TMF1|ACVR1C|TNFRSF21|STK3|STK4|ARRDC3|SNAI2|THOC1|CHSY1|BMP7|SNAP25|BMP2|RFX4|NPY1R|SYT4|VIM|RNF6|CSRP3|YBX3|IL7R|TNFSF	http://amigo.geneontology.org/amigo/term/GO:0051239
positive regulation of biosynthetic process	Gene Ontology Slim	GO:0009891	151	839	4.96258e-26	3.80177e-24	HIF3A|CREBL2|ARL2BP|KITLG|CDC73|MAP3K2|RBPJ|CLOCK|THRB|RORB|RORA|CBFA2T2|CBFB|LBH|BRCA1|CD28|DDX3X|IFNG|SP1|IRF2BPL|SMAD1|THOC1|BMP7|BMP2|GPBP1|RFX4|ACSL3|MID1IP1|MAF|ATMIN|CSRP3|LMO2|DMRT1|TNFSF11|FOXP1|ELAVL1|GLIS2|FOXJ2|MED1|NEK4|CCNT2|HSPH1|CHD6|EGR2|	http://amigo.geneontology.org/amigo/term/GO:0009891
positive regulation of biosynthetic process	Gene Ontology	GO:0009891	151	839	4.96258e-26	3.80177e-24	HIF3A|CREBL2|ARL2BP|KITLG|CDC73|MAP3K2|RBPJ|CLOCK|THRB|RORB|RORA|CBFA2T2|CBFB|LBH|BRCA1|CD28|DDX3X|IFNG|SP1|IRF2BPL|SMAD1|THOC1|BMP7|BMP2|GPBP1|RFX4|ACSL3|MID1IP1|MAF|ATMIN|CSRP3|LMO2|DMRT1|TNFSF11|FOXP1|ELAVL1|GLIS2|FOXJ2|MED1|NEK4|CCNT2|HSPH1|CHD6|EGR2|	http://amigo.geneontology.org/amigo/term/GO:0009891
positive regulation of cellular biosynthetic process	Gene Ontology Slim	GO:0031328	149	821	5.13801e-26	3.89384e-24	HIF3A|CREBL2|ARL2BP|KITLG|CDC73|MAP3K2|RBPJ|CLOCK|THRB|RORB|RORA|CBFA2T2|CBFB|LBH|BRCA1|CD28|DDX3X|IFNG|SP1|IRF2BPL|SMAD1|THOC1|BMP7|BMP2|GPBP1|RFX4|ACSL3|MID1IP1|MAF|ATMIN|CSRP3|LMO2|DMRT1|TNFSF11|FOXP1|ELAVL1|GLIS2|FOXJ2|MED1|NEK4|CCNT2|HSPH1|CHD6|EGR2|	http://amigo.geneontology.org/amigo/term/GO:0031328
positive regulation of cellular biosynthetic process	Gene Ontology	GO:0031328	149	821	5.13801e-26	3.89384e-24	HIF3A|CREBL2|ARL2BP|KITLG|CDC73|MAP3K2|RBPJ|CLOCK|THRB|RORB|RORA|CBFA2T2|CBFB|LBH|BRCA1|CD28|DDX3X|IFNG|SP1|IRF2BPL|SMAD1|THOC1|BMP7|BMP2|GPBP1|RFX4|ACSL3|MID1IP1|MAF|ATMIN|CSRP3|LMO2|DMRT1|TNFSF11|FOXP1|ELAVL1|GLIS2|FOXJ2|MED1|NEK4|CCNT2|HSPH1|CHD6|EGR2|	http://amigo.geneontology.org/amigo/term/GO:0031328
regulation of response to stimulus	Gene Ontology Slim	GO:0048583	227	1600	8.22251e-26	6.16514e-24	BCL2L1|ERRFI1|TRIM13|PGAP2|KMT5A|TSPAN14|SCG2|PPP4R2|IL6ST|HIPK3|HIPK1|NCK1|NKX2-1|CAV2|THOC1|GPR37|IFNW1|OTUD7B|ADAMTS3|PPP1R2|RBPJ|DYNLT1|MAP3K7|RORA|LBH|CDKN2B|IGF1R|STAT3|DDX3X|LRRC4|MTM1|ENPP4|ZNF366|SERPINB9|ANGPT2|TNFRSF21|STK3|STK4|HMGCR|ARRDC3|SN	http://amigo.geneontology.org/amigo/term/GO:0048583
regulation of response to stimulus	Gene Ontology	GO:0048583	227	1600	8.22251e-26	6.16514e-24	BCL2L1|ERRFI1|TRIM13|PGAP2|KMT5A|TSPAN14|SCG2|PPP4R2|IL6ST|HIPK3|HIPK1|NCK1|NKX2-1|CAV2|THOC1|GPR37|IFNW1|OTUD7B|ADAMTS3|PPP1R2|RBPJ|DYNLT1|MAP3K7|RORA|LBH|CDKN2B|IGF1R|STAT3|DDX3X|LRRC4|MTM1|ENPP4|ZNF366|SERPINB9|ANGPT2|TNFRSF21|STK3|STK4|HMGCR|ARRDC3|SN	http://amigo.geneontology.org/amigo/term/GO:0048583
cellular protein metabolic process	Gene Ontology Slim	GO:0044267	311	2547	2.09925e-25	1.55742e-23	UBE2Q1|ERRFI1|TRIM13|PGAP2|DPH6|RNF13|SUMO1|CDK16|KMT5A|SCG2|RIC1|DOLPP1|PPIL2|PPIL3|CREBL2|CAPRIN1|SLC25A17|SLC25A16|CCNT2|CAV2|IFNG|GPR37|IFNW1|OTUD7B|SMG1|ASB7|PPP1R2|MAP3K2|CLOCK|PAQR3|PPME1|PROX1|KMT5B|SGK1|CBFB|CTSV|GOLGA7|PPP6C|WEE1|MTMR4|SETDB2|CD	http://amigo.geneontology.org/amigo/term/GO:0044267
cellular protein metabolic process	Gene Ontology	GO:0044267	311	2547	2.09925e-25	1.55742e-23	UBE2Q1|ERRFI1|TRIM13|PGAP2|DPH6|RNF13|SUMO1|CDK16|KMT5A|SCG2|RIC1|DOLPP1|PPIL2|PPIL3|CREBL2|CAPRIN1|SLC25A17|SLC25A16|CCNT2|CAV2|IFNG|GPR37|IFNW1|OTUD7B|SMG1|ASB7|PPP1R2|MAP3K2|CLOCK|PAQR3|PPME1|PROX1|KMT5B|SGK1|CBFB|CTSV|GOLGA7|PPP6C|WEE1|MTMR4|SETDB2|CD	http://amigo.geneontology.org/amigo/term/GO:0044267
positive regulation of nucleic acid-templated transcription	Gene Ontology Slim	GO:1903508	135	711	3.13752e-25	2.27972e-23	HIF3A|CREBL2|ARL2BP|CDC73|MAP3K2|RBPJ|CLOCK|THRB|RORB|RORA|CBFA2T2|CBFB|LBH|BRCA1|DDX3X|IFNG|SP1|IRF2BPL|SMAD1|THOC1|BMP7|BMP2|GPBP1|RFX4|MAF|RNF6|CSRP3|LMO2|DMRT1|TNFSF11|FOXP1|GLIS2|FOXJ2|MED1|NEK4|CCNT2|HSPH1|CHD6|EGR2|TADA2B|UBE3A|PPARGC1A|SOX17|CHEK1	http://amigo.geneontology.org/amigo/term/GO:1903508
positive regulation of RNA biosynthetic process	Gene Ontology Slim	GO:1902680	135	711	3.13752e-25	2.27972e-23	HIF3A|CREBL2|ARL2BP|CDC73|MAP3K2|RBPJ|CLOCK|THRB|RORB|RORA|CBFA2T2|CBFB|LBH|BRCA1|DDX3X|IFNG|SP1|IRF2BPL|SMAD1|THOC1|BMP7|BMP2|GPBP1|RFX4|MAF|RNF6|CSRP3|LMO2|DMRT1|TNFSF11|FOXP1|GLIS2|FOXJ2|MED1|NEK4|CCNT2|HSPH1|CHD6|EGR2|TADA2B|UBE3A|PPARGC1A|SOX17|CHEK1	http://amigo.geneontology.org/amigo/term/GO:1902680
positive regulation of nucleic acid-templated transcription	Gene Ontology	GO:1903508	135	711	3.13752e-25	2.27972e-23	HIF3A|CREBL2|ARL2BP|CDC73|MAP3K2|RBPJ|CLOCK|THRB|RORB|RORA|CBFA2T2|CBFB|LBH|BRCA1|DDX3X|IFNG|SP1|IRF2BPL|SMAD1|THOC1|BMP7|BMP2|GPBP1|RFX4|MAF|RNF6|CSRP3|LMO2|DMRT1|TNFSF11|FOXP1|GLIS2|FOXJ2|MED1|NEK4|CCNT2|HSPH1|CHD6|EGR2|TADA2B|UBE3A|PPARGC1A|SOX17|CHEK1	http://amigo.geneontology.org/amigo/term/GO:1903508
positive regulation of RNA biosynthetic process	Gene Ontology	GO:1902680	135	711	3.13752e-25	2.27972e-23	HIF3A|CREBL2|ARL2BP|CDC73|MAP3K2|RBPJ|CLOCK|THRB|RORB|RORA|CBFA2T2|CBFB|LBH|BRCA1|DDX3X|IFNG|SP1|IRF2BPL|SMAD1|THOC1|BMP7|BMP2|GPBP1|RFX4|MAF|RNF6|CSRP3|LMO2|DMRT1|TNFSF11|FOXP1|GLIS2|FOXJ2|MED1|NEK4|CCNT2|HSPH1|CHD6|EGR2|TADA2B|UBE3A|PPARGC1A|SOX17|CHEK1	http://amigo.geneontology.org/amigo/term/GO:1902680
positive regulation of transcription, DNA-templated	Gene Ontology Slim	GO:0045893	129	667	8.99986e-25	6.47255e-23	HIF3A|CREBL2|CCNT2|CDC73|MAP3K2|RBPJ|CLOCK|THRB|RORB|RORA|CBFA2T2|CBFB|LBH|BRCA1|DDX3X|IFNG|SP1|IRF2BPL|SMAD1|THOC1|BMP7|BMP2|GPBP1|RFX4|MAF|RNF6|CSRP3|LMO2|DMRT1|TNFSF11|FOXP1|GLIS2|FOXJ2|MED1|NEK4|NKX2-1|HSPH1|CHD6|EGR2|UBE3A|PPARGC1A|SOX17|CHEK1|SIRT1|	http://amigo.geneontology.org/amigo/term/GO:0045893
positive regulation of transcription, DNA-templated	Gene Ontology	GO:0045893	129	667	8.99986e-25	6.47255e-23	HIF3A|CREBL2|CCNT2|CDC73|MAP3K2|RBPJ|CLOCK|THRB|RORB|RORA|CBFA2T2|CBFB|LBH|BRCA1|DDX3X|IFNG|SP1|IRF2BPL|SMAD1|THOC1|BMP7|BMP2|GPBP1|RFX4|MAF|RNF6|CSRP3|LMO2|DMRT1|TNFSF11|FOXP1|GLIS2|FOXJ2|MED1|NEK4|NKX2-1|HSPH1|CHD6|EGR2|UBE3A|PPARGC1A|SOX17|CHEK1|SIRT1|	http://amigo.geneontology.org/amigo/term/GO:0045893
regulation of cell communication	Gene Ontology Slim	GO:0010646	197	1321	1.10116e-24	7.8394e-23	BCL2L1|ERRFI1|TRIM13|PGAP2|KMT5A|TSPAN14|SCG2|IL6ST|HIPK3|HIPK1|NCK1|NKX2-1|CAV2|KITLG|GPR37|IFNW1|OTUD7B|ADAMTS3|PPP1R2|RBPJ|DYNLT1|MAP3K7|RORA|NAPB|CNTNAP4|CDKN2B|IGF1R|STAT3|DDX3X|SNAP25|LRRC4|MTM1|TMF1|ACVR1C|ZNF366|FLRT3|STK3|STK4|HMGCR|ARRDC3|SNAI2|	http://amigo.geneontology.org/amigo/term/GO:0010646
regulation of cell communication	Gene Ontology	GO:0010646	197	1321	1.10116e-24	7.8394e-23	BCL2L1|ERRFI1|TRIM13|PGAP2|KMT5A|TSPAN14|SCG2|IL6ST|HIPK3|HIPK1|NCK1|NKX2-1|CAV2|KITLG|GPR37|IFNW1|OTUD7B|ADAMTS3|PPP1R2|RBPJ|DYNLT1|MAP3K7|RORA|NAPB|CNTNAP4|CDKN2B|IGF1R|STAT3|DDX3X|SNAP25|LRRC4|MTM1|TMF1|ACVR1C|ZNF366|FLRT3|STK3|STK4|HMGCR|ARRDC3|SNAI2|	http://amigo.geneontology.org/amigo/term/GO:0010646
regulation of signaling	Gene Ontology Slim	GO:0023051	197	1326	1.64669e-24	1.16059e-22	BCL2L1|ERRFI1|TRIM13|PGAP2|KMT5A|TSPAN14|SCG2|IL6ST|HIPK3|HIPK1|NCK1|NKX2-1|CAV2|KITLG|GPR37|IFNW1|OTUD7B|ADAMTS3|PPP1R2|RBPJ|DYNLT1|MAP3K7|RORA|NAPB|CNTNAP4|CDKN2B|IGF1R|STAT3|DDX3X|SNAP25|LRRC4|MTM1|TMF1|ACVR1C|ZNF366|FLRT3|STK3|STK4|HMGCR|ARRDC3|SNAI2|	http://amigo.geneontology.org/amigo/term/GO:0023051
regulation of signaling	Gene Ontology	GO:0023051	197	1326	1.64669e-24	1.16059e-22	BCL2L1|ERRFI1|TRIM13|PGAP2|KMT5A|TSPAN14|SCG2|IL6ST|HIPK3|HIPK1|NCK1|NKX2-1|CAV2|KITLG|GPR37|IFNW1|OTUD7B|ADAMTS3|PPP1R2|RBPJ|DYNLT1|MAP3K7|RORA|NAPB|CNTNAP4|CDKN2B|IGF1R|STAT3|DDX3X|SNAP25|LRRC4|MTM1|TMF1|ACVR1C|ZNF366|FLRT3|STK3|STK4|HMGCR|ARRDC3|SNAI2|	http://amigo.geneontology.org/amigo/term/GO:0023051
positive regulation of nucleobase-containing compound metabolic process	Gene Ontology Slim	GO:0045935	142	790	1.78449e-24	1.24526e-22	HIF3A|CREBL2|ARL2BP|CDC73|MAP3K2|RBPJ|CLOCK|THRB|RORB|RORA|CBFA2T2|CBFB|LBH|BRCA1|DDX3X|IFNG|SP1|IRF2BPL|SMAD1|THOC1|BMP7|BMP2|GPBP1|RFX4|MAF|ATMIN|CSRP3|LMO2|DMRT1|TNFSF11|FOXP1|GLIS2|CELF4|FOXJ2|PUM1|BTG2|NEK4|CCNT2|HSPH1|CHD6|EGR2|TADA2B|UBE3A|PPARGC1A	http://amigo.geneontology.org/amigo/term/GO:0045935
positive regulation of nucleobase-containing compound metabolic process	Gene Ontology	GO:0045935	142	790	1.78449e-24	1.24526e-22	HIF3A|CREBL2|ARL2BP|CDC73|MAP3K2|RBPJ|CLOCK|THRB|RORB|RORA|CBFA2T2|CBFB|LBH|BRCA1|DDX3X|IFNG|SP1|IRF2BPL|SMAD1|THOC1|BMP7|BMP2|GPBP1|RFX4|MAF|ATMIN|CSRP3|LMO2|DMRT1|TNFSF11|FOXP1|GLIS2|CELF4|FOXJ2|PUM1|BTG2|NEK4|CCNT2|HSPH1|CHD6|EGR2|TADA2B|UBE3A|PPARGC1A	http://amigo.geneontology.org/amigo/term/GO:0045935
signal transduction	Gene Ontology Slim	GO:0007165	332	2835	2.20945e-24	1.52669e-22	BCL2L1|ERRFI1|TRIM13|PGAP2|CD9|TM2D1|PLCXD3|KMT5A|TSPAN14|SCG2|IL6ST|HIPK3|GPR22|ZFAND5|AKT3|NCK1|BDNF|NKX2-1|CAV2|THOC1|GPR37|IFNW1|CYP26B1|OTUD7B|GNAI3|ASB7|ADAMTS3|ASB5|MAP3K2|RBPJ|CLOCK|DYNLT1|RORB|GNG12|CA8|DDIT4|ARHGAP29|MTMR4|COMMD7|CELF4|CDKN2B|GP	http://amigo.geneontology.org/amigo/term/GO:0007165
signal transduction	Gene Ontology	GO:0007165	332	2835	2.20945e-24	1.52669e-22	BCL2L1|ERRFI1|TRIM13|PGAP2|CD9|TM2D1|PLCXD3|KMT5A|TSPAN14|SCG2|IL6ST|HIPK3|GPR22|ZFAND5|AKT3|NCK1|BDNF|NKX2-1|CAV2|THOC1|GPR37|IFNW1|CYP26B1|OTUD7B|GNAI3|ASB7|ADAMTS3|ASB5|MAP3K2|RBPJ|CLOCK|DYNLT1|RORB|GNG12|CA8|DDIT4|ARHGAP29|MTMR4|COMMD7|CELF4|CDKN2B|GP	http://amigo.geneontology.org/amigo/term/GO:0007165
nucleic acid binding	Gene Ontology Slim	GO:0003676	232	1700	2.39257e-24	1.63717e-22	HIF3A|ZFX|SUMO1|CELF4|UHMK1|ZFAND5|ZFAND3|CREBL2|POLR3A|SKIL|NKX2-1|ETS2|LHX2|OTUD7B|RAI1|NFE2L3|ZNF148|RBPJ|CLOCK|THRB|RORB|RORA|N6AMT1|ESRP1|IRX5|PTBP1|HBS1L|SETDB2|NABP1|ZBTB8A|DDX3X|TSNAX|ZMYM5|HEY2|SP1|ZNF362|ENPP3|ZNF367|ZNF366|PAN2|MED1|DMRTC2|SNAI	http://amigo.geneontology.org/amigo/term/GO:0003676
nucleic acid binding	Gene Ontology	GO:0003676	232	1700	2.39257e-24	1.63717e-22	HIF3A|ZFX|SUMO1|CELF4|UHMK1|ZFAND5|ZFAND3|CREBL2|POLR3A|SKIL|NKX2-1|ETS2|LHX2|OTUD7B|RAI1|NFE2L3|ZNF148|RBPJ|CLOCK|THRB|RORB|RORA|N6AMT1|ESRP1|IRX5|PTBP1|HBS1L|SETDB2|NABP1|ZBTB8A|DDX3X|TSNAX|ZMYM5|HEY2|SP1|ZNF362|ENPP3|ZNF367|ZNF366|PAN2|MED1|DMRTC2|SNAI	http://amigo.geneontology.org/amigo/term/GO:0003676
localization	Gene Ontology Slim	GO:0051179	327	2779	2.62309e-24	1.77765e-22	LIN7A|BCL2L1|LIN7C|PGAP2|ICK|CTNNA3|HSPA4|SUMO1|UVRAG|SCG2|RIC1|ZFAND5|STX1B|GPM6A|SRSF10|CREBL2|POLR3A|SLC30A5|SLC25A16|SLC30A7|ARL2BP|CAV2|KCNJ2|CANX|MSR1|DLG3|OTUD7B|TTC30B|STAT3|SLC28A3|RBPJ|CLOCK|MPP7|NIPBL|NAPG|NAPB|GOLGA7|VPS35|ABCD3|DPH6|MAPRE1|SE	http://amigo.geneontology.org/amigo/term/GO:0051179
localization	Gene Ontology	GO:0051179	327	2779	2.62309e-24	1.77765e-22	LIN7A|BCL2L1|LIN7C|PGAP2|ICK|CTNNA3|HSPA4|SUMO1|UVRAG|SCG2|RIC1|ZFAND5|STX1B|GPM6A|SRSF10|CREBL2|POLR3A|SLC30A5|SLC25A16|SLC30A7|ARL2BP|CAV2|KCNJ2|CANX|MSR1|DLG3|OTUD7B|TTC30B|STAT3|SLC28A3|RBPJ|CLOCK|MPP7|NIPBL|NAPG|NAPB|GOLGA7|VPS35|ABCD3|DPH6|MAPRE1|SE	http://amigo.geneontology.org/amigo/term/GO:0051179
regulation of transcription by RNA polymerase II	Gene Ontology Slim	GO:0006357	152	897	7.13445e-24	4.78891e-22	HIF3A|KMT5A|NCK1|CCNT2|OTUD7B|CDC73|NFE2L3|RBPJ|CLOCK|THRB|RORB|RORA|CBFA2T2|CBFB|BRCA1|DDX3X|ZMYM5|IFNG|SP1|CREB1|ZNF367|ZNF366|SNAI2|BMP7|BMP2|RFX4|RFX7|MAF|CSRP3|RNF2|YBX3|FOXP2|DMRT1|TNFSF11|FOXP1|GLIS2|LMO4|FOXJ2|NFKBIZ|MED1|IL1A|NKX2-1|HSPH1|CHD6|EG	http://amigo.geneontology.org/amigo/term/GO:0006357
regulation of transcription by RNA polymerase II	Gene Ontology	GO:0006357	152	897	7.13445e-24	4.78891e-22	HIF3A|KMT5A|NCK1|CCNT2|OTUD7B|CDC73|NFE2L3|RBPJ|CLOCK|THRB|RORB|RORA|CBFA2T2|CBFB|BRCA1|DDX3X|ZMYM5|IFNG|SP1|CREB1|ZNF367|ZNF366|SNAI2|BMP7|BMP2|RFX4|RFX7|MAF|CSRP3|RNF2|YBX3|FOXP2|DMRT1|TNFSF11|FOXP1|GLIS2|LMO4|FOXJ2|NFKBIZ|MED1|IL1A|NKX2-1|HSPH1|CHD6|EG	http://amigo.geneontology.org/amigo/term/GO:0006357
nervous system development	Gene Ontology Slim	GO:0007399	144	830	1.64965e-23	1.09123e-21	PGAP1|IL6ST|FKBP4|HIPK1|GPM6A|CAPRIN1|BDNF|NKX2-1|DLG3|RBPJ|DYNLT1|RORB|RORA|CBFA2T2|IRX5|SLITRK6|SLITRK2|SNAP25|IFNG|TNFRSF21|STK3|STK4|SMARCD1|PAFAH1B1|BMP7|UBE4B|BMP2|RFX4|ACSL6|VIM|HCN1|PKD2|RNF6|SPRY3|FOXP2|FOXP1|STMN2|HESX1|EMX2|NDNF|MED1|PREX2|GAP4	http://amigo.geneontology.org/amigo/term/GO:0007399
nervous system development	Gene Ontology	GO:0007399	144	830	1.64965e-23	1.09123e-21	PGAP1|IL6ST|FKBP4|HIPK1|GPM6A|CAPRIN1|BDNF|NKX2-1|DLG3|RBPJ|DYNLT1|RORB|RORA|CBFA2T2|IRX5|SLITRK6|SLITRK2|SNAP25|IFNG|TNFRSF21|STK3|STK4|SMARCD1|PAFAH1B1|BMP7|UBE4B|BMP2|RFX4|ACSL6|VIM|HCN1|PKD2|RNF6|SPRY3|FOXP2|FOXP1|STMN2|HESX1|EMX2|NDNF|MED1|PREX2|GAP4	http://amigo.geneontology.org/amigo/term/GO:0007399
regulation of developmental process	Gene Ontology Slim	GO:0050793	163	1012	1.65666e-23	1.09123e-21	ERRFI1|IL6ST|FKBP4|CREBL2|GPM6B|BDNF|NKX2-1|KITLG|MSR1|CDC73|FNDC5|RBPJ|DYNLT1|RORB|RORA|CBFA2T2|LMO4|MKLN1|PTBP1|SLITRK6|SLITRK2|IFNG|MTM1|CREB1|TNFRSF21|LPL|STK4|SNAI2|THOC1|BMP7|SNAP25|BMP2|RFX4|NPY1R|SYT4|VIM|RNF6|CSRP3|YBX3|IL7R|TNFSF11|FOXP1|ELAVL1|	http://amigo.geneontology.org/amigo/term/GO:0050793
regulation of developmental process	Gene Ontology	GO:0050793	163	1012	1.65666e-23	1.09123e-21	ERRFI1|IL6ST|FKBP4|CREBL2|GPM6B|BDNF|NKX2-1|KITLG|MSR1|CDC73|FNDC5|RBPJ|DYNLT1|RORB|RORA|CBFA2T2|LMO4|MKLN1|PTBP1|SLITRK6|SLITRK2|IFNG|MTM1|CREB1|TNFRSF21|LPL|STK4|SNAI2|THOC1|BMP7|SNAP25|BMP2|RFX4|NPY1R|SYT4|VIM|RNF6|CSRP3|YBX3|IL7R|TNFSF11|FOXP1|ELAVL1|	http://amigo.geneontology.org/amigo/term/GO:0050793
cell development	Gene Ontology Slim	GO:0048468	142	825	6.57023e-23	4.28768e-21	BCL2L1|COL11A1|IL6ST|FKBP4|GPM6A|CAPRIN1|BDNF|NKX2-1|CAV2|DYNLT1|RORB|CBFA2T2|CBFB|IRX5|SLITRK6|SLITRK2|SNAP25|TMF1|HOMER1|TNFRSF21|SNAI2|KITLG|CHSY1|PAFAH1B1|BMP7|UBE4B|STRBP|BMP2|HCN1|PLAG1|SYT4|VIM|RNF6|CSRP3|RNF2|SPRY3|TNFSF11|FOXP1|ATP2A2|STMN2|CELF1	http://amigo.geneontology.org/amigo/term/GO:0048468
cell development	Gene Ontology	GO:0048468	142	825	6.57023e-23	4.28768e-21	BCL2L1|COL11A1|IL6ST|FKBP4|GPM6A|CAPRIN1|BDNF|NKX2-1|CAV2|DYNLT1|RORB|CBFA2T2|CBFB|IRX5|SLITRK6|SLITRK2|SNAP25|TMF1|HOMER1|TNFRSF21|SNAI2|KITLG|CHSY1|PAFAH1B1|BMP7|UBE4B|STRBP|BMP2|HCN1|PLAG1|SYT4|VIM|RNF6|CSRP3|RNF2|SPRY3|TNFSF11|FOXP1|ATP2A2|STMN2|CELF1	http://amigo.geneontology.org/amigo/term/GO:0048468
regulation of signal transduction	Gene Ontology Slim	GO:0009966	181	1210	7.74028e-23	4.97833e-21	BCL2L1|ERRFI1|TRIM13|PGAP2|KMT5A|TSPAN14|SCG2|IL6ST|HIPK3|HIPK1|NCK1|NKX2-1|CAV2|KITLG|GPR37|IFNW1|OTUD7B|ADAMTS3|PPP1R2|RBPJ|DYNLT1|MAP3K7|RORA|CDKN2B|IGF1R|STAT3|DDX3X|LRRC4|MTM1|ZNF366|FLRT3|STK3|STK4|HMGCR|ARRDC3|SNAI2|VPS35|TMEM101|CHSY1|UBR5|BMP2|BM	http://amigo.geneontology.org/amigo/term/GO:0009966
regulation of signal transduction	Gene Ontology	GO:0009966	181	1210	7.74028e-23	4.97833e-21	BCL2L1|ERRFI1|TRIM13|PGAP2|KMT5A|TSPAN14|SCG2|IL6ST|HIPK3|HIPK1|NCK1|NKX2-1|CAV2|KITLG|GPR37|IFNW1|OTUD7B|ADAMTS3|PPP1R2|RBPJ|DYNLT1|MAP3K7|RORA|CDKN2B|IGF1R|STAT3|DDX3X|LRRC4|MTM1|ZNF366|FLRT3|STK3|STK4|HMGCR|ARRDC3|SNAI2|VPS35|TMEM101|CHSY1|UBR5|BMP2|BM	http://amigo.geneontology.org/amigo/term/GO:0009966
animal organ development	Gene Ontology Slim	GO:0048513	198	1386	7.76982e-23	4.97833e-21	LIN7A|PGAP1|EGR1|COL11A1|ERRFI1|KMT5B|CPE|CHSY1|ZFAND5|GPM6A|GPM6B|NKX2-1|CAV2|TRIM62|IFNW1|ADAMTS6|CDC73|ADAMTS2|RBPJ|THRB|RORB|RORA|CBFB|IRX5|CDKN2B|DDIT4|IFNG|MTM1|TMF1|SMAD1|FLRT3|STK3|STK4|ARRDC3|SNAI2|KITLG|CTSV|SEMA3D|BMP7|UBE4B|LELP1|BMP2|RBM47|RF	http://amigo.geneontology.org/amigo/term/GO:0048513
animal organ development	Gene Ontology	GO:0048513	198	1386	7.76982e-23	4.97833e-21	LIN7A|PGAP1|EGR1|COL11A1|ERRFI1|KMT5B|CPE|CHSY1|ZFAND5|GPM6A|GPM6B|NKX2-1|CAV2|TRIM62|IFNW1|ADAMTS6|CDC73|ADAMTS2|RBPJ|THRB|RORB|RORA|CBFB|IRX5|CDKN2B|DDIT4|IFNG|MTM1|TMF1|SMAD1|FLRT3|STK3|STK4|ARRDC3|SNAI2|KITLG|CTSV|SEMA3D|BMP7|UBE4B|LELP1|BMP2|RBM47|RF	http://amigo.geneontology.org/amigo/term/GO:0048513
transcription by RNA polymerase II	Gene Ontology Slim	GO:0006366	153	932	8.0594e-23	5.11735e-21	HIF3A|KMT5A|NCK1|CCNT2|OTUD7B|CDC73|NFE2L3|RBPJ|CLOCK|THRB|KLF5|RORA|CBFA2T2|CBFB|BRCA1|DDX3X|ZMYM5|IFNG|SP1|CREB1|ZNF367|ZNF366|SNAI2|BMP7|BMP2|RFX4|RFX7|MAF|CSRP3|RNF2|YBX3|FOXP2|DMRT1|TNFSF11|FOXP1|GLIS2|LMO4|FOXJ2|NFKBIZ|MED1|IL1A|GTF2E1|NKX2-1|HSPH1|	http://amigo.geneontology.org/amigo/term/GO:0006366
transcription by RNA polymerase II	Gene Ontology	GO:0006366	153	932	8.0594e-23	5.11735e-21	HIF3A|KMT5A|NCK1|CCNT2|OTUD7B|CDC73|NFE2L3|RBPJ|CLOCK|THRB|KLF5|RORA|CBFA2T2|CBFB|BRCA1|DDX3X|ZMYM5|IFNG|SP1|CREB1|ZNF367|ZNF366|SNAI2|BMP7|BMP2|RFX4|RFX7|MAF|CSRP3|RNF2|YBX3|FOXP2|DMRT1|TNFSF11|FOXP1|GLIS2|LMO4|FOXJ2|NFKBIZ|MED1|IL1A|GTF2E1|NKX2-1|HSPH1|	http://amigo.geneontology.org/amigo/term/GO:0006366
negative regulation of macromolecule metabolic process	Gene Ontology Slim	GO:0010605	166	1078	3.96291e-22	2.49381e-20	HIF3A|ERRFI1|KMT5A|RIC1|HIPK3|SRSF10|CAPRIN1|NKX2-1|OTUD7B|SMG1|CDC73|BRCA1|HEY2|RBPJ|THRB|ZNF706|CBFA2T2|SAP18|PTBP1|CDKN2B|IGF1R|DDX3X|LRRC4|MTM1|TMF1|LRRTM2|PRMT6|IRF2BPL|ZNF366|SERPINB9|FLRT3|HMGCR|SNAI2|DICER1|THOC1|UBR5|TFAP2C|BMP7|BMP2|BAK1|MEF2A|Z	http://amigo.geneontology.org/amigo/term/GO:0010605
negative regulation of macromolecule metabolic process	Gene Ontology	GO:0010605	166	1078	3.96291e-22	2.49381e-20	HIF3A|ERRFI1|KMT5A|RIC1|HIPK3|SRSF10|CAPRIN1|NKX2-1|OTUD7B|SMG1|CDC73|BRCA1|HEY2|RBPJ|THRB|ZNF706|CBFA2T2|SAP18|PTBP1|CDKN2B|IGF1R|DDX3X|LRRC4|MTM1|TMF1|LRRTM2|PRMT6|IRF2BPL|ZNF366|SERPINB9|FLRT3|HMGCR|SNAI2|DICER1|THOC1|UBR5|TFAP2C|BMP7|BMP2|BAK1|MEF2A|Z	http://amigo.geneontology.org/amigo/term/GO:0010605
negative regulation of metabolic process	Gene Ontology Slim	GO:0009892	175	1170	4.29733e-22	2.68032e-20	HIF3A|ERRFI1|KMT5A|RIC1|HIPK3|SRSF10|CAPRIN1|NKX2-1|DLG3|OTUD7B|SMG1|PPP1R2|BRCA1|HEY2|RBPJ|THRB|ZNF706|CBFA2T2|SAP18|PTBP1|CDKN2B|IGF1R|DDX3X|LRRC4|MTM1|TMF1|LRRTM2|PRMT6|IRF2BPL|ZNF366|SERPINB9|FLRT3|HMGCR|SNAI2|DICER1|THOC1|UBR5|TFAP2C|BMP7|BMP2|BAK1|M	http://amigo.geneontology.org/amigo/term/GO:0009892
negative regulation of metabolic process	Gene Ontology	GO:0009892	175	1170	4.29733e-22	2.68032e-20	HIF3A|ERRFI1|KMT5A|RIC1|HIPK3|SRSF10|CAPRIN1|NKX2-1|DLG3|OTUD7B|SMG1|PPP1R2|BRCA1|HEY2|RBPJ|THRB|ZNF706|CBFA2T2|SAP18|PTBP1|CDKN2B|IGF1R|DDX3X|LRRC4|MTM1|TMF1|LRRTM2|PRMT6|IRF2BPL|ZNF366|SERPINB9|FLRT3|HMGCR|SNAI2|DICER1|THOC1|UBR5|TFAP2C|BMP7|BMP2|BAK1|M	http://amigo.geneontology.org/amigo/term/GO:0009892
DNA binding	Gene Ontology Slim	GO:0003677	165	1070	4.70165e-22	2.90678e-20	HIF3A|ZFX|SUMO1|ZBTB8A|ZFAND5|ZFAND3|CREBL2|POLR3A|NKX2-1|ETS2|LHX2|OTUD7B|NFE2L3|ZNF148|RBPJ|CLOCK|THRB|RORB|RORA|IRX5|SETDB2|NABP1|BRCA1|DDX3X|TSNAX|ZMYM5|HEY2|SP1|NFIL3|CREB1|DMRTC2|SNAI2|STRBP|GPBP1|RFX4|RFX7|ELK4|MAF|ATMIN|ZBTB21|YBX3|HOXC9|DMRT1|DMR	http://amigo.geneontology.org/amigo/term/GO:0003677
DNA binding	Gene Ontology	GO:0003677	165	1070	4.70165e-22	2.90678e-20	HIF3A|ZFX|SUMO1|ZBTB8A|ZFAND5|ZFAND3|CREBL2|POLR3A|NKX2-1|ETS2|LHX2|OTUD7B|NFE2L3|ZNF148|RBPJ|CLOCK|THRB|RORB|RORA|IRX5|SETDB2|NABP1|BRCA1|DDX3X|TSNAX|ZMYM5|HEY2|SP1|NFIL3|CREB1|DMRTC2|SNAI2|STRBP|GPBP1|RFX4|RFX7|ELK4|MAF|ATMIN|ZBTB21|YBX3|HOXC9|DMRT1|DMR	http://amigo.geneontology.org/amigo/term/GO:0003677
tissue development	Gene Ontology Slim	GO:0009888	137	803	7.90689e-22	4.84589e-20	ERRFI1|LIN7C|COL11A1|CHSY1|ZFAND5|GPM6B|NKX2-1|CAV2|DLG3|CDC73|RBPJ|THRB|CBFA2T2|SLITRK6|MTM1|SMAD1|FLRT3|STK3|STK4|ARRDC3|SNAI2|KITLG|CTSV|SEMA3D|BMP7|UBE4B|LELP1|BMP2|VIM|MAF|CSRP3|YBX3|FOXP2|DMRT1|TNFSF11|FOXP1|HESX1|LMO4|GAB1|MED1|KL|EGR2|EGR1|SOX17|C	http://amigo.geneontology.org/amigo/term/GO:0009888
tissue development	Gene Ontology	GO:0009888	137	803	7.90689e-22	4.84589e-20	ERRFI1|LIN7C|COL11A1|CHSY1|ZFAND5|GPM6B|NKX2-1|CAV2|DLG3|CDC73|RBPJ|THRB|CBFA2T2|SLITRK6|MTM1|SMAD1|FLRT3|STK3|STK4|ARRDC3|SNAI2|KITLG|CTSV|SEMA3D|BMP7|UBE4B|LELP1|BMP2|VIM|MAF|CSRP3|YBX3|FOXP2|DMRT1|TNFSF11|FOXP1|HESX1|LMO4|GAB1|MED1|KL|EGR2|EGR1|SOX17|C	http://amigo.geneontology.org/amigo/term/GO:0009888
membrane	Gene Ontology Slim	GO:0016020	490	4954	1.11364e-21	6.76633e-20	PGAP1|ERRFI1|PGAP2|PPP3R1|RNF13|SUMO1|TMCO1|CPE|IL6ST|FKBP4|GPM6A|GPM6B|RAB11A|DLG3|GPR180|SLC28A3|CDC42SE2|NAPG|SPTLC2|NAPB|SPTLC1|ABCD3|PCDH11X|IGF1R|SLITRK2|SLC38A2|WIPI2|GYPA|TMEM184B|RIC1|PRRG4|AKAP5|AKAP1|HCN1|CCND2|BAK1|IL7R|TNFSF11|ELAVL1|ACVR1C|G	http://amigo.geneontology.org/amigo/term/GO:0016020
membrane	Gene Ontology	GO:0016020	490	4954	1.11364e-21	6.76633e-20	PGAP1|ERRFI1|PGAP2|PPP3R1|RNF13|SUMO1|TMCO1|CPE|IL6ST|FKBP4|GPM6A|GPM6B|RAB11A|DLG3|GPR180|SLC28A3|CDC42SE2|NAPG|SPTLC2|NAPB|SPTLC1|ABCD3|PCDH11X|IGF1R|SLITRK2|SLC38A2|WIPI2|GYPA|TMEM184B|RIC1|PRRG4|AKAP5|AKAP1|HCN1|CCND2|BAK1|IL7R|TNFSF11|ELAVL1|ACVR1C|G	http://amigo.geneontology.org/amigo/term/GO:0016020
circulatory system development	Gene Ontology Slim	GO:0072359	97	451	1.17619e-21	7.08529e-20	ERRFI1|COL11A1|SCG2|ZFAND5|ADAMTS6|RBPJ|RORA|CPE|FLRT3|STK3|STK4|SNAI2|BMP7|UBE4B|BMP2|NPY1R|BAK1|CSRP3|FOXP1|NDNF|GAB1|MED1|EGR1|THBS2|SOX17|VEZF1|ANGPT2|ANGPT1|SIRT1|HOXB3|SENP2|SHB|PAX6|VEGFA|VEGFC|RHOB|RHOA|PKNOX1|GNAQ|NOG|MEF2A|PRDM1|MYH10|PDGFRA|ACT	http://amigo.geneontology.org/amigo/term/GO:0072359
circulatory system development	Gene Ontology	GO:0072359	97	451	1.17619e-21	7.08529e-20	ERRFI1|COL11A1|SCG2|ZFAND5|ADAMTS6|RBPJ|RORA|CPE|FLRT3|STK3|STK4|SNAI2|BMP7|UBE4B|BMP2|NPY1R|BAK1|CSRP3|FOXP1|NDNF|GAB1|MED1|EGR1|THBS2|SOX17|VEZF1|ANGPT2|ANGPT1|SIRT1|HOXB3|SENP2|SHB|PAX6|VEGFA|VEGFC|RHOB|RHOA|PKNOX1|GNAQ|NOG|MEF2A|PRDM1|MYH10|PDGFRA|ACT	http://amigo.geneontology.org/amigo/term/GO:0072359
catalytic activity	Gene Ontology Slim	GO:0003824	422	4081	1.47798e-21	8.8278e-20	PGAP1|ERRFI1|AGL|UBE2Q1|RNF13|CPE|RIC1|P4HA2|HIPK1|RAB11A|DLG3|OTUD7B|SMG1|N6AMT1|SPTLC2|SPTLC1|WEE1|HBS1L|IGF1R|IFNG|STK4|UBE4B|CCND2|BAK1|FDX1|IP6K1|STK38L|TNFSF11|ACVR1C|CDKN1B|UBE2D3|TPK1|AK4|PANK3|BMS1|TADA2B|BLMH|RNF44|SENP5|CHUK|SENP1|GDI2|ING3|KCN	http://amigo.geneontology.org/amigo/term/GO:0003824
catalytic activity	Gene Ontology	GO:0003824	422	4081	1.47798e-21	8.8278e-20	PGAP1|ERRFI1|AGL|UBE2Q1|RNF13|CPE|RIC1|P4HA2|HIPK1|RAB11A|DLG3|OTUD7B|SMG1|N6AMT1|SPTLC2|SPTLC1|WEE1|HBS1L|IGF1R|IFNG|STK4|UBE4B|CCND2|BAK1|FDX1|IP6K1|STK38L|TNFSF11|ACVR1C|CDKN1B|UBE2D3|TPK1|AK4|PANK3|BMS1|TADA2B|BLMH|RNF44|SENP5|CHUK|SENP1|GDI2|ING3|KCN	http://amigo.geneontology.org/amigo/term/GO:0003824
metal ion binding	Gene Ontology Slim	GO:0046872	246	1966	3.19846e-21	1.89435e-19	TRIM13|ZFX|PPP3R1|ZRANB2|ARIH1|IDI1|MTF2|CDO1|KCNMA1|P4HA2|ZFAND5|ZFAND3|POLR3A|PAH|TRIM62|CANX|LHX2|OTUD7B|ADAMTS3|ADAMTS2|BRCA1|ZNF148|RNF13|THRB|RORB|RORA|ZNF704|PHC3|CDH1|SLIT3|MBNL2|SETDB2|PCDH11X|ZMYM5|SP1|ENPP4|ZNF362|CPE|ENPP3|ZNF367|ZNF366|ANGPT2	http://amigo.geneontology.org/amigo/term/GO:0046872
metal ion binding	Gene Ontology	GO:0046872	246	1966	3.19846e-21	1.89435e-19	TRIM13|ZFX|PPP3R1|ZRANB2|ARIH1|IDI1|MTF2|CDO1|KCNMA1|P4HA2|ZFAND5|ZFAND3|POLR3A|PAH|TRIM62|CANX|LHX2|OTUD7B|ADAMTS3|ADAMTS2|BRCA1|ZNF148|RNF13|THRB|RORB|RORA|ZNF704|PHC3|CDH1|SLIT3|MBNL2|SETDB2|PCDH11X|ZMYM5|SP1|ENPP4|ZNF362|CPE|ENPP3|ZNF367|ZNF366|ANGPT2	http://amigo.geneontology.org/amigo/term/GO:0046872
negative regulation of cellular metabolic process	Gene Ontology Slim	GO:0031324	160	1051	6.43292e-21	3.77827e-19	HIF3A|ERRFI1|KMT5A|RIC1|HIPK3|SRSF10|CAPRIN1|NKX2-1|DLG3|OTUD7B|PPP1R2|BRCA1|HEY2|RBPJ|THRB|ZNF706|CBFA2T2|SAP18|PTBP1|CDKN2B|IGF1R|DDX3X|LRRC4|MTM1|MDFIC|LRRTM2|PRMT6|IRF2BPL|ZNF366|SERPINB9|FLRT3|HMGCR|SNAI2|THOC1|UBR5|TFAP2C|BMP7|BMP2|BAK1|ZBTB21|RNF2|	http://amigo.geneontology.org/amigo/term/GO:0031324
negative regulation of cellular metabolic process	Gene Ontology	GO:0031324	160	1051	6.43292e-21	3.77827e-19	HIF3A|ERRFI1|KMT5A|RIC1|HIPK3|SRSF10|CAPRIN1|NKX2-1|DLG3|OTUD7B|PPP1R2|BRCA1|HEY2|RBPJ|THRB|ZNF706|CBFA2T2|SAP18|PTBP1|CDKN2B|IGF1R|DDX3X|LRRC4|MTM1|MDFIC|LRRTM2|PRMT6|IRF2BPL|ZNF366|SERPINB9|FLRT3|HMGCR|SNAI2|THOC1|UBR5|TFAP2C|BMP7|BMP2|BAK1|ZBTB21|RNF2|	http://amigo.geneontology.org/amigo/term/GO:0031324
catalytic activity, acting on a protein	Gene Ontology Slim	GO:0140096	213	1618	1.12037e-20	6.52594e-19	UBE2Q1|ERRFI1|TRIM13|RNF13|KMT5B|CDK16|KMT5A|CPE|BMP2|P4HA2|PPIL2|PPIL3|CCNT2|OTUD7B|SMG1|ADAMTS3|PPP1R2|BRCA1|ADAMTS9|MAP3K7|N6AMT1|CTSV|PPP6C|WEE1|MTMR4|SETDB2|CDKN2B|IGF1R|DDX3X|LRRC4|MTM1|CTSC|PRMT6|KLHL28|SERPINB9|FLRT3|KLHL2|HMGCR|ARRDC3|KITLG|RNF19	http://amigo.geneontology.org/amigo/term/GO:0140096
catalytic activity, acting on a protein	Gene Ontology	GO:0140096	213	1618	1.12037e-20	6.52594e-19	UBE2Q1|ERRFI1|TRIM13|RNF13|KMT5B|CDK16|KMT5A|CPE|BMP2|P4HA2|PPIL2|PPIL3|CCNT2|OTUD7B|SMG1|ADAMTS3|PPP1R2|BRCA1|ADAMTS9|MAP3K7|N6AMT1|CTSV|PPP6C|WEE1|MTMR4|SETDB2|CDKN2B|IGF1R|DDX3X|LRRC4|MTM1|CTSC|PRMT6|KLHL28|SERPINB9|FLRT3|KLHL2|HMGCR|ARRDC3|KITLG|RNF19	http://amigo.geneontology.org/amigo/term/GO:0140096
cation binding	Gene Ontology Slim	GO:0043169	248	2017	1.69199e-20	9.77468e-19	TRIM13|ZFX|PPP3R1|ZRANB2|ARIH1|IDI1|MTF2|CDO1|KCNMA1|P4HA2|ZFAND5|ZFAND3|POLR3A|PAH|TRIM62|CANX|LHX2|OTUD7B|ADAMTS3|ADAMTS2|BRCA1|ZNF148|RNF13|THRB|RORB|RORA|ZNF704|PHC3|CDH1|SLIT3|MBNL2|SETDB2|PCDH11X|ZMYM5|SP1|ENPP4|ZNF362|CPE|ENPP3|ZNF367|ZNF366|ANGPT2	http://amigo.geneontology.org/amigo/term/GO:0043169
cation binding	Gene Ontology	GO:0043169	248	2017	1.69199e-20	9.77468e-19	TRIM13|ZFX|PPP3R1|ZRANB2|ARIH1|IDI1|MTF2|CDO1|KCNMA1|P4HA2|ZFAND5|ZFAND3|POLR3A|PAH|TRIM62|CANX|LHX2|OTUD7B|ADAMTS3|ADAMTS2|BRCA1|ZNF148|RNF13|THRB|RORB|RORA|ZNF704|PHC3|CDH1|SLIT3|MBNL2|SETDB2|PCDH11X|ZMYM5|SP1|ENPP4|ZNF362|CPE|ENPP3|ZNF367|ZNF366|ANGPT2	http://amigo.geneontology.org/amigo/term/GO:0043169
transferase activity	Gene Ontology Slim	GO:0016740	212	1624	3.37355e-20	1.93307e-18	UBE2Q1|ERRFI1|TRIM13|AGL|RNF13|KMT5B|CDK16|KMT5A|CHSY1|HIPK3|PPIL2|FZD5|POLR3A|CCNT2|TRIM62|DLG3|SMG1|DCK|PGM2L1|CLOCK|MAP3K7|N6AMT1|SPTLC2|UBR5|SPTLC1|WEE1|SETDB2|CDKN2B|IGF1R|SGMS2|WNK3|PTAR1|PRMT6|FLRT3|STK4|NMT2|HMGCR|ARRDC3|KITLG|RNF19B|KLHL8|RNF19A|	http://amigo.geneontology.org/amigo/term/GO:0016740
transferase activity	Gene Ontology	GO:0016740	212	1624	3.37355e-20	1.93307e-18	UBE2Q1|ERRFI1|TRIM13|AGL|RNF13|KMT5B|CDK16|KMT5A|CHSY1|HIPK3|PPIL2|FZD5|POLR3A|CCNT2|TRIM62|DLG3|SMG1|DCK|PGM2L1|CLOCK|MAP3K7|N6AMT1|SPTLC2|UBR5|SPTLC1|WEE1|SETDB2|CDKN2B|IGF1R|SGMS2|WNK3|PTAR1|PRMT6|FLRT3|STK4|NMT2|HMGCR|ARRDC3|KITLG|RNF19B|KLHL8|RNF19A|	http://amigo.geneontology.org/amigo/term/GO:0016740
negative regulation of nitrogen compound metabolic process	Gene Ontology Slim	GO:0051172	149	965	4.94374e-20	2.80996e-18	HIF3A|ERRFI1|KMT5A|RIC1|HIPK3|SRSF10|CAPRIN1|NKX2-1|OTUD7B|PPP1R2|BRCA1|RBPJ|THRB|ZNF706|CBFA2T2|SAP18|PTBP1|CDKN2B|IGF1R|DDX3X|LRRC4|MTM1|MDFIC|PRMT6|IRF2BPL|ZNF366|SERPINB9|FLRT3|HMGCR|SNAI2|THOC1|UBR5|TFAP2C|BMP7|BMP2|BAK1|ZBTB21|RNF2|YBX3|FOXP2|DMRT1|	http://amigo.geneontology.org/amigo/term/GO:0051172
negative regulation of nitrogen compound metabolic process	Gene Ontology	GO:0051172	149	965	4.94374e-20	2.80996e-18	HIF3A|ERRFI1|KMT5A|RIC1|HIPK3|SRSF10|CAPRIN1|NKX2-1|OTUD7B|PPP1R2|BRCA1|RBPJ|THRB|ZNF706|CBFA2T2|SAP18|PTBP1|CDKN2B|IGF1R|DDX3X|LRRC4|MTM1|MDFIC|PRMT6|IRF2BPL|ZNF366|SERPINB9|FLRT3|HMGCR|SNAI2|THOC1|UBR5|TFAP2C|BMP7|BMP2|BAK1|ZBTB21|RNF2|YBX3|FOXP2|DMRT1|	http://amigo.geneontology.org/amigo/term/GO:0051172
positive regulation of transcription by RNA polymerase II	Gene Ontology Slim	GO:0045944	102	524	5.58786e-20	3.15066e-18	HIF3A|NKX2-1|CDC73|RBPJ|CLOCK|THRB|KLF5|RORA|CBFA2T2|CBFB|BRCA1|DDX3X|IFNG|SP1|IRF2BPL|SMAD1|BMP7|BMP2|RFX4|MAF|CSRP3|DMRT1|TNFSF11|FOXP1|GLIS2|FOXJ2|MED1|CCNT2|HSPH1|CHD6|EGR2|UBE3A|PPARGC1A|SOX17|SIRT1|CHUK|SENP1|SENP2|PAX6|PAX3|INSIG1|ZEB1|PKNOX1|STRN3	http://amigo.geneontology.org/amigo/term/GO:0045944
positive regulation of transcription by RNA polymerase II	Gene Ontology	GO:0045944	102	524	5.58786e-20	3.15066e-18	HIF3A|NKX2-1|CDC73|RBPJ|CLOCK|THRB|KLF5|RORA|CBFA2T2|CBFB|BRCA1|DDX3X|IFNG|SP1|IRF2BPL|SMAD1|BMP7|BMP2|RFX4|MAF|CSRP3|DMRT1|TNFSF11|FOXP1|GLIS2|FOXJ2|MED1|CCNT2|HSPH1|CHD6|EGR2|UBE3A|PPARGC1A|SOX17|SIRT1|CHUK|SENP1|SENP2|PAX6|PAX3|INSIG1|ZEB1|PKNOX1|STRN3	http://amigo.geneontology.org/amigo/term/GO:0045944
nucleoplasm	Gene Ontology Slim	GO:0005654	165	1137	1.03886e-19	5.81102e-18	HIF3A|TM2D1|ADD3|ZRANB2|SUMO1|NDUFB6|FAM222B|PPP4R2|HIPK3|PPIL2|AKT3|SRSF10|CREBL2|MLLT3|CDC73|MAP3K2|HEY2|CLOCK|MAP3K7|ESRP1|UBR5|SAP18|NABP1|PPHLN1|ZMYM5|WIPI2|SP1|MDFIC|ZNF367|THOC1|KLHL8|DR1|CCND2|SYAP1|KPNA4|KPNA2|KPNA1|RNF6|RNF7|CYTIP|RNF2|CLUAP1|MT	http://amigo.geneontology.org/amigo/term/GO:0005654
nucleoplasm	Gene Ontology	GO:0005654	165	1137	1.03886e-19	5.81102e-18	HIF3A|TM2D1|ADD3|ZRANB2|SUMO1|NDUFB6|FAM222B|PPP4R2|HIPK3|PPIL2|AKT3|SRSF10|CREBL2|MLLT3|CDC73|MAP3K2|HEY2|CLOCK|MAP3K7|ESRP1|UBR5|SAP18|NABP1|PPHLN1|ZMYM5|WIPI2|SP1|MDFIC|ZNF367|THOC1|KLHL8|DR1|CCND2|SYAP1|KPNA4|KPNA2|KPNA1|RNF6|RNF7|CYTIP|RNF2|CLUAP1|MT	http://amigo.geneontology.org/amigo/term/GO:0005654
nuclear lumen	Gene Ontology Slim	GO:0031981	209	1630	4.03168e-19	2.23743e-17	HIF3A|TM2D1|ADD3|ZRANB2|SUMO1|NDUFB6|FAM222B|PPP4R2|HIPK3|PPIL2|AKT3|SRSF10|CREBL2|SLC30A5|MLLT3|CDC73|MAP3K2|HEY2|RBPJ|CLOCK|THRB|MAP3K7|SORBS1|CTSV|SAP18|NABP1|PPHLN1|KPNA2|WDR3|ZMYM5|WIPI2|SP1|MDFIC|ZNF367|SMARCD1|SNAI2|THOC1|KLHL8|DR1|FEM1B|CCND2|SYAP	http://amigo.geneontology.org/amigo/term/GO:0031981
nuclear lumen	Gene Ontology	GO:0031981	209	1630	4.03168e-19	2.23743e-17	HIF3A|TM2D1|ADD3|ZRANB2|SUMO1|NDUFB6|FAM222B|PPP4R2|HIPK3|PPIL2|AKT3|SRSF10|CREBL2|SLC30A5|MLLT3|CDC73|MAP3K2|HEY2|RBPJ|CLOCK|THRB|MAP3K7|SORBS1|CTSV|SAP18|NABP1|PPHLN1|KPNA2|WDR3|ZMYM5|WIPI2|SP1|MDFIC|ZNF367|SMARCD1|SNAI2|THOC1|KLHL8|DR1|FEM1B|CCND2|SYAP	http://amigo.geneontology.org/amigo/term/GO:0031981
neurogenesis	Gene Ontology Slim	GO:0022008	107	590	6.24652e-19	3.43949e-17	IL6ST|FKBP4|HIPK1|GPM6A|CAPRIN1|BDNF|NKX2-1|RBPJ|DYNLT1|RORB|RORA|CBFA2T2|IRX5|SLITRK6|SLITRK2|SNAP25|FLRT3|PAFAH1B1|BMP7|UBE4B|BMP2|HCN1|SYT4|VIM|RNF6|SPRY3|FOXP1|STMN2|ACSL6|NDNF|MED1|PREX2|GAP43|EGR2|RAB11A|CRMP1|NEUROG2|DLX1|HOXB3|CUX2|PAX6|RHOA|ZEB1|	http://amigo.geneontology.org/amigo/term/GO:0022008
neurogenesis	Gene Ontology	GO:0022008	107	590	6.24652e-19	3.43949e-17	IL6ST|FKBP4|HIPK1|GPM6A|CAPRIN1|BDNF|NKX2-1|RBPJ|DYNLT1|RORB|RORA|CBFA2T2|IRX5|SLITRK6|SLITRK2|SNAP25|FLRT3|PAFAH1B1|BMP7|UBE4B|BMP2|HCN1|SYT4|VIM|RNF6|SPRY3|FOXP1|STMN2|ACSL6|NDNF|MED1|PREX2|GAP43|EGR2|RAB11A|CRMP1|NEUROG2|DLX1|HOXB3|CUX2|PAX6|RHOA|ZEB1|	http://amigo.geneontology.org/amigo/term/GO:0022008
cell surface receptor signaling pathway	Gene Ontology Slim	GO:0007166	166	1177	9.49086e-19	5.1854e-17	BCL2L1|ERRFI1|CD9|TSPAN14|SCG2|IL6ST|ZFAND5|BDNF|NKX2-1|CAV2|IFNW1|ADAMTS3|CDC73|RBPJ|COMMD7|RORA|MTMR4|CDKN2B|IGF1R|STAT3|DDX3X|LRRC4|CPE|ANGPT2|TNFRSF21|STK3|STK4|SNAI2|LRP6|KITLG|CHSY1|UBR5|SEMA3D|BMP7|CXCL2|BMP2|RFX4|NPY1R|HIPK1|VIM|ANGPTL1|PKD2|NETO1	http://amigo.geneontology.org/amigo/term/GO:0007166
cell surface receptor signaling pathway	Gene Ontology	GO:0007166	166	1177	9.49086e-19	5.1854e-17	BCL2L1|ERRFI1|CD9|TSPAN14|SCG2|IL6ST|ZFAND5|BDNF|NKX2-1|CAV2|IFNW1|ADAMTS3|CDC73|RBPJ|COMMD7|RORA|MTMR4|CDKN2B|IGF1R|STAT3|DDX3X|LRRC4|CPE|ANGPT2|TNFRSF21|STK3|STK4|SNAI2|LRP6|KITLG|CHSY1|UBR5|SEMA3D|BMP7|CXCL2|BMP2|RFX4|NPY1R|HIPK1|VIM|ANGPTL1|PKD2|NETO1	http://amigo.geneontology.org/amigo/term/GO:0007166
negative regulation of gene expression	Gene Ontology Slim	GO:0010629	118	698	1.14335e-18	6.19869e-17	KMT5A|SRSF10|CAPRIN1|NKX2-1|OTUD7B|SMG1|CDC73|NFE2L3|RBPJ|THRB|ZNF706|CBFA2T2|SAP18|PTBP1|DDX3X|IFNG|TMF1|PRMT6|IRF2BPL|ZNF366|SNAI2|TFAP2C|BMP7|BMP2|MEF2A|ZBTB21|RNF2|YBX3|FOXP2|DMRT1|FOXP1|ELAVL1|HESX1|CDKN1B|CELF4|PAIP2|EXOSC8|PUM1|NCK1|SOX17|NFIL3|ZBT	http://amigo.geneontology.org/amigo/term/GO:0010629
negative regulation of gene expression	Gene Ontology	GO:0010629	118	698	1.14335e-18	6.19869e-17	KMT5A|SRSF10|CAPRIN1|NKX2-1|OTUD7B|SMG1|CDC73|NFE2L3|RBPJ|THRB|ZNF706|CBFA2T2|SAP18|PTBP1|DDX3X|IFNG|TMF1|PRMT6|IRF2BPL|ZNF366|SNAI2|TFAP2C|BMP7|BMP2|MEF2A|ZBTB21|RNF2|YBX3|FOXP2|DMRT1|FOXP1|ELAVL1|HESX1|CDKN1B|CELF4|PAIP2|EXOSC8|PUM1|NCK1|SOX17|NFIL3|ZBT	http://amigo.geneontology.org/amigo/term/GO:0010629
cellular response to chemical stimulus	Gene Ontology Slim	GO:0070887	158	1104	2.09597e-18	1.12767e-16	BCL2L1|EGR1|SCG2|IL6ST|GPR22|HIPK1|NKX2-1|CAV2|GPR37|IFNW1|ADAMTS3|CDC73|RBPJ|THRB|RORB|RORA|MTMR4|CDKN2B|AQP4|STAT3|DDX3X|CXADR|LRRC4|TMF1|RAP1B|SERPINB9|TNFRSF21|SNAI2|UBR5|BMP7|CXCL2|BMP2|HCN1|BAK1|GNG2|RNF6|LMO2|YBX3|TNFSF11|ATP2A2|STMN2|GABRG2|NDNF|G	http://amigo.geneontology.org/amigo/term/GO:0070887
cellular response to chemical stimulus	Gene Ontology	GO:0070887	158	1104	2.09597e-18	1.12767e-16	BCL2L1|EGR1|SCG2|IL6ST|GPR22|HIPK1|NKX2-1|CAV2|GPR37|IFNW1|ADAMTS3|CDC73|RBPJ|THRB|RORB|RORA|MTMR4|CDKN2B|AQP4|STAT3|DDX3X|CXADR|LRRC4|TMF1|RAP1B|SERPINB9|TNFRSF21|SNAI2|UBR5|BMP7|CXCL2|BMP2|HCN1|BAK1|GNG2|RNF6|LMO2|YBX3|TNFSF11|ATP2A2|STMN2|GABRG2|NDNF|G	http://amigo.geneontology.org/amigo/term/GO:0070887
negative regulation of biosynthetic process	Gene Ontology Slim	GO:0009890	108	614	2.95621e-18	1.57844e-16	HIF3A|KMT5A|CAPRIN1|NKX2-1|OTUD7B|CDC73|NFE2L3|HEY2|RBPJ|THRB|ZNF706|CBFA2T2|BRCA1|DDX3X|MDFIC|PRMT6|IRF2BPL|ZNF366|SNAI2|TFAP2C|BMP7|BMP2|ZBTB21|RNF2|YBX3|FOXP2|DMRT1|FOXP1|HESX1|CDKN1B|PAIP2|PUM1|TRIB2|NCK1|SOX17|NFIL3|ZBTB33|DLX1|SIRT1|HOXB3|CUX2|PAX6|	http://amigo.geneontology.org/amigo/term/GO:0009890
negative regulation of biosynthetic process	Gene Ontology	GO:0009890	108	614	2.95621e-18	1.57844e-16	HIF3A|KMT5A|CAPRIN1|NKX2-1|OTUD7B|CDC73|NFE2L3|HEY2|RBPJ|THRB|ZNF706|CBFA2T2|BRCA1|DDX3X|MDFIC|PRMT6|IRF2BPL|ZNF366|SNAI2|TFAP2C|BMP7|BMP2|ZBTB21|RNF2|YBX3|FOXP2|DMRT1|FOXP1|HESX1|CDKN1B|PAIP2|PUM1|TRIB2|NCK1|SOX17|NFIL3|ZBTB33|DLX1|SIRT1|HOXB3|CUX2|PAX6|	http://amigo.geneontology.org/amigo/term/GO:0009890
regulation of multicellular organismal development	Gene Ontology Slim	GO:2000026	123	757	3.258e-18	1.72649e-16	ERRFI1|IL6ST|FKBP4|CAPRIN1|BDNF|NKX2-1|KITLG|CDC73|RBPJ|DYNLT1|CBFA2T2|SLITRK6|SLITRK2|IFNG|MTM1|TNFRSF21|STK3|STK4|SNAI2|THOC1|BMP7|SNAP25|BMP2|RFX4|SYT4|VIM|RNF6|YBX3|IL7R|TNFSF11|FOXP1|ACVR1C|STMN2|CDKN1B|GPM6B|NDNF|MED1|EGR1|THBS2|SOX17|CYP26B1|LRRTM2	http://amigo.geneontology.org/amigo/term/GO:2000026
regulation of multicellular organismal development	Gene Ontology	GO:2000026	123	757	3.258e-18	1.72649e-16	ERRFI1|IL6ST|FKBP4|CAPRIN1|BDNF|NKX2-1|KITLG|CDC73|RBPJ|DYNLT1|CBFA2T2|SLITRK6|SLITRK2|IFNG|MTM1|TNFRSF21|STK3|STK4|SNAI2|THOC1|BMP7|SNAP25|BMP2|RFX4|SYT4|VIM|RNF6|YBX3|IL7R|TNFSF11|FOXP1|ACVR1C|STMN2|CDKN1B|GPM6B|NDNF|MED1|EGR1|THBS2|SOX17|CYP26B1|LRRTM2	http://amigo.geneontology.org/amigo/term/GO:2000026
response to organic substance	Gene Ontology Slim	GO:0010033	157	1102	3.92641e-18	2.06517e-16	BCL2L1|TRIM13|UBE3A|IL6ST|GPR22|HIPK1|NKX2-1|CAV2|IFNW1|ADAMTS3|CDC73|GPR180|RBPJ|THRB|RORB|RORA|MTMR4|CDKN2B|AQP4|STAT3|DDIT4|LRRC4|TMF1|CREB1|RAP1B|TNFRSF21|LPL|SNAI2|UBR5|BMP7|CXCL2|BMP2|HCN1|BAK1|GNG2|MALT1|RNF103|RNF6|LMO2|YBX3|TNFSF11|ACVR1C|STMN2|G	http://amigo.geneontology.org/amigo/term/GO:0010033
response to organic substance	Gene Ontology	GO:0010033	157	1102	3.92641e-18	2.06517e-16	BCL2L1|TRIM13|UBE3A|IL6ST|GPR22|HIPK1|NKX2-1|CAV2|IFNW1|ADAMTS3|CDC73|GPR180|RBPJ|THRB|RORB|RORA|MTMR4|CDKN2B|AQP4|STAT3|DDIT4|LRRC4|TMF1|CREB1|RAP1B|TNFRSF21|LPL|SNAI2|UBR5|BMP7|CXCL2|BMP2|HCN1|BAK1|GNG2|MALT1|RNF103|RNF6|LMO2|YBX3|TNFSF11|ACVR1C|STMN2|G	http://amigo.geneontology.org/amigo/term/GO:0010033
negative regulation of cellular biosynthetic process	Gene Ontology Slim	GO:0031327	107	609	4.56602e-18	2.3838e-16	HIF3A|KMT5A|CAPRIN1|NKX2-1|OTUD7B|CDC73|NFE2L3|HEY2|RBPJ|THRB|ZNF706|CBFA2T2|BRCA1|DDX3X|MDFIC|PRMT6|IRF2BPL|ZNF366|SNAI2|TFAP2C|BMP7|BMP2|ZBTB21|RNF2|YBX3|FOXP2|DMRT1|FOXP1|HESX1|CDKN1B|PAIP2|PUM1|TRIB2|NCK1|SOX17|NFIL3|ZBTB33|DLX1|SIRT1|HOXB3|CUX2|PAX6|	http://amigo.geneontology.org/amigo/term/GO:0031327
negative regulation of cellular biosynthetic process	Gene Ontology	GO:0031327	107	609	4.56602e-18	2.3838e-16	HIF3A|KMT5A|CAPRIN1|NKX2-1|OTUD7B|CDC73|NFE2L3|HEY2|RBPJ|THRB|ZNF706|CBFA2T2|BRCA1|DDX3X|MDFIC|PRMT6|IRF2BPL|ZNF366|SNAI2|TFAP2C|BMP7|BMP2|ZBTB21|RNF2|YBX3|FOXP2|DMRT1|FOXP1|HESX1|CDKN1B|PAIP2|PUM1|TRIB2|NCK1|SOX17|NFIL3|ZBTB33|DLX1|SIRT1|HOXB3|CUX2|PAX6|	http://amigo.geneontology.org/amigo/term/GO:0031327
negative regulation of macromolecule biosynthetic process	Gene Ontology Slim	GO:0010558	104	586	7.3806e-18	3.82489e-16	HIF3A|KMT5A|CAPRIN1|NKX2-1|OTUD7B|CDC73|NFE2L3|HEY2|RBPJ|THRB|ZNF706|CBFA2T2|DDX3X|MDFIC|PRMT6|IRF2BPL|ZNF366|SNAI2|TFAP2C|BMP7|BMP2|ZBTB21|RNF2|YBX3|FOXP2|DMRT1|FOXP1|HESX1|CDKN1B|PAIP2|PUM1|TRIB2|NCK1|SOX17|NFIL3|ZBTB33|DLX1|SIRT1|HOXB3|CUX2|PAX6|ZEB1|S	http://amigo.geneontology.org/amigo/term/GO:0010558
negative regulation of macromolecule biosynthetic process	Gene Ontology	GO:0010558	104	586	7.3806e-18	3.82489e-16	HIF3A|KMT5A|CAPRIN1|NKX2-1|OTUD7B|CDC73|NFE2L3|HEY2|RBPJ|THRB|ZNF706|CBFA2T2|DDX3X|MDFIC|PRMT6|IRF2BPL|ZNF366|SNAI2|TFAP2C|BMP7|BMP2|ZBTB21|RNF2|YBX3|FOXP2|DMRT1|FOXP1|HESX1|CDKN1B|PAIP2|PUM1|TRIB2|NCK1|SOX17|NFIL3|ZBTB33|DLX1|SIRT1|HOXB3|CUX2|PAX6|ZEB1|S	http://amigo.geneontology.org/amigo/term/GO:0010558
intracellular signal transduction	Gene Ontology Slim	GO:0035556	161	1156	9.37574e-18	4.8126e-16	BCL2L1|TRIM13|PGAP2|KMT5A|SCG2|HIPK3|HIPK1|AKT3|CAV2|KITLG|GPR37|OTUD7B|ASB7|ASB5|MAP3K7|RORA|DDIT4|ARHGAP29|IGF1R|DDX3X|RAB5B|WNK3|RAP1B|STK3|STK4|HMGCR|SNAI2|TMEM101|BMP2|BMP7|NKIRAS2|AKAP1|BAK1|GNG2|STK38L|YBX3|TNFSF11|ATP2A2|RRAS2|DCLK1|CCDC68|NDNF|GA	http://amigo.geneontology.org/amigo/term/GO:0035556
intracellular signal transduction	Gene Ontology	GO:0035556	161	1156	9.37574e-18	4.8126e-16	BCL2L1|TRIM13|PGAP2|KMT5A|SCG2|HIPK3|HIPK1|AKT3|CAV2|KITLG|GPR37|OTUD7B|ASB7|ASB5|MAP3K7|RORA|DDIT4|ARHGAP29|IGF1R|DDX3X|RAB5B|WNK3|RAP1B|STK3|STK4|HMGCR|SNAI2|TMEM101|BMP2|BMP7|NKIRAS2|AKAP1|BAK1|GNG2|STK38L|YBX3|TNFSF11|ATP2A2|RRAS2|DCLK1|CCDC68|NDNF|GA	http://amigo.geneontology.org/amigo/term/GO:0035556
negative regulation of cellular macromolecule biosynthetic process	Gene Ontology Slim	GO:2000113	102	570	9.42308e-18	4.8126e-16	KMT5A|CAPRIN1|NKX2-1|OTUD7B|CDC73|NFE2L3|HEY2|RBPJ|THRB|ZNF706|CBFA2T2|DDX3X|MDFIC|PRMT6|IRF2BPL|ZNF366|SNAI2|TFAP2C|BMP7|BMP2|ZBTB21|RNF2|YBX3|FOXP2|DMRT1|FOXP1|HESX1|CDKN1B|PAIP2|PUM1|NCK1|SOX17|NFIL3|ZBTB33|DLX1|SIRT1|HOXB3|CUX2|PAX6|ZEB1|STRN3|NOG|SFP	http://amigo.geneontology.org/amigo/term/GO:2000113
negative regulation of cellular macromolecule biosynthetic process	Gene Ontology	GO:2000113	102	570	9.42308e-18	4.8126e-16	KMT5A|CAPRIN1|NKX2-1|OTUD7B|CDC73|NFE2L3|HEY2|RBPJ|THRB|ZNF706|CBFA2T2|DDX3X|MDFIC|PRMT6|IRF2BPL|ZNF366|SNAI2|TFAP2C|BMP7|BMP2|ZBTB21|RNF2|YBX3|FOXP2|DMRT1|FOXP1|HESX1|CDKN1B|PAIP2|PUM1|NCK1|SOX17|NFIL3|ZBTB33|DLX1|SIRT1|HOXB3|CUX2|PAX6|ZEB1|STRN3|NOG|SFP	http://amigo.geneontology.org/amigo/term/GO:2000113
generation of neurons	Gene Ontology Slim	GO:0048699	99	550	2.05456e-17	1.04176e-15	IL6ST|FKBP4|HIPK1|GPM6A|CAPRIN1|BDNF|NKX2-1|RBPJ|DYNLT1|RORB|RORA|CBFA2T2|IRX5|NTN4|SLITRK6|SLITRK2|SNAP25|FLRT3|BMP7|UBE4B|BMP2|HCN1|SYT4|VIM|RNF6|SPRY3|FOXP1|STMN2|ACSL6|NDNF|MED1|PREX2|GAP43|EGR2|RAB11A|CRMP1|NEUROG2|DLX1|HOXB3|CUX2|PAX6|RHOA|ZEB1|BNIP	http://amigo.geneontology.org/amigo/term/GO:0048699
generation of neurons	Gene Ontology	GO:0048699	99	550	2.05456e-17	1.04176e-15	IL6ST|FKBP4|HIPK1|GPM6A|CAPRIN1|BDNF|NKX2-1|RBPJ|DYNLT1|RORB|RORA|CBFA2T2|IRX5|NTN4|SLITRK6|SLITRK2|SNAP25|FLRT3|BMP7|UBE4B|BMP2|HCN1|SYT4|VIM|RNF6|SPRY3|FOXP1|STMN2|ACSL6|NDNF|MED1|PREX2|GAP43|EGR2|RAB11A|CRMP1|NEUROG2|DLX1|HOXB3|CUX2|PAX6|RHOA|ZEB1|BNIP	http://amigo.geneontology.org/amigo/term/GO:0048699
regulation of biological quality	Gene Ontology Slim	GO:0065008	197	1561	2.13794e-17	1.0763e-15	LIN7A|BCL2L1|LIN7C|UBE2Q1|SUMO1|CDK16|PLXNC1|CREBL2|CAPRIN1|SLC30A5|DPH6|SLC30A7|ARL2BP|SLC30A3|MSR1|CDC73|THRB|SCN2A|RORA|NAPB|MKLN1|GOLGA7|IRX5|LBH|SLITRK6|AQP4|SLITRK2|RAB11FIP2|LRRC4|MTM1|TMF1|CPE|CREB1|RAP1B|FLRT3|LPL|STK4|ARRDC3|KITLG|ATP2B4|BMP2|SN	http://amigo.geneontology.org/amigo/term/GO:0065008
regulation of biological quality	Gene Ontology	GO:0065008	197	1561	2.13794e-17	1.0763e-15	LIN7A|BCL2L1|LIN7C|UBE2Q1|SUMO1|CDK16|PLXNC1|CREBL2|CAPRIN1|SLC30A5|DPH6|SLC30A7|ARL2BP|SLC30A3|MSR1|CDC73|THRB|SCN2A|RORA|NAPB|MKLN1|GOLGA7|IRX5|LBH|SLITRK6|AQP4|SLITRK2|RAB11FIP2|LRRC4|MTM1|TMF1|CPE|CREB1|RAP1B|FLRT3|LPL|STK4|ARRDC3|KITLG|ATP2B4|BMP2|SN	http://amigo.geneontology.org/amigo/term/GO:0065008
negative regulation of nucleobase-containing compound metabolic process	Gene Ontology Slim	GO:0045934	102	578	2.16446e-17	1.08192e-15	HIF3A|KMT5A|SRSF10|NKX2-1|OTUD7B|CDC73|NFE2L3|RBPJ|THRB|ZNF706|CBFA2T2|SAP18|PTBP1|DDIT4|MDFIC|PRMT6|IRF2BPL|ZNF366|SNAI2|THOC1|GFI1|UBR5|TFAP2C|BMP7|BMP2|ZBTB21|RNF2|YBX3|FOXP2|DMRT1|FOXP1|ELAVL1|HESX1|CDKN1B|CELF4|MED1|SOX17|NFIL3|ZBTB33|DLX1|SIRT1|HOXB	http://amigo.geneontology.org/amigo/term/GO:0045934
negative regulation of nucleobase-containing compound metabolic process	Gene Ontology	GO:0045934	102	578	2.16446e-17	1.08192e-15	HIF3A|KMT5A|SRSF10|NKX2-1|OTUD7B|CDC73|NFE2L3|RBPJ|THRB|ZNF706|CBFA2T2|SAP18|PTBP1|DDIT4|MDFIC|PRMT6|IRF2BPL|ZNF366|SNAI2|THOC1|GFI1|UBR5|TFAP2C|BMP7|BMP2|ZBTB21|RNF2|YBX3|FOXP2|DMRT1|FOXP1|ELAVL1|HESX1|CDKN1B|CELF4|MED1|SOX17|NFIL3|ZBTB33|DLX1|SIRT1|HOXB	http://amigo.geneontology.org/amigo/term/GO:0045934
negative regulation of RNA metabolic process	Gene Ontology Slim	GO:0051253	98	547	3.92078e-17	1.94603e-15	HIF3A|KMT5A|SRSF10|NKX2-1|OTUD7B|CDC73|NFE2L3|RBPJ|THRB|ZNF706|CBFA2T2|SAP18|PTBP1|MDFIC|PRMT6|IRF2BPL|ZNF366|SNAI2|GFI1|TFAP2C|BMP7|BMP2|ZBTB21|RNF2|YBX3|FOXP2|DMRT1|FOXP1|ELAVL1|HESX1|CDKN1B|CELF4|MED1|SOX17|NFIL3|ZBTB33|DLX1|SIRT1|HOXB3|CUX2|PAX6|ZEB1|	http://amigo.geneontology.org/amigo/term/GO:0051253
negative regulation of RNA metabolic process	Gene Ontology	GO:0051253	98	547	3.92078e-17	1.94603e-15	HIF3A|KMT5A|SRSF10|NKX2-1|OTUD7B|CDC73|NFE2L3|RBPJ|THRB|ZNF706|CBFA2T2|SAP18|PTBP1|MDFIC|PRMT6|IRF2BPL|ZNF366|SNAI2|GFI1|TFAP2C|BMP7|BMP2|ZBTB21|RNF2|YBX3|FOXP2|DMRT1|FOXP1|ELAVL1|HESX1|CDKN1B|CELF4|MED1|SOX17|NFIL3|ZBTB33|DLX1|SIRT1|HOXB3|CUX2|PAX6|ZEB1|	http://amigo.geneontology.org/amigo/term/GO:0051253
sequence-specific DNA binding	Gene Ontology Slim	GO:0043565	94	515	6.23216e-17	3.07163e-15	CREBL2|NKX2-1|LHX2|NFE2L3|RBPJ|THRB|RORB|RORA|IRX5|TSNAX|SP1|CREB1|DMRTC2|SNAI2|RFX4|RFX7|ELK4|MAF|ZBTB21|YBX3|HOXC9|DMRT1|DMRT2|FOXP1|HESX1|FOXJ2|GTF2E1|EGR2|PPARGC1A|SOX17|NFIL3|ZBTB33|DLX1|SIRT1|HOXB3|HOXB4|CUX2|PAX6|PAX3|ZEB1|PKNOX1|ETV5|SFPQ|MEF2A|TO	http://amigo.geneontology.org/amigo/term/GO:0043565
sequence-specific DNA binding	Gene Ontology	GO:0043565	94	515	6.23216e-17	3.07163e-15	CREBL2|NKX2-1|LHX2|NFE2L3|RBPJ|THRB|RORB|RORA|IRX5|TSNAX|SP1|CREB1|DMRTC2|SNAI2|RFX4|RFX7|ELK4|MAF|ZBTB21|YBX3|HOXC9|DMRT1|DMRT2|FOXP1|HESX1|FOXJ2|GTF2E1|EGR2|PPARGC1A|SOX17|NFIL3|ZBTB33|DLX1|SIRT1|HOXB3|HOXB4|CUX2|PAX6|PAX3|ZEB1|PKNOX1|ETV5|SFPQ|MEF2A|TO	http://amigo.geneontology.org/amigo/term/GO:0043565
response to chemical	Gene Ontology Slim	GO:0042221	218	1827	9.97462e-17	4.88202e-15	BCL2L1|TRIM13|EGR1|SCG2|IL6ST|GPR22|HIPK1|SLC30A5|SLC30A7|NKX2-1|CAV2|SLC25A12|GPR37|IFNW1|ADAMTS3|CDC73|GPR180|RBPJ|THRB|RORB|RORA|SLC12A5|MTMR4|CDKN2B|AQP4|STAT3|DDX3X|CXADR|LRRC4|TMF1|ACVR1C|CREB1|ZNF366|SERPINB9|ANGPT2|TNFRSF21|LPL|SLC25A26|SNAI2|UBR5	http://amigo.geneontology.org/amigo/term/GO:0042221
response to chemical	Gene Ontology	GO:0042221	218	1827	9.97462e-17	4.88202e-15	BCL2L1|TRIM13|EGR1|SCG2|IL6ST|GPR22|HIPK1|SLC30A5|SLC30A7|NKX2-1|CAV2|SLC25A12|GPR37|IFNW1|ADAMTS3|CDC73|GPR180|RBPJ|THRB|RORB|RORA|SLC12A5|MTMR4|CDKN2B|AQP4|STAT3|DDX3X|CXADR|LRRC4|TMF1|ACVR1C|CREB1|ZNF366|SERPINB9|ANGPT2|TNFRSF21|LPL|SLC25A26|SNAI2|UBR5	http://amigo.geneontology.org/amigo/term/GO:0042221
organelle lumen	Gene Ontology Slim	GO:0043233	225	1910	1.09759e-16	5.26247e-15	HIF3A|TM2D1|ADD3|ZRANB2|SUMO1|NDUFB6|FAM222B|PPP4R2|HIPK3|PPIL2|AKT3|SRSF10|CREBL2|SLC30A5|ARL2BP|CDC73|MAP3K2|HEY2|RBPJ|CLOCK|THRB|MAP3K7|SORBS1|CTSV|SAP18|ABCD3|NABP1|PPHLN1|KPNA2|WDR3|ZMYM5|WIPI2|SP1|MDFIC|ZNF367|SMARCD1|SNAI2|THOC1|KLHL8|DR1|FEM1B|CCN	http://amigo.geneontology.org/amigo/term/GO:0043233
intracellular organelle lumen	Gene Ontology Slim	GO:0070013	225	1910	1.09759e-16	5.26247e-15	HIF3A|TM2D1|ADD3|ZRANB2|SUMO1|NDUFB6|FAM222B|PPP4R2|HIPK3|PPIL2|AKT3|SRSF10|CREBL2|SLC30A5|ARL2BP|CDC73|MAP3K2|HEY2|RBPJ|CLOCK|THRB|MAP3K7|SORBS1|CTSV|SAP18|ABCD3|NABP1|PPHLN1|KPNA2|WDR3|ZMYM5|WIPI2|SP1|MDFIC|ZNF367|SMARCD1|SNAI2|THOC1|KLHL8|DR1|FEM1B|CCN	http://amigo.geneontology.org/amigo/term/GO:0070013
membrane-enclosed lumen	Gene Ontology Slim	GO:0031974	225	1910	1.09759e-16	5.26247e-15	HIF3A|TM2D1|ADD3|ZRANB2|SUMO1|NDUFB6|FAM222B|PPP4R2|HIPK3|PPIL2|AKT3|SRSF10|CREBL2|SLC30A5|ARL2BP|CDC73|MAP3K2|HEY2|RBPJ|CLOCK|THRB|MAP3K7|SORBS1|CTSV|SAP18|ABCD3|NABP1|PPHLN1|KPNA2|WDR3|ZMYM5|WIPI2|SP1|MDFIC|ZNF367|SMARCD1|SNAI2|THOC1|KLHL8|DR1|FEM1B|CCN	http://amigo.geneontology.org/amigo/term/GO:0031974
intracellular organelle lumen	Gene Ontology	GO:0070013	225	1910	1.09759e-16	5.26247e-15	HIF3A|TM2D1|ADD3|ZRANB2|SUMO1|NDUFB6|FAM222B|PPP4R2|HIPK3|PPIL2|AKT3|SRSF10|CREBL2|SLC30A5|ARL2BP|CDC73|MAP3K2|HEY2|RBPJ|CLOCK|THRB|MAP3K7|SORBS1|CTSV|SAP18|ABCD3|NABP1|PPHLN1|KPNA2|WDR3|ZMYM5|WIPI2|SP1|MDFIC|ZNF367|SMARCD1|SNAI2|THOC1|KLHL8|DR1|FEM1B|CCN	http://amigo.geneontology.org/amigo/term/GO:0070013
membrane-enclosed lumen	Gene Ontology	GO:0031974	225	1910	1.09759e-16	5.26247e-15	HIF3A|TM2D1|ADD3|ZRANB2|SUMO1|NDUFB6|FAM222B|PPP4R2|HIPK3|PPIL2|AKT3|SRSF10|CREBL2|SLC30A5|ARL2BP|CDC73|MAP3K2|HEY2|RBPJ|CLOCK|THRB|MAP3K7|SORBS1|CTSV|SAP18|ABCD3|NABP1|PPHLN1|KPNA2|WDR3|ZMYM5|WIPI2|SP1|MDFIC|ZNF367|SMARCD1|SNAI2|THOC1|KLHL8|DR1|FEM1B|CCN	http://amigo.geneontology.org/amigo/term/GO:0031974
organelle lumen	Gene Ontology	GO:0043233	225	1910	1.09759e-16	5.26247e-15	HIF3A|TM2D1|ADD3|ZRANB2|SUMO1|NDUFB6|FAM222B|PPP4R2|HIPK3|PPIL2|AKT3|SRSF10|CREBL2|SLC30A5|ARL2BP|CDC73|MAP3K2|HEY2|RBPJ|CLOCK|THRB|MAP3K7|SORBS1|CTSV|SAP18|ABCD3|NABP1|PPHLN1|KPNA2|WDR3|ZMYM5|WIPI2|SP1|MDFIC|ZNF367|SMARCD1|SNAI2|THOC1|KLHL8|DR1|FEM1B|CCN	http://amigo.geneontology.org/amigo/term/GO:0043233
positive regulation of multicellular organismal process	Gene Ontology Slim	GO:0051240	105	623	1.17139e-16	5.57834e-15	IL6ST|GPM6B|BDNF|RBPJ|MAP3K7|RORA|CBFA2T2|SLITRK6|CD28|SLITRK2|IFNG|MTM1|TMF1|FLRT3|CAPRIN1|KITLG|BMP7|BMP2|SYT4|NETO1|YBX3|IL7R|TNFSF11|FOXP1|STMN2|POLR3A|CELF1|MED1|EGR1|SOX17|CYP26B1|LRRTM2|PDE5A|PARP1|IL18R1|CUX2|PAX6|VEGFA|DMRT2|RHOB|RHOA|ZEB1|FGF2|B	http://amigo.geneontology.org/amigo/term/GO:0051240
positive regulation of multicellular organismal process	Gene Ontology	GO:0051240	105	623	1.17139e-16	5.57834e-15	IL6ST|GPM6B|BDNF|RBPJ|MAP3K7|RORA|CBFA2T2|SLITRK6|CD28|SLITRK2|IFNG|MTM1|TMF1|FLRT3|CAPRIN1|KITLG|BMP7|BMP2|SYT4|NETO1|YBX3|IL7R|TNFSF11|FOXP1|STMN2|POLR3A|CELF1|MED1|EGR1|SOX17|CYP26B1|LRRTM2|PDE5A|PARP1|IL18R1|CUX2|PAX6|VEGFA|DMRT2|RHOB|RHOA|ZEB1|FGF2|B	http://amigo.geneontology.org/amigo/term/GO:0051240
neuron differentiation	Gene Ontology Slim	GO:0030182	90	493	2.86677e-16	1.35604e-14	FKBP4|HIPK1|GPM6A|CAPRIN1|BDNF|NKX2-1|RBPJ|RORB|RORA|CBFA2T2|IRX5|SLITRK6|SLITRK2|UBE4B|FLRT3|BMP7|SNAP25|BMP2|HCN1|SYT4|VIM|RNF6|SPRY3|FOXP1|STMN2|NTN4|NDNF|MED1|PREX2|GAP43|EGR2|RAB11A|CRMP1|NEUROG2|DLX1|CUX2|PAX6|RHOA|ZEB1|BNIP2|PLXNC1|GNAQ|NOG|MEF2A|P	http://amigo.geneontology.org/amigo/term/GO:0030182
neuron differentiation	Gene Ontology	GO:0030182	90	493	2.86677e-16	1.35604e-14	FKBP4|HIPK1|GPM6A|CAPRIN1|BDNF|NKX2-1|RBPJ|RORB|RORA|CBFA2T2|IRX5|SLITRK6|SLITRK2|UBE4B|FLRT3|BMP7|SNAP25|BMP2|HCN1|SYT4|VIM|RNF6|SPRY3|FOXP1|STMN2|NTN4|NDNF|MED1|PREX2|GAP43|EGR2|RAB11A|CRMP1|NEUROG2|DLX1|CUX2|PAX6|RHOA|ZEB1|BNIP2|PLXNC1|GNAQ|NOG|MEF2A|P	http://amigo.geneontology.org/amigo/term/GO:0030182
negative regulation of nucleic acid-templated transcription	Gene Ontology Slim	GO:1903507	92	512	3.13989e-16	1.46556e-14	HIF3A|KMT5A|NKX2-1|OTUD7B|CDC73|NFE2L3|RBPJ|THRB|ZNF706|CBFA2T2|MDFIC|PRMT6|IRF2BPL|ZNF366|SNAI2|GFI1|BMP7|BMP2|ZBTB21|RNF2|YBX3|FOXP2|DMRT1|FOXP1|HESX1|CDKN1B|MED1|SOX17|NFIL3|ZBTB33|DLX1|SIRT1|HOXB3|CUX2|PAX6|ZEB1|CGGBP1|NOG|SFPQ|MEF2A|PRDM1|NAB1|CREBBP	http://amigo.geneontology.org/amigo/term/GO:1903507
negative regulation of RNA biosynthetic process	Gene Ontology Slim	GO:1902679	92	512	3.13989e-16	1.46556e-14	HIF3A|KMT5A|NKX2-1|OTUD7B|CDC73|NFE2L3|RBPJ|THRB|ZNF706|CBFA2T2|MDFIC|PRMT6|IRF2BPL|ZNF366|SNAI2|GFI1|BMP7|BMP2|ZBTB21|RNF2|YBX3|FOXP2|DMRT1|FOXP1|HESX1|CDKN1B|MED1|SOX17|NFIL3|ZBTB33|DLX1|SIRT1|HOXB3|CUX2|PAX6|ZEB1|CGGBP1|NOG|SFPQ|MEF2A|PRDM1|NAB1|CREBBP	http://amigo.geneontology.org/amigo/term/GO:1902679
negative regulation of RNA biosynthetic process	Gene Ontology	GO:1902679	92	512	3.13989e-16	1.46556e-14	HIF3A|KMT5A|NKX2-1|OTUD7B|CDC73|NFE2L3|RBPJ|THRB|ZNF706|CBFA2T2|MDFIC|PRMT6|IRF2BPL|ZNF366|SNAI2|GFI1|BMP7|BMP2|ZBTB21|RNF2|YBX3|FOXP2|DMRT1|FOXP1|HESX1|CDKN1B|MED1|SOX17|NFIL3|ZBTB33|DLX1|SIRT1|HOXB3|CUX2|PAX6|ZEB1|CGGBP1|NOG|SFPQ|MEF2A|PRDM1|NAB1|CREBBP	http://amigo.geneontology.org/amigo/term/GO:1902679
negative regulation of nucleic acid-templated transcription	Gene Ontology	GO:1903507	92	512	3.13989e-16	1.46556e-14	HIF3A|KMT5A|NKX2-1|OTUD7B|CDC73|NFE2L3|RBPJ|THRB|ZNF706|CBFA2T2|MDFIC|PRMT6|IRF2BPL|ZNF366|SNAI2|GFI1|BMP7|BMP2|ZBTB21|RNF2|YBX3|FOXP2|DMRT1|FOXP1|HESX1|CDKN1B|MED1|SOX17|NFIL3|ZBTB33|DLX1|SIRT1|HOXB3|CUX2|PAX6|ZEB1|CGGBP1|NOG|SFPQ|MEF2A|PRDM1|NAB1|CREBBP	http://amigo.geneontology.org/amigo/term/GO:1903507
nucleotide binding	Gene Ontology Slim	GO:0000166	176	1373	3.48815e-16	1.60683e-14	HSPA2|HSPA4|CDK16|HIPK3|HIPK1|AKT3|SRSF10|SMG1|DCK|MAP3K2|MAP3K7|ATP2B4|ESRP1|WEE1|HBS1L|IGF1R|DDX3X|UBE4B|WNK3|STK3|STK4|HMGCR|NLK|NKIRAS2|RBM46|RBM47|HCN1|ABCE1|HNRNPH1|ZBTB21|STK38L|ENOX1|ACTA1|ELAVL1|ATP2A2|RRAS2|PABPC5|CELF1|TPK1|ATP7A|ARL4C|SRSF5|NE	http://amigo.geneontology.org/amigo/term/GO:0000166
nucleoside phosphate binding	Gene Ontology Slim	GO:1901265	176	1373	3.48815e-16	1.60683e-14	HSPA2|HSPA4|CDK16|HIPK3|HIPK1|AKT3|SRSF10|SMG1|DCK|MAP3K2|MAP3K7|ATP2B4|ESRP1|WEE1|HBS1L|IGF1R|DDX3X|UBE4B|WNK3|STK3|STK4|HMGCR|NLK|NKIRAS2|RBM46|RBM47|HCN1|ABCE1|HNRNPH1|ZBTB21|STK38L|ENOX1|ACTA1|ELAVL1|ATP2A2|RRAS2|PABPC5|CELF1|TPK1|ATP7A|ARL4C|SRSF5|NE	http://amigo.geneontology.org/amigo/term/GO:1901265
nucleotide binding	Gene Ontology	GO:0000166	176	1373	3.48815e-16	1.60683e-14	HSPA2|HSPA4|CDK16|HIPK3|HIPK1|AKT3|SRSF10|SMG1|DCK|MAP3K2|MAP3K7|ATP2B4|ESRP1|WEE1|HBS1L|IGF1R|DDX3X|UBE4B|WNK3|STK3|STK4|HMGCR|NLK|NKIRAS2|RBM46|RBM47|HCN1|ABCE1|HNRNPH1|ZBTB21|STK38L|ENOX1|ACTA1|ELAVL1|ATP2A2|RRAS2|PABPC5|CELF1|TPK1|ATP7A|ARL4C|SRSF5|NE	http://amigo.geneontology.org/amigo/term/GO:0000166
nucleoside phosphate binding	Gene Ontology	GO:1901265	176	1373	3.48815e-16	1.60683e-14	HSPA2|HSPA4|CDK16|HIPK3|HIPK1|AKT3|SRSF10|SMG1|DCK|MAP3K2|MAP3K7|ATP2B4|ESRP1|WEE1|HBS1L|IGF1R|DDX3X|UBE4B|WNK3|STK3|STK4|HMGCR|NLK|NKIRAS2|RBM46|RBM47|HCN1|ABCE1|HNRNPH1|ZBTB21|STK38L|ENOX1|ACTA1|ELAVL1|ATP2A2|RRAS2|PABPC5|CELF1|TPK1|ATP7A|ARL4C|SRSF5|NE	http://amigo.geneontology.org/amigo/term/GO:1901265
[truncated: 12,563 more rows]
